# Supplementary material
Source: bioRxiv or medRxiv preprint supplement (https://www.medrxiv.org/content/medrxiv/early/2021/07/07/2021.07.01.21259583/DC1/embed/media-1.pdf)
Supplement: Supplementary file [file media-1.pdf]

We gratefully acknowledge the following Authors from the Originating laboratories responsible for obtaining the specimens, as well as the Submitting laboratories where the genome data were generated and shared via GISAID, on which this research is based.

All Submitters of data may be contacted directly via [www.gisaid.org](http://www.gisaid.org)

Authors are sorted alphabetically.

| Accession ID                                                                                                                                                                                                                                                                                                                                                                                                                                                              | Originating Laboratory                                      | Submitting Laboratory                                                                                 | Authors                                                                                                                                                                                                                                                         |
|---------------------------------------------------------------------------------------------------------------------------------------------------------------------------------------------------------------------------------------------------------------------------------------------------------------------------------------------------------------------------------------------------------------------------------------------------------------------------|-------------------------------------------------------------|-------------------------------------------------------------------------------------------------------|-----------------------------------------------------------------------------------------------------------------------------------------------------------------------------------------------------------------------------------------------------------------|
| EPI_ISL_1001042, EPI_ISL_1001043, EPI_ISL_1001044, EPI_ISL_1001045, EPI_ISL_1001046, EPI_ISL_1001047, EPI_ISL_1001048, EPI_ISL_1001049, EPI_ISL_1001050, EPI_ISL_1001051, EPI_ISL_1001052, EPI_ISL_1001053, EPI_ISL_1001054, EPI_ISL_1001055, EPI_ISL_1001056, EPI_ISL_1001057, EPI_ISL_1001058, EPI_ISL_1001059, EPI_ISL_1001060, EPI_ISL_1001061, EPI_ISL_1001062, EPI_ISL_1001063, EPI_ISL_1001064, EPI_ISL_1001065, EPI_ISL_1001066, EPI_ISL_1001067, EPI_ISL_1001068 | Centre Pasteur du Cameroun                                  | Institut Pasteur de Dakar                                                                             | Njoum Richard                                                                                                                                                                                                                                                   |
| see above                                                                                                                                                                                                                                                                                                                                                                                                                                                                 | NHLS Universitas Academic                                   | UFS Virology                                                                                          | PA Bester, MM Nyaga, P Nthiga, MT Mogotsi, Emmanuel Ogunbayo, D Goedhals, T de Oliveira                                                                                                                                                                         |
| EPI_ISL_1018088, EPI_ISL_1018089, EPI_ISL_1018090, EPI_ISL_1018091, EPI_ISL_1018092, EPI_ISL_1018093, EPI_ISL_1018094, EPI_ISL_1018095, EPI_ISL_1018096, EPI_ISL_1018097, EPI_ISL_1018098, EPI_ISL_1018099, EPI_ISL_1018100, EPI_ISL_1018101                                                                                                                                                                                                                              | Immunology, Noguchi Memorial Institute for Medical Research | Immunology, Noguchi Memorial Institute for Medical Research                                           | Adu.B., Egyir.B., Kumordjie.S., Agbodzi.B., Yeboah.C., Mohhtar.Q., Oteng.F., Owusu-Nyantakyi.C., Asare.K.M., Appiah-Kubi.J., Adusei-Poku.M.A., Odoom.J.K., Ampofo.W.K., Bonney.J.K.                                                                             |
| see above                                                                                                                                                                                                                                                                                                                                                                                                                                                                 | Nucleic Acid Testing, National Reference Laboratory         | GIGA Medical Genomics                                                                                 | Yvan Butera, Keith Durkin, Maria Artesi, Bouchra Boujemla, Robert Rutayisire, Patrick Tuyisenge, Esperence Umumararungu, Sébastien Bontems, Marie-Pierre Hayette, Nathalie Renotte, Swaibu Gatara, Jacob Souppgui, Sabin Nsanzimana, Vincent Bours, Léon Mutesa |
| EPI_ISL_1020288                                                                                                                                                                                                                                                                                                                                                                                                                                                           |                                                             |                                                                                                       |                                                                                                                                                                                                                                                                 |
| EPI_ISL_1035810, EPI_ISL_1035811, EPI_ISL_1035812, EPI_ISL_1035813, EPI_ISL_1035814, EPI_ISL_1035815, EPI_ISL_1035816, EPI_ISL_1035817, EPI_ISL_1035818, EPI_ISL_1035819, EPI_ISL_1035820, EPI_ISL_1035821, EPI_ISL_1035822, EPI_ISL_1035823, EPI_ISL_1035824, EPI_ISL_1035825, EPI_ISL_1035826, EPI_ISL_1035827                                                                                                                                                          | Nigerian Centre for Disease Control (NCDC)                  | African Centre of Excellence for Genomics of Infectious Diseases (ACEGID), Redeemer's University, Ede | Olawoye, I.B., et al                                                                                                                                                                                                                                            |
| see above                                                                                                                                                                                                                                                                                                                                                                                                                                                                 |                                                             |                                                                                                       |                                                                                                                                                                                                                                                                 |
| EPI_ISL_1039223, EPI_ISL_1039224, EPI_ISL_1039225, EPI_ISL_1039226                                                                                                                                                                                                                                                                                                                                                                                                        | KEMRI-Wellcome Trust Research Programme/KEMRI-CGMR-C Kilifi | KEMRI-Wellcome Trust Research Programme/KEMRI-CGMR-C Kilifi                                           | Githinji et al                                                                                                                                                                                                                                                  |
| EPI_ISL_1040664                                                                                                                                                                                                                                                                                                                                                                                                                                                           | Worcester Hospital                                          | NHLS/UCT                                                                                              | Arash Iranzadeh, Deelan Doolabh, Lynn Tyers, Bruna Galvao, Innocent Mudau, Marvin Hsiao, Kruger Marais, Diana Hardie, Stephen Korsman, Carolyn Williamson                                                                                                       |
| EPI_ISL_1040665                                                                                                                                                                                                                                                                                                                                                                                                                                                           | Heideveld Emergency Centre                                  | NHLS/UCT                                                                                              | Arash Iranzadeh, Deelan Doolabh, Lynn Tyers, Bruna Galvao, Innocent Mudau, Marvin Hsiao, Kruger Marais, Diana Hardie, Stephen Korsman, Carolyn Williamson                                                                                                       |
| EPI_ISL_1040666, EPI_ISL_1040667                                                                                                                                                                                                                                                                                                                                                                                                                                          | Guguletu CHC wc GDH                                         | NHLS/UCT                                                                                              | Arash Iranzadeh, Deelan Doolabh, Lynn Tyers, Bruna Galvao, Innocent Mudau, Marvin Hsiao, Kruger Marais, Diana Hardie, Stephen Korsman, Carolyn Williamson                                                                                                       |
| EPI_ISL_1040668                                                                                                                                                                                                                                                                                                                                                                                                                                                           | Groote Schuur Hospital wc GSH                               | NHLS/UCT                                                                                              | Arash Iranzadeh, Deelan Doolabh, Lynn Tyers, Bruna Galvao, Innocent Mudau, Marvin Hsiao, Kruger Marais, Diana Hardie, Stephen Korsman, Carolyn Williamson                                                                                                       |
| EPI_ISL_1040669                                                                                                                                                                                                                                                                                                                                                                                                                                                           | Guguletu CHC wc GDH                                         | NHLS/UCT                                                                                              | Arash Iranzadeh, Deelan Doolabh, Lynn Tyers, Bruna Galvao, Innocent Mudau, Marvin Hsiao, Kruger Marais, Diana Hardie, Stephen Korsman, Carolyn Williamson                                                                                                       |
| EPI_ISL_1040670                                                                                                                                                                                                                                                                                                                                                                                                                                                           | Heideveld Emergency Centre                                  | NHLS/UCT                                                                                              | Arash Iranzadeh, Deelan Doolabh, Lynn Tyers, Bruna Galvao, Innocent Mudau, Marvin Hsiao, Kruger Marais, Diana Hardie, Stephen Korsman, Carolyn Williamson                                                                                                       |
| EPI_ISL_1040671                                                                                                                                                                                                                                                                                                                                                                                                                                                           | Guguletu CHC wc GDH                                         | NHLS/UCT                                                                                              | Arash Iranzadeh, Deelan Doolabh, Lynn Tyers, Bruna Galvao, Innocent Mudau, Marvin Hsiao, Kruger Marais, Diana Hardie, Stephen Korsman, Carolyn Williamson                                                                                                       |
| EPI_ISL_1040672, EPI_ISL_1040673                                                                                                                                                                                                                                                                                                                                                                                                                                          | Groote Schuur Hospital wc GSH                               | NHLS/UCT                                                                                              | Arash Iranzadeh, Deelan Doolabh, Lynn Tyers, Bruna Galvao, Innocent Mudau, Marvin Hsiao, Kruger Marais, Diana Hardie, Stephen Korsman, Carolyn Williamson                                                                                                       |
| EPI_ISL_1040674                                                                                                                                                                                                                                                                                                                                                                                                                                                           | Kwamandlenkosi Clinic wc KMN                                | NHLS/UCT                                                                                              | Arash Iranzadeh, Deelan Doolabh, Lynn Tyers, Bruna Galvao, Innocent Mudau, Marvin Hsiao, Kruger Marais, Diana Hardie, Stephen Korsman, Carolyn Williamson                                                                                                       |
| EPI_ISL_1040675                                                                                                                                                                                                                                                                                                                                                                                                                                                           | Guguletu CHC wc GDH                                         | NHLS/UCT                                                                                              | Arash Iranzadeh, Deelan Doolabh, Lynn Tyers, Bruna Galvao, Innocent Mudau, Marvin Hsiao, Kruger Marais, Diana Hardie, Stephen Korsman, Carolyn Williamson                                                                                                       |
| EPI_ISL_1040676                                                                                                                                                                                                                                                                                                                                                                                                                                                           | Groote Schuur Hospital wc GSH                               | NHLS/UCT                                                                                              | Arash Iranzadeh, Deelan Doolabh, Lynn Tyers, Bruna Galvao, Innocent Mudau, Marvin Hsiao, Kruger Marais, Diana Hardie, Stephen Korsman, Carolyn Williamson                                                                                                       |
| EPI_ISL_1040677                                                                                                                                                                                                                                                                                                                                                                                                                                                           | Vanguard CHC wc VGC                                         | NHLS/UCT                                                                                              | Arash Iranzadeh, Deelan Doolabh, Lynn Tyers, Bruna Galvao, Innocent Mudau, Marvin Hsiao, Kruger Marais, Diana Hardie, Stephen Korsman, Carolyn Williamson                                                                                                       |
| EPI_ISL_1040678                                                                                                                                                                                                                                                                                                                                                                                                                                                           | Guguletu CHC wc GDH                                         | NHLS/UCT                                                                                              | Arash Iranzadeh, Deelan Doolabh, Lynn Tyers, Bruna Galvao, Innocent Mudau, Marvin Hsiao, Kruger Marais, Diana Hardie, Stephen Korsman, Carolyn Williamson                                                                                                       |
| EPI_ISL_1040679                                                                                                                                                                                                                                                                                                                                                                                                                                                           | Pacaltsdorp Clinic wc PAC                                   | NHLS/UCT                                                                                              | Arash Iranzadeh, Deelan Doolabh, Lynn Tyers, Bruna Galvao, Innocent Mudau, Marvin Hsiao, Kruger Marais, Diana Hardie, Stephen Korsman, Carolyn Williamson                                                                                                       |
| EPI_ISL_1040680                                                                                                                                                                                                                                                                                                                                                                                                                                                           | Heideveld Emergency Centre                                  | NHLS/UCT                                                                                              | Arash Iranzadeh, Deelan Doolabh, Lynn Tyers, Bruna Galvao, Innocent Mudau, Marvin Hsiao, Kruger Marais, Diana Hardie, Stephen Korsman, Carolyn Williamson                                                                                                       |
| EPI_ISL_1040681, EPI_ISL_1040682                                                                                                                                                                                                                                                                                                                                                                                                                                          | False Bay Hospital wc FBH                                   | NHLS/UCT                                                                                              | Arash Iranzadeh, Deelan Doolabh, Lynn Tyers, Bruna Galvao, Innocent Mudau, Marvin Hsiao, Kruger Marais, Diana Hardie, Stephen Korsman, Carolyn Williamson                                                                                                       |
| EPI_ISL_1040683, EPI_ISL_1040684, EPI_ISL_1040685, EPI_ISL_1040686, EPI_ISL_1040687                                                                                                                                                                                                                                                                                                                                                                                       | Groote Schuur Hospital wc GSH                               | NHLS/UCT                                                                                              | Arash Iranzadeh, Deelan Doolabh, Lynn Tyers, Bruna Galvao, Innocent Mudau, Marvin Hsiao, Kruger Marais, Diana Hardie, Stephen Korsman, Carolyn Williamson                                                                                                       |
| EPI_ISL_1040688                                                                                                                                                                                                                                                                                                                                                                                                                                                           | Heideveld Emergency Centre                                  | NHLS/UCT                                                                                              | Arash Iranzadeh, Deelan Doolabh, Lynn Tyers, Bruna Galvao, Innocent Mudau, Marvin Hsiao, Kruger Marais, Diana Hardie, Stephen Korsman, Carolyn Williamson                                                                                                       |
| EPI_ISL_1040689, EPI_ISL_1040690, EPI_ISL_1040691, EPI_ISL_1040692, EPI_ISL_1040693                                                                                                                                                                                                                                                                                                                                                                                       | Groote Schuur Hospital wc GSH                               | NHLS/UCT                                                                                              | Arash Iranzadeh, Deelan Doolabh, Lynn Tyers, Bruna Galvao, Innocent Mudau, Marvin Hsiao, Kruger Marais, Diana Hardie, Stephen Korsman, Carolyn Williamson                                                                                                       |
| EPI_ISL_1040694, EPI_ISL_1040695                                                                                                                                                                                                                                                                                                                                                                                                                                          | Hanover Park CHC wc HPH                                     | NHLS/UCT                                                                                              | Arash Iranzadeh, Deelan Doolabh, Lynn Tyers, Bruna Galvao, Innocent Mudau, Marvin Hsiao, Kruger Marais, Diana Hardie, Stephen Korsman, Carolyn Williamson                                                                                                       |
| EPI_ISL_1040696, EPI_ISL_1040697, EPI_ISL_1040698, EPI_ISL_1040699, EPI_ISL_1040700                                                                                                                                                                                                                                                                                                                                                                                       | Groote Schuur Hospital wc GSH                               | NHLS/UCT                                                                                              | Arash Iranzadeh, Deelan Doolabh, Lynn Tyers, Bruna Galvao, Innocent Mudau, Marvin Hsiao, Kruger Marais, Diana Hardie, Stephen Korsman, Carolyn Williamson                                                                                                       |





|                                                                                                                                                                                                                                                                                                                                                                                                                                                                                                                                                                                                                                                                                                                                                                                                                                                                                                                                                                                                                                                            |                                                                         |                                                                                                  |                                                                                                                                                                                                                                                                                                                                          |                                                                                                                                                           |
|------------------------------------------------------------------------------------------------------------------------------------------------------------------------------------------------------------------------------------------------------------------------------------------------------------------------------------------------------------------------------------------------------------------------------------------------------------------------------------------------------------------------------------------------------------------------------------------------------------------------------------------------------------------------------------------------------------------------------------------------------------------------------------------------------------------------------------------------------------------------------------------------------------------------------------------------------------------------------------------------------------------------------------------------------------|-------------------------------------------------------------------------|--------------------------------------------------------------------------------------------------|------------------------------------------------------------------------------------------------------------------------------------------------------------------------------------------------------------------------------------------------------------------------------------------------------------------------------------------|-----------------------------------------------------------------------------------------------------------------------------------------------------------|
| EPI_ISL_1040805                                                                                                                                                                                                                                                                                                                                                                                                                                                                                                                                                                                                                                                                                                                                                                                                                                                                                                                                                                                                                                            | Guguletu CHC wc GDH                                                     | NHLS/UCT                                                                                         | Williamson                                                                                                                                                                                                                                                                                                                               | Arash Iranzadeh, Deelan Doolabh, Lynn Tyers, Bruna Galvao, Innocent Mudau, Marvin Hsiao, Kruger Marais, Diana Hardie, Stephen Korsman, Carolyn Williamson |
| EPI_ISL_1040806                                                                                                                                                                                                                                                                                                                                                                                                                                                                                                                                                                                                                                                                                                                                                                                                                                                                                                                                                                                                                                            | Heideveld Emergency Centre                                              | NHLS/UCT                                                                                         | Williamson                                                                                                                                                                                                                                                                                                                               | Arash Iranzadeh, Deelan Doolabh, Lynn Tyers, Bruna Galvao, Innocent Mudau, Marvin Hsiao, Kruger Marais, Diana Hardie, Stephen Korsman, Carolyn Williamson |
| EPI_ISL_1040807, EPI_ISL_1040808                                                                                                                                                                                                                                                                                                                                                                                                                                                                                                                                                                                                                                                                                                                                                                                                                                                                                                                                                                                                                           | Groote Schuur Hospital wc GSH                                           | NHLS/UCT                                                                                         | Williamson                                                                                                                                                                                                                                                                                                                               | Arash Iranzadeh, Deelan Doolabh, Lynn Tyers, Bruna Galvao, Innocent Mudau, Marvin Hsiao, Kruger Marais, Diana Hardie, Stephen Korsman, Carolyn Williamson |
| EPI_ISL_1040809                                                                                                                                                                                                                                                                                                                                                                                                                                                                                                                                                                                                                                                                                                                                                                                                                                                                                                                                                                                                                                            | Hanover Park CHC wc HPH                                                 | NHLS/UCT                                                                                         | Williamson                                                                                                                                                                                                                                                                                                                               | Arash Iranzadeh, Deelan Doolabh, Lynn Tyers, Bruna Galvao, Innocent Mudau, Marvin Hsiao, Kruger Marais, Diana Hardie, Stephen Korsman, Carolyn Williamson |
| EPI_ISL_1040810                                                                                                                                                                                                                                                                                                                                                                                                                                                                                                                                                                                                                                                                                                                                                                                                                                                                                                                                                                                                                                            | Heideveld Emergency Centre                                              | NHLS/UCT                                                                                         | Williamson                                                                                                                                                                                                                                                                                                                               | Arash Iranzadeh, Deelan Doolabh, Lynn Tyers, Bruna Galvao, Innocent Mudau, Marvin Hsiao, Kruger Marais, Diana Hardie, Stephen Korsman, Carolyn Williamson |
| EPI_ISL_1040811, EPI_ISL_1040812, EPI_ISL_1040813                                                                                                                                                                                                                                                                                                                                                                                                                                                                                                                                                                                                                                                                                                                                                                                                                                                                                                                                                                                                          | Groote Schuur Hospital wc GSH                                           | NHLS/UCT                                                                                         | Williamson                                                                                                                                                                                                                                                                                                                               | Arash Iranzadeh, Deelan Doolabh, Lynn Tyers, Bruna Galvao, Innocent Mudau, Marvin Hsiao, Kruger Marais, Diana Hardie, Stephen Korsman, Carolyn Williamson |
| EPI_ISL_1040814                                                                                                                                                                                                                                                                                                                                                                                                                                                                                                                                                                                                                                                                                                                                                                                                                                                                                                                                                                                                                                            | Victoria Hospital wc VHW                                                | NHLS/UCT                                                                                         | Williamson                                                                                                                                                                                                                                                                                                                               | Arash Iranzadeh, Deelan Doolabh, Lynn Tyers, Bruna Galvao, Innocent Mudau, Marvin Hsiao, Kruger Marais, Diana Hardie, Stephen Korsman, Carolyn Williamson |
| EPI_ISL_1040815, EPI_ISL_1040816, EPI_ISL_1040817, EPI_ISL_1040818                                                                                                                                                                                                                                                                                                                                                                                                                                                                                                                                                                                                                                                                                                                                                                                                                                                                                                                                                                                         | Groote Schuur Hospital wc GSH                                           | NHLS/UCT                                                                                         | Williamson                                                                                                                                                                                                                                                                                                                               | Arash Iranzadeh, Deelan Doolabh, Lynn Tyers, Bruna Galvao, Innocent Mudau, Marvin Hsiao, Kruger Marais, Diana Hardie, Stephen Korsman, Carolyn Williamson |
| EPI_ISL_1040819, EPI_ISL_1040820, EPI_ISL_1040821                                                                                                                                                                                                                                                                                                                                                                                                                                                                                                                                                                                                                                                                                                                                                                                                                                                                                                                                                                                                          | CoVid WC Cape Town Metro                                                | NHLS/UCT                                                                                         | Williamson                                                                                                                                                                                                                                                                                                                               | Arash Iranzadeh, Deelan Doolabh, Lynn Tyers, Bruna Galvao, Innocent Mudau, Marvin Hsiao, Kruger Marais, Diana Hardie, Stephen Korsman, Carolyn Williamson |
| EPI_ISL_1040822                                                                                                                                                                                                                                                                                                                                                                                                                                                                                                                                                                                                                                                                                                                                                                                                                                                                                                                                                                                                                                            | Groote Schuur Hospital wc GSH                                           | NHLS/UCT                                                                                         | Williamson                                                                                                                                                                                                                                                                                                                               | Arash Iranzadeh, Deelan Doolabh, Lynn Tyers, Bruna Galvao, Innocent Mudau, Marvin Hsiao, Kruger Marais, Diana Hardie, Stephen Korsman, Carolyn Williamson |
| EPI_ISL_1048431, EPI_ISL_1048432, EPI_ISL_1048442                                                                                                                                                                                                                                                                                                                                                                                                                                                                                                                                                                                                                                                                                                                                                                                                                                                                                                                                                                                                          | National Health Laboratory Service, South Africa                        | KRISP, KZn Research Innovation and Sequencing Platform                                           | Laguda-Akingba O, Giandhari J, Pillay S, Lessells R, Mdlalose K, York D, Khan S, Emmanuel SJ, Tegally H, Wilkinson E, de Oliveira T                                                                                                                                                                                                      |                                                                                                                                                           |
| EPI_ISL_1063900                                                                                                                                                                                                                                                                                                                                                                                                                                                                                                                                                                                                                                                                                                                                                                                                                                                                                                                                                                                                                                            | Rwanda National Reference Laboratory                                    | Rwanda National Reference Laboratory                                                             |                                                                                                                                                                                                                                                                                                                                          | Enatha Mukantwari ,Umuringa Jeanne d'Arc                                                                                                                  |
| EPI_ISL_1063901                                                                                                                                                                                                                                                                                                                                                                                                                                                                                                                                                                                                                                                                                                                                                                                                                                                                                                                                                                                                                                            | Rwanda National Reference Laboratory                                    | Rwanda National Reference Laboratory                                                             |                                                                                                                                                                                                                                                                                                                                          | Enatha Mukantwari,UMuringa Jeanne d'Arc                                                                                                                   |
| EPI_ISL_1063905, EPI_ISL_1063915, EPI_ISL_1063994, EPI_ISL_1064022                                                                                                                                                                                                                                                                                                                                                                                                                                                                                                                                                                                                                                                                                                                                                                                                                                                                                                                                                                                         | Rwanda National Reference Laboratory                                    | Rwanda National Reference Laboratory                                                             |                                                                                                                                                                                                                                                                                                                                          | Enatha Mukantwari,Umuringa Jeanne d'Arc                                                                                                                   |
| EPI_ISL_1064147                                                                                                                                                                                                                                                                                                                                                                                                                                                                                                                                                                                                                                                                                                                                                                                                                                                                                                                                                                                                                                            | Rwanda National Reference Laboratory                                    | Rwanda National Reference Laboratory                                                             |                                                                                                                                                                                                                                                                                                                                          | ENatha Mukantwari,Umurunga Jeanne d'Arc                                                                                                                   |
| EPI_ISL_1064148, EPI_ISL_1064149                                                                                                                                                                                                                                                                                                                                                                                                                                                                                                                                                                                                                                                                                                                                                                                                                                                                                                                                                                                                                           | Rwanda National Reference Laboratory                                    | Rwanda National Reference Laboratory                                                             |                                                                                                                                                                                                                                                                                                                                          | Enatha Mukantwari,Umuringa Jeanne d'Arc                                                                                                                   |
| EPI_ISL_1069202, EPI_ISL_1069220, EPI_ISL_1069394, EPI_ISL_1069395, EPI_ISL_1069396, EPI_ISL_1069686, EPI_ISL_1070401, EPI_ISL_1071111, EPI_ISL_1072960                                                                                                                                                                                                                                                                                                                                                                                                                                                                                                                                                                                                                                                                                                                                                                                                                                                                                                    | National Health Laboratory Services                                     | National Health Laboratory Services, Virology                                                    |                                                                                                                                                                                                                                                                                                                                          | Mushal Ali, Thabo Mohale, Kathleen Subramoney                                                                                                             |
| EPI_ISL_1077348, EPI_ISL_1077349, EPI_ISL_1080931, EPI_ISL_1080932, EPI_ISL_1080933, EPI_ISL_1080935, EPI_ISL_1080936, EPI_ISL_1080937, EPI_ISL_1080939, EPI_ISL_1080940, EPI_ISL_1080941, EPI_ISL_1080943, EPI_ISL_1080944, EPI_ISL_1080945, EPI_ISL_1080947, EPI_ISL_1080948, EPI_ISL_1080949, EPI_ISL_1080950, EPI_ISL_1080952, EPI_ISL_1080953, EPI_ISL_1080954, EPI_ISL_1080956, EPI_ISL_1080957, EPI_ISL_1080958, EPI_ISL_1080959, EPI_ISL_1080961, EPI_ISL_1080962, EPI_ISL_1080963, EPI_ISL_1080965, EPI_ISL_1080966, EPI_ISL_1080967, EPI_ISL_1080969, EPI_ISL_1080970, EPI_ISL_1080971, EPI_ISL_1080972, EPI_ISL_1080974, EPI_ISL_1080975, EPI_ISL_1080976, EPI_ISL_1080978, EPI_ISL_1080979, EPI_ISL_1080981, EPI_ISL_1080982, EPI_ISL_1080983, EPI_ISL_1080984                                                                                                                                                                                                                                                                                 | National Health Laboratory Services                                     | National Health Laboratory Services                                                              |                                                                                                                                                                                                                                                                                                                                          | Mushal Ali, Thabo Mohale, Kathleen Subramoney                                                                                                             |
| see above                                                                                                                                                                                                                                                                                                                                                                                                                                                                                                                                                                                                                                                                                                                                                                                                                                                                                                                                                                                                                                                  | National Health Laboratory Services                                     | National Health Laboratory Services                                                              |                                                                                                                                                                                                                                                                                                                                          | Mushal Ali, Thabo Mohale, Kathleen Subramoney                                                                                                             |
| EPI_ISL_1085951                                                                                                                                                                                                                                                                                                                                                                                                                                                                                                                                                                                                                                                                                                                                                                                                                                                                                                                                                                                                                                            | Netcare/AMPATH                                                          | KRISP, KZn Research Innovation and Sequencing Platform                                           | Giandhari J, Pillay S, Maslo C, Sitharam L, Lessells R, Mdlalose K, York D, Khan S, Emmanuel SJ, Tegally H, Wilkinson E, de Oliveira T                                                                                                                                                                                                   |                                                                                                                                                           |
| EPI_ISL_1093432, EPI_ISL_1093435, EPI_ISL_1093436, EPI_ISL_1093461, EPI_ISL_1093467, EPI_ISL_1093468, EPI_ISL_1093474, EPI_ISL_1093476                                                                                                                                                                                                                                                                                                                                                                                                                                                                                                                                                                                                                                                                                                                                                                                                                                                                                                                     | Nigerian Centre for Disease Control (NCDC)                              | African Centre of Excellence for Genomics of Infectious Diseases (ACEGID), Redeemer's University |                                                                                                                                                                                                                                                                                                                                          | Olawoye, I.B., et al                                                                                                                                      |
| EPI_ISL_1098839, EPI_ISL_1109484, EPI_ISL_1109485, EPI_ISL_1109486, EPI_ISL_1109624, EPI_ISL_1109625, EPI_ISL_1109626, EPI_ISL_1109627, EPI_ISL_1109628, EPI_ISL_1109629, EPI_ISL_1109630                                                                                                                                                                                                                                                                                                                                                                                                                                                                                                                                                                                                                                                                                                                                                                                                                                                                  | Medical Ain Shams Research Institute (MASRI), Ain Shams University      | Medical Ain Shams Research Institute (MASRI), Ain Shams University                               | Hesham Elghazaly, Sara Hassan Agwa, Hala Hafez , Fatma Ebied, Manal Hamdy Elsaid, Mohamed Elhadidi, Aya Mohamed , Shima Moustafa, Reham Kassab, Iman Foda , Samia Abdou Girgis, Hoda Ezz Elarab, Hagar Elshora, Osama Mansour.                                                                                                           |                                                                                                                                                           |
| see above                                                                                                                                                                                                                                                                                                                                                                                                                                                                                                                                                                                                                                                                                                                                                                                                                                                                                                                                                                                                                                                  | Medical Ain Shams Research Institute (MASRI), Ain Shams University      | Medical Ain Shams Research Institute (MASRI), Ain Shams University                               | Hesham Elghazaly, Sara Hassan Agwa, Hala Hafez , Fatma Ebied, Manal Hamdy Elsaid, Mohamed Elhadidi, Aya Mohamed , Shima Moustafa, Reham Kassab, Iman Foda , Samia Abdou Girgis, Hoda Ezz Elarab, Hagar Elshora, Osama Mansour.                                                                                                           |                                                                                                                                                           |
| EPI_ISL_1116464, EPI_ISL_1116467, EPI_ISL_1116468, EPI_ISL_1118675, EPI_ISL_1118884, EPI_ISL_1118926                                                                                                                                                                                                                                                                                                                                                                                                                                                                                                                                                                                                                                                                                                                                                                                                                                                                                                                                                       | Laboratoire de Microbiologie- CHU Habib Bourguiba - Sfax                | Laboratoire des Procédés de Criblage Moléculaire et Cellulaire-Centre de Biotechnologie de Sfax  | Souissi,A., Abid,N., Ben Ayed,I., Gargouri,S., Abdelmoulah,F.,Elargoubi,A., Smeti,I., Bensaïd,M., Stambouli,N., Kharat,N., Ajili,F., Fki-berrajah,L., Mhalla,S., Chtourou,A., Gaaloul,I., Nabil,A., Turki,M., Aouni,M., Hammami,A., Mastouri,M., Karray Hakim,H., Kamoun,S., Rebai,A. and Masmoudi,S.                                    |                                                                                                                                                           |
| EPI_ISL_1132669, EPI_ISL_1132670, EPI_ISL_1132671, EPI_ISL_1132672, EPI_ISL_1132673, EPI_ISL_1132674, EPI_ISL_1132675, EPI_ISL_1132676, EPI_ISL_1132677, EPI_ISL_1132678, EPI_ISL_1132679, EPI_ISL_1132680, EPI_ISL_1132681, EPI_ISL_1132682, EPI_ISL_1132683, EPI_ISL_1132684, EPI_ISL_1132685, EPI_ISL_1132686, EPI_ISL_1132687, EPI_ISL_1132688, EPI_ISL_1132689, EPI_ISL_1132690, EPI_ISL_1132691, EPI_ISL_1132692, EPI_ISL_1132693, EPI_ISL_1132694, EPI_ISL_1132695, EPI_ISL_1132696, EPI_ISL_1132697, EPI_ISL_1132698, EPI_ISL_1132699, EPI_ISL_1132700, EPI_ISL_1132701, EPI_ISL_1132702, EPI_ISL_1132703, EPI_ISL_1132704, EPI_ISL_1132705, EPI_ISL_1132706, EPI_ISL_1132707, EPI_ISL_1132708, EPI_ISL_1132709, EPI_ISL_1132710, EPI_ISL_1132711, EPI_ISL_1132712, EPI_ISL_1132713, EPI_ISL_1132714, EPI_ISL_1132715, EPI_ISL_1132716, EPI_ISL_1132717, EPI_ISL_1132718, EPI_ISL_1132719, EPI_ISL_1132720, EPI_ISL_1132721, EPI_ISL_1132722, EPI_ISL_1132723, EPI_ISL_1132724, EPI_ISL_1132725, EPI_ISL_1132726, EPI_ISL_1132727, EPI_ISL_1132728 | Vaccines and Infectious Diseases Analytics Research Unit (VIDA)         | KRISP, KZn Research Innovation and Sequencing Platform                                           | Baillie Vicky, du Plessis Jeanine, Giandhari Jennifer, Pillay Sureshnee, Naidoo Yeshnee, Tegally Houriyah, de Oliveira Tulio, Madhi Shabir                                                                                                                                                                                               |                                                                                                                                                           |
| see above                                                                                                                                                                                                                                                                                                                                                                                                                                                                                                                                                                                                                                                                                                                                                                                                                                                                                                                                                                                                                                                  | Vaccines and Infectious Diseases Analytics Research Unit (VIDA)         | KRISP, KZn Research Innovation and Sequencing Platform                                           | Baillie Vicky, du Plessis Jeanine, Giandhari Jennifer, Pillay Sureshnee, Naidoo Yeshnee, Tegally Houriyah, de Oliveira Tulio, Madhi Shabir                                                                                                                                                                                               |                                                                                                                                                           |
| EPI_ISL_1137609                                                                                                                                                                                                                                                                                                                                                                                                                                                                                                                                                                                                                                                                                                                                                                                                                                                                                                                                                                                                                                            | Département de Maladies Infectieuses, CHU Farhat Hached Sousse, Tunisie | Laboratoire des Procédés de Criblage Moléculaire et Cellulaire-Centre de Biotechnologie de Sfax  | Souissi,A., Abid,N., Abid, M., Chawech, H.,Letaief, A., Ben Ayed,I., Gargouri,S., Abdelmoulah,F.,Elargoubi,A., Smeti,I., Bensaïd,M., Stambouli,N., Kharat,N., Ajili,F., Fki-berrajah,L., Mhalla,S., Chtourou,A., Gaaloul,I., Nabil,A., Turki,M., Aouni,M., Hammami,A., Mastouri,M., Karray Hakim,H., Kamoun,S., Rebai,A. and Masmoudi,S. |                                                                                                                                                           |
| EPI_ISL_1141525, EPI_ISL_1165078, EPI_ISL_1165079, EPI_ISL_1165080, EPI_ISL_1165081, EPI_ISL_1165082, EPI_ISL_1165083, EPI_ISL_1165084, EPI_ISL_1165085, EPI_ISL_1165086, EPI_ISL_1165087                                                                                                                                                                                                                                                                                                                                                                                                                                                                                                                                                                                                                                                                                                                                                                                                                                                                  | Medical Ain Shams Research Institute (MASRI), Ain Shams University      | Medical Ain Shams Research Institute (MASRI), Ain Shams University                               | Hesham Elghazaly, Sara Hassan Agwa, Hala Hafez , Fatma Ebied, Manal Hamdy Elsaid, Mohamed Elhadidi, Aya Mohamed , Shima Moustafa, Reham Kassab, Iman Foda , Samia Abdou Girgis, Hoda Ezz Elarab, Hagar Elshora, Osama Mansour.                                                                                                           |                                                                                                                                                           |
| see above                                                                                                                                                                                                                                                                                                                                                                                                                                                                                                                                                                                                                                                                                                                                                                                                                                                                                                                                                                                                                                                  | Medical Ain Shams Research Institute (MASRI), Ain Shams University      | Medical Ain Shams Research Institute (MASRI), Ain Shams University                               | Hesham Elghazaly, Sara Hassan Agwa, Hala Hafez , Fatma Ebied, Manal Hamdy Elsaid, Mohamed Elhadidi, Aya Mohamed , Shima Moustafa, Reham Kassab, Iman Foda , Samia Abdou Girgis, Hoda Ezz Elarab, Hagar Elshora, Osama Mansour.                                                                                                           |                                                                                                                                                           |
| EPI_ISL_1167135, EPI_ISL_1167141, EPI_ISL_1167145, EPI_ISL_1167146                                                                                                                                                                                                                                                                                                                                                                                                                                                                                                                                                                                                                                                                                                                                                                                                                                                                                                                                                                                         | Iressel Genomics lab                                                    | L'institut de Recherche en Santé, de Surveillance Épidémiologique et de Formation (IRESSEF)      | Souleymane MBOUP, Abdou PADANE, Abdou KANTEH, Abdul Karim SESAY , Khadim GUEYE, Papa Alassane DIAW, Birahim Piere NDIAYE, Barada CISSE, Aminata MBOUP, Moustapha MBOW, Ndeye Coumba Toure KANE, Nafisatou LEYE, Gora LO, Ambrose AHOUIDI , Astou Gaye GAYE, Aminata DIA, Yacine DIA                                                      |                                                                                                                                                           |
| EPI_ISL_1167186, EPI_ISL_1167187, EPI_ISL_1167188, EPI_ISL_1167189, EPI_ISL_1167190, EPI_ISL_1167191, EPI_ISL_1167192, EPI_ISL_1167193, EPI_ISL_1167194, EPI_ISL_1167195, EPI_ISL_1167196, EPI_ISL_1167197                                                                                                                                                                                                                                                                                                                                                                                                                                                                                                                                                                                                                                                                                                                                                                                                                                                 | Medical Ain Shams Research Institute (MASRI), Ain Shams University      | Medical Ain Shams Research Institute (MASRI), Ain Shams University                               | Hesham Elghazaly, Sara Hassan Agwa, Hala Hafez , Fatma Ebied, Manal Hamdy Elsaid, Mohamed Elhadidi, Aya Mohamed , Shima Moustafa, Reham Kassab, Iman Foda , Samia Abdou Girgis, Hoda Ezz Elarab, Hagar Elshora, Osama Mansour.                                                                                                           |                                                                                                                                                           |
| see above                                                                                                                                                                                                                                                                                                                                                                                                                                                                                                                                                                                                                                                                                                                                                                                                                                                                                                                                                                                                                                                  | Medical Ain Shams Research Institute (MASRI), Ain Shams University      | Medical Ain Shams Research Institute (MASRI), Ain Shams University                               | Hesham Elghazaly, Sara Hassan Agwa, Hala Hafez , Fatma Ebied, Manal Hamdy Elsaid, Mohamed Elhadidi, Aya Mohamed , Shima Moustafa, Reham Kassab, Iman Foda , Samia Abdou Girgis, Hoda Ezz Elarab, Hagar Elshora, Osama Mansour.                                                                                                           |                                                                                                                                                           |
| EPI_ISL_1170957                                                                                                                                                                                                                                                                                                                                                                                                                                                                                                                                                                                                                                                                                                                                                                                                                                                                                                                                                                                                                                            | HIV Molecular laboratory, Ethiopian Public Health Institute             | HIV Molecular Laboratory                                                                         | Weldemariam,A.G., Vanaerschot,M., Abichu,G., Kidane,E., Damena,D., Tessema,S.K., Gutema,G., Ahnyong,V., Detweiler,A., Tan,M., Neff,N.,Fahsbender,E., Kalantar,K., Leta,D. and Tato,C.                                                                                                                                                    |                                                                                                                                                           |
| EPI_ISL_1170958                                                                                                                                                                                                                                                                                                                                                                                                                                                                                                                                                                                                                                                                                                                                                                                                                                                                                                                                                                                                                                            | HIV Molecular Laboratory, Ethiopian Public Health Institute, Ethiopia   | HIV molecular lab, Ethiopian Public Health Institute, Ethiopian                                  | Weldemariam,A.G., Vanaerschot,M., Abichu,G., Kidane,E., Damena,D., Tessema,S.K., Gutema,G., Ahnyong,V., Detweiler,A., Tan,M., Neff,N.,Fahsbender,E., Kalantar,K., Leta,D. and Tato,C.                                                                                                                                                    |                                                                                                                                                           |

|                                                                                                                                                                                                                                                                                                                                                                                                                                                                                                                                                                                                                                                                                                                                                                                                                                                                                                                                                                                                                                                                                                                                                                                                                                                                                                                                                                                                                                                                                                                                                                                                                                                                                                                                                                                                                                                                                                                                                                                                                                                                                                                                                                                                                                                                                                                                                                                                                                                                                                                                                                                                                                                                                                                                                                                                                                                                                                                                                                                                          |                                                                                                             |                                                                                        |                                                                                                                                                                                                                                                                                                                                       |
|----------------------------------------------------------------------------------------------------------------------------------------------------------------------------------------------------------------------------------------------------------------------------------------------------------------------------------------------------------------------------------------------------------------------------------------------------------------------------------------------------------------------------------------------------------------------------------------------------------------------------------------------------------------------------------------------------------------------------------------------------------------------------------------------------------------------------------------------------------------------------------------------------------------------------------------------------------------------------------------------------------------------------------------------------------------------------------------------------------------------------------------------------------------------------------------------------------------------------------------------------------------------------------------------------------------------------------------------------------------------------------------------------------------------------------------------------------------------------------------------------------------------------------------------------------------------------------------------------------------------------------------------------------------------------------------------------------------------------------------------------------------------------------------------------------------------------------------------------------------------------------------------------------------------------------------------------------------------------------------------------------------------------------------------------------------------------------------------------------------------------------------------------------------------------------------------------------------------------------------------------------------------------------------------------------------------------------------------------------------------------------------------------------------------------------------------------------------------------------------------------------------------------------------------------------------------------------------------------------------------------------------------------------------------------------------------------------------------------------------------------------------------------------------------------------------------------------------------------------------------------------------------------------------------------------------------------------------------------------------------------------|-------------------------------------------------------------------------------------------------------------|----------------------------------------------------------------------------------------|---------------------------------------------------------------------------------------------------------------------------------------------------------------------------------------------------------------------------------------------------------------------------------------------------------------------------------------|
| EPI_ISL_1190766, EPI_ISL_1190767, EPI_ISL_1190768                                                                                                                                                                                                                                                                                                                                                                                                                                                                                                                                                                                                                                                                                                                                                                                                                                                                                                                                                                                                                                                                                                                                                                                                                                                                                                                                                                                                                                                                                                                                                                                                                                                                                                                                                                                                                                                                                                                                                                                                                                                                                                                                                                                                                                                                                                                                                                                                                                                                                                                                                                                                                                                                                                                                                                                                                                                                                                                                                        | CREMER(Centre de Rechercherches sur les Maladies Emergentes et Ré-émergentes)                               | TransVIHMI(Recherches Translotionnelles sur le VIH et les Maladies Infectieuses)       | Celestin Godwe, Christelle Butel, Martin Maidadi Foudi, Laetitia Serrano, Dowbiss Meta Djomsi, Nicole Vidal, Esemu Livo, Rodrigue Kamga, Marie Amougou , Eitel Mpoudi Ngole,Ahidojo Ayoubu, Marcel Tongo, Martine Peeters, Eric Delaporte                                                                                             |
| EPI_ISL_1191597, EPI_ISL_1191606, EPI_ISL_1191607                                                                                                                                                                                                                                                                                                                                                                                                                                                                                                                                                                                                                                                                                                                                                                                                                                                                                                                                                                                                                                                                                                                                                                                                                                                                                                                                                                                                                                                                                                                                                                                                                                                                                                                                                                                                                                                                                                                                                                                                                                                                                                                                                                                                                                                                                                                                                                                                                                                                                                                                                                                                                                                                                                                                                                                                                                                                                                                                                        | Virology Department, Victoria Hospital, Plaine-Wilhems, Mauritius                                           | National Institute for Communicable Diseases of the National Health Laboratory Service | Ramuth M, Manraj SS, Sonoo J, Baboo SB, Amoako DG, Scheepers C, Mohale T, Ntuli N, Mahlangu B, Ismail A, Bhiman JN                                                                                                                                                                                                                    |
| EPI_ISL_1191782, EPI_ISL_1191783, EPI_ISL_1191784, EPI_ISL_1191785, EPI_ISL_1191786, EPI_ISL_1191787, EPI_ISL_1191788, EPI_ISL_1191789, EPI_ISL_1191805, EPI_ISL_1191806, EPI_ISL_1191807, EPI_ISL_1191808, EPI_ISL_1191809, EPI_ISL_1191810, EPI_ISL_1191811, EPI_ISL_1191812, EPI_ISL_1191813, EPI_ISL_1191814, EPI_ISL_1191815, EPI_ISL_1191816, EPI_ISL_1191817, EPI_ISL_1191818, EPI_ISL_1191819, EPI_ISL_1191820, EPI_ISL_1191821, EPI_ISL_1191822, EPI_ISL_1191823, EPI_ISL_1191824, EPI_ISL_1191825, EPI_ISL_1191826, EPI_ISL_1191827, EPI_ISL_1191828, EPI_ISL_1191829, EPI_ISL_1191830, EPI_ISL_1191831, EPI_ISL_1191832, EPI_ISL_1191833, EPI_ISL_1191834, EPI_ISL_1191835, EPI_ISL_1191836, EPI_ISL_1191837, EPI_ISL_1191838, EPI_ISL_1191839, EPI_ISL_1191840, EPI_ISL_1191841, EPI_ISL_1191842, EPI_ISL_1191843, EPI_ISL_1191844, EPI_ISL_1191845, EPI_ISL_1191846, EPI_ISL_1191847, EPI_ISL_1191848, EPI_ISL_1191849, EPI_ISL_1191850, EPI_ISL_1191851, EPI_ISL_1191852, EPI_ISL_1191853, EPI_ISL_1191854, EPI_ISL_1191855, EPI_ISL_1191856, EPI_ISL_1191857, EPI_ISL_1191858, EPI_ISL_1191859, EPI_ISL_1191860, EPI_ISL_1191861, EPI_ISL_1191862, EPI_ISL_1191863, EPI_ISL_1191864, EPI_ISL_1191865, EPI_ISL_1191866, EPI_ISL_1191867, EPI_ISL_1191868, EPI_ISL_1191869, EPI_ISL_1191870, EPI_ISL_1191871, EPI_ISL_1191872, EPI_ISL_1191873, EPI_ISL_1191874, EPI_ISL_1191875, EPI_ISL_1191876, EPI_ISL_1191877, EPI_ISL_1191878, EPI_ISL_1191879, EPI_ISL_1191880, EPI_ISL_1191881, EPI_ISL_1191882, EPI_ISL_1191883, EPI_ISL_1191884, EPI_ISL_1191885, EPI_ISL_1191886, EPI_ISL_1191887, EPI_ISL_1191888, EPI_ISL_1191889, EPI_ISL_1191890, EPI_ISL_1191891, EPI_ISL_1191892, EPI_ISL_1191893, EPI_ISL_1191894, EPI_ISL_1191895, EPI_ISL_1191896, EPI_ISL_1191897, EPI_ISL_1191898, EPI_ISL_1191899, EPI_ISL_1191900, EPI_ISL_1191901, EPI_ISL_1191902, EPI_ISL_1191903, EPI_ISL_1191904, EPI_ISL_1191905, EPI_ISL_1191906, EPI_ISL_1191907, EPI_ISL_1191908, EPI_ISL_1191909, EPI_ISL_1191910, EPI_ISL_1191911, EPI_ISL_1191912, EPI_ISL_1191913, EPI_ISL_1191914, EPI_ISL_1191915, EPI_ISL_1191916, EPI_ISL_1191917, EPI_ISL_1191918, EPI_ISL_1191919, EPI_ISL_1191920, EPI_ISL_1191921, EPI_ISL_1191922, EPI_ISL_1191923, EPI_ISL_1191924, EPI_ISL_1191925, EPI_ISL_1191926, EPI_ISL_1191927, EPI_ISL_1191928, EPI_ISL_1191929, EPI_ISL_1191930, EPI_ISL_1191931, EPI_ISL_1191932, EPI_ISL_1191933, EPI_ISL_1191934, EPI_ISL_1191935, EPI_ISL_1191936, EPI_ISL_1191937, EPI_ISL_1191938, EPI_ISL_1191939, EPI_ISL_1191940, EPI_ISL_1191941, EPI_ISL_1191942, EPI_ISL_1191943, EPI_ISL_1191944, EPI_ISL_1191945, EPI_ISL_1191946, EPI_ISL_1191947, EPI_ISL_1191948, EPI_ISL_1191949, EPI_ISL_1191950, EPI_ISL_1191951, EPI_ISL_1191952, EPI_ISL_1191953, EPI_ISL_1191954, EPI_ISL_1191955, EPI_ISL_1191956, EPI_ISL_1191957, EPI_ISL_1191958, EPI_ISL_1191959, EPI_ISL_1191960, EPI_ISL_1191961, EPI_ISL_1191962, EPI_ISL_1191963, EPI_ISL_1191964, EPI_ISL_1191965, EPI_ISL_1191966 | National Microbiology Reference Laboratory                                                                  | Quadram Institute Bioscience                                                           | Tapfumaneni Mashe, Faustinos T Takawira, Hlanai Gumbo, Kenneth K Maeka, Agnes Juru, Charles Nyagupe, Sekesai Zinyowera, Muchaneta Mugabe, Thanh Le Viet, Justin O'Grady, Gemma Kay, David Baker, Gaetan Thilliez, Ana-Victoria Gutierrez, Robert Kingsley, Leonardo de Oliveira Martins, Andrew Tarupiwa, Andrew J. Page, Raiva Simbi |
| EPI_ISL_1195295, EPI_ISL_1195296, EPI_ISL_1195298, EPI_ISL_1195300                                                                                                                                                                                                                                                                                                                                                                                                                                                                                                                                                                                                                                                                                                                                                                                                                                                                                                                                                                                                                                                                                                                                                                                                                                                                                                                                                                                                                                                                                                                                                                                                                                                                                                                                                                                                                                                                                                                                                                                                                                                                                                                                                                                                                                                                                                                                                                                                                                                                                                                                                                                                                                                                                                                                                                                                                                                                                                                                       | National Microbiology Reference Laboratory                                                                  | Quadram Institute Bioscience                                                           | Tapfumaneni Mashe, Faustinos T Takawira, Hlanai Gumbo, Kenneth K Maeka, Agnes Juru, Charles Nyagupe, Sekesai Zinyowera, Muchaneta Mugabe, Thanh Le Viet, Justin O'Grady, Gemma Kay, David Baker, Gaetan Thilliez, Ana-Victoria Gutierrez, Robert Kingsley, Leonardo de Oliveira Martins, Andrew Tarupiwa, Andrew J. Page, Raiva Simbi |
| EPI_ISL_1196000                                                                                                                                                                                                                                                                                                                                                                                                                                                                                                                                                                                                                                                                                                                                                                                                                                                                                                                                                                                                                                                                                                                                                                                                                                                                                                                                                                                                                                                                                                                                                                                                                                                                                                                                                                                                                                                                                                                                                                                                                                                                                                                                                                                                                                                                                                                                                                                                                                                                                                                                                                                                                                                                                                                                                                                                                                                                                                                                                                                          | Mbabane Clinic                                                                                              | National Institute for Communicable Diseases of the National Health Laboratory Service | Maphalala GP, Amoako DG, Scheepers C, Mohale T, Ntuli N, Mahlangu B, Ismail A, Bhiman JN                                                                                                                                                                                                                                              |
| EPI_ISL_1196001                                                                                                                                                                                                                                                                                                                                                                                                                                                                                                                                                                                                                                                                                                                                                                                                                                                                                                                                                                                                                                                                                                                                                                                                                                                                                                                                                                                                                                                                                                                                                                                                                                                                                                                                                                                                                                                                                                                                                                                                                                                                                                                                                                                                                                                                                                                                                                                                                                                                                                                                                                                                                                                                                                                                                                                                                                                                                                                                                                                          | Mbabane Gov Hospital                                                                                        | National Institute for Communicable Diseases of the National Health Laboratory Service | Maphalala GP, Amoako DG, Scheepers C, Mohale T, Ntuli N, Mahlangu B, Ismail A, Bhiman JN                                                                                                                                                                                                                                              |
| EPI_ISL_1196002                                                                                                                                                                                                                                                                                                                                                                                                                                                                                                                                                                                                                                                                                                                                                                                                                                                                                                                                                                                                                                                                                                                                                                                                                                                                                                                                                                                                                                                                                                                                                                                                                                                                                                                                                                                                                                                                                                                                                                                                                                                                                                                                                                                                                                                                                                                                                                                                                                                                                                                                                                                                                                                                                                                                                                                                                                                                                                                                                                                          | Women correctional                                                                                          | National Institute for Communicable Diseases of the National Health Laboratory Service | Maphalala GP, Amoako DG, Scheepers C, Mohale T, Ntuli N, Mahlangu B, Ismail A, Bhiman JN                                                                                                                                                                                                                                              |
| EPI_ISL_1196003                                                                                                                                                                                                                                                                                                                                                                                                                                                                                                                                                                                                                                                                                                                                                                                                                                                                                                                                                                                                                                                                                                                                                                                                                                                                                                                                                                                                                                                                                                                                                                                                                                                                                                                                                                                                                                                                                                                                                                                                                                                                                                                                                                                                                                                                                                                                                                                                                                                                                                                                                                                                                                                                                                                                                                                                                                                                                                                                                                                          | Homecare                                                                                                    | National Institute for Communicable Diseases of the National Health Laboratory Service | Maphalala GP, Amoako DG, Scheepers C, Mohale T, Ntuli N, Mahlangu B, Ismail A, Bhiman JN                                                                                                                                                                                                                                              |
| EPI_ISL_1196004                                                                                                                                                                                                                                                                                                                                                                                                                                                                                                                                                                                                                                                                                                                                                                                                                                                                                                                                                                                                                                                                                                                                                                                                                                                                                                                                                                                                                                                                                                                                                                                                                                                                                                                                                                                                                                                                                                                                                                                                                                                                                                                                                                                                                                                                                                                                                                                                                                                                                                                                                                                                                                                                                                                                                                                                                                                                                                                                                                                          | Mbabane PHU                                                                                                 | National Institute for Communicable Diseases of the National Health Laboratory Service | Maphalala GP, Amoako DG, Scheepers C, Mohale T, Ntuli N, Mahlangu B, Ismail A, Bhiman JN                                                                                                                                                                                                                                              |
| EPI_ISL_1196005                                                                                                                                                                                                                                                                                                                                                                                                                                                                                                                                                                                                                                                                                                                                                                                                                                                                                                                                                                                                                                                                                                                                                                                                                                                                                                                                                                                                                                                                                                                                                                                                                                                                                                                                                                                                                                                                                                                                                                                                                                                                                                                                                                                                                                                                                                                                                                                                                                                                                                                                                                                                                                                                                                                                                                                                                                                                                                                                                                                          | RSP Clinic                                                                                                  | National Institute for Communicable Diseases of the National Health Laboratory Service | Maphalala GP, Amoako DG, Scheepers C, Mohale T, Ntuli N, Mahlangu B, Ismail A, Bhiman JN                                                                                                                                                                                                                                              |
| EPI_ISL_1196008, EPI_ISL_1196009, EPI_ISL_1196010                                                                                                                                                                                                                                                                                                                                                                                                                                                                                                                                                                                                                                                                                                                                                                                                                                                                                                                                                                                                                                                                                                                                                                                                                                                                                                                                                                                                                                                                                                                                                                                                                                                                                                                                                                                                                                                                                                                                                                                                                                                                                                                                                                                                                                                                                                                                                                                                                                                                                                                                                                                                                                                                                                                                                                                                                                                                                                                                                        | Nhlangano Health Centre                                                                                     | National Institute for Communicable Diseases of the National Health Laboratory Service | Maphalala GP, Amoako DG, Scheepers C, Mohale T, Ntuli N, Mahlangu B, Ismail A, Bhiman JN                                                                                                                                                                                                                                              |
| EPI_ISL_1196011                                                                                                                                                                                                                                                                                                                                                                                                                                                                                                                                                                                                                                                                                                                                                                                                                                                                                                                                                                                                                                                                                                                                                                                                                                                                                                                                                                                                                                                                                                                                                                                                                                                                                                                                                                                                                                                                                                                                                                                                                                                                                                                                                                                                                                                                                                                                                                                                                                                                                                                                                                                                                                                                                                                                                                                                                                                                                                                                                                                          | Homecare                                                                                                    | National Institute for Communicable Diseases of the National Health Laboratory Service | Maphalala GP, Amoako DG, Scheepers C, Mohale T, Ntuli N, Mahlangu B, Ismail A, Bhiman JN                                                                                                                                                                                                                                              |
| EPI_ISL_1196015, EPI_ISL_1196016                                                                                                                                                                                                                                                                                                                                                                                                                                                                                                                                                                                                                                                                                                                                                                                                                                                                                                                                                                                                                                                                                                                                                                                                                                                                                                                                                                                                                                                                                                                                                                                                                                                                                                                                                                                                                                                                                                                                                                                                                                                                                                                                                                                                                                                                                                                                                                                                                                                                                                                                                                                                                                                                                                                                                                                                                                                                                                                                                                         | Mbabane PHU                                                                                                 | National Institute for Communicable Diseases of the National Health Laboratory Service | Maphalala GP, Amoako DG, Scheepers C, Mohale T, Ntuli N, Mahlangu B, Ismail A, Bhiman JN                                                                                                                                                                                                                                              |
| EPI_ISL_1196017, EPI_ISL_1196018                                                                                                                                                                                                                                                                                                                                                                                                                                                                                                                                                                                                                                                                                                                                                                                                                                                                                                                                                                                                                                                                                                                                                                                                                                                                                                                                                                                                                                                                                                                                                                                                                                                                                                                                                                                                                                                                                                                                                                                                                                                                                                                                                                                                                                                                                                                                                                                                                                                                                                                                                                                                                                                                                                                                                                                                                                                                                                                                                                         | Manzini RRT                                                                                                 | National Institute for Communicable Diseases of the National Health Laboratory Service | Maphalala GP, Amoako DG, Scheepers C, Mohale T, Ntuli N, Mahlangu B, Ismail A, Bhiman JN                                                                                                                                                                                                                                              |
| EPI_ISL_1196019                                                                                                                                                                                                                                                                                                                                                                                                                                                                                                                                                                                                                                                                                                                                                                                                                                                                                                                                                                                                                                                                                                                                                                                                                                                                                                                                                                                                                                                                                                                                                                                                                                                                                                                                                                                                                                                                                                                                                                                                                                                                                                                                                                                                                                                                                                                                                                                                                                                                                                                                                                                                                                                                                                                                                                                                                                                                                                                                                                                          | RSP Clinic                                                                                                  | National Institute for Communicable Diseases of the National Health Laboratory Service | Maphalala GP, Amoako DG, Scheepers C, Mohale T, Ntuli N, Mahlangu B, Ismail A, Bhiman JN                                                                                                                                                                                                                                              |
| EPI_ISL_1208956, EPI_ISL_1208957, EPI_ISL_1208958, EPI_ISL_1208959, EPI_ISL_1208960, EPI_ISL_1208961, EPI_ISL_1208963, EPI_ISL_1208964                                                                                                                                                                                                                                                                                                                                                                                                                                                                                                                                                                                                                                                                                                                                                                                                                                                                                                                                                                                                                                                                                                                                                                                                                                                                                                                                                                                                                                                                                                                                                                                                                                                                                                                                                                                                                                                                                                                                                                                                                                                                                                                                                                                                                                                                                                                                                                                                                                                                                                                                                                                                                                                                                                                                                                                                                                                                   | Namibia Institute of Pathology (NIP)                                                                        | National Institute for Communicable Diseases of the National Health Laboratory Service | Van Rooyen G, Konstantinus I, Amoako DG, Scheepers C, Mohale T, Ntuli N, Mahlangu B, Ismail A, Bhiman JN                                                                                                                                                                                                                              |
| EPI_ISL_1208967, EPI_ISL_1208968                                                                                                                                                                                                                                                                                                                                                                                                                                                                                                                                                                                                                                                                                                                                                                                                                                                                                                                                                                                                                                                                                                                                                                                                                                                                                                                                                                                                                                                                                                                                                                                                                                                                                                                                                                                                                                                                                                                                                                                                                                                                                                                                                                                                                                                                                                                                                                                                                                                                                                                                                                                                                                                                                                                                                                                                                                                                                                                                                                         | University of Namibia (UNAM LAB)                                                                            | National Institute for Communicable Diseases of the National Health Laboratory Service | Van Rooyen G, Konstantinus I, Amoako DG, Scheepers C, Mohale T, Ntuli N, Mahlangu B, Ismail A, Bhiman JN                                                                                                                                                                                                                              |
| EPI_ISL_1208969, EPI_ISL_1208971, EPI_ISL_1208972, EPI_ISL_1208973, EPI_ISL_1208974, EPI_ISL_1208975, EPI_ISL_1208976, EPI_ISL_1208977, EPI_ISL_1208978, EPI_ISL_1208986, EPI_ISL_1208987, EPI_ISL_1208988, EPI_ISL_1208989, EPI_ISL_1208994, EPI_ISL_1208996, EPI_ISL_1209006, EPI_ISL_1209009                                                                                                                                                                                                                                                                                                                                                                                                                                                                                                                                                                                                                                                                                                                                                                                                                                                                                                                                                                                                                                                                                                                                                                                                                                                                                                                                                                                                                                                                                                                                                                                                                                                                                                                                                                                                                                                                                                                                                                                                                                                                                                                                                                                                                                                                                                                                                                                                                                                                                                                                                                                                                                                                                                          | Namibia Institute of Pathology (NIP)                                                                        | National Institute for Communicable Diseases of the National Health Laboratory Service | Van Rooyen G, Konstantinus I, Amoako DG, Scheepers C, Mohale T, Ntuli N, Mahlangu B, Ismail A, Bhiman JN                                                                                                                                                                                                                              |
| EPI_ISL_1209011, EPI_ISL_1209012                                                                                                                                                                                                                                                                                                                                                                                                                                                                                                                                                                                                                                                                                                                                                                                                                                                                                                                                                                                                                                                                                                                                                                                                                                                                                                                                                                                                                                                                                                                                                                                                                                                                                                                                                                                                                                                                                                                                                                                                                                                                                                                                                                                                                                                                                                                                                                                                                                                                                                                                                                                                                                                                                                                                                                                                                                                                                                                                                                         | University of Namibia (UNAM LAB)                                                                            | National Institute for Communicable Diseases of the National Health Laboratory Service | Van Rooyen G, Konstantinus I, Amoako DG, Scheepers C, Mohale T, Ntuli N, Mahlangu B, Ismail A, Bhiman JN                                                                                                                                                                                                                              |
| EPI_ISL_1216081, EPI_ISL_1216083, EPI_ISL_1216085, EPI_ISL_1216087, EPI_ISL_1216088, EPI_ISL_1216090, EPI_ISL_1216092, EPI_ISL_1216093, EPI_ISL_1216095, EPI_ISL_1216097, EPI_ISL_1216099, EPI_ISL_1216100, EPI_ISL_1216104, EPI_ISL_1216106, EPI_ISL_1216107, EPI_ISL_1216109, EPI_ISL_1216110, EPI_ISL_1216112, EPI_ISL_1216114, EPI_ISL_1216116, EPI_ISL_1216118, EPI_ISL_1216119, EPI_ISL_1216121, EPI_ISL_1216123, EPI_ISL_1216124, EPI_ISL_1216127, EPI_ISL_1216128, EPI_ISL_1216130, EPI_ISL_1216132, EPI_ISL_1216133, EPI_ISL_1234527, EPI_ISL_1234531, EPI_ISL_1234532, EPI_ISL_1234534, EPI_ISL_1234535, EPI_ISL_1234536                                                                                                                                                                                                                                                                                                                                                                                                                                                                                                                                                                                                                                                                                                                                                                                                                                                                                                                                                                                                                                                                                                                                                                                                                                                                                                                                                                                                                                                                                                                                                                                                                                                                                                                                                                                                                                                                                                                                                                                                                                                                                                                                                                                                                                                                                                                                                                       | MRCG at LSHTM Genomics lab                                                                                  | MRCG at LSHTM Genomics lab                                                             | Abdul Karim sesay, Abdoulie Kante, Jarra Manneh, Mariama Kujabi, Bakary Sanyang                                                                                                                                                                                                                                                       |
| EPI_ISL_1239225, EPI_ISL_1239226, EPI_ISL_1239228, EPI_ISL_1239233, EPI_ISL_1239235, EPI_ISL_1239236, EPI_ISL_1239237, EPI_ISL_1239239, EPI_ISL_1239240, EPI_ISL_1239241, EPI_ISL_1239242, EPI_ISL_1239244, EPI_ISL_1239245, EPI_ISL_1239246, EPI_ISL_1239247, EPI_ISL_1239248, EPI_ISL_1239249, EPI_ISL_1239250, EPI_ISL_1239251, EPI_ISL_1239252, EPI_ISL_1239253, EPI_ISL_1239254, EPI_ISL_1239255, EPI_ISL_1239256, EPI_ISL_1239257, EPI_ISL_1239258, EPI_ISL_1239259, EPI_ISL_1239260, EPI_ISL_1239261, EPI_ISL_1239263, EPI_ISL_1239264, EPI_ISL_1239265, EPI_ISL_1239266                                                                                                                                                                                                                                                                                                                                                                                                                                                                                                                                                                                                                                                                                                                                                                                                                                                                                                                                                                                                                                                                                                                                                                                                                                                                                                                                                                                                                                                                                                                                                                                                                                                                                                                                                                                                                                                                                                                                                                                                                                                                                                                                                                                                                                                                                                                                                                                                                          | Kimberley Hospital, National Health Laboratory Services, Northern Cape, South Africa                        | National Institute for Communicable Diseases of the National Health Laboratory Service | Amoako DG, Scheepers C, Mohale T, Ntuli N, Mahlangu B, Ismail A, Bhiman JN                                                                                                                                                                                                                                                            |
| EPI_ISL_1239267, EPI_ISL_1239268, EPI_ISL_1239269, EPI_ISL_1239270, EPI_ISL_1239271, EPI_ISL_1239272, EPI_ISL_1239273, EPI_ISL_1239274, EPI_ISL_1239275, EPI_ISL_1239276, EPI_ISL_1239277, EPI_ISL_1239278, EPI_ISL_1239279, EPI_ISL_1239280, EPI_ISL_1239281, EPI_ISL_1239282, EPI_ISL_1239283, EPI_ISL_1239284, EPI_ISL_1239285, EPI_ISL_1239287, EPI_ISL_1239288, EPI_ISL_1239289, EPI_ISL_1239292, EPI_ISL_1239294, EPI_ISL_1239296, EPI_ISL_1239297, EPI_ISL_1239298, EPI_ISL_1239299, EPI_ISL_1239300, EPI_ISL_1239305, EPI_ISL_1239306, EPI_ISL_1239307, EPI_ISL_1239308, EPI_ISL_1239309, EPI_ISL_1239310, EPI_ISL_1239311, EPI_ISL_1239312, EPI_ISL_1239314, EPI_ISL_1239315, EPI_ISL_1239316, EPI_ISL_1239317                                                                                                                                                                                                                                                                                                                                                                                                                                                                                                                                                                                                                                                                                                                                                                                                                                                                                                                                                                                                                                                                                                                                                                                                                                                                                                                                                                                                                                                                                                                                                                                                                                                                                                                                                                                                                                                                                                                                                                                                                                                                                                                                                                                                                                                                                  | Charlotte Maxeke Johannesburg Academic Hospital, National Health Laboratory Services, Gauteng, South Africa | National Institute for Communicable Diseases of the National Health Laboratory Service | Amoako DG, Scheepers C, Mohale T, Ntuli N, Mahlangu B, Ismail A, Bhiman JN                                                                                                                                                                                                                                                            |
| EPI_ISL_1239330, EPI_ISL_1239331, EPI_ISL_1239332, EPI_ISL_1239333, EPI_ISL_1239334, EPI_ISL_1239335, EPI_ISL_1239336, EPI_ISL_1239337, EPI_ISL_1239338, EPI_ISL_1239339, EPI_ISL_1239340, EPI_ISL_1239341, EPI_ISL_1239342, EPI_ISL_1239343, EPI_ISL_1239344, EPI_ISL_1239345, EPI_ISL_1239346, EPI_ISL_1239347, EPI_ISL_1239348, EPI_ISL_1239349, EPI_ISL_1239350, EPI_ISL_1239351, EPI_ISL_1239352, EPI_ISL_1239353, EPI_ISL_1239354, EPI_ISL_1239355, EPI_ISL_1239356, EPI_ISL_1239357, EPI_ISL_1239360                                                                                                                                                                                                                                                                                                                                                                                                                                                                                                                                                                                                                                                                                                                                                                                                                                                                                                                                                                                                                                                                                                                                                                                                                                                                                                                                                                                                                                                                                                                                                                                                                                                                                                                                                                                                                                                                                                                                                                                                                                                                                                                                                                                                                                                                                                                                                                                                                                                                                              | Chris Hanani Baragwanath Hospital, National Health Laboratory Services, Gauteng, South Africa               | National Institute for Communicable Diseases of the National Health Laboratory Service | Amoako DG, Scheepers C, Mohale T, Ntuli N, Mahlangu B, Ismail A, Bhiman JN                                                                                                                                                                                                                                                            |
| EPI_ISL_1239458                                                                                                                                                                                                                                                                                                                                                                                                                                                                                                                                                                                                                                                                                                                                                                                                                                                                                                                                                                                                                                                                                                                                                                                                                                                                                                                                                                                                                                                                                                                                                                                                                                                                                                                                                                                                                                                                                                                                                                                                                                                                                                                                                                                                                                                                                                                                                                                                                                                                                                                                                                                                                                                                                                                                                                                                                                                                                                                                                                                          | Kimberley Hospital, National Health Laboratory Services, Northern Cape, South Africa                        | National Institute for Communicable Diseases of the National Health Laboratory Service | Amoako DG, Scheepers C, Mohale T, Ntuli N, Mahlangu B, Ismail A, Bhiman JN                                                                                                                                                                                                                                                            |



|                                                                                                                                                                                                                                                                                                                                                                                                                                                                                                                                                                                                                                                                                                                                                                                                                                                                                                                                                                                                                                                                                                                                                                                                                                                                                                                                                                                                                                                                                                                                                                                                                                                              |                                                                                                                             |                                                                                                                                                 |                                                                                                                                                                                                                                                                                                                                                                                                                                                                                                              |                                                                                                                                                                                                                                                                                                                                                                                                                                                                                                              |
|--------------------------------------------------------------------------------------------------------------------------------------------------------------------------------------------------------------------------------------------------------------------------------------------------------------------------------------------------------------------------------------------------------------------------------------------------------------------------------------------------------------------------------------------------------------------------------------------------------------------------------------------------------------------------------------------------------------------------------------------------------------------------------------------------------------------------------------------------------------------------------------------------------------------------------------------------------------------------------------------------------------------------------------------------------------------------------------------------------------------------------------------------------------------------------------------------------------------------------------------------------------------------------------------------------------------------------------------------------------------------------------------------------------------------------------------------------------------------------------------------------------------------------------------------------------------------------------------------------------------------------------------------------------|-----------------------------------------------------------------------------------------------------------------------------|-------------------------------------------------------------------------------------------------------------------------------------------------|--------------------------------------------------------------------------------------------------------------------------------------------------------------------------------------------------------------------------------------------------------------------------------------------------------------------------------------------------------------------------------------------------------------------------------------------------------------------------------------------------------------|--------------------------------------------------------------------------------------------------------------------------------------------------------------------------------------------------------------------------------------------------------------------------------------------------------------------------------------------------------------------------------------------------------------------------------------------------------------------------------------------------------------|
|                                                                                                                                                                                                                                                                                                                                                                                                                                                                                                                                                                                                                                                                                                                                                                                                                                                                                                                                                                                                                                                                                                                                                                                                                                                                                                                                                                                                                                                                                                                                                                                                                                                              | Northern Cape, South Africa                                                                                                 |                                                                                                                                                 | Health Laboratory Service                                                                                                                                                                                                                                                                                                                                                                                                                                                                                    |                                                                                                                                                                                                                                                                                                                                                                                                                                                                                                              |
| EPI_ISL_1239523                                                                                                                                                                                                                                                                                                                                                                                                                                                                                                                                                                                                                                                                                                                                                                                                                                                                                                                                                                                                                                                                                                                                                                                                                                                                                                                                                                                                                                                                                                                                                                                                                                              | Tshepong Hospital, National Health Laboratory Services, North West, South Africa                                            | National Institute for Communicable Diseases of the National Health Laboratory Service                                                          |                                                                                                                                                                                                                                                                                                                                                                                                                                                                                                              | Amoako DG, Scheepers C, Mohale T, Ntuli N, Mahlangu B, Ismail A, Bhiman JN                                                                                                                                                                                                                                                                                                                                                                                                                                   |
| EPI_ISL_1239524                                                                                                                                                                                                                                                                                                                                                                                                                                                                                                                                                                                                                                                                                                                                                                                                                                                                                                                                                                                                                                                                                                                                                                                                                                                                                                                                                                                                                                                                                                                                                                                                                                              | Rob Ferreira Hospital, National Health Laboratory Services, Mpumalanga, South Africa                                        | National Institute for Communicable Diseases of the National Health Laboratory Service                                                          |                                                                                                                                                                                                                                                                                                                                                                                                                                                                                                              | Amoako DG, Scheepers C, Mohale T, Ntuli N, Mahlangu B, Ismail A, Bhiman JN                                                                                                                                                                                                                                                                                                                                                                                                                                   |
| EPI_ISL_1239525, EPI_ISL_1239526                                                                                                                                                                                                                                                                                                                                                                                                                                                                                                                                                                                                                                                                                                                                                                                                                                                                                                                                                                                                                                                                                                                                                                                                                                                                                                                                                                                                                                                                                                                                                                                                                             | Tshepong Hospital, National Health Laboratory Services, North West, South Africa                                            | National Institute for Communicable Diseases of the National Health Laboratory Service                                                          |                                                                                                                                                                                                                                                                                                                                                                                                                                                                                                              | Amoako DG, Scheepers C, Mohale T, Ntuli N, Mahlangu B, Ismail A, Bhiman JN                                                                                                                                                                                                                                                                                                                                                                                                                                   |
| EPI_ISL_1239527                                                                                                                                                                                                                                                                                                                                                                                                                                                                                                                                                                                                                                                                                                                                                                                                                                                                                                                                                                                                                                                                                                                                                                                                                                                                                                                                                                                                                                                                                                                                                                                                                                              | Kimberley Hospital, National Health Laboratory Services, Northern Cape, South Africa                                        | National Institute for Communicable Diseases of the National Health Laboratory Service                                                          |                                                                                                                                                                                                                                                                                                                                                                                                                                                                                                              | Amoako DG, Scheepers C, Mohale T, Ntuli N, Mahlangu B, Ismail A, Bhiman JN                                                                                                                                                                                                                                                                                                                                                                                                                                   |
| EPI_ISL_1239528                                                                                                                                                                                                                                                                                                                                                                                                                                                                                                                                                                                                                                                                                                                                                                                                                                                                                                                                                                                                                                                                                                                                                                                                                                                                                                                                                                                                                                                                                                                                                                                                                                              | Rob Ferreira Hospital, National Health Laboratory Services, Mpumalanga, South Africa                                        | National Institute for Communicable Diseases of the National Health Laboratory Service                                                          |                                                                                                                                                                                                                                                                                                                                                                                                                                                                                                              | Amoako DG, Scheepers C, Mohale T, Ntuli N, Mahlangu B, Ismail A, Bhiman JN                                                                                                                                                                                                                                                                                                                                                                                                                                   |
| EPI_ISL_1239529                                                                                                                                                                                                                                                                                                                                                                                                                                                                                                                                                                                                                                                                                                                                                                                                                                                                                                                                                                                                                                                                                                                                                                                                                                                                                                                                                                                                                                                                                                                                                                                                                                              | Kimberley Hospital, National Health Laboratory Services, Northern Cape, South Africa                                        | National Institute for Communicable Diseases of the National Health Laboratory Service                                                          |                                                                                                                                                                                                                                                                                                                                                                                                                                                                                                              | Amoako DG, Scheepers C, Mohale T, Ntuli N, Mahlangu B, Ismail A, Bhiman JN                                                                                                                                                                                                                                                                                                                                                                                                                                   |
| EPI_ISL_1239530                                                                                                                                                                                                                                                                                                                                                                                                                                                                                                                                                                                                                                                                                                                                                                                                                                                                                                                                                                                                                                                                                                                                                                                                                                                                                                                                                                                                                                                                                                                                                                                                                                              | Rob Ferreira Hospital, National Health Laboratory Services, Mpumalanga, South Africa                                        | National Institute for Communicable Diseases of the National Health Laboratory Service                                                          |                                                                                                                                                                                                                                                                                                                                                                                                                                                                                                              | Amoako DG, Scheepers C, Mohale T, Ntuli N, Mahlangu B, Ismail A, Bhiman JN                                                                                                                                                                                                                                                                                                                                                                                                                                   |
| EPI_ISL_1239531                                                                                                                                                                                                                                                                                                                                                                                                                                                                                                                                                                                                                                                                                                                                                                                                                                                                                                                                                                                                                                                                                                                                                                                                                                                                                                                                                                                                                                                                                                                                                                                                                                              | Kimberley Hospital, National Health Laboratory Services, Northern Cape, South Africa                                        | National Institute for Communicable Diseases of the National Health Laboratory Service                                                          |                                                                                                                                                                                                                                                                                                                                                                                                                                                                                                              | Amoako DG, Scheepers C, Mohale T, Ntuli N, Mahlangu B, Ismail A, Bhiman JN                                                                                                                                                                                                                                                                                                                                                                                                                                   |
| EPI_ISL_1239850, EPI_ISL_1239851, EPI_ISL_1239852, EPI_ISL_1239853, EPI_ISL_1239854, EPI_ISL_1239855, EPI_ISL_1239856, EPI_ISL_1239857, EPI_ISL_1239858, EPI_ISL_1239859, EPI_ISL_1239860, EPI_ISL_1239861, EPI_ISL_1239862, EPI_ISL_1239863, EPI_ISL_1239864, EPI_ISL_1239865, EPI_ISL_1239866, EPI_ISL_1239867, EPI_ISL_1239868, EPI_ISL_1239869, EPI_ISL_1239870, EPI_ISL_1239871, EPI_ISL_1239872, EPI_ISL_1239873, EPI_ISL_1239874, EPI_ISL_1239875, EPI_ISL_1239876, EPI_ISL_1239877, EPI_ISL_1239878, EPI_ISL_1239879, EPI_ISL_1239880, EPI_ISL_1239881, EPI_ISL_1239882                                                                                                                                                                                                                                                                                                                                                                                                                                                                                                                                                                                                                                                                                                                                                                                                                                                                                                                                                                                                                                                                              | National Institute for Communicable Diseases.National Health Laboratory Services, Gauteng, South Africa                     | National Institute for Communicable Diseases of the National Health Laboratory Service                                                          | Amoako DG, Scheepers C, Mohale T, Ntuli N, Mahlangu B, Ismail A, Bhiman JN                                                                                                                                                                                                                                                                                                                                                                                                                                   |                                                                                                                                                                                                                                                                                                                                                                                                                                                                                                              |
| see above                                                                                                                                                                                                                                                                                                                                                                                                                                                                                                                                                                                                                                                                                                                                                                                                                                                                                                                                                                                                                                                                                                                                                                                                                                                                                                                                                                                                                                                                                                                                                                                                                                                    | National Institute for Communicable Diseases.National Health Laboratory Services, Gauteng, South Africa                     | National Institute for Communicable Diseases of the National Health Laboratory Service                                                          |                                                                                                                                                                                                                                                                                                                                                                                                                                                                                                              | Amoako DG, Scheepers C, Mohale T, Ntuli N, Mahlangu B, Ismail A, Bhiman JN                                                                                                                                                                                                                                                                                                                                                                                                                                   |
| EPI_ISL_1250424, EPI_ISL_1250425, EPI_ISL_1250427, EPI_ISL_1250428, EPI_ISL_1250430, EPI_ISL_1250431, EPI_ISL_1250432, EPI_ISL_1250434, EPI_ISL_1250436, EPI_ISL_1250437, EPI_ISL_1250439, EPI_ISL_1250441, EPI_ISL_1250442, EPI_ISL_1250444, EPI_ISL_1250446, EPI_ISL_1250447, EPI_ISL_1250448, EPI_ISL_1250450, EPI_ISL_1250452, EPI_ISL_1250453, EPI_ISL_1250455, EPI_ISL_1250456, EPI_ISL_1250458, EPI_ISL_1250460, EPI_ISL_1250462, EPI_ISL_1250463, EPI_ISL_1250465, EPI_ISL_1250466, EPI_ISL_1250468, EPI_ISL_1250469, EPI_ISL_1250472, EPI_ISL_1250474, EPI_ISL_1250476, EPI_ISL_1250477, EPI_ISL_1250479, EPI_ISL_1250480, EPI_ISL_1250482, EPI_ISL_1250483, EPI_ISL_1250485, EPI_ISL_1250486, EPI_ISL_1250488, EPI_ISL_1250490, EPI_ISL_1250491, EPI_ISL_1250493, EPI_ISL_1250494, EPI_ISL_1250496, EPI_ISL_1250497, EPI_ISL_1250499, EPI_ISL_1250501, EPI_ISL_1250502, EPI_ISL_1250504, EPI_ISL_1250505                                                                                                                                                                                                                                                                                                                                                                                                                                                                                                                                                                                                                                                                                                                                           | National Health Laboratory Service, South Africa                                                                            | KRISP, KZN Research Innovation and Sequencing Platform                                                                                          | Giandhari J, Pillay S, Maslo C, Sitharam L, Llessells R, Mdlalose K, York D, Khan S, Emmanuel SJ, Tegally H, Wilkinson E, de Oliveira T                                                                                                                                                                                                                                                                                                                                                                      |                                                                                                                                                                                                                                                                                                                                                                                                                                                                                                              |
| EPI_ISL_1250507, EPI_ISL_1250509, EPI_ISL_1250512, EPI_ISL_1250514, EPI_ISL_1250515, EPI_ISL_1250517, EPI_ISL_1250520, EPI_ISL_1250522, EPI_ISL_1250523, EPI_ISL_1250525, EPI_ISL_1250526, EPI_ISL_1250528, EPI_ISL_1250529, EPI_ISL_1250531, EPI_ISL_1250533, EPI_ISL_1250535, EPI_ISL_1250537, EPI_ISL_1250538, EPI_ISL_1250540, EPI_ISL_1250542, EPI_ISL_1250543, EPI_ISL_1250545, EPI_ISL_1250547, EPI_ISL_1250548, EPI_ISL_1250550, EPI_ISL_1250551                                                                                                                                                                                                                                                                                                                                                                                                                                                                                                                                                                                                                                                                                                                                                                                                                                                                                                                                                                                                                                                                                                                                                                                                     | National Health Laboratory Service, South Africa                                                                            | KRISP, KZN Research Innovation and Sequencing Platform                                                                                          |                                                                                                                                                                                                                                                                                                                                                                                                                                                                                                              | Giandhari J, Pillay S, Maslo C, Sitharam L, Llessells R, Mdlalose K, York D, Khan S, Emmanuel SJ, Tegally H, Wilkinson E, de Oliveira T                                                                                                                                                                                                                                                                                                                                                                      |
| see above                                                                                                                                                                                                                                                                                                                                                                                                                                                                                                                                                                                                                                                                                                                                                                                                                                                                                                                                                                                                                                                                                                                                                                                                                                                                                                                                                                                                                                                                                                                                                                                                                                                    | Molecular Diagnostics Services (MDS)                                                                                        | KRISP, KZN Research Innovation and Sequencing Platform                                                                                          |                                                                                                                                                                                                                                                                                                                                                                                                                                                                                                              | Giandhari J, Pillay S, Maslo C, Sitharam L, Llessells R, Mdlalose K, York D, Khan S, Emmanuel SJ, Tegally H, Wilkinson E, de Oliveira T                                                                                                                                                                                                                                                                                                                                                                      |
| EPI_ISL_1255105                                                                                                                                                                                                                                                                                                                                                                                                                                                                                                                                                                                                                                                                                                                                                                                                                                                                                                                                                                                                                                                                                                                                                                                                                                                                                                                                                                                                                                                                                                                                                                                                                                              | West African Centre for Cell Biology of Infectious Pathogens (WACCBIP), University of Ghana, Volta Road, Legon-Accra, Ghana | West African Centre for Cell Biology of Infectious Pathogens (WACCBIP), University of Ghana, Volta Road, Legon-Accra, Ghana                     |                                                                                                                                                                                                                                                                                                                                                                                                                                                                                                              | Collins M. Morang'a, Joyce M. Ngoi, Evelyn B. Quansah, Samirah Saidi, Dominic S.Y. Amuzu, Vincent Appiah, Philip M. Soglo, Vanessa Magnussen, Aisha Mohammed, Kesego Tapela, Nelson Kibinge, Abdoulaye B Diallo, Frederick Kumi-Ansah, Theophilus Odoom, Oliver D Boakye5, Emmanuella Amoako4, Abdul-Karim Abass, Samuel Kaba Akoriyea, Frederick Tei-Maya, Lucas N. Amenga-Etego, Dam Kenneth Mbit, Yaw Bediako, Benjamin Demah Nuertey, Gordon A Awandare, Peter K Quashie, Gordon A Awandare, Yaw Bediako |
| EPI_ISL_1255106, EPI_ISL_1255107, EPI_ISL_1255108, EPI_ISL_1255109, EPI_ISL_1255110, EPI_ISL_1255111, EPI_ISL_1255112, EPI_ISL_1255113, EPI_ISL_1255114, EPI_ISL_1255115, EPI_ISL_1255116, EPI_ISL_1255117, EPI_ISL_1255118, EPI_ISL_1255119, EPI_ISL_1255142, EPI_ISL_1255143, EPI_ISL_1255145, EPI_ISL_1255146, EPI_ISL_1255147, EPI_ISL_1255148, EPI_ISL_1255149, EPI_ISL_1255150, EPI_ISL_1255151, EPI_ISL_1255152, EPI_ISL_1255153, EPI_ISL_1255154, EPI_ISL_1255155, EPI_ISL_1255156, EPI_ISL_1255163, EPI_ISL_1255166, EPI_ISL_1255167, EPI_ISL_1255168, EPI_ISL_1255169, EPI_ISL_1255170, EPI_ISL_1255171, EPI_ISL_1255172, EPI_ISL_1255173, EPI_ISL_1255174, EPI_ISL_1255175, EPI_ISL_1255176, EPI_ISL_1255177, EPI_ISL_1255178, EPI_ISL_1255179, EPI_ISL_1255180, EPI_ISL_1255181, EPI_ISL_1255182, EPI_ISL_1255183, EPI_ISL_1255186, EPI_ISL_1255187, EPI_ISL_1255188, EPI_ISL_1255189, EPI_ISL_1255190, EPI_ISL_1255191, EPI_ISL_1255192, EPI_ISL_1255193, EPI_ISL_1255194, EPI_ISL_1255195, EPI_ISL_1255196, EPI_ISL_1255199, EPI_ISL_1255200, EPI_ISL_1255228, EPI_ISL_1255230, EPI_ISL_1255231, EPI_ISL_1255232, EPI_ISL_1255233, EPI_ISL_1255234, EPI_ISL_1255235, EPI_ISL_1255236, EPI_ISL_1255237, EPI_ISL_1255238, EPI_ISL_1255239, EPI_ISL_1255240, EPI_ISL_1255241, EPI_ISL_1255242, EPI_ISL_1255243, EPI_ISL_1255244, EPI_ISL_1255245, EPI_ISL_1255246, EPI_ISL_1255247, EPI_ISL_1255248, EPI_ISL_1255249, EPI_ISL_1255250, EPI_ISL_1255251, EPI_ISL_1255252, EPI_ISL_1255253, EPI_ISL_1255254, EPI_ISL_1255255, EPI_ISL_1255256, EPI_ISL_1255257, EPI_ISL_1255258, EPI_ISL_1255259, EPI_ISL_1255260, EPI_ISL_1255262, EPI_ISL_1255263 | West African Centre for Cell Biology of Infectious Pathogens (WACCBIP), University of Ghana, Accra, Ghana                   | West African Centre for Cell Biology of Infectious Pathogens (WACCBIP), University of Ghana, Volta Road, Legon-Accra, Ghana                     | Collins M. Morang'a, Joyce M. Ngoi, Evelyn B. Quansah, Samirah Saidi, Dominic S.Y. Amuzu, Vincent Appiah, Philip M. Soglo, Vanessa Magnussen, Aisha Mohammed, Kesego Tapela, Nelson Kibinge, Abdoulaye B Diallo, Frederick Kumi-Ansah, Theophilus Odoom, Oliver D Boakye5, Emmanuella Amoako4, Abdul-Karim Abass, Samuel Kaba Akoriyea, Frederick Tei-Maya, Lucas N. Amenga-Etego, Dam Kenneth Mbit, Yaw Bediako, Benjamin Demah Nuertey, Gordon A Awandare, Peter K Quashie, Gordon A Awandare, Yaw Bediako |                                                                                                                                                                                                                                                                                                                                                                                                                                                                                                              |
| EPI_ISL_1257874, EPI_ISL_1257875, EPI_ISL_1257876                                                                                                                                                                                                                                                                                                                                                                                                                                                                                                                                                                                                                                                                                                                                                                                                                                                                                                                                                                                                                                                                                                                                                                                                                                                                                                                                                                                                                                                                                                                                                                                                            | Centre Pasteur du Cameroun                                                                                                  | Institut Pasteur de Dakar                                                                                                                       |                                                                                                                                                                                                                                                                                                                                                                                                                                                                                                              | Njoum Richard, Digne Moussa Moïse, Dia Ndongo, Diallo Amadou, Sankhe Safietou, Diop Mamadou, Loucoubar Cheikh, Elisabeth Carniel, Faye Ousmane, Sall Amadou Alpha                                                                                                                                                                                                                                                                                                                                            |
| EPI_ISL_1261701, EPI_ISL_1261704, EPI_ISL_1261705, EPI_ISL_1261706, EPI_ISL_1261708, EPI_ISL_1261712, EPI_ISL_1261713, EPI_ISL_1261715, EPI_ISL_1261719, EPI_ISL_1261720, EPI_ISL_1261726, EPI_ISL_1261730, EPI_ISL_1261731, EPI_ISL_1261735, EPI_ISL_1261736, EPI_ISL_1261737, EPI_ISL_1261746, EPI_ISL_1261751, EPI_ISL_1261752, EPI_ISL_1261753                                                                                                                                                                                                                                                                                                                                                                                                                                                                                                                                                                                                                                                                                                                                                                                                                                                                                                                                                                                                                                                                                                                                                                                                                                                                                                           | Centre Pasteur du Cameroun                                                                                                  | Institut Pasteur de Dakar                                                                                                                       |                                                                                                                                                                                                                                                                                                                                                                                                                                                                                                              | Njoum Richard, Digne Moussa Moïse, Dia Ndongo, Diallo Amadou, Sankhe Safietou, Diop Mamadou, Loucoubar Cheikh, Elisabeth Carniel, Faye Ousmane, Sall Amadou Alpha                                                                                                                                                                                                                                                                                                                                            |
| see above                                                                                                                                                                                                                                                                                                                                                                                                                                                                                                                                                                                                                                                                                                                                                                                                                                                                                                                                                                                                                                                                                                                                                                                                                                                                                                                                                                                                                                                                                                                                                                                                                                                    | Iressef Genomics lab                                                                                                        | IRESEEF                                                                                                                                         |                                                                                                                                                                                                                                                                                                                                                                                                                                                                                                              | Souleymane MBOUP, Abdou PADANE, Abdoulie KANTEH ,Abdul Karim SESAY , Khadim GUEYE, Papa Alassane DIAW, Birahim Piere NDIAYE, Barada Cisse, Aminata MBOUP, Mostapha MBOU, Ndeye Coumba Toure KANE, Nafisatou LEYE, Gora LO, Ambrose AHOUIDI , Astou Gaye GAYE, Aminata DIA, Yacine DIA                                                                                                                                                                                                                        |
| EPI_ISL_1272301, EPI_ISL_1272307                                                                                                                                                                                                                                                                                                                                                                                                                                                                                                                                                                                                                                                                                                                                                                                                                                                                                                                                                                                                                                                                                                                                                                                                                                                                                                                                                                                                                                                                                                                                                                                                                             | NHLS Universitas Academic                                                                                                   | UFS Virology                                                                                                                                    |                                                                                                                                                                                                                                                                                                                                                                                                                                                                                                              | PA Bester, MM Nyaga, P Nthiga, MT Mogotsi, Emmanuel Ogunbayo, D Goedhals, T de Oliveira                                                                                                                                                                                                                                                                                                                                                                                                                      |
| EPI_ISL_1273103                                                                                                                                                                                                                                                                                                                                                                                                                                                                                                                                                                                                                                                                                                                                                                                                                                                                                                                                                                                                                                                                                                                                                                                                                                                                                                                                                                                                                                                                                                                                                                                                                                              | Department of Microbial Biotechnology, Genetic Engineering Division, National Research Centre                               | Department of Microbial Biotechnology, Genetic Engineering Division, National Research Centre                                                   |                                                                                                                                                                                                                                                                                                                                                                                                                                                                                                              | Dawood.R.M., Khalifa,M.K., Taha,A.G., Farghaly,A., Fikry,A.E. and Shemis,M.                                                                                                                                                                                                                                                                                                                                                                                                                                  |
| EPI_ISL_1273391, EPI_ISL_1273392, EPI_ISL_1273393, EPI_ISL_1273394, EPI_ISL_1273395                                                                                                                                                                                                                                                                                                                                                                                                                                                                                                                                                                                                                                                                                                                                                                                                                                                                                                                                                                                                                                                                                                                                                                                                                                                                                                                                                                                                                                                                                                                                                                          | National Reference Laboratory - Ministry of Health Maseru Lesotho                                                           | National Institute for Communicable Diseases of the National Health Laboratory Service                                                          |                                                                                                                                                                                                                                                                                                                                                                                                                                                                                                              | Gorova V, Mathabo M, Mooko M, Banda R, Amoako DG, Scheepers C, Mohale T, Ntuli N, Mahlangu B, Ismail A, Bhiman JN                                                                                                                                                                                                                                                                                                                                                                                            |
| EPI_ISL_1293351                                                                                                                                                                                                                                                                                                                                                                                                                                                                                                                                                                                                                                                                                                                                                                                                                                                                                                                                                                                                                                                                                                                                                                                                                                                                                                                                                                                                                                                                                                                                                                                                                                              | Institut National d'Hygiène (INH)                                                                                           | Unité Mixte Internationale TransVIHMI (UMI 233 IRD - U1175 INSERM - Université de Montpellier)IRD (Institut de recherche pour le développement) |                                                                                                                                                                                                                                                                                                                                                                                                                                                                                                              | Mounerou SALOU, Christelle BUTEL, Wembo A. HALATOKO,Issaka Maman, Abia A. KONOU, Amivi EHLAN, Adodo SADJI, Kokou TEGUENI,Sidonie A.M.KAGNISSODE, Akoélé SILIADIN, Alassane OURO-MEDEL, Messanh DOUFFAN,Déléma MABA,Sika DOSSIM, Améyo DORKENOO, Mireille PRINCE-DAVID,Anoumou DAGNRA,Laetitia SERRANO,Ahidjo AYOUNBA,Eric DELAPORTE, Martine PEETERS                                                                                                                                                         |
| EPI_ISL_1299491, EPI_ISL_1299492, EPI_ISL_1299493, EPI_ISL_1299494, EPI_ISL_1299495                                                                                                                                                                                                                                                                                                                                                                                                                                                                                                                                                                                                                                                                                                                                                                                                                                                                                                                                                                                                                                                                                                                                                                                                                                                                                                                                                                                                                                                                                                                                                                          | Centre Hospitalo Universitaire Souru Sanou                                                                                  | Centre Muraz                                                                                                                                    |                                                                                                                                                                                                                                                                                                                                                                                                                                                                                                              | Arsène Zongo, Ange Badjo, Yacouba Sawadogo, Jasmin Schlotterbeck, Essia Belarbi, Grit Schubert, Fabian Leendertz, Abdoul-Salam Ouedraogo, Thérèse Kagone, Arsène Somé, Firmin Kaboré, Armel Poda, Soumeya Ouangraoua                                                                                                                                                                                                                                                                                         |
| EPI_ISL_1299497, EPI_ISL_1299498                                                                                                                                                                                                                                                                                                                                                                                                                                                                                                                                                                                                                                                                                                                                                                                                                                                                                                                                                                                                                                                                                                                                                                                                                                                                                                                                                                                                                                                                                                                                                                                                                             | CMA Danu                                                                                                                    | Centre Muraz                                                                                                                                    |                                                                                                                                                                                                                                                                                                                                                                                                                                                                                                              | Arsène Zongo, Ange Badjo, Yacouba Sawadogo, Jasmin Schlotterbeck, Essia Belarbi, Grit Schubert, Fabian Leendertz, Abdoul-Salam Ouedraogo, Thérèse Kagone, Arsène Somé, Firmin Kaboré, Armel Poda, Soumeya Ouangraoua                                                                                                                                                                                                                                                                                         |
| EPI_ISL_1300662, EPI_ISL_1301761, EPI_ISL_1301762, EPI_ISL_1301763, EPI_ISL_1301765, EPI_ISL_1301766, EPI_ISL_1301767, EPI_ISL_1301768, EPI_ISL_1301769, EPI_ISL_1301770, EPI_ISL_1301798, EPI_ISL_1301799, EPI_ISL_1302681                                                                                                                                                                                                                                                                                                                                                                                                                                                                                                                                                                                                                                                                                                                                                                                                                                                                                                                                                                                                                                                                                                                                                                                                                                                                                                                                                                                                                                  | Nucleic Acid Testing, National Reference Laboratory                                                                         | GIGA Medical Genomics                                                                                                                           |                                                                                                                                                                                                                                                                                                                                                                                                                                                                                                              | Yvan Butera, Keith Durkin, Maria Artesi, Bouchra Boujemla, Robert Rutayisire, Patrick Tuisange, Esperence Umumarungu, Sébastien Bontems, Marie-Pierre Hayette, Nathalie Renotte, Swaibu Gatare, Jacob Souppgui, Sabin Nsanzimana, Vincent Bours, Léon Mutesa                                                                                                                                                                                                                                                 |
| EPI_ISL_1303031                                                                                                                                                                                                                                                                                                                                                                                                                                                                                                                                                                                                                                                                                                                                                                                                                                                                                                                                                                                                                                                                                                                                                                                                                                                                                                                                                                                                                                                                                                                                                                                                                                              | Institut National d'Hygiène (INH)                                                                                           | Unité Mixte Internationale TransVIHMI (UMI 233 IRD - U1175 INSERM - Université de Montpellier)IRD (Institut de recherche pour le développement) |                                                                                                                                                                                                                                                                                                                                                                                                                                                                                                              | Mounerou SALOU, Christelle BUTEL, Wembo A. HALATOKO,Issaka Maman, Abia A. KONOU, Amivi EHLAN, Adodo SADJI, Kokou TEGUENI,Sidonie A.M.KAGNISSODE, Akoélé SILIADIN, Alassane OURO-MEDEL, Messanh DOUFFAN,Déléma MABA,Sika DOSSIM, Améyo DORKENOO, Mireille PRINCE-DAVID,Anoumou DAGNRA,Laetitia SERRANO,Ahidjo AYOUNBA,Eric DELAPORTE, Martine PEETERS                                                                                                                                                         |
| EPI_ISL_1305818                                                                                                                                                                                                                                                                                                                                                                                                                                                                                                                                                                                                                                                                                                                                                                                                                                                                                                                                                                                                                                                                                                                                                                                                                                                                                                                                                                                                                                                                                                                                                                                                                                              | National Health Laboratory Services                                                                                         | National Health Laboratory Services                                                                                                             |                                                                                                                                                                                                                                                                                                                                                                                                                                                                                                              | Mushal Ali, Thabo Mohale, Kathleen Subramoney                                                                                                                                                                                                                                                                                                                                                                                                                                                                |
| EPI_ISL_1315064                                                                                                                                                                                                                                                                                                                                                                                                                                                                                                                                                                                                                                                                                                                                                                                                                                                                                                                                                                                                                                                                                                                                                                                                                                                                                                                                                                                                                                                                                                                                                                                                                                              | Armed Forces Medical Research Laboratories and Blood                                                                        | Department of Microbial Biotechnology, Genetic Engineering                                                                                      |                                                                                                                                                                                                                                                                                                                                                                                                                                                                                                              | Reham Dawood, Mohamed Khalifa, Ahmed Taha, Ayman Farghaly, Ahmed Elsayed, Mohamed Shemis                                                                                                                                                                                                                                                                                                                                                                                                                     |

|                                                                                                                                                                                                                                                                                                                                                                                                                                                                                                                                                                                                                                                                                                                                                                                                                                                                                                                                                                                                                                                                                                                                                                                                                                                                                                                                                                                                                                                                                                                                                                                                                                                                                                                                                                                                                                                                                           |                                                                                                                      |                                                                                                                                                    |  |                                                                                                                                                                                                                                                                                                                                                                                             |
|-------------------------------------------------------------------------------------------------------------------------------------------------------------------------------------------------------------------------------------------------------------------------------------------------------------------------------------------------------------------------------------------------------------------------------------------------------------------------------------------------------------------------------------------------------------------------------------------------------------------------------------------------------------------------------------------------------------------------------------------------------------------------------------------------------------------------------------------------------------------------------------------------------------------------------------------------------------------------------------------------------------------------------------------------------------------------------------------------------------------------------------------------------------------------------------------------------------------------------------------------------------------------------------------------------------------------------------------------------------------------------------------------------------------------------------------------------------------------------------------------------------------------------------------------------------------------------------------------------------------------------------------------------------------------------------------------------------------------------------------------------------------------------------------------------------------------------------------------------------------------------------------|----------------------------------------------------------------------------------------------------------------------|----------------------------------------------------------------------------------------------------------------------------------------------------|--|---------------------------------------------------------------------------------------------------------------------------------------------------------------------------------------------------------------------------------------------------------------------------------------------------------------------------------------------------------------------------------------------|
|                                                                                                                                                                                                                                                                                                                                                                                                                                                                                                                                                                                                                                                                                                                                                                                                                                                                                                                                                                                                                                                                                                                                                                                                                                                                                                                                                                                                                                                                                                                                                                                                                                                                                                                                                                                                                                                                                           | Bank, Egypt                                                                                                          | Division, National Research Centre,                                                                                                                |  |                                                                                                                                                                                                                                                                                                                                                                                             |
| EPI_ISL_1315065                                                                                                                                                                                                                                                                                                                                                                                                                                                                                                                                                                                                                                                                                                                                                                                                                                                                                                                                                                                                                                                                                                                                                                                                                                                                                                                                                                                                                                                                                                                                                                                                                                                                                                                                                                                                                                                                           | Armed Forces Medical Research Laboratories and Blood Bank, Egypt                                                     | Department of Microbial Biotechnology, Genetic Engineering Division, National Research Centre                                                      |  | Reham Dawood, Mohamed Khalifa, Ahmed Taha, Ayman Farghaly, Ahmed Elsayed, Mohamed Shemis                                                                                                                                                                                                                                                                                                    |
| EPI_ISL_1321604                                                                                                                                                                                                                                                                                                                                                                                                                                                                                                                                                                                                                                                                                                                                                                                                                                                                                                                                                                                                                                                                                                                                                                                                                                                                                                                                                                                                                                                                                                                                                                                                                                                                                                                                                                                                                                                                           | Institut National d'Hygiène (INH)                                                                                    | Unité Mixte Internationale TransVIHMI (UMI 233 IRD - U1175 INSERM - Université de Montpellier)IRD (Institut de recherche pour le développement)    |  | Mounerou SALOU, Christelle BUTEL, Wembo A. HALATOKO,Issaka Maman, Abia A. KONOU, Amivi EHLAN, Adodo SADJI, Kokou TEGUENI,Sidonie A.M.KAGNISSODE, Akoélé SILIADIN, Alassane OURO-MEDEL, Messanh DOUFFAN,Déléma MABA,Sika DOSSIM, Améyo DORKENOO, Mireille PRINCE-DAVID,Anoumou DAGNRA,Laetitia SERRANO,Ahidjo AYOUBA,Eric DELAPORTE, Martine PEETERS                                         |
| EPI_ISL_1324121, EPI_ISL_1324122, EPI_ISL_1324123, EPI_ISL_1324124, EPI_ISL_1324125, EPI_ISL_1324126, EPI_ISL_1324127, EPI_ISL_1324129, EPI_ISL_1324130, EPI_ISL_1324131                                                                                                                                                                                                                                                                                                                                                                                                                                                                                                                                                                                                                                                                                                                                                                                                                                                                                                                                                                                                                                                                                                                                                                                                                                                                                                                                                                                                                                                                                                                                                                                                                                                                                                                  | UW Virology Lab                                                                                                      | UW Virology Lab                                                                                                                                    |  | Pavitra Roychoudhury, Hong Xie, Lasata Shrestha, Shah Mohamed Bakhsh, Michelle Lin, Margaret Mills, Noah Baker, Sean Ellis, Saraswathi Sathees, Meeli-Huang, Keith R Jerome, Alexander Greninger                                                                                                                                                                                            |
| EPI_ISL_1347896, EPI_ISL_1347897, EPI_ISL_1347898, EPI_ISL_1347933, EPI_ISL_1347934, EPI_ISL_1347935, EPI_ISL_1347936, EPI_ISL_1347937                                                                                                                                                                                                                                                                                                                                                                                                                                                                                                                                                                                                                                                                                                                                                                                                                                                                                                                                                                                                                                                                                                                                                                                                                                                                                                                                                                                                                                                                                                                                                                                                                                                                                                                                                    | Instituto Nacional de Investigação em Saúde                                                                          | KRISP, KZN Research Innovation and Sequencing Platform                                                                                             |  | Morais J, Neto Z, Afonso P, Miranda J, David K, Inglês L, Pereira A, Paulo A Carralero RR Paixão JP, Freitas RH, Mufinda M, Lutucuta S, Giandhari J, Pillay S, Naidoo Y, Emmanuel SJ, Tegally H, Wilkinson E, de Oliveira T                                                                                                                                                                 |
| EPI_ISL_1357597                                                                                                                                                                                                                                                                                                                                                                                                                                                                                                                                                                                                                                                                                                                                                                                                                                                                                                                                                                                                                                                                                                                                                                                                                                                                                                                                                                                                                                                                                                                                                                                                                                                                                                                                                                                                                                                                           | Centre For Biotechnology Research And Development                                                                    | THE AFRICA GENOMICS CENTRE AND CONSULTANCY LIMITED                                                                                                 |  | Damaris Matoke-Muhia, George Michuki, Cecilia Waruhiu, Adede Hawi, Lilian Kanjau, John Njuguna, Ravena Mubichi                                                                                                                                                                                                                                                                              |
| EPI_ISL_1357599                                                                                                                                                                                                                                                                                                                                                                                                                                                                                                                                                                                                                                                                                                                                                                                                                                                                                                                                                                                                                                                                                                                                                                                                                                                                                                                                                                                                                                                                                                                                                                                                                                                                                                                                                                                                                                                                           | Centre For Biotechnology Research And Development                                                                    | THE AFRICA GENOMICS CENTRE AND CONSULTANCY                                                                                                         |  | Damaris Matoke Muhia, George Michuki, Cecilia Waruhiu, Adede Hawi, Lilian Kanjau, John Njuguna, Ravena Mubichi                                                                                                                                                                                                                                                                              |
| EPI_ISL_1357601, EPI_ISL_1357603, EPI_ISL_1357604                                                                                                                                                                                                                                                                                                                                                                                                                                                                                                                                                                                                                                                                                                                                                                                                                                                                                                                                                                                                                                                                                                                                                                                                                                                                                                                                                                                                                                                                                                                                                                                                                                                                                                                                                                                                                                         | Centre For Biotechnology Research And Development                                                                    | THE AFRICA GENOMICS CENTRE AND CONSULTANCY                                                                                                         |  | Damaris Matoke-Muhia, George Michuki, Cecilia Waruhiu, Adede Hawi, Lilian Kanjau, John Njuguna, Ravena Mubichi                                                                                                                                                                                                                                                                              |
| EPI_ISL_1363124, EPI_ISL_1363125, EPI_ISL_1363126, EPI_ISL_1363127, EPI_ISL_1363128, EPI_ISL_1363129, EPI_ISL_1363130, EPI_ISL_1363131, EPI_ISL_1363132, EPI_ISL_1363133, EPI_ISL_1363134, EPI_ISL_1363135, EPI_ISL_1363136, EPI_ISL_1363137, EPI_ISL_1363138, EPI_ISL_1363139, EPI_ISL_1363140, EPI_ISL_1363141, EPI_ISL_1363142, EPI_ISL_1363143, EPI_ISL_1363144, EPI_ISL_1363145, EPI_ISL_1363146, EPI_ISL_1363147, EPI_ISL_1363148, EPI_ISL_1363149, EPI_ISL_1363150                                                                                                                                                                                                                                                                                                                                                                                                                                                                                                                                                                                                                                                                                                                                                                                                                                                                                                                                                                                                                                                                                                                                                                                                                                                                                                                                                                                                                 |                                                                                                                      |                                                                                                                                                    |  |                                                                                                                                                                                                                                                                                                                                                                                             |
| see above                                                                                                                                                                                                                                                                                                                                                                                                                                                                                                                                                                                                                                                                                                                                                                                                                                                                                                                                                                                                                                                                                                                                                                                                                                                                                                                                                                                                                                                                                                                                                                                                                                                                                                                                                                                                                                                                                 | National Health Laboratory Services                                                                                  | National Health Laboratory Services                                                                                                                |  | Kathleen Subramoney, Florette Treurnicht, Arshad Ismail                                                                                                                                                                                                                                                                                                                                     |
| EPI_ISL_1367697                                                                                                                                                                                                                                                                                                                                                                                                                                                                                                                                                                                                                                                                                                                                                                                                                                                                                                                                                                                                                                                                                                                                                                                                                                                                                                                                                                                                                                                                                                                                                                                                                                                                                                                                                                                                                                                                           | Molecular diagnostic unit for viral haemorrhagic fevers and emerging viruses, Bouaké CHU Laboratory                  | Molecular diagnostic unit for viral haemorrhagic fevers and emerging viruses, Bouaké CHU Laboratory                                                |  | Chantal Akoua-Koffi, Diané Bamourou, Etié Aneh, Oby Wayoro, Safiatou Karidioula, Adjaratou Traoré, Soundélé Maïté, Monemo Pacome, Coulibaly Mbegan, Bamba Fatoumata Touré, Kra Oufofé, Grit Schubert, Essia Belarbi, Fabian Leendertz                                                                                                                                                       |
| EPI_ISL_1372562, EPI_ISL_1372563                                                                                                                                                                                                                                                                                                                                                                                                                                                                                                                                                                                                                                                                                                                                                                                                                                                                                                                                                                                                                                                                                                                                                                                                                                                                                                                                                                                                                                                                                                                                                                                                                                                                                                                                                                                                                                                          | National Health Laboratory Services                                                                                  | National Health Laboratory Services                                                                                                                |  | Kathleen Subramoney, Florette Treurnicht, Arshad Ismail                                                                                                                                                                                                                                                                                                                                     |
| EPI_ISL_1373589, EPI_ISL_1373590, EPI_ISL_1373591, EPI_ISL_1373592, EPI_ISL_1373593, EPI_ISL_1373594, EPI_ISL_1373595, EPI_ISL_1373596, EPI_ISL_1373597, EPI_ISL_1373598, EPI_ISL_1373599, EPI_ISL_1373600, EPI_ISL_1373601                                                                                                                                                                                                                                                                                                                                                                                                                                                                                                                                                                                                                                                                                                                                                                                                                                                                                                                                                                                                                                                                                                                                                                                                                                                                                                                                                                                                                                                                                                                                                                                                                                                               |                                                                                                                      |                                                                                                                                                    |  | Mushal Ali, Thabo Mohale, Kathleen Subramoney                                                                                                                                                                                                                                                                                                                                               |
| see above                                                                                                                                                                                                                                                                                                                                                                                                                                                                                                                                                                                                                                                                                                                                                                                                                                                                                                                                                                                                                                                                                                                                                                                                                                                                                                                                                                                                                                                                                                                                                                                                                                                                                                                                                                                                                                                                                 | National Health Laboratory Services                                                                                  | National Health Laboratory Services                                                                                                                |  |                                                                                                                                                                                                                                                                                                                                                                                             |
| EPI_ISL_1404615                                                                                                                                                                                                                                                                                                                                                                                                                                                                                                                                                                                                                                                                                                                                                                                                                                                                                                                                                                                                                                                                                                                                                                                                                                                                                                                                                                                                                                                                                                                                                                                                                                                                                                                                                                                                                                                                           | Institut National d'Hygiène                                                                                          | Unité Mixte Internationale TransVIHMI (UMI 233 IRD - U1175 INSERM - Université de Montpellier) IRD (Institut de recherche pour le développement)   |  | Mounerou SALOU, Christelle BUTEL, Wembo A. HALATOKO,Issaka Maman, Abia A. KONOU, Amivi EHLAN, Adodo SADJI, Kokou TEGUENI,Sidonie A.M.KAGNISSODE, Akoélé SILIADIN, Alassane OURO-MEDEL, Messanh DOUFFAN,Déléma MABA,Sika DOSSIM, Améyo DORKENOO, Mireille PRINCE-DAVID,Anoumou DAGNRA,Laetitia SERRANO,Ahidjo AYOUBA,Eric DELAPORTE, Martine PEETERS                                         |
| EPI_ISL_1406144, EPI_ISL_1406177                                                                                                                                                                                                                                                                                                                                                                                                                                                                                                                                                                                                                                                                                                                                                                                                                                                                                                                                                                                                                                                                                                                                                                                                                                                                                                                                                                                                                                                                                                                                                                                                                                                                                                                                                                                                                                                          | Institut National d'Hygiène (INH)                                                                                    | Unité Mixte Internationale TransVIHMI (UMI 233 IRD - U1175 INSERM - Université de Montpellier)IRD (Institut de recherche pour le développement)    |  | Mounerou SALOU, Christelle BUTEL, Wembo A. HALATOKO,Issaka Maman, Abia A. KONOU, Amivi EHLAN, Adodo SADJI, Kokou TEGUENI,Sidonie A.M.KAGNISSODE, Akoélé SILIADIN, Alassane OURO-MEDEL, Messanh DOUFFAN,Déléma MABA,Sika DOSSIM, Améyo DORKENOO, Mireille PRINCE-DAVID,Anoumou DAGNRA,Laetitia SERRANO,Ahidjo AYOUBA,Eric DELAPORTE, Martine PEETERS                                         |
| EPI_ISL_1407115, EPI_ISL_1407116, EPI_ISL_1407253                                                                                                                                                                                                                                                                                                                                                                                                                                                                                                                                                                                                                                                                                                                                                                                                                                                                                                                                                                                                                                                                                                                                                                                                                                                                                                                                                                                                                                                                                                                                                                                                                                                                                                                                                                                                                                         | National HIV Reference Laboratory, Ministry of Health, Public Health Institute of Malawi                             | KRISP, KZN Research Innovation and Sequencing Platform                                                                                             |  | Mvula B, Chilima B, Chiwaula M, Mwangomba W, Panja L, Kasambara W, Auld A, Kim L, Kampira E, Kaba M, Wadonda N, Maida A, Giandhari J, Pillay S, Naidoo Y, Lessells R, Emmanuel SJ, Tegally H, Wilkinson E, de Oliveira T                                                                                                                                                                    |
| EPI_ISL_1415293, EPI_ISL_1415425, EPI_ISL_1415428, EPI_ISL_1416165, EPI_ISL_1416192, EPI_ISL_1416222                                                                                                                                                                                                                                                                                                                                                                                                                                                                                                                                                                                                                                                                                                                                                                                                                                                                                                                                                                                                                                                                                                                                                                                                                                                                                                                                                                                                                                                                                                                                                                                                                                                                                                                                                                                      | Institut National d'hygiène                                                                                          | "Unité Mixte Internationale TransVIHMI (UMI 233 IRD - U1175 INSERM - Université de Montpellier) IRD (Institut de recherche pour le développement)" |  | Mounerou SALOU, Christelle BUTEL, Wembo A. HALATOKO,Issaka Maman, Abia A. KONOU, Amivi EHLAN, Adodo SADJI, Kokou TEGUENI,Sidonie A.M.KAGNISSODE, Akoélé SILIADIN, Alassane OURO-MEDEL, Messanh DOUFFAN,Déléma MABA,Sika DOSSIM, Améyo DORKENOO, Mireille PRINCE-DAVID,Anoumou DAGNRA,Laetitia SERRANO,Ahidjo AYOUBA,Eric DELAPORTE, Martine PEETERS                                         |
| EPI_ISL_1433132, EPI_ISL_1434443, EPI_ISL_1435763, EPI_ISL_1436817, EPI_ISL_1437749, EPI_ISL_1438551, EPI_ISL_1439647, EPI_ISL_1440879                                                                                                                                                                                                                                                                                                                                                                                                                                                                                                                                                                                                                                                                                                                                                                                                                                                                                                                                                                                                                                                                                                                                                                                                                                                                                                                                                                                                                                                                                                                                                                                                                                                                                                                                                    | Institut National d'Hygiène                                                                                          | Unité Mixte Internationale TransVIHMI (UMI 233 IRD - U1175 INSERM - Université de Montpellier) IRD (Institut de recherche pour le développement)   |  | Mounerou SALOU, Christelle BUTEL, Wembo A. HALATOKO,Issaka Maman, Abia A. KONOU, Amivi EHLAN, Adodo SADJI, Kokou TEGUENI,Sidonie A.M.KAGNISSODE, Akoélé SILIADIN, Alassane OURO-MEDEL, Messanh DOUFFAN,Déléma MABA,Sika DOSSIM, Améyo DORKENOO, Mireille PRINCE-DAVID,Anoumou DAGNRA,Laetitia SERRANO,Ahidjo AYOUBA,Eric DELAPORTE, Martine PEETERS                                         |
| EPI_ISL_1442993, EPI_ISL_1443000, EPI_ISL_1443001, EPI_ISL_1443002, EPI_ISL_1443003                                                                                                                                                                                                                                                                                                                                                                                                                                                                                                                                                                                                                                                                                                                                                                                                                                                                                                                                                                                                                                                                                                                                                                                                                                                                                                                                                                                                                                                                                                                                                                                                                                                                                                                                                                                                       | Institut National d'hygiène                                                                                          | "Unité Mixte Internationale TransVIHMI (UMI 233 IRD - U1175 INSERM - Université de Montpellier) IRD (Institut de recherche pour le développement)" |  | Mounerou SALOU, Christelle BUTEL, Wembo A. HALATOKO,Issaka Maman, Abia A. KONOU, Amivi EHLAN, Adodo SADJI, Kokou TEGUENI,Sidonie A.M.KAGNISSODE, Akoélé SILIADIN, Alassane OURO-MEDEL, Messanh DOUFFAN,Déléma MABA,Sika DOSSIM, Améyo DORKENOO, Mireille PRINCE-DAVID,Anoumou DAGNRA,Laetitia SERRANO,Ahidjo AYOUBA,Eric DELAPORTE, Martine PEETERS                                         |
| EPI_ISL_1445275                                                                                                                                                                                                                                                                                                                                                                                                                                                                                                                                                                                                                                                                                                                                                                                                                                                                                                                                                                                                                                                                                                                                                                                                                                                                                                                                                                                                                                                                                                                                                                                                                                                                                                                                                                                                                                                                           | Institut National d'Hygiène (INH)                                                                                    | Unité Mixte Internationale TransVIHMI (UMI 233 IRD - U1175 INSERM - Université de Montpellier)IRD (Institut de recherche pour le développement)    |  | Mounerou SALOU, Christelle BUTEL, Wembo A. HALATOKO,Issaka Maman, Abia A. KONOU, Amivi EHLAN, Adodo SADJI, Kokou TEGUENI,Sidonie A.M.KAGNISSODE, Akoélé SILIADIN, Alassane OURO-MEDEL, Messanh DOUFFAN,Déléma MABA,Sika DOSSIM, Améyo DORKENOO, Mireille PRINCE-DAVID,Anoumou DAGNRA,Laetitia SERRANO,Ahidjo AYOUBA,Eric DELAPORTE, Martine PEETERS                                         |
| EPI_ISL_1469326, EPI_ISL_1469327, EPI_ISL_1469328, EPI_ISL_1469329, EPI_ISL_1469330, EPI_ISL_1469331, EPI_ISL_1469332, EPI_ISL_1469333, EPI_ISL_1469334, EPI_ISL_1469335, EPI_ISL_1469336, EPI_ISL_1469337, EPI_ISL_1469338, EPI_ISL_1469339, EPI_ISL_1469340, EPI_ISL_1469341, EPI_ISL_1469342, EPI_ISL_1469343, EPI_ISL_1469344, EPI_ISL_1469345, EPI_ISL_1469346, EPI_ISL_1469347, EPI_ISL_1469348, EPI_ISL_1469349, EPI_ISL_1469350, EPI_ISL_1469351, EPI_ISL_1469352, EPI_ISL_1469353, EPI_ISL_1469354, EPI_ISL_1469355, EPI_ISL_1469356, EPI_ISL_1469357, EPI_ISL_1469358, EPI_ISL_1469359, EPI_ISL_1469360, EPI_ISL_1469361, EPI_ISL_1469362, EPI_ISL_1469363, EPI_ISL_1469364, EPI_ISL_1469365, EPI_ISL_1469366, EPI_ISL_1469367, EPI_ISL_1469368, EPI_ISL_1469369, EPI_ISL_1469370, EPI_ISL_1469371, EPI_ISL_1469372, EPI_ISL_1469373, EPI_ISL_1469374, EPI_ISL_1469375, EPI_ISL_1469376, EPI_ISL_1469377, EPI_ISL_1469378, EPI_ISL_1469379, EPI_ISL_1469380, EPI_ISL_1469381, EPI_ISL_1469382, EPI_ISL_1469383, EPI_ISL_1469384, EPI_ISL_1469385, EPI_ISL_1469386, EPI_ISL_1469387, EPI_ISL_1469388, EPI_ISL_1469389, EPI_ISL_1469390, EPI_ISL_1469391, EPI_ISL_1469392, EPI_ISL_1469393, EPI_ISL_1469394, EPI_ISL_1469395, EPI_ISL_1469396, EPI_ISL_1469397, EPI_ISL_1469398, EPI_ISL_1469399, EPI_ISL_1469400, EPI_ISL_1469401, EPI_ISL_1469402, EPI_ISL_1469403, EPI_ISL_1469404, EPI_ISL_1469405, EPI_ISL_1469406, EPI_ISL_1469407, EPI_ISL_1469408, EPI_ISL_1469409, EPI_ISL_1469410, EPI_ISL_1469411, EPI_ISL_1469412, EPI_ISL_1469413, EPI_ISL_1469414, EPI_ISL_1469415, EPI_ISL_1469416, EPI_ISL_1469417, EPI_ISL_1469418, EPI_ISL_1469419, EPI_ISL_1469420, EPI_ISL_1469421, EPI_ISL_1469422, EPI_ISL_1469423, EPI_ISL_1469424, EPI_ISL_1469425, EPI_ISL_1469426, EPI_ISL_1469427, EPI_ISL_1469428, EPI_ISL_1469429, EPI_ISL_1469430, EPI_ISL_1469431, EPI_ISL_1469432 |                                                                                                                      |                                                                                                                                                    |  |                                                                                                                                                                                                                                                                                                                                                                                             |
| see above                                                                                                                                                                                                                                                                                                                                                                                                                                                                                                                                                                                                                                                                                                                                                                                                                                                                                                                                                                                                                                                                                                                                                                                                                                                                                                                                                                                                                                                                                                                                                                                                                                                                                                                                                                                                                                                                                 | MRC/UVRI & LSHTM Uganda Research Unit                                                                                | Where sequence data have been generated and submitted to GISAID                                                                                    |  | Matthew Cotten, Dan Lule Bugembe, My V.T. Phan, Isaac Sseewanyana, Patrick Semanda, Susan Nabadda, Pontiano Kaleebu                                                                                                                                                                                                                                                                         |
| EPI_ISL_1498125                                                                                                                                                                                                                                                                                                                                                                                                                                                                                                                                                                                                                                                                                                                                                                                                                                                                                                                                                                                                                                                                                                                                                                                                                                                                                                                                                                                                                                                                                                                                                                                                                                                                                                                                                                                                                                                                           | National Reference Laboratory                                                                                        | National Reference Laboratory                                                                                                                      |  | Enatha Mukantwari, Jeanne d'Arc Umuringa, Yvan Butera                                                                                                                                                                                                                                                                                                                                       |
| EPI_ISL_1502129, EPI_ISL_1502130, EPI_ISL_1502131, EPI_ISL_1502132, EPI_ISL_1502133, EPI_ISL_1502134, EPI_ISL_1502135, EPI_ISL_1502136, EPI_ISL_1502137, EPI_ISL_1502138, EPI_ISL_1502139, EPI_ISL_1502140, EPI_ISL_1502141, EPI_ISL_1502142, EPI_ISL_1502143, EPI_ISL_1502144, EPI_ISL_1502145                                                                                                                                                                                                                                                                                                                                                                                                                                                                                                                                                                                                                                                                                                                                                                                                                                                                                                                                                                                                                                                                                                                                                                                                                                                                                                                                                                                                                                                                                                                                                                                           |                                                                                                                      |                                                                                                                                                    |  |                                                                                                                                                                                                                                                                                                                                                                                             |
| see above                                                                                                                                                                                                                                                                                                                                                                                                                                                                                                                                                                                                                                                                                                                                                                                                                                                                                                                                                                                                                                                                                                                                                                                                                                                                                                                                                                                                                                                                                                                                                                                                                                                                                                                                                                                                                                                                                 | Division of Medical Virology, National Health Laboratory Service (NHS), Tygerberg Hospital / Stellenbosch University | Division of Medical Virology, Stellenbosch University and NHLs Tygerberg Hospital                                                                  |  | Susan Engelbrecht, Bronwyn Kleinhans, Gert van Zyl, Wolfgang Preiser                                                                                                                                                                                                                                                                                                                        |
| EPI_ISL_1508953                                                                                                                                                                                                                                                                                                                                                                                                                                                                                                                                                                                                                                                                                                                                                                                                                                                                                                                                                                                                                                                                                                                                                                                                                                                                                                                                                                                                                                                                                                                                                                                                                                                                                                                                                                                                                                                                           | Institut National d'hygiène                                                                                          | Unité Mixte Internationale TransVIHMI (UMI 233 IRD - U1175 INSERM - Université de Montpellier) IRD (Institut de recherche pour le développement)   |  | Mounerou SALOU, Christelle BUTEL, Wembo A. HALATOKO, Amivi EHLAN, Abia A. KONOU, Issaka Maman,Syntyche DEVATCHAGNI, Adodo SADJI, Kokou TEGUENI,Koku AGBODEKA, Sidonie A.M.KAGNISSODE, Akoélé SILIADIN, Alassane OURO-MEDEL, Messanh DOUFFAN,Déléma MABA,Sika DOSSIM, Améyo DORKENOO, Mireille PRINCE-DAVID,Anoumou DAGNRA, Laetitia SERRANO, Ahidjo AYOUBA, Eric DELAPORTE, Martine PEETERS |
| EPI_ISL_1508956                                                                                                                                                                                                                                                                                                                                                                                                                                                                                                                                                                                                                                                                                                                                                                                                                                                                                                                                                                                                                                                                                                                                                                                                                                                                                                                                                                                                                                                                                                                                                                                                                                                                                                                                                                                                                                                                           | Laboratoire Biolim/FSS/UL                                                                                            | Unité Mixte Internationale TransVIHMI (UMI 233 IRD - U1175 INSERM - Université de Montpellier) IRD (Institut de recherche pour le développement)   |  | Mounerou SALOU, Christelle BUTEL, Wembo A. HALATOKO, Amivi EHLAN, Abia A. KONOU, Issaka Maman, Syntyche DEVATCHAGNI, Adodo SADJI, Kokou TEGUENI,Koku AGBODEKA, Sidonie A.M.KAGNISSODE, Akoélé SILIADIN, Alassane OURO-MEDEL, Messanh DOUFFAN,Déléma MABA,Sika DOSSIM, Améyo DORKENOO, Mireille PRINCE-DAVID,Anoumou DAGNRA, Laetitia SERRANO,Ahidjo AYOUBA, Eric DELAPORTE, Martine PEETERS |
| EPI_ISL_1508958                                                                                                                                                                                                                                                                                                                                                                                                                                                                                                                                                                                                                                                                                                                                                                                                                                                                                                                                                                                                                                                                                                                                                                                                                                                                                                                                                                                                                                                                                                                                                                                                                                                                                                                                                                                                                                                                           | Institut National d'hygiène                                                                                          | Unité Mixte Internationale TransVIHMI (UMI 233 IRD - U1175 INSERM - Université de Montpellier) IRD (Institut de recherche pour le développement)   |  | Mounerou SALOU, Christelle BUTEL, Wembo A. HALATOKO, Amivi EHLAN, Abia A. KONOU, Issaka Maman,Syntyche DEVATCHAGNI, Adodo SADJI, Kokou TEGUENI,Koku AGBODEKA, Sidonie A.M.KAGNISSODE, Akoélé SILIADIN, Alassane OURO-MEDEL, Messanh DOUFFAN,Déléma MABA,Sika DOSSIM, Améyo DORKENOO, Mireille PRINCE-DAVID,Anoumou DAGNRA, Laetitia SERRANO,Ahidjo AYOUBA, Eric DELAPORTE, Martine PEETERS  |
| EPI_ISL_1508960                                                                                                                                                                                                                                                                                                                                                                                                                                                                                                                                                                                                                                                                                                                                                                                                                                                                                                                                                                                                                                                                                                                                                                                                                                                                                                                                                                                                                                                                                                                                                                                                                                                                                                                                                                                                                                                                           | Institut National d'hygiène                                                                                          | Unité Mixte Internationale TransVIHMI (UMI 233 IRD - U1175 INSERM - Université de Montpellier) IRD (Institut de recherche                          |  | Mounerou SALOU, Christelle BUTEL, Wembo A. HALATOKO, Amivi EHLAN, Abia A. KONOU, Issaka Maman, Syntyche DEVATCHAGNI, Adodo SADJI, Kokou TEGUENI,Koku AGBODEKA, Sidonie A.M.KAGNISSODE, Akoélé SILIADIN, Alassane OURO-MEDEL, Messanh DOUFFAN,Déléma MABA,Sika                                                                                                                               |



|                                                                                                                                                                                                                                                                                                                                                    |                                           |                                           |  | pour le développement)                                                                                                                                                                                                          |
|----------------------------------------------------------------------------------------------------------------------------------------------------------------------------------------------------------------------------------------------------------------------------------------------------------------------------------------------------|-------------------------------------------|-------------------------------------------|--|---------------------------------------------------------------------------------------------------------------------------------------------------------------------------------------------------------------------------------|
|                                                                                                                                                                                                                                                                                                                                                    |                                           |                                           |  | DOSSIM, Améyo DORKENOO, Mireille PRINCE-DAVID, Anoumou DAGNRA, Laetitia SERRANO, Ahidjo AYOUBA, Eric DELAPORTE, Martine PEETERS                                                                                                 |
| EPI_ISL_1516827, EPI_ISL_1516828, EPI_ISL_1516829, EPI_ISL_1516830, EPI_ISL_1516831, EPI_ISL_1516832, EPI_ISL_1516833, EPI_ISL_1516834, EPI_ISL_1516835, EPI_ISL_1516845, EPI_ISL_1516846, EPI_ISL_1516847, EPI_ISL_1516848, EPI_ISL_1516849, EPI_ISL_1516850, EPI_ISL_1516851, EPI_ISL_1516852, EPI_ISL_1516853                                   |                                           |                                           |  | EPI_ISL_1516836, EPI_ISL_1516837, EPI_ISL_1516838, EPI_ISL_1516839, EPI_ISL_1516840, EPI_ISL_1516842, EPI_ISL_1516843, EPI_ISL_1516844,                                                                                         |
| see above                                                                                                                                                                                                                                                                                                                                          | Botswana Harvard HIV Reference Laboratory | Botswana Harvard HIV Reference Laboratory |  | Sikhulile Wonderful T. Choga, Dorcas Maruapula, Thongbotho Mphoyakgosi, Boitumelo Zuze, Botshelo Radibe, Legodile Kooepile, David Lawrence, Roger Shapiro, Shahin Lockman, Mosepele Mosepele, Joseph Makhema, Simani Gaseitsiwe |
| EPI_ISL_1516855, EPI_ISL_1516856, EPI_ISL_1516857, EPI_ISL_1516858, EPI_ISL_1516863, EPI_ISL_1516864, EPI_ISL_1516865, EPI_ISL_1516866, EPI_ISL_1516867, EPI_ISL_1516868, EPI_ISL_1516869, EPI_ISL_1516870, EPI_ISL_1516871, EPI_ISL_1516873, EPI_ISL_1516874, EPI_ISL_1516876, EPI_ISL_1516877, EPI_ISL_1516879, EPI_ISL_1516880, EPI_ISL_1516881 |                                           |                                           |  | EPI_ISL_1516872, EPI_ISL_1516874, EPI_ISL_1516875, EPI_ISL_1516876, EPI_ISL_1516877,                                                                                                                                            |
| see above                                                                                                                                                                                                                                                                                                                                          | Botswana Harvard HIV Reference Laboratory | Botswana Harvard HIV Reference Laboratory |  | Sikhulile Dorcas Maruapula, Wonderful T. Choga, Thongbotho Mphoyakgosi, Boitumelo Zuze, Botshelo Radibe, Legodile Kooepile, David Lawrence, Roger Shapiro, Shahin Lockman, Mosepele Mosepele, Joseph Makhema, Simani Gaseitsiwe |
| EPI_ISL_1534313                                                                                                                                                                                                                                                                                                                                    | Groote Schuur Hospital wc GSH             | NHLS/UCT                                  |  | Arash Iranzadeh, Deelan Doolabh, Lynn Tyers, Bruna Galvao, Innocent Mudau, Marvin Hsiao, Kruger Marais, Diana Hardie, Stephen Korsman, Emmanuel SJ, Tegally H, de Oliveira T, Carolyn Williamson                                |
| EPI_ISL_1534314                                                                                                                                                                                                                                                                                                                                    | Hanover Park CHC wc HPH                   | NHLS/UCT                                  |  | Arash Iranzadeh, Deelan Doolabh, Lynn Tyers, Bruna Galvao, Innocent Mudau, Marvin Hsiao, Kruger Marais, Diana Hardie, Stephen Korsman, Emmanuel SJ, Tegally H, de Oliveira T, Carolyn Williamson                                |
| EPI_ISL_1534315, EPI_ISL_1534316, EPI_ISL_1534317, EPI_ISL_1534318, EPI_ISL_1534319, EPI_ISL_1534320                                                                                                                                                                                                                                               | Groote Schuur Hospital wc GSH             | NHLS/UCT                                  |  | Arash Iranzadeh, Deelan Doolabh, Lynn Tyers, Bruna Galvao, Innocent Mudau, Marvin Hsiao, Kruger Marais, Diana Hardie, Stephen Korsman, Emmanuel SJ, Tegally H, de Oliveira T, Carolyn Williamson                                |
| EPI_ISL_1534321                                                                                                                                                                                                                                                                                                                                    | Mitchells Plain Hospital wc MPH           | NHLS/UCT                                  |  | Arash Iranzadeh, Deelan Doolabh, Lynn Tyers, Bruna Galvao, Innocent Mudau, Marvin Hsiao, Kruger Marais, Diana Hardie, Stephen Korsman, Emmanuel SJ, Tegally H, de Oliveira T, Carolyn Williamson                                |
| EPI_ISL_1534322, EPI_ISL_1534323, EPI_ISL_1534324, EPI_ISL_1534325, EPI_ISL_1534326                                                                                                                                                                                                                                                                | Groote Schuur Hospital wc GSH             | NHLS/UCT                                  |  | Arash Iranzadeh, Deelan Doolabh, Lynn Tyers, Bruna Galvao, Innocent Mudau, Marvin Hsiao, Kruger Marais, Diana Hardie, Stephen Korsman, Emmanuel SJ, Tegally H, de Oliveira T, Carolyn Williamson                                |
| EPI_ISL_1534327, EPI_ISL_1534328, EPI_ISL_1534329, EPI_ISL_1534330                                                                                                                                                                                                                                                                                 | 2 Military Hospital wc MAA                | NHLS/UCT                                  |  | Arash Iranzadeh, Deelan Doolabh, Lynn Tyers, Bruna Galvao, Innocent Mudau, Marvin Hsiao, Kruger Marais, Diana Hardie, Stephen Korsman, Emmanuel SJ, Tegally H, de Oliveira T, Carolyn Williamson                                |
| EPI_ISL_1534331                                                                                                                                                                                                                                                                                                                                    | False Bay Hospital wc FBH                 | NHLS/UCT                                  |  | Arash Iranzadeh, Deelan Doolabh, Lynn Tyers, Bruna Galvao, Innocent Mudau, Marvin Hsiao, Kruger Marais, Diana Hardie, Stephen Korsman, Emmanuel SJ, Tegally H, de Oliveira T, Carolyn Williamson                                |
| EPI_ISL_1534332, EPI_ISL_1534333                                                                                                                                                                                                                                                                                                                   | Riversdale Clinic wc RAV                  | NHLS/UCT                                  |  | Arash Iranzadeh, Deelan Doolabh, Lynn Tyers, Bruna Galvao, Innocent Mudau, Marvin Hsiao, Kruger Marais, Diana Hardie, Stephen Korsman, Emmanuel SJ, Tegally H, de Oliveira T, Carolyn Williamson                                |
| EPI_ISL_1534334                                                                                                                                                                                                                                                                                                                                    | Conville CDC wc CVC                       | NHLS/UCT                                  |  | Arash Iranzadeh, Deelan Doolabh, Lynn Tyers, Bruna Galvao, Innocent Mudau, Marvin Hsiao, Kruger Marais, Diana Hardie, Stephen Korsman, Emmanuel SJ, Tegally H, de Oliveira T, Carolyn Williamson                                |
| EPI_ISL_1534335                                                                                                                                                                                                                                                                                                                                    | Still Bay Sat Clinic wc SFV               | NHLS/UCT                                  |  | Arash Iranzadeh, Deelan Doolabh, Lynn Tyers, Bruna Galvao, Innocent Mudau, Marvin Hsiao, Kruger Marais, Diana Hardie, Stephen Korsman, Emmanuel SJ, Tegally H, de Oliveira T, Carolyn Williamson                                |
| EPI_ISL_1534336                                                                                                                                                                                                                                                                                                                                    | Albertinia Clinic wc AAP                  | NHLS/UCT                                  |  | Arash Iranzadeh, Deelan Doolabh, Lynn Tyers, Bruna Galvao, Innocent Mudau, Marvin Hsiao, Kruger Marais, Diana Hardie, Stephen Korsman, Emmanuel SJ, Tegally H, de Oliveira T, Carolyn Williamson                                |
| EPI_ISL_1534337                                                                                                                                                                                                                                                                                                                                    | Victoria Hospital wc VHW                  | NHLS/UCT                                  |  | Arash Iranzadeh, Deelan Doolabh, Lynn Tyers, Bruna Galvao, Innocent Mudau, Marvin Hsiao, Kruger Marais, Diana Hardie, Stephen Korsman, Emmanuel SJ, Tegally H, de Oliveira T, Carolyn Williamson                                |
| EPI_ISL_1534338                                                                                                                                                                                                                                                                                                                                    | Crags Clinic wc CRG                       | NHLS/UCT                                  |  | Arash Iranzadeh, Deelan Doolabh, Lynn Tyers, Bruna Galvao, Innocent Mudau, Marvin Hsiao, Kruger Marais, Diana Hardie, Stephen Korsman, Emmanuel SJ, Tegally H, de Oliveira T, Carolyn Williamson                                |
| EPI_ISL_1534339                                                                                                                                                                                                                                                                                                                                    | Sedgefield Clinic wc SGE                  | NHLS/UCT                                  |  | Arash Iranzadeh, Deelan Doolabh, Lynn Tyers, Bruna Galvao, Innocent Mudau, Marvin Hsiao, Kruger Marais, Diana Hardie, Stephen Korsman, Emmanuel SJ, Tegally H, de Oliveira T, Carolyn Williamson                                |
| EPI_ISL_1534340                                                                                                                                                                                                                                                                                                                                    | CoVid WC Garden Route                     | NHLS/UCT                                  |  | Arash Iranzadeh, Deelan Doolabh, Lynn Tyers, Bruna Galvao, Innocent Mudau, Marvin Hsiao, Kruger Marais, Diana Hardie, Stephen Korsman, Emmanuel SJ, Tegally H, de Oliveira T, Carolyn Williamson                                |
| EPI_ISL_1534341                                                                                                                                                                                                                                                                                                                                    | George Hospital wc GRH                    | NHLS/UCT                                  |  | Arash Iranzadeh, Deelan Doolabh, Lynn Tyers, Bruna Galvao, Innocent Mudau, Marvin Hsiao, Kruger Marais, Diana Hardie, Stephen Korsman, Emmanuel SJ, Tegally H, de Oliveira T, Carolyn Williamson                                |
| EPI_ISL_1534342, EPI_ISL_1534343                                                                                                                                                                                                                                                                                                                   | Red Cross Children's Hospital wc RXH      | NHLS/UCT                                  |  | Arash Iranzadeh, Deelan Doolabh, Lynn Tyers, Bruna Galvao, Innocent Mudau, Marvin Hsiao, Kruger Marais, Diana Hardie, Stephen Korsman, Emmanuel SJ, Tegally H, de Oliveira T, Carolyn Williamson                                |
| EPI_ISL_1534344                                                                                                                                                                                                                                                                                                                                    | Oudtshoorn Hospital wc OUD                | NHLS/UCT                                  |  | Arash Iranzadeh, Deelan Doolabh, Lynn Tyers, Bruna Galvao, Innocent Mudau, Marvin Hsiao, Kruger Marais, Diana Hardie, Stephen Korsman, Emmanuel SJ, Tegally H, de Oliveira T, Carolyn Williamson                                |
| EPI_ISL_1534345, EPI_ISL_1534346, EPI_ISL_1534347, EPI_ISL_1534348, EPI_ISL_1534349, EPI_ISL_1534350, EPI_ISL_1534351, EPI_ISL_1534352                                                                                                                                                                                                             | Groote Schuur Hospital wc GSH             | NHLS/UCT                                  |  | Arash Iranzadeh, Deelan Doolabh, Lynn Tyers, Bruna Galvao, Innocent Mudau, Marvin Hsiao, Kruger Marais, Diana Hardie, Stephen Korsman, Emmanuel SJ, Tegally H, de Oliveira T, Carolyn Williamson                                |
| EPI_ISL_1534353                                                                                                                                                                                                                                                                                                                                    | Victoria Hospital wc VHW                  | NHLS/UCT                                  |  | Arash Iranzadeh, Deelan Doolabh, Lynn Tyers, Bruna Galvao, Innocent Mudau, Marvin Hsiao, Kruger Marais, Diana Hardie, Stephen Korsman, Emmanuel SJ, Tegally H, de Oliveira T, Carolyn Williamson                                |
| EPI_ISL_1534354                                                                                                                                                                                                                                                                                                                                    | Vanguard CHC wc VGC                       | NHLS/UCT                                  |  | Arash Iranzadeh, Deelan Doolabh, Lynn Tyers, Bruna Galvao, Innocent Mudau, Marvin Hsiao, Kruger Marais, Diana Hardie, Stephen Korsman, Emmanuel SJ, Tegally H, de Oliveira T, Carolyn Williamson                                |
| EPI_ISL_1534355                                                                                                                                                                                                                                                                                                                                    | CoVid WC Garden Route                     | NHLS/UCT                                  |  | Arash Iranzadeh, Deelan Doolabh, Lynn Tyers, Bruna Galvao, Innocent Mudau, Marvin Hsiao, Kruger Marais, Diana Hardie, Stephen Korsman, Emmanuel SJ, Tegally H, de Oliveira T, Carolyn Williamson                                |
| EPI_ISL_1534356                                                                                                                                                                                                                                                                                                                                    | Sedgefield Clinic wc SGE                  | NHLS/UCT                                  |  | Arash Iranzadeh, Deelan Doolabh, Lynn Tyers, Bruna Galvao, Innocent Mudau, Marvin Hsiao, Kruger Marais, Diana Hardie, Stephen Korsman, Emmanuel SJ, Tegally H, de Oliveira T, Carolyn Williamson                                |
| EPI_ISL_1534357                                                                                                                                                                                                                                                                                                                                    | Heidelberg Clinic wc HBC                  | NHLS/UCT                                  |  | Arash Iranzadeh, Deelan Doolabh, Lynn Tyers, Bruna Galvao, Innocent Mudau, Marvin Hsiao, Kruger Marais, Diana Hardie, Stephen Korsman, Emmanuel SJ, Tegally H, de Oliveira T, Carolyn Williamson                                |
| EPI_ISL_1534358                                                                                                                                                                                                                                                                                                                                    | Hillside Clinic wc BFW                    | NHLS/UCT                                  |  | Arash Iranzadeh, Deelan Doolabh, Lynn Tyers, Bruna Galvao, Innocent Mudau, Marvin Hsiao, Kruger Marais, Diana Hardie, Stephen Korsman, Emmanuel SJ, Tegally H, de Oliveira T, Carolyn Williamson                                |
| EPI_ISL_1534359                                                                                                                                                                                                                                                                                                                                    | Heideveld Emergency Centre                | NHLS/UCT                                  |  | Arash Iranzadeh, Deelan Doolabh, Lynn Tyers, Bruna Galvao, Innocent Mudau, Marvin Hsiao, Kruger Marais, Diana Hardie, Stephen Korsman, Emmanuel SJ, Tegally H, de Oliveira T, Carolyn Williamson                                |
| EPI_ISL_1534360                                                                                                                                                                                                                                                                                                                                    | Knysna CDC wc WLC                         | NHLS/UCT                                  |  | Arash Iranzadeh, Deelan Doolabh, Lynn Tyers, Bruna Galvao, Innocent Mudau, Marvin Hsiao, Kruger Marais, Diana Hardie, Stephen Korsman, Emmanuel SJ, Tegally H, de Oliveira T, Carolyn Williamson                                |
| EPI_ISL_1534361                                                                                                                                                                                                                                                                                                                                    | Van Wyksdorp Sat Clinic wc VWS            | NHLS/UCT                                  |  | Arash Iranzadeh, Deelan Doolabh, Lynn Tyers, Bruna Galvao, Innocent Mudau, Marvin Hsiao, Kruger Marais, Diana Hardie, Stephen Korsman, Emmanuel SJ, Tegally H, de Oliveira T, Carolyn Williamson                                |
| EPI_ISL_1534363                                                                                                                                                                                                                                                                                                                                    | Bredasdorp Clinic wc BDC                  | NHLS/UCT                                  |  | Arash Iranzadeh, Deelan Doolabh, Lynn Tyers, Bruna Galvao, Innocent Mudau, Marvin Hsiao, Kruger Marais, Diana Hardie, Stephen Korsman, Emmanuel SJ, Tegally H, de Oliveira T, Carolyn Williamson                                |

|                                                                                                                                                                                                                                                                                                                                                                                                                                                                                                                                               |                                                                                                                       |                                                                                                                                                  |                                                                                                                                                                                                                                                                                                                                                                                                                                        |
|-----------------------------------------------------------------------------------------------------------------------------------------------------------------------------------------------------------------------------------------------------------------------------------------------------------------------------------------------------------------------------------------------------------------------------------------------------------------------------------------------------------------------------------------------|-----------------------------------------------------------------------------------------------------------------------|--------------------------------------------------------------------------------------------------------------------------------------------------|----------------------------------------------------------------------------------------------------------------------------------------------------------------------------------------------------------------------------------------------------------------------------------------------------------------------------------------------------------------------------------------------------------------------------------------|
| EPI_ISL_1545291, EPI_ISL_1545321, EPI_ISL_1545323                                                                                                                                                                                                                                                                                                                                                                                                                                                                                             | Instituto Nacional de Investigação em Saúde                                                                           | KRISP, KZN Research Innovation and Sequencing Platform                                                                                           | Morais J, Neto Z, Afonso P, Miranda J, David K, Inglês L, Pereira A, Paulo A Carralero RR Paixão JP, Freitas RH, Mufinda M, Lutucuta S, Giandhari J, Pillay S, Naidoo Y, Emmanuel SJ, Tegally H, Wilkinson E, de Oliveira T                                                                                                                                                                                                            |
| EPI_ISL_1575297, EPI_ISL_1575298, EPI_ISL_1575299, EPI_ISL_1575310, EPI_ISL_1575436, EPI_ISL_1575441, EPI_ISL_1575442, EPI_ISL_1587449                                                                                                                                                                                                                                                                                                                                                                                                        | Laboratoire Biolim/FSS/UL                                                                                             | Unité Mixte Internationale TransVIHMI (UMI 233 IRD - U1175 INSERM - Université de Montpellier) IRD (Institut de recherche pour le développement) | Mounerou SALOU, Christelle BUTEL, Wembo A. HALATOKO, Amivi EHLAN, Abia A. KONOU, Issaka Maman, Syntyche DEVATCHAGNI, Adodo SADJI, Kokou TEGUENI, Kokou AGBODEKA, Sidonie A.M.KAGNISSODE, Akoélé SILIADIN, Alassane OURO-MEDEL, Messanh DOUFFAN, Déliéma MABA, Sika DOSSIM, Améyo DORKENOO, Mireille PRINCE-DAVID, Anoumou DAGNRA, Laetitia SERRANO, Ahidjo AYOUBA, Eric DELAPORTE, Martine PEETERS                                     |
| EPI_ISL_1591352, EPI_ISL_1591353, EPI_ISL_1591354, EPI_ISL_1591355, EPI_ISL_1591356, EPI_ISL_1591357, EPI_ISL_1591358, EPI_ISL_1591360, EPI_ISL_1591361, EPI_ISL_1591362, EPI_ISL_1591363, EPI_ISL_1591364, EPI_ISL_1591365, EPI_ISL_1591366, EPI_ISL_1591367, EPI_ISL_1591368, EPI_ISL_1591369, EPI_ISL_1591370, EPI_ISL_1591371, EPI_ISL_1591372, EPI_ISL_1591373, EPI_ISL_1591374, EPI_ISL_1591375, EPI_ISL_1591376, EPI_ISL_1591383, EPI_ISL_1591384, EPI_ISL_1591385, EPI_ISL_1591386, EPI_ISL_1591449, EPI_ISL_1608100, EPI_ISL_1608101 | Division of Medical Virology, National Health Laboratory Service (NHLS), Tygerberg Hospital / Stellenbosch University | Division of Medical Virology, Stellenbosch University and NHLS Tygerberg Hospital                                                                | Susan Engelbrecht, Bronwyn Kleinhans, Gert van Zyl, Wolfgang Preiser                                                                                                                                                                                                                                                                                                                                                                   |
| see above                                                                                                                                                                                                                                                                                                                                                                                                                                                                                                                                     |                                                                                                                       |                                                                                                                                                  |                                                                                                                                                                                                                                                                                                                                                                                                                                        |
| EPI_ISL_1620193                                                                                                                                                                                                                                                                                                                                                                                                                                                                                                                               | MRCG at LSHTM Genomics lab                                                                                            | MRCG at LSHTM Genomics lab                                                                                                                       | Abdul Karim sesay, Abdoulie Kante, Jarra Manneh, Mariama Kujabi, Bakary Sanyang                                                                                                                                                                                                                                                                                                                                                        |
| EPI_ISL_1630255, EPI_ISL_1630261, EPI_ISL_1630266, EPI_ISL_1630267, EPI_ISL_1630268, EPI_ISL_1630269, EPI_ISL_1630270, EPI_ISL_1630271                                                                                                                                                                                                                                                                                                                                                                                                        | IRSESSEF                                                                                                              | Abbott                                                                                                                                           | Souleymane Mboup, Ambroise Ahouidi, Abdou Padane, Nafissatou Leye, Moustapha Mbou, Aminata Mboup, Papa Alassane Diaw, Cyrille Diedhiou, Aminata Dia, Anna julienne selbe Ndiaye, Ndeye Diabou Diagne, Ana Olivo, Todd Meyer, Barbara Harris, Mary Rodgers, Gavin Cloherty                                                                                                                                                              |
| EPI_ISL_1633465, EPI_ISL_1633466, EPI_ISL_1633467                                                                                                                                                                                                                                                                                                                                                                                                                                                                                             | Institute for Health Research, Epidemiological Surveillance and Training (IRESSEF)                                    | Abbott                                                                                                                                           | Souleymane Mboup, Ambroise Ahouidi, Abdou Padane, Nafissatou Leye, Moustapha Mbou, Aminata Mboup, Papa Alassane Diaw, Cyrille Diedhiou, Aminata Dia, Anna julienne selbe Ndiaye, Ndeye Diabou Diagne, Ana Olivo, Todd Meyer, Barbara Harris, Mary Rodgers, Gavin Cloherty                                                                                                                                                              |
| EPI_ISL_1652049, EPI_ISL_1652050, EPI_ISL_1652051, EPI_ISL_1652052, EPI_ISL_1652053, EPI_ISL_1652054, EPI_ISL_1652061, EPI_ISL_1652062, EPI_ISL_1652063, EPI_ISL_1652064, EPI_ISL_1652065, EPI_ISL_1652066                                                                                                                                                                                                                                                                                                                                    | Integrated Biorepository of H3Africa Uganda - IBRH3AU                                                                 | Molecular Biology Laboratory                                                                                                                     | Savannah Mwesigwa, Eric Katagrya, Gerald Mboowa, David Patrick Kateete, Misaki Wayengera, Emmanuel Nasinghe, Ashaba Fred Katabazi, Edgar Kigozi, Samuel Kirimunda, Rogers Kamulegeya, Moses Luutu, Lwanga Newton, Nsubuga Gideon, Bernard Ssentalo Bagaya, Sarah Stanley, Moses Joloba                                                                                                                                                 |
| see above                                                                                                                                                                                                                                                                                                                                                                                                                                                                                                                                     |                                                                                                                       |                                                                                                                                                  |                                                                                                                                                                                                                                                                                                                                                                                                                                        |
| EPI_ISL_1654210                                                                                                                                                                                                                                                                                                                                                                                                                                                                                                                               | Laboratoire Biolim/FSS/UL                                                                                             | Unité Mixte Internationale TransVIHMI (UMI 233 IRD - U1175 INSERM - Université de Montpellier) IRD (Institut de recherche pour le développement) | Mounerou SALOU, Christelle BUTEL, Wembo A. HALATOKO, Amivi EHLAN, Abia A. KONOU, Issaka Maman, Syntyche DEVATCHAGNI, Adodo SADJI, Kokou TEGUENI, Kokou AGBODEKA, Sidonie A.M.KAGNISSODE, Akoélé SILIADIN, Alassane OURO-MEDEL, Messanh DOUFFAN, Déliéma MABA, Sika DOSSIM, Améyo DORKENOO, Mireille PRINCE-DAVID, Anoumou DAGNRA, Laetitia SERRANO, Ahidjo AYOUBA, Eric DELAPORTE, Martine PEETERS                                     |
| EPI_ISL_1655961                                                                                                                                                                                                                                                                                                                                                                                                                                                                                                                               | Integrated Biorepository of H3Africa Uganda - IBRH3AU                                                                 | Molecular Biology Laboratory                                                                                                                     | Savannah Mwesigwa, Eric Katagrya, Gerald Mboowa, David Patrick Kateete, Misaki Wayengera, Emmanuel Nasinghe, Ashaba Fred Katabazi, Edgar Kigozi, Samuel Kirimunda, Rogers Kamulegeya, Moses Luutu, Lwanga Newton, Nsubuga Gideon, Bernard Ssentalo Bagaya, Sarah Stanley, Moses Joloba                                                                                                                                                 |
| EPI_ISL_1660225, EPI_ISL_1660226, EPI_ISL_1660227, EPI_ISL_1660228, EPI_ISL_1660229, EPI_ISL_1660230, EPI_ISL_1660231, EPI_ISL_1660232, EPI_ISL_1660233, EPI_ISL_1660234, EPI_ISL_1660291, EPI_ISL_1660292                                                                                                                                                                                                                                                                                                                                    | Virology Unit, Institut Pasteur de Madagascar                                                                         | Virology Unit, Institut Pasteur de Madagascar                                                                                                    | Christian Ranaivoson, Cara E. Brook, Vida Ahyong, Soa Fy Andriamandimby, Vololoniaina Raharinosy, Tsiry Randriambolanantsoa, Helisoa Razafimanjato, Norosoa Razanajatovo, Michelle Tan, Cristina M. Tato, Joseph L. DeRisi, Jean-Michel Heraud, Philippe Dussart                                                                                                                                                                       |
| see above                                                                                                                                                                                                                                                                                                                                                                                                                                                                                                                                     |                                                                                                                       |                                                                                                                                                  |                                                                                                                                                                                                                                                                                                                                                                                                                                        |
| EPI_ISL_1660296, EPI_ISL_1660310, EPI_ISL_1660311, EPI_ISL_1660312, EPI_ISL_1660313, EPI_ISL_1660314, EPI_ISL_1660315, EPI_ISL_1660316, EPI_ISL_1660317, EPI_ISL_1660318, EPI_ISL_1660319, EPI_ISL_1660320, EPI_ISL_1660321, EPI_ISL_1660322, EPI_ISL_1660323, EPI_ISL_1660324, EPI_ISL_1660325                                                                                                                                                                                                                                               | Virology Unit, Institut Pasteur de Madagascar                                                                         | Virology Unit, Institut Pasteur de Madagascar                                                                                                    | Marion Barbet, Sylvie Behillil, Frédéric Lemoine, Corinne Maufrais, Christophe Malabat, Emmanuelle Permal, Méline Bizard, Angela Brisebarre, Camille Capel, Louise Lefrançois, Etienne Simon-Lorière, Vincent Enouf, Maud Vanpeene, Christian Ranaivoson, Cara E. Brook, Soa Fy Andriamandimby, Vololoniaina Raharinosy, Tsiry Randriambolanantsoa, Helisoa Razafimanjato, Norosoa Razanajatovo, Sylvie van der Werf, Philippe Dussart |
| see above                                                                                                                                                                                                                                                                                                                                                                                                                                                                                                                                     |                                                                                                                       |                                                                                                                                                  |                                                                                                                                                                                                                                                                                                                                                                                                                                        |
| EPI_ISL_1662578, EPI_ISL_1662579, EPI_ISL_1662580, EPI_ISL_1662581, EPI_ISL_1662582, EPI_ISL_1662583, EPI_ISL_1662584, EPI_ISL_1662585, EPI_ISL_1662586, EPI_ISL_1662587, EPI_ISL_1662588, EPI_ISL_1662589, EPI_ISL_1662590, EPI_ISL_1662591, EPI_ISL_1662592                                                                                                                                                                                                                                                                                 | Molecular diagnostic unit for viral haemorrhagic fevers and emerging viruses, Bouaké CHU Laboratory                   | Project group Epidemiology of Highly Pathogenic Microorganisms, Robert Koch-Institute                                                            | Chantal Akoua-Koffi, Diané Bamourou, Etilé A Noah, Grit Schubert, Essia Belarbi, Safiatou Karidioula, Adjaratou Traoré, Soundélé Maïté, Monemo Pacome, Coulibaly Mbegnan, Bamba Fatoumata Touré, Kra Oufoué, Fabian Leendertz                                                                                                                                                                                                          |
| EPI_ISL_1663657, EPI_ISL_1663658, EPI_ISL_1663660, EPI_ISL_1663661, EPI_ISL_1663662, EPI_ISL_1663664, EPI_ISL_1663665, EPI_ISL_1663669, EPI_ISL_1663670, EPI_ISL_1663673                                                                                                                                                                                                                                                                                                                                                                      | Molecular diagnostic unit for viral haemorrhagic fevers and emerging viruses, Bouaké CHU Laboratory                   | Molecular diagnostic unit for viral haemorrhagic fevers and emerging viruses, Bouaké CHU Laboratory                                              | Chantal Akoua-Koffi, Diané Bamourou, Etilé A Noah, Oby Wayoro, Safiatou Karidioula, Adjaratou Traoré, Soundélé Maïté, Monemo Pacome, Coulibaly Mbegnan, Bamba Fatoumata Touré, Kra Oufoué, Grit Schubert, Essia Belarbi, Fabian Leendertz                                                                                                                                                                                              |
| EPI_ISL_1672387                                                                                                                                                                                                                                                                                                                                                                                                                                                                                                                               | Virology Unit, Institut Pasteur de Madagascar                                                                         | Virology Unit, Institut Pasteur de Madagascar                                                                                                    | Christian Ranaivoson, Cara E. Brook, Vida Ahyong, Soa Fy Andriamandimby, Vololoniaina Raharinosy, Tsiry Randriambolanantsoa, Helisoa Razafimanjato, Norosoa Razanajatovo, Michelle Tan, Cristina M. Tato, Joseph L. DeRisi, Jean-Michel Heraud, Philippe Dussart                                                                                                                                                                       |
| EPI_ISL_1672551, EPI_ISL_1672552, EPI_ISL_1672553, EPI_ISL_1672554, EPI_ISL_1672555, EPI_ISL_1672556, EPI_ISL_1672557                                                                                                                                                                                                                                                                                                                                                                                                                         | Laboratorio de Investigaciones de Baney                                                                               | Swiss Tropical and Public Health Institute                                                                                                       | Carlos Cortes, Claudia Daubenberger, Guillermo Garcia, Salome Hosch, Bonifacio Manguire Nlavo, Maximilian Mpina, Elizabeth Nyakarungu, Diosdado Ojama Nseng Ada, Mitoha Ondo O Ayekaba, Tobias Schindler, Philipp Wagner, Philip Wonder Phiri                                                                                                                                                                                          |
| EPI_ISL_1673311, EPI_ISL_1673312, EPI_ISL_1673313                                                                                                                                                                                                                                                                                                                                                                                                                                                                                             | Laboratorio de Investigaciones de Baney                                                                               | Swiss Tropical and Public Health Institute                                                                                                       | Salome Hosch, Carlos Cortes, Claudia Daubenberger, Guillermo Garcia, Bonifacio Manguire Nlavo, Maximilian Mpina, Elizabeth Nyakarungu, Diosdado Ojama Nseng Ada, Mitoha Ondo O Ayekaba, Tobias Schindler, Philipp Wagner, Philip Wonder Phiri                                                                                                                                                                                          |
| EPI_ISL_1677700, EPI_ISL_1677702, EPI_ISL_1677704, EPI_ISL_1677705, EPI_ISL_1677707, EPI_ISL_1677714, EPI_ISL_1677715, EPI_ISL_1677719, EPI_ISL_1677720                                                                                                                                                                                                                                                                                                                                                                                       | National Health Laboratory                                                                                            | Botswana Institute for Technology Research and Innovation                                                                                        | Kefentse Arnold Tumedí, Madisa Mine, Dineo Emang Tshiamo. Tefelo Thela, Gape Nyepetsi, Thongbotho Mphoyakgosi, Malebogo Kebabonye, Maitswarello Ignatius Matsheka                                                                                                                                                                                                                                                                      |
| EPI_ISL_1697387, EPI_ISL_1697388, EPI_ISL_1697390, EPI_ISL_1697392, EPI_ISL_1697393, EPI_ISL_1697394, EPI_ISL_1697395, EPI_ISL_1697396                                                                                                                                                                                                                                                                                                                                                                                                        | Iresséf / LBV                                                                                                         | Iresséf Genomics lab                                                                                                                             | Souleymane MBOUP, Abdou PADANE, Khadim GUEYE, Assane DIENG, Papa Alassane DIAW, Anna Julienne Selbe NDIAYE, Birahim Piere NDIAYE, Adjiratu Aissatou BA, Barada Cisse, Mengue FALLY, Aminata MBOUP, Pauline SENE, Moustapha MBOW, Serigne Mbaye Lo NDIAYE, Ndeye Coumba Toure KANE, Alioune TINE, Nafissatou LEYE, Gora LO, SADA DIALLO, Ambroise AHOUIDI, OUMY DIOP, Astou Gaye GAYE, Aminata DIA, Yacine DIA, Makhtar Camara          |
| EPI_ISL_1700674                                                                                                                                                                                                                                                                                                                                                                                                                                                                                                                               | Laboratorio de Investigaciones de Baney                                                                               | Swiss Tropical and Public Health Institute                                                                                                       | Salome Hosch, Carlos Cortes, Claudia Daubenberger, Guillermo Garcia, Bonifacio Manguire Nlavo, Maximilian Mpina, Elizabeth Nyakarungu, Diosdado Ojama Nseng Ada, Mitoha Ondo O Ayekaba, Tobias Schindler, Philipp Wagner, Philip Wonder Phiri                                                                                                                                                                                          |
| EPI_ISL_1706553, EPI_ISL_1706554, EPI_ISL_1706555, EPI_ISL_1706556, EPI_ISL_1706557, EPI_ISL_1706558, EPI_ISL_1706559, EPI_ISL_1706560, EPI_ISL_1706561                                                                                                                                                                                                                                                                                                                                                                                       | Groote Schuur Hospital wc GSH                                                                                         | NHLS/UCT                                                                                                                                         | Arash Irazzadeh, Deelan Doolabh, Lynn Tyers, Bruna Galvao, Innocent Mudau, Marvin Hsiao, Phillip Marais, Diana Hardie, Stephen Korsman, Emmanuel SJ, Tegally H, de Oliveira T, Carolyn Williamson                                                                                                                                                                                                                                      |
| EPI_ISL_1715414                                                                                                                                                                                                                                                                                                                                                                                                                                                                                                                               | Nigerian Centre for Disease Control (NCDC)                                                                            | African Centre of Excellence for Genomics of Infectious Diseases, Redeemer's University                                                          | Olawoye, I.B. et al                                                                                                                                                                                                                                                                                                                                                                                                                    |
| EPI_ISL_1731545, EPI_ISL_1731548, EPI_ISL_1731551, EPI_ISL_1731554, EPI_ISL_1731560                                                                                                                                                                                                                                                                                                                                                                                                                                                           | MRCG at LSHTM Genomics lab                                                                                            | MRCG at LSHTM Genomics lab                                                                                                                       | Abdul Karim sesay, Abdoulie Kante, Jarra Manneh, Mariama Kujabi, Bakary Sanyang                                                                                                                                                                                                                                                                                                                                                        |
| EPI_ISL_1753020, EPI_ISL_1753021, EPI_ISL_1753022                                                                                                                                                                                                                                                                                                                                                                                                                                                                                             | Laboratorio de Investigaciones de Baney                                                                               | Swiss Tropical and Public Health Institute                                                                                                       | Salome Hosch, Carlos Cortes, Claudia Daubenberger, Guillermo Garcia, Bonifacio Manguire Nlavo, Maximilian Mpina, Elizabeth Nyakarungu, Diosdado Ojama Nseng Ada, Mitoha Ondo O Ayekaba, Tobias Schindler, Philipp Wagner, Philip Wonder Phiri                                                                                                                                                                                          |

|                                                                                                                                                                                                                                                                                                                                                                                                                                                                                                                                                                                                                                                                                                                                                                                                                                                                                                                                                                                                                                                            |                                                                                                         |                                                                                          |                                                                                                                                                                                                                                                                                                           |                                                                                                                                                                                                                                                                            |
|------------------------------------------------------------------------------------------------------------------------------------------------------------------------------------------------------------------------------------------------------------------------------------------------------------------------------------------------------------------------------------------------------------------------------------------------------------------------------------------------------------------------------------------------------------------------------------------------------------------------------------------------------------------------------------------------------------------------------------------------------------------------------------------------------------------------------------------------------------------------------------------------------------------------------------------------------------------------------------------------------------------------------------------------------------|---------------------------------------------------------------------------------------------------------|------------------------------------------------------------------------------------------|-----------------------------------------------------------------------------------------------------------------------------------------------------------------------------------------------------------------------------------------------------------------------------------------------------------|----------------------------------------------------------------------------------------------------------------------------------------------------------------------------------------------------------------------------------------------------------------------------|
| EPI_ISL_1760554                                                                                                                                                                                                                                                                                                                                                                                                                                                                                                                                                                                                                                                                                                                                                                                                                                                                                                                                                                                                                                            | Laboratoire Professeur Daniel GAHOUMA (LPDG)                                                            | Centre de recherches médicales de Lambaréné (CERMEL)                                     | Haruka Abe, Yuri Ushijima, Rodrigue Bikangui, Samira Zoa-Assoumou, Georgelin Nguema Ondo, Gédéon P. Manouana, Ayong Moure, Emilio Skarwan, Bénédicte Ndeboko, Rotimi Myrabelle Avome Houeuchenou, Joel Fleury Djoba Siawaya, Bertrand Lell, Ayola A. Adegnikia, Jiro Yasuda                               |                                                                                                                                                                                                                                                                            |
| EPI_ISL_1790077, EPI_ISL_1790078, EPI_ISL_1790079, EPI_ISL_1790080, EPI_ISL_1790081, EPI_ISL_1790082, EPI_ISL_1790083, EPI_ISL_1790084, EPI_ISL_1790085, EPI_ISL_1790086, EPI_ISL_1790087, EPI_ISL_1790088, EPI_ISL_1790089                                                                                                                                                                                                                                                                                                                                                                                                                                                                                                                                                                                                                                                                                                                                                                                                                                | see above                                                                                               | Centre Pasteur Annexe de Garoua                                                          | Institut Pasteur de Dakar                                                                                                                                                                                                                                                                                 |                                                                                                                                                                                                                                                                            |
| EPI_ISL_1817557, EPI_ISL_1817668, EPI_ISL_1817683, EPI_ISL_1817686                                                                                                                                                                                                                                                                                                                                                                                                                                                                                                                                                                                                                                                                                                                                                                                                                                                                                                                                                                                         | see above                                                                                               | Groote Schuur Hospital wc GSH                                                            | NHLS/UCT                                                                                                                                                                                                                                                                                                  |                                                                                                                                                                                                                                                                            |
| EPI_ISL_1817714                                                                                                                                                                                                                                                                                                                                                                                                                                                                                                                                                                                                                                                                                                                                                                                                                                                                                                                                                                                                                                            | see above                                                                                               | False Bay Hospital wc FBH                                                                | NHLS/UCT                                                                                                                                                                                                                                                                                                  |                                                                                                                                                                                                                                                                            |
| EPI_ISL_1817750, EPI_ISL_1817751, EPI_ISL_1817753, EPI_ISL_1817754                                                                                                                                                                                                                                                                                                                                                                                                                                                                                                                                                                                                                                                                                                                                                                                                                                                                                                                                                                                         | see above                                                                                               | Groote Schuur Hospital wc GSH                                                            | NHLS/UCT                                                                                                                                                                                                                                                                                                  |                                                                                                                                                                                                                                                                            |
| EPI_ISL_1817856, EPI_ISL_1817864                                                                                                                                                                                                                                                                                                                                                                                                                                                                                                                                                                                                                                                                                                                                                                                                                                                                                                                                                                                                                           | National Health Laboratory Service, South Africa                                                        | KRISP, KZN Research Innovation and Sequencing Platform                                   | Giandhari J, Pillay S, Naidoo Y, Ramphal U, Lessells R, Mdlalose K, York D, Khan S, Emmanuel SJ, Tegally H, Wilkinson E, de Oliveira T                                                                                                                                                                    |                                                                                                                                                                                                                                                                            |
| EPI_ISL_1818894, EPI_ISL_1818895                                                                                                                                                                                                                                                                                                                                                                                                                                                                                                                                                                                                                                                                                                                                                                                                                                                                                                                                                                                                                           | NHLS Universitas Academic                                                                               | UFS Virology                                                                             | PA Bester, MM Nyaga, P Nthiga, MT Mogotsi, Emmanuel Ogunbayo, D Goedhals, T de Oliveira                                                                                                                                                                                                                   |                                                                                                                                                                                                                                                                            |
| EPI_ISL_1822608, EPI_ISL_1822609                                                                                                                                                                                                                                                                                                                                                                                                                                                                                                                                                                                                                                                                                                                                                                                                                                                                                                                                                                                                                           | IRSESSEF                                                                                                | Abbott                                                                                   | Souleymane Mboup, Ambroise Ahouidi, Abdou Padane, Nafissatou Leye, Moustapha Mbou, Aminata Mboup, Papa Alassane Diaw, Cyrille Diedhiou, Aminata Dia , Anna julienne selbe Ndiaye, Ndeye Diabou Diagne, Ana Olivo, Todd Meyer, Barbara Harris, Mary Rodgers, Gavin Cloherty                                |                                                                                                                                                                                                                                                                            |
| EPI_ISL_1827632                                                                                                                                                                                                                                                                                                                                                                                                                                                                                                                                                                                                                                                                                                                                                                                                                                                                                                                                                                                                                                            | National Institute for Communicable Diseases National Health Laboratory Services, Gauteng, South Africa | National Institute for Communicable Diseases of the National Health Laboratory Service   | Amoako DG, Scheepers C, Mohale T, Ntuli N, Mahlangu B, Ismail A, Bhiman JN                                                                                                                                                                                                                                |                                                                                                                                                                                                                                                                            |
| EPI_ISL_1827855, EPI_ISL_1827856, EPI_ISL_1827857, EPI_ISL_1827861, EPI_ISL_1827862, EPI_ISL_1827864, EPI_ISL_1827865, EPI_ISL_1827866, EPI_ISL_1827867, EPI_ISL_1827868, EPI_ISL_1827869, EPI_ISL_1827870, EPI_ISL_1827871, EPI_ISL_1827872, EPI_ISL_1827874, EPI_ISL_1827875, EPI_ISL_1827876, EPI_ISL_1827877, EPI_ISL_1827878, EPI_ISL_1827879, EPI_ISL_1827881, EPI_ISL_1827882, EPI_ISL_1827883, EPI_ISL_1827884, EPI_ISL_1827885, EPI_ISL_1827886, EPI_ISL_1827889, EPI_ISL_1827890, EPI_ISL_1827902, EPI_ISL_1827903, EPI_ISL_1827906, EPI_ISL_1827907, EPI_ISL_1827908, EPI_ISL_1827910, EPI_ISL_1827911, EPI_ISL_1827912, EPI_ISL_1827913, EPI_ISL_1827914, EPI_ISL_1827915, EPI_ISL_1827916, EPI_ISL_1827918, EPI_ISL_1827919, EPI_ISL_1827920, EPI_ISL_1827922, EPI_ISL_1827923, EPI_ISL_1827924, EPI_ISL_1827925, EPI_ISL_1827926, EPI_ISL_1827928, EPI_ISL_1827929, EPI_ISL_1827930, EPI_ISL_1827931, EPI_ISL_1827932, EPI_ISL_1827933, EPI_ISL_1827934, EPI_ISL_1827935, EPI_ISL_1827936, EPI_ISL_1827937, EPI_ISL_1827938, EPI_ISL_1827939 | see above                                                                                               | Institute for Health Research, Epidemiological Surveillance and Training (IRESSEF)       | Abbott Laboratories                                                                                                                                                                                                                                                                                       | Souleymane Mboup, Ambroise Ahouidi, Abdou Padane, Nafissatou Leye, Moustapha Mbou, Aminata Mboup, Papa Alassane Diaw, Cyrille Diedhiou, Aminata Dia , Anna julienne selbe Ndiaye, Ndeye Diabou Diagne, Ana Olivo, Todd Meyer, Barbara Harris, Mary Rodgers, Gavin Cloherty |
| EPI_ISL_1910385                                                                                                                                                                                                                                                                                                                                                                                                                                                                                                                                                                                                                                                                                                                                                                                                                                                                                                                                                                                                                                            | see above                                                                                               | Iressef Genomics lab                                                                     | IRSESSEF                                                                                                                                                                                                                                                                                                  | Souleymane MBOUP, Abdou PADANE, Khadim GUEYE, Papa Alassane DIAW, Birahim Piere NDIAYE, Barada CISSE, Aminata MBOUP, Moustapha MBOW, Ndeye Coumba Toure KANE, Nafissatou LEYE, Gora LO, Ambroise AHOUIDI , Astou Gaye GAYE, Aminata DIA, Yacine DIA                        |
| EPI_ISL_1914786, EPI_ISL_1914804, EPI_ISL_1914806, EPI_ISL_1914807                                                                                                                                                                                                                                                                                                                                                                                                                                                                                                                                                                                                                                                                                                                                                                                                                                                                                                                                                                                         | National Institute for Communicable Diseases National Health Laboratory Services, Gauteng, South Africa | National Institute for Communicable Diseases of the National Health Laboratory Service   | Amoako DG, Scheepers C, Mohale T, Ntuli N, Mahlangu B, Ismail A, Bhiman JN                                                                                                                                                                                                                                |                                                                                                                                                                                                                                                                            |
| EPI_ISL_1936464                                                                                                                                                                                                                                                                                                                                                                                                                                                                                                                                                                                                                                                                                                                                                                                                                                                                                                                                                                                                                                            | Laboratoire Professeur Daniel GAHOUMA (LPDG)                                                            | Centre de recherches médicales de Lambaréné (CERMEL)                                     | Haruka Abe, Yuri Ushijima, Rodrigue Bikangui, Samira Zoa-Assoumou, Georgelin Nguema Ondo, Gédéon P. Manouana, Ayong Moure, Emilio Skarwan, Bénédicte Ndeboko, Rotimi Myrabelle Avome Houeuchenou, Joel Fleury Djoba Siawaya, Bertrand Lell, Ayola A. Adegnikia, Jiro Yasuda                               |                                                                                                                                                                                                                                                                            |
| EPI_ISL_2001061                                                                                                                                                                                                                                                                                                                                                                                                                                                                                                                                                                                                                                                                                                                                                                                                                                                                                                                                                                                                                                            | Immunology, Noguchi Memorial Institute for Medical Research                                             | Immunology, Noguchi Memorial Institute for Medical Research                              | Halatoko A.W., Maman,I., Sadij,Y.A., Mohktar,Q., Asare,K.M., Kossi,K., Salah,D., Layibo,Y., Kumordjie,S., Agbodji,B., Appiah-Kubi,J., Lamboni,L., Assane,H., Issa,Z., Awunyo,S., Dorkenoo,A., Bonney,J.K., Saiou,M., Dagnran,A., Adu.B.                                                                   |                                                                                                                                                                                                                                                                            |
| EPI_ISL_2002669, EPI_ISL_2002670, EPI_ISL_2002671, EPI_ISL_2002672, EPI_ISL_2002673, EPI_ISL_2002674                                                                                                                                                                                                                                                                                                                                                                                                                                                                                                                                                                                                                                                                                                                                                                                                                                                                                                                                                       | Laboratorio de Investigaciones de Baney                                                                 | Swiss Tropical and Public Health Institute                                               | Salome Hosch, Carlos Cortes, Claudia Daubenberger, Guillermo Garcia, Yahya Maidane, Bonifacio Manguire Nlavo, Maximilian Mpina, Elizabeth Nyakarungu, Diosdado Odjama Nseng Ada, Mitoha Ondo O Ayekaba, Tobias Schindler, Philipp Wagner, Philip Wonder Phiri                                             |                                                                                                                                                                                                                                                                            |
| EPI_ISL_2649891, EPI_ISL_2649892, EPI_ISL_2649893, EPI_ISL_2649894, EPI_ISL_2649895, EPI_ISL_2649896, EPI_ISL_2649897, EPI_ISL_2649898, EPI_ISL_2649899, EPI_ISL_2649900                                                                                                                                                                                                                                                                                                                                                                                                                                                                                                                                                                                                                                                                                                                                                                                                                                                                                   | Scientific Department, Division of Molecular Biology                                                    | Scientific Department, Division of Molecular Biology                                     | Fillo,S., Giordani,F., Monte,A., Faggioni,G., De Santis,R., D'Amore,N., Palomba,S., Hamdani,T., Taloa,K., Jumaa,A.B., Bitrou,S., Alarusi,A., Mad,W., Zorgani,A., Elahmer,O., Annajr,B., Bashein,A., Lista,F., De Sanctis,R., Hamdani,T.N., Taloa,K.A., Belkhir,A.B., Bitrou,S.M., Alarusi,A.M., Madi,W.Y. |                                                                                                                                                                                                                                                                            |
| EPI_ISL_414647                                                                                                                                                                                                                                                                                                                                                                                                                                                                                                                                                                                                                                                                                                                                                                                                                                                                                                                                                                                                                                             | Viral Respiratory Lab, National Institute for Biomedical Research (INRB)                                | Pathogen Sequencing Lab, National Institute for Biomedical Research (INRB)               | Placide Mbala-Kingebeni, Edith Nkwembe, Eddy Kinganda-Lusamaki, Amuri Aziza, Catherine Pratt, Matthias Pauthner, Josh Quick, Allison Black, James Hadfield, Trevor Bedford, Ian Goodfellow, Nick Loman, Kristian Andersen, Michael Wiley, Steve Ahuka-Mundeke, Jean-Jacques Muyembe Tamfum                |                                                                                                                                                                                                                                                                            |
| EPI_ISL_417186                                                                                                                                                                                                                                                                                                                                                                                                                                                                                                                                                                                                                                                                                                                                                                                                                                                                                                                                                                                                                                             | National Institute for Communicable Diseases of the National Health Laboratory Service                  | National Institute for Communicable Diseases of the National Health Laboratory Service   | Allam M, Kwenda S, van Heusden P, Khumalo Z, Mohale T, Subramoney K, von Gottberg, A, Ismail A, Bhiman JN                                                                                                                                                                                                 |                                                                                                                                                                                                                                                                            |
| EPI_ISL_417433, EPI_ISL_417434, EPI_ISL_417435, EPI_ISL_417436, EPI_ISL_417437, EPI_ISL_417438, EPI_ISL_417439, EPI_ISL_417440, EPI_ISL_417441, EPI_ISL_417442, EPI_ISL_417941, EPI_ISL_417942, EPI_ISL_417944, EPI_ISL_417946, EPI_ISL_417947, EPI_ISL_417948, EPI_ISL_417950, EPI_ISL_417955                                                                                                                                                                                                                                                                                                                                                                                                                                                                                                                                                                                                                                                                                                                                                             | see above                                                                                               | Viral Respiratory Lab, National Institute for Biomedical Research (INRB)                 | Pathogen Sequencing Lab, National Institute for Biomedical Research (INRB)                                                                                                                                                                                                                                |                                                                                                                                                                                                                                                                            |
| EPI_ISL_418206, EPI_ISL_418207, EPI_ISL_418208, EPI_ISL_418209, EPI_ISL_418210, EPI_ISL_418211                                                                                                                                                                                                                                                                                                                                                                                                                                                                                                                                                                                                                                                                                                                                                                                                                                                                                                                                                             | Institut Pasteur Dakar                                                                                  | Institut Pasteur de Dakar                                                                | Ndongo Dia, Ousmane Faye, Amadou Alpha Sall                                                                                                                                                                                                                                                               |                                                                                                                                                                                                                                                                            |
| EPI_ISL_418212                                                                                                                                                                                                                                                                                                                                                                                                                                                                                                                                                                                                                                                                                                                                                                                                                                                                                                                                                                                                                                             | Institut Pasteur Dakar                                                                                  | Institut Pasteur de Dakar                                                                | Ndongo Dia, Ousmane Faye, Amadou Alpha Sall                                                                                                                                                                                                                                                               |                                                                                                                                                                                                                                                                            |
| EPI_ISL_418213, EPI_ISL_418214                                                                                                                                                                                                                                                                                                                                                                                                                                                                                                                                                                                                                                                                                                                                                                                                                                                                                                                                                                                                                             | Institut Pasteur Dakar                                                                                  | Institut Pasteur de Dakar                                                                | Ndongo Dia, Ousmane Faye, Amadou Alpha Sall                                                                                                                                                                                                                                                               |                                                                                                                                                                                                                                                                            |
| EPI_ISL_418215                                                                                                                                                                                                                                                                                                                                                                                                                                                                                                                                                                                                                                                                                                                                                                                                                                                                                                                                                                                                                                             | Institut Pasteur Dakar                                                                                  | Institut Pasteur de Dakar                                                                | Ndongo Dia, Ousmane Faye, Amadou Alpha Sall                                                                                                                                                                                                                                                               |                                                                                                                                                                                                                                                                            |
| EPI_ISL_418216, EPI_ISL_418217                                                                                                                                                                                                                                                                                                                                                                                                                                                                                                                                                                                                                                                                                                                                                                                                                                                                                                                                                                                                                             | Institut Pasteur Dakar                                                                                  | Institut Pasteur de Dakar                                                                | Ndongo Dia, Ousmane Faye, Amadou Alpha Sall                                                                                                                                                                                                                                                               |                                                                                                                                                                                                                                                                            |
| EPI_ISL_418241, EPI_ISL_418242                                                                                                                                                                                                                                                                                                                                                                                                                                                                                                                                                                                                                                                                                                                                                                                                                                                                                                                                                                                                                             | NIC Viral Respiratory Unit - Institut Pasteur of Algeria                                                | National Reference Center for Viruses of Respiratory Infections, Institut Pasteur, Paris | Mélanie Albert, Marion Barbet, Sylvie Behillili, Méline Bizard, Angela Brisebarre, Flora Donati, Etienne Simon-Lorière, Vincent Enouf, Maud Vanpeene, Sylvie van der Werf, Fawzi Derrar                                                                                                                   |                                                                                                                                                                                                                                                                            |
| EPI_ISL_420030, EPI_ISL_420031, EPI_ISL_420032, EPI_ISL_420033, EPI_ISL_420034, EPI_ISL_420035                                                                                                                                                                                                                                                                                                                                                                                                                                                                                                                                                                                                                                                                                                                                                                                                                                                                                                                                                             | Viral Respiratory Lab, National Institute for Biomedical Research (INRB)                                | Pathogen Sequencing Lab, National Institute for Biomedical Research (INRB)               | Placide Mbala-Kingebeni, Edith Nkwembe, Eddy Kinganda-Lusamaki, Amuri Aziza, Catherine Pratt, Matthias Pauthner, Josh Quick, Allison Black, James Hadfield, Trevor Bedford, Ian Goodfellow, Nick Loman, Kristian Andersen, Michael Wiley, Steve Ahuka-Mundeke, Jean-Jacques Muyembe Tamfum                |                                                                                                                                                                                                                                                                            |
| EPI_ISL_420037                                                                                                                                                                                                                                                                                                                                                                                                                                                                                                                                                                                                                                                                                                                                                                                                                                                                                                                                                                                                                                             | NIC Viral Respiratory Unit - Institut Pasteur of Algeria                                                | National Reference Center for Viruses of Respiratory Infections, Institut Pasteur, Paris | Mélanie Albert, Marion Barbet, Sylvie Behillili, Méline Bizard, Angela Brisebarre, Flora Donati, Etienne Simon-Lorière, Vincent Enouf, Maud Vanpeene, Sylvie van der Werf, Fawzi Derrar                                                                                                                   |                                                                                                                                                                                                                                                                            |
| EPI_ISL_420069, EPI_ISL_420070, EPI_ISL_420071                                                                                                                                                                                                                                                                                                                                                                                                                                                                                                                                                                                                                                                                                                                                                                                                                                                                                                                                                                                                             | Institut Pasteur Dakar                                                                                  | Institut Pasteur de Dakar                                                                | Ndongo Dia, Moussa Moise Diagne, Mamadou Diop, Ousmane Faye, Amadou Alpha Sall                                                                                                                                                                                                                            |                                                                                                                                                                                                                                                                            |
| EPI_ISL_420072, EPI_ISL_420073, EPI_ISL_420074                                                                                                                                                                                                                                                                                                                                                                                                                                                                                                                                                                                                                                                                                                                                                                                                                                                                                                                                                                                                             | Institut Pasteur Dakar                                                                                  | Institut Pasteur de Dakar                                                                | Ndongo Dia, Moussa Moise Diagne, Mamadou Diop, Ousmane Faye , Amadou Alpha Sall                                                                                                                                                                                                                           |                                                                                                                                                                                                                                                                            |
| EPI_ISL_420075                                                                                                                                                                                                                                                                                                                                                                                                                                                                                                                                                                                                                                                                                                                                                                                                                                                                                                                                                                                                                                             | Institut Pasteur Dakar                                                                                  | Institut Pasteur de Dakar                                                                | Ndongo Dia, Moussa Moise Diagne, Mamadou Diop, Ousmane Faye , Amadou Alpha Sall                                                                                                                                                                                                                           |                                                                                                                                                                                                                                                                            |
| EPI_ISL_420076                                                                                                                                                                                                                                                                                                                                                                                                                                                                                                                                                                                                                                                                                                                                                                                                                                                                                                                                                                                                                                             | Institut Pasteur Dakar                                                                                  | Institut Pasteur de Dakar                                                                | Ndongo Dia, Moussa Moise Diagne, Mamadou Diop, Ousmane Faye , Ndongo Dia                                                                                                                                                                                                                                  |                                                                                                                                                                                                                                                                            |
| EPI_ISL_420077, EPI_ISL_420078, EPI_ISL_420079                                                                                                                                                                                                                                                                                                                                                                                                                                                                                                                                                                                                                                                                                                                                                                                                                                                                                                                                                                                                             | Institut Pasteur Dakar                                                                                  | Institut Pasteur de Dakar                                                                | Ndongo Dia, Moussa Moise Diagne, Mamadou Diop, Ousmane Faye , Amadou Alpha Sall                                                                                                                                                                                                                           |                                                                                                                                                                                                                                                                            |
| EPI_ISL_420838, EPI_ISL_420839, EPI_ISL_420840, EPI_ISL_420841, EPI_ISL_420842, EPI_ISL_420843, EPI_ISL_420844, EPI_ISL_420845, EPI_ISL_420846, EPI_ISL_420847, EPI_ISL_420848, EPI_ISL_420849, EPI_ISL_420850, EPI_ISL_420851, EPI_ISL_420852, EPI_ISL_420853, EPI_ISL_420854                                                                                                                                                                                                                                                                                                                                                                                                                                                                                                                                                                                                                                                                                                                                                                             |                                                                                                         |                                                                                          |                                                                                                                                                                                                                                                                                                           |                                                                                                                                                                                                                                                                            |

|                                                                                                                                                                                                                                                                                                                                                                                                                                                                                                                                                                                                                                                                                                                                                                                                                                                                                                                                                |                                                                                                                                   |                                                                                                                                   |                                                                                                                                                                                                                                                                                                                                               |
|------------------------------------------------------------------------------------------------------------------------------------------------------------------------------------------------------------------------------------------------------------------------------------------------------------------------------------------------------------------------------------------------------------------------------------------------------------------------------------------------------------------------------------------------------------------------------------------------------------------------------------------------------------------------------------------------------------------------------------------------------------------------------------------------------------------------------------------------------------------------------------------------------------------------------------------------|-----------------------------------------------------------------------------------------------------------------------------------|-----------------------------------------------------------------------------------------------------------------------------------|-----------------------------------------------------------------------------------------------------------------------------------------------------------------------------------------------------------------------------------------------------------------------------------------------------------------------------------------------|
| see above                                                                                                                                                                                                                                                                                                                                                                                                                                                                                                                                                                                                                                                                                                                                                                                                                                                                                                                                      | Viral Respiratory Lab, National Institute for Biomedical Research (INRB)                                                          | Pathogen Sequencing Lab, National Institute for Biomedical Research (INRB)                                                        | Placide Mbala-Kingebeni, Edith Nkwembe, Eddy Kinganda-Lusamaki, Amuri Aziza, Catherine Pratt, Matthias Pauthner, Josh Quick, Allison Black, James Hadfield, Trevor Bedford, Ian Goodfellow, Nick Loman, Kristian Andersen, Michael Wiley, Steve Ahuka-Mundeke, Jean-Jacques Muyembe Tamfum                                                    |
| EPI_ISL_421572                                                                                                                                                                                                                                                                                                                                                                                                                                                                                                                                                                                                                                                                                                                                                                                                                                                                                                                                 | Molecular Diagnostic Services and FLOWpath                                                                                        | KRISP, KZN Research Innovation and Sequencing Platform                                                                            | Giandhari J, Pillay S, Ngcapu S, Samsunder N, Lessells R, Chimukangara B, Deforche K, Tegally H, Wilkinson E, de Oliveira T                                                                                                                                                                                                                   |
| EPI_ISL_421573, EPI_ISL_421574, EPI_ISL_421575, EPI_ISL_421576                                                                                                                                                                                                                                                                                                                                                                                                                                                                                                                                                                                                                                                                                                                                                                                                                                                                                 | Molecular Diagnostic Services                                                                                                     | KRISP, KZN Research Innovation and Sequencing Platform                                                                            | Giandhari J, Pillay S, Ngcapu S, Samsunder N, Lessells R, Chimukangara B, Deforche K, Tegally H, Wilkinson E, de Oliveira T                                                                                                                                                                                                                   |
| EPI_ISL_422382                                                                                                                                                                                                                                                                                                                                                                                                                                                                                                                                                                                                                                                                                                                                                                                                                                                                                                                                 | NMIMR, Department of Virology                                                                                                     | WACCBIP, University of Ghana                                                                                                      | Joyce M. Ngoi, Bright Adu, Collins M. Misita, Selassie Kumordjie, Miriam Eshun, Linda Boatemaa, Vanessa Magnussen, Erasmus Kotey, Fred Tei-Maya, Dominic S. Y. Amuzu, Peter Quashie, Augustina Arjaquah, Ivy Asante, Evelyn Bonney, George B. Kyei, Kofi Bonney, Gordon A. Awandare, William Ampofo                                           |
| EPI_ISL_422384, EPI_ISL_422387, EPI_ISL_422390, EPI_ISL_422394, EPI_ISL_422397, EPI_ISL_422398, EPI_ISL_422399, EPI_ISL_422400, EPI_ISL_422401, EPI_ISL_422402, EPI_ISL_422403, EPI_ISL_422404, EPI_ISL_422405, EPI_ISL_422406                                                                                                                                                                                                                                                                                                                                                                                                                                                                                                                                                                                                                                                                                                                 | see above                                                                                                                         | NMIMR, Department of Virology                                                                                                     | WACCBIP, University of Ghana                                                                                                                                                                                                                                                                                                                  |
| EPI_ISL_428855                                                                                                                                                                                                                                                                                                                                                                                                                                                                                                                                                                                                                                                                                                                                                                                                                                                                                                                                 | MRCG at LSHTM Geomics lab                                                                                                         | MRCG at LSHTM Geomics lab                                                                                                         | Sesay et al                                                                                                                                                                                                                                                                                                                                   |
| EPI_ISL_428856                                                                                                                                                                                                                                                                                                                                                                                                                                                                                                                                                                                                                                                                                                                                                                                                                                                                                                                                 | MRCG at LSHTM Geomics Lab                                                                                                         | MRCG at LSHTM Geomics lab                                                                                                         | Sesay et al                                                                                                                                                                                                                                                                                                                                   |
| EPI_ISL_428857                                                                                                                                                                                                                                                                                                                                                                                                                                                                                                                                                                                                                                                                                                                                                                                                                                                                                                                                 | MRCG at LSHTM Geomics lab                                                                                                         | MRCG at LSHTM Geomics lab                                                                                                         | Sesay et al                                                                                                                                                                                                                                                                                                                                   |
| EPI_ISL_429254, EPI_ISL_429255, EPI_ISL_429258, EPI_ISL_429259                                                                                                                                                                                                                                                                                                                                                                                                                                                                                                                                                                                                                                                                                                                                                                                                                                                                                 | Viral Respiratory Lab, National Institute for Biomedical Research (INRB)                                                          | Pathogen Sequencing Lab, National Institute for Biomedical Research (INRB)                                                        | Placide Mbala-Kingebeni, Edith Nkwembe, Eddy Kinganda-Lusamaki, Amuri Aziza, Catherine Pratt, Matthias Pauthner, Josh Quick, Allison Black, James Hadfield, Trevor Bedford, Ian Goodfellow, Nick Loman, Kristian Andersen, Michael Wiley, Steve Ahuka-Mundeke, Jean-Jacques Muyembe Tamfum                                                    |
| EPI_ISL_430297                                                                                                                                                                                                                                                                                                                                                                                                                                                                                                                                                                                                                                                                                                                                                                                                                                                                                                                                 | National Institute for Communicable Diseases of the National Health Laboratory Service                                            | National Institute for Communicable Diseases of the National Health Laboratory Service                                            | Allam M, Kwenda S, van Heusden P, Khumalo Z, Mohale T, Subramoney K, von Gottberg, A, Ismail A, Bhiman JN                                                                                                                                                                                                                                     |
| EPI_ISL_430819                                                                                                                                                                                                                                                                                                                                                                                                                                                                                                                                                                                                                                                                                                                                                                                                                                                                                                                                 | Center of Scientific Excellence for Influenza Viruses, National Research Centre (NRC), Egypt.                                     | Center of Scientific Excellence for Influenza Viruses, National Research Centre (NRC), Egypt.                                     | Mohamed Ahmed Ali, Ahmed Kandeil, Ahmed Mostafa, Rabeh El-Shesheny, Mahmoud Shehata, Wael Roshdy, Shymaa Showky Ahmed, Amal Naguib, Nancy M. El Guindy, Mokhtar Gomaa, Ahmed El-Taweel, Ahmed E Kayed, Yassmin Moatasim, Omnia Kutkat, Sara Mahmoud, Mina Kamel, Abo Shama, M Noura, Mohamed El Sayes                                         |
| EPI_ISL_430820                                                                                                                                                                                                                                                                                                                                                                                                                                                                                                                                                                                                                                                                                                                                                                                                                                                                                                                                 | Center of Scientific Excellence for Influenza Viruses, National Research Centre (NRC), Egypt.                                     | Center of Scientific Excellence for Influenza Viruses, National Research Centre (NRC), Egypt.                                     | Mohamed Ahmed Ali, Ahmed Kandeil, Ahmed Mostafa, Rabeh El-Shesheny, Mahmoud Shehata, Wael Roshdy, Shymaa Showky Ahmed, Amal Naguib, Mokhtar Gomaa, Ahmed El-Taweel, Ahmed E Kayed, Yassmin Moatasim, Omnia Kutkat, Sara Mahmoud, Mina Kamel, Abo Shama, M Noura, Mohamed El Sayes, Nancy M. El Guindy                                         |
| EPI_ISL_431011, EPI_ISL_431012                                                                                                                                                                                                                                                                                                                                                                                                                                                                                                                                                                                                                                                                                                                                                                                                                                                                                                                 | Viral Respiratory Lab, National Institute for Biomedical Research (INRB)                                                          | Pathogen Sequencing Lab, National Institute for Biomedical Research (INRB)                                                        | Placide Mbala-Kingebeni, Edith Nkwembe, Eddy Kinganda-Lusamaki, Amuri Aziza, Francisca Muyembe Mawete, Catherine Pratt, Matthias Pauthner, Josh Quick, Allison Black, James Hadfield, Trevor Bedford, Ian Goodfellow, Andrew Rambaut, Nick Loman, Kristian Andersen, Michael Wiley, Steve Ahuka-Mundeke, Jean-Jacques Muyembe Tamfum          |
| EPI_ISL_434678, EPI_ISL_434679, EPI_ISL_434680, EPI_ISL_434681                                                                                                                                                                                                                                                                                                                                                                                                                                                                                                                                                                                                                                                                                                                                                                                                                                                                                 | Viral Respiratory Lab, National Institute for Biomedical Research (INRB)                                                          | Pathogen Sequencing Lab, National Institute for Biomedical Research (INRB)                                                        | Placide Mbala-Kingebeni; Edith Nkwembe; Eddy Kinganda-Lusamaki; Amuri Aziza; Francisca Muyembe Mawete; Catherine Pratt; Matthias Pauthner; Josh Quick; Allison Black; James Hadfield; Trevor Bedford; Ian Goodfellow; Andrew Rambaut; Nick Loman; Kristian Andersen; Michael Wiley; Steve Ahuka-Mundeke; Jean-Jacques Muyembe Tamfum          |
| EPI_ISL_434710, EPI_ISL_434711, EPI_ISL_435032, EPI_ISL_435033                                                                                                                                                                                                                                                                                                                                                                                                                                                                                                                                                                                                                                                                                                                                                                                                                                                                                 | Viral Respiratory Lab, National Institute for Biomedical Research (INRB)                                                          | Pathogen Sequencing Lab, National Institute for Biomedical Research (INRB)                                                        | Placide Mbala-Kingebeni, Edith Nkwembe, Eddy Kinganda-Lusamaki, Adrienne Amuri Aziza, Francisca Muyembe Mawete, Catherine Pratt, Matthias Pauthner, Josh Quick, Allison Black, James Hadfield, Trevor Bedford, Ian Goodfellow, Andrew Rambaut, Nick Loman, Kristian Andersen, Michael Wiley, Steve Ahuka-Mundeke, Jean-Jacques Muyembe Tamfum |
| EPI_ISL_435058, EPI_ISL_435059                                                                                                                                                                                                                                                                                                                                                                                                                                                                                                                                                                                                                                                                                                                                                                                                                                                                                                                 | National Institute for Communicable Diseases of the National Health Laboratory Service                                            | National Institute for Communicable Diseases of the National Health Laboratory Service                                            | Allam M, Kwenda S, van Heusden P, Khumalo Z, Mohale T, Subramoney K, von Gottberg, A, Ismail A, Bhiman JN                                                                                                                                                                                                                                     |
| EPI_ISL_435113, EPI_ISL_435114, EPI_ISL_435116, EPI_ISL_435117, EPI_ISL_435118                                                                                                                                                                                                                                                                                                                                                                                                                                                                                                                                                                                                                                                                                                                                                                                                                                                                 | Viral Respiratory Lab, National Institute for Biomedical Research (INRB)                                                          | Pathogen Sequencing Lab, National Institute for Biomedical Research (INRB)                                                        | Placide Mbala-Kingebeni, Edith Nkwembe, Eddy Kinganda-Lusamaki, Adrienne Amuri Aziza, Francisca Muyembe Mawete, Catherine Pratt, Matthias Pauthner, Josh Quick, Allison Black, James Hadfield, Trevor Bedford, Ian Goodfellow, Andrew Rambaut, Nick Loman, Kristian Andersen, Michael Wiley, Steve Ahuka-Mundeke, Jean-Jacques Muyembe Tamfum |
| EPI_ISL_435156, EPI_ISL_435157, EPI_ISL_435158, EPI_ISL_435159, EPI_ISL_435160, EPI_ISL_435161, EPI_ISL_435162, EPI_ISL_435163, EPI_ISL_435164, EPI_ISL_435165, EPI_ISL_435166, EPI_ISL_435167, EPI_ISL_435168, EPI_ISL_436194, EPI_ISL_436412                                                                                                                                                                                                                                                                                                                                                                                                                                                                                                                                                                                                                                                                                                 | see above                                                                                                                         | Viral Respiratory Lab, National Institute for Biomedical Research (INRB)                                                          | Pathogen Sequencing Lab, National Institute for Biomedical Research (INRB)                                                                                                                                                                                                                                                                    |
| EPI_ISL_436684, EPI_ISL_436685, EPI_ISL_436686, EPI_ISL_436687                                                                                                                                                                                                                                                                                                                                                                                                                                                                                                                                                                                                                                                                                                                                                                                                                                                                                 | KRISP, KZN Research Innovation and Sequencing Platform                                                                            | KRISP, KZN Research Innovation and Sequencing Platform                                                                            | Giandhari J, Pillay S, Lessells R, Chimukangara B, Deforche K, Tegally H, Wilkinson E, de Oliveira T                                                                                                                                                                                                                                          |
| EPI_ISL_437193, EPI_ISL_437194, EPI_ISL_437195, EPI_ISL_437196, EPI_ISL_437337, EPI_ISL_437338, EPI_ISL_437339, EPI_ISL_437340, EPI_ISL_437341, EPI_ISL_437342, EPI_ISL_437343, EPI_ISL_437344, EPI_ISL_437345, EPI_ISL_437346, EPI_ISL_437347, EPI_ISL_437348, EPI_ISL_437350, EPI_ISL_437351, EPI_ISL_437352, EPI_ISL_437353, EPI_ISL_437354, EPI_ISL_437355, EPI_ISL_437356, EPI_ISL_437357, EPI_ISL_437358, EPI_ISL_447230, EPI_ISL_447231, EPI_ISL_447232, EPI_ISL_447233, EPI_ISL_447234, EPI_ISL_447235, EPI_ISL_447236, EPI_ISL_447237, EPI_ISL_447238, EPI_ISL_447239, EPI_ISL_447240, EPI_ISL_447241, EPI_ISL_447242, EPI_ISL_447243, EPI_ISL_447244, EPI_ISL_447245, EPI_ISL_447246, EPI_ISL_447247, EPI_ISL_447248, EPI_ISL_447249, EPI_ISL_447596, EPI_ISL_447597, EPI_ISL_447598, EPI_ISL_447599, EPI_ISL_447600, EPI_ISL_447601, EPI_ISL_447602, EPI_ISL_447603, EPI_ISL_447604, EPI_ISL_447605, EPI_ISL_447606, EPI_ISL_447607 | see above                                                                                                                         | Viral Respiratory Lab, National Institute for Biomedical Research (INRB)                                                          | Pathogen Sequencing Lab, National Institute for Biomedical Research (INRB)                                                                                                                                                                                                                                                                    |
| EPI_ISL_450296, EPI_ISL_450297, EPI_ISL_450298, EPI_ISL_450299, EPI_ISL_450300, EPI_ISL_450301                                                                                                                                                                                                                                                                                                                                                                                                                                                                                                                                                                                                                                                                                                                                                                                                                                                 | National Institute for Communicable Diseases of the National Health Laboratory Service                                            | National Institute for Communicable Diseases of the National Health Laboratory Service                                            | Allam M, Ismail A, Khumalo Z, Kwenda S, van Heusden P, Mtshali P, Mnyameni F, Mohale T, Subramoney K, Bhiman JN                                                                                                                                                                                                                               |
| EPI_ISL_450482                                                                                                                                                                                                                                                                                                                                                                                                                                                                                                                                                                                                                                                                                                                                                                                                                                                                                                                                 | National Influenza and other Respiratory Viruses Centre-Tunisia, Virology Unit, Microbiology Laboratory, Charles Nicolle Hospital | National Influenza and other Respiratory Viruses Centre-Tunisia, Virology Unit, Microbiology Laboratory, Charles Nicolle Hospital | El Moussi,A., Abid,S., Ben Nasr,M., Landolsi,I., Charaa,L., Enigrou,D. and Boutiba,I.                                                                                                                                                                                                                                                         |
| EPI_ISL_450490, EPI_ISL_450491, EPI_ISL_450492, EPI_ISL_450493, EPI_ISL_450494                                                                                                                                                                                                                                                                                                                                                                                                                                                                                                                                                                                                                                                                                                                                                                                                                                                                 | unknown                                                                                                                           | National Influenza and other Respiratory Viruses Centre-Tunisia                                                                   | El Moussi,A., Abid,S., Ben Nasr,M., Landolsi,I., Charaa,L., Ferjeni,A., Arab Ennigrou,D., Boutiba,I.                                                                                                                                                                                                                                          |
| EPI_ISL_450495                                                                                                                                                                                                                                                                                                                                                                                                                                                                                                                                                                                                                                                                                                                                                                                                                                                                                                                                 | National Institute for Communicable Diseases of the National Health Laboratory Service                                            | National Institute for Communicable Diseases of the National Health Laboratory Service                                            | Allam M, Ismail A, Khumalo Z, Kwenda S, van Heusden P, Mtshali P, Mnyameni F, Mohale T, Subramoney K, Bhiman JN                                                                                                                                                                                                                               |
| EPI_ISL_450507                                                                                                                                                                                                                                                                                                                                                                                                                                                                                                                                                                                                                                                                                                                                                                                                                                                                                                                                 | Nigerian Institute of Medical Research                                                                                            | Nigerian Institute of Medical Research                                                                                            | Shaibu,J.O., Onwuamah,C.K., James,A.B., Okwuraiwe,A.P., Amoo,O.S., Salu,O.B., Ige,F.A., Okoli,L.C., Ahmed,R.A., Sokei,J., Oyefolu,A.O., Omilabu,S.A., Salako,B.L. and Audu,R.A.                                                                                                                                                               |
| EPI_ISL_451183, EPI_ISL_451184, EPI_ISL_451185, EPI_ISL_451186, EPI_ISL_451187, EPI_ISL_451188, EPI_ISL_451189, EPI_ISL_451190, EPI_ISL_451191, EPI_ISL_451192, EPI_ISL_451193, EPI_ISL_451194, EPI_ISL_451195, EPI_ISL_451196, EPI_ISL_451197, EPI_ISL_451198, EPI_ISL_451199, EPI_ISL_451200, EPI_ISL_451201, EPI_ISL_451202                                                                                                                                                                                                                                                                                                                                                                                                                                                                                                                                                                                                                 | see above                                                                                                                         | Uganda Virus Research Institute                                                                                                   | MRC/UVRI & LSHTM Uganda Research Unit                                                                                                                                                                                                                                                                                                         |
| EPI_ISL_451400                                                                                                                                                                                                                                                                                                                                                                                                                                                                                                                                                                                                                                                                                                                                                                                                                                                                                                                                 | Laboratoire de Recherche et d'Analyse Médicale de la Gendarmerie Royale                                                           | Laboratoire de Recherche et d'Analyse Médicale de la Gendarmerie Royale                                                           | Dan Lule Bugembe, John Kiyiwa, My V.T Phan, Phionah Tushabe, Stephen Balinandi, Beatrice Dhaala, Deogratius Ssemwanga, Jonas Lexow, Henry Mwebesa, Jane Aceng, Henry Kyobe, Julius Lutwama, Pontiano Kaleebu, Matthew Cotten                                                                                                                  |
| EPI_ISL_455362                                                                                                                                                                                                                                                                                                                                                                                                                                                                                                                                                                                                                                                                                                                                                                                                                                                                                                                                 | Nigeria Centre for Disease Control (NCDC)                                                                                         | African Centre of Excellence for Genomics of Infectious                                                                           | Sanaâ LEMRISS, Amal SOUIRI, Saâd EL KABBAJ                                                                                                                                                                                                                                                                                                    |
|                                                                                                                                                                                                                                                                                                                                                                                                                                                                                                                                                                                                                                                                                                                                                                                                                                                                                                                                                |                                                                                                                                   |                                                                                                                                   | Oluniyi P.E., Ajogbasile F.V., Kayode A., Olawoye I., Uwanibe J., Oguzie J., Olumade T., Folarin O.A., Ihekweazu C., Happi C.T.                                                                                                                                                                                                               |

|                                                                                                                                                                                                                                                                                                                                                                                                                                                                                                                                                                                                                                                                                                                                                                                                                                                                                                                                                                                                                                                                                                                                                                                                                                                                                                                                                                                                                                                |                                                                |                                                                                                                            |                                                                                                                                                                                                           |                                                                                                                                                                                                                                                          |
|------------------------------------------------------------------------------------------------------------------------------------------------------------------------------------------------------------------------------------------------------------------------------------------------------------------------------------------------------------------------------------------------------------------------------------------------------------------------------------------------------------------------------------------------------------------------------------------------------------------------------------------------------------------------------------------------------------------------------------------------------------------------------------------------------------------------------------------------------------------------------------------------------------------------------------------------------------------------------------------------------------------------------------------------------------------------------------------------------------------------------------------------------------------------------------------------------------------------------------------------------------------------------------------------------------------------------------------------------------------------------------------------------------------------------------------------|----------------------------------------------------------------|----------------------------------------------------------------------------------------------------------------------------|-----------------------------------------------------------------------------------------------------------------------------------------------------------------------------------------------------------|----------------------------------------------------------------------------------------------------------------------------------------------------------------------------------------------------------------------------------------------------------|
|                                                                                                                                                                                                                                                                                                                                                                                                                                                                                                                                                                                                                                                                                                                                                                                                                                                                                                                                                                                                                                                                                                                                                                                                                                                                                                                                                                                                                                                |                                                                | Diseases (ACEGID), Redeemer's University, Ede, Osun State, Nigeria                                                         |                                                                                                                                                                                                           |                                                                                                                                                                                                                                                          |
| EPI_ISL_455412, EPI_ISL_455413, EPI_ISL_455414                                                                                                                                                                                                                                                                                                                                                                                                                                                                                                                                                                                                                                                                                                                                                                                                                                                                                                                                                                                                                                                                                                                                                                                                                                                                                                                                                                                                 | Nigeria Centre for Disease Control (NCDC)                      | African Centre of Excellence for Genomics of Infectious Diseases (ACEGID), Redeemer's University, Ede, Osun State, Nigeria | Oluniyi P.E., Ajogbasile F.V., Kayode A., Oguzie J., Olawoye I., Uwanibe J., Olumade T., Folarin O.A., Ihekweazu C., Happi C.T.                                                                           |                                                                                                                                                                                                                                                          |
| EPI_ISL_455415                                                                                                                                                                                                                                                                                                                                                                                                                                                                                                                                                                                                                                                                                                                                                                                                                                                                                                                                                                                                                                                                                                                                                                                                                                                                                                                                                                                                                                 | Nigeria Centre for Disease Control (NCDC)                      | African Centre of Excellence for Genomics of Infectious Diseases (ACEGID), Redeemer's University, Ede, Osun State, Nigeria | Oluniyi P.E., Ajogbasile F.V., Kayode A., Oguzie J., Olawoye I., Uwanibe J., Olumade T., Folarin O.A., Ihekweazu C., Happi C.T.                                                                           |                                                                                                                                                                                                                                                          |
| EPI_ISL_455418, EPI_ISL_455419                                                                                                                                                                                                                                                                                                                                                                                                                                                                                                                                                                                                                                                                                                                                                                                                                                                                                                                                                                                                                                                                                                                                                                                                                                                                                                                                                                                                                 | Nigeria Centre for Disease Control (NCDC)                      | African Centre of Excellence for Genomics of Infectious Diseases (ACEGID), Redeemer's University, Ede, Osun State, Nigeria | Oluniyi P.E., Ajogbasile F.V., Kayode A., Oguzie J., Olawoye I., Uwanibe J., Olumade T., Folarin O.A., Ihekweazu C., Happi C.T.                                                                           |                                                                                                                                                                                                                                                          |
| EPI_ISL_455422                                                                                                                                                                                                                                                                                                                                                                                                                                                                                                                                                                                                                                                                                                                                                                                                                                                                                                                                                                                                                                                                                                                                                                                                                                                                                                                                                                                                                                 | Nigeria Centre for Disease Control                             | African Centre of Excellence for Genomics of Infectious Diseases (ACEGID), Redeemer's University, Ede, Osun State, Nigeria | Oluniyi P.E., Ajogbasile F.V., Kayode A., Oguzie J., Olawoye I., Uwanibe J., Olumade T., Folarin O.A., Ihekweazu C., Happi C.T.                                                                           |                                                                                                                                                                                                                                                          |
| EPI_ISL_455423, EPI_ISL_455424, EPI_ISL_455425                                                                                                                                                                                                                                                                                                                                                                                                                                                                                                                                                                                                                                                                                                                                                                                                                                                                                                                                                                                                                                                                                                                                                                                                                                                                                                                                                                                                 | Nigeria Centre for Disease Control (NCDC)                      | African Centre of Excellence for Genomics of Infectious Diseases (ACEGID), Redeemer's University, Ede, Osun State, Nigeria | Oluniyi P.E., Ajogbasile F.V., Kayode A., Oguzie J., Olawoye I., Uwanibe J., Olumade T., Folarin O.A., Ihekweazu C., Happi C.T.                                                                           |                                                                                                                                                                                                                                                          |
| EPI_ISL_455426                                                                                                                                                                                                                                                                                                                                                                                                                                                                                                                                                                                                                                                                                                                                                                                                                                                                                                                                                                                                                                                                                                                                                                                                                                                                                                                                                                                                                                 | Nigeria Centre for Disease Control                             | African Centre of Excellence for Genomics of Infectious Diseases (ACEGID), Redeemer's University, Ede, Osun State, Nigeria | Oluniyi P.E., Ajogbasile F.V., Kayode A., Oguzie J., Olawoye I., Uwanibe J., Olumade T., Folarin O.A., Ihekweazu C., Happi C.T.                                                                           |                                                                                                                                                                                                                                                          |
| EPI_ISL_455427, EPI_ISL_455429, EPI_ISL_455430, EPI_ISL_455431                                                                                                                                                                                                                                                                                                                                                                                                                                                                                                                                                                                                                                                                                                                                                                                                                                                                                                                                                                                                                                                                                                                                                                                                                                                                                                                                                                                 | Nigeria Centre for Disease Control (NCDC)                      | African Centre of Excellence for Genomics of Infectious Diseases (ACEGID), Redeemer's University, Ede, Osun State, Nigeria | Oluniyi P.E., Ajogbasile F.V., Kayode A., Oguzie J., Olawoye I., Uwanibe J., Olumade T., Folarin O.A., Ihekweazu C., Happi C.T.                                                                           |                                                                                                                                                                                                                                                          |
| EPI_ISL_455629, EPI_ISL_455630, EPI_ISL_455631, EPI_ISL_455632, EPI_ISL_455633, EPI_ISL_455634, EPI_ISL_455635, EPI_ISL_455636, EPI_ISL_455637, EPI_ISL_455638, EPI_ISL_455639                                                                                                                                                                                                                                                                                                                                                                                                                                                                                                                                                                                                                                                                                                                                                                                                                                                                                                                                                                                                                                                                                                                                                                                                                                                                 | see above                                                      | KRISP, KZN Research Innovation and Sequencing Platform                                                                     | KRISP, KZN Research Innovation and Sequencing Platform                                                                                                                                                    | Giandhari J, Pillay S, Lessells R, Chimukangara B, Deforche K, Tegally H, Wilkinson E, de Oliveira T                                                                                                                                                     |
| EPI_ISL_457827, EPI_ISL_457828, EPI_ISL_457829, EPI_ISL_457830, EPI_ISL_457831, EPI_ISL_457832, EPI_ISL_457833, EPI_ISL_457834, EPI_ISL_457835, EPI_ISL_457836, EPI_ISL_457837, EPI_ISL_457838, EPI_ISL_457839, EPI_ISL_457840, EPI_ISL_457841, EPI_ISL_457842, EPI_ISL_457843, EPI_ISL_457844                                                                                                                                                                                                                                                                                                                                                                                                                                                                                                                                                                                                                                                                                                                                                                                                                                                                                                                                                                                                                                                                                                                                                 | see above                                                      | National Public Health Laboratory                                                                                          | KEMRI-Wellcome Trust Research Programme/KEMRI-CGMR-C Kilifi                                                                                                                                               | Githinji G. et al 2020                                                                                                                                                                                                                                   |
| EPI_ISL_457845, EPI_ISL_457846, EPI_ISL_457847, EPI_ISL_457848, EPI_ISL_457849, EPI_ISL_457850, EPI_ISL_457851, EPI_ISL_457852, EPI_ISL_457853, EPI_ISL_457854, EPI_ISL_457855, EPI_ISL_457856, EPI_ISL_457857, EPI_ISL_457858, EPI_ISL_457859, EPI_ISL_457860, EPI_ISL_457861, EPI_ISL_457862, EPI_ISL_457863, EPI_ISL_457864, EPI_ISL_457865, EPI_ISL_457866, EPI_ISL_457867, EPI_ISL_457868, EPI_ISL_457869, EPI_ISL_457870, EPI_ISL_457871, EPI_ISL_457872, EPI_ISL_457873, EPI_ISL_457874, EPI_ISL_457875, EPI_ISL_457876, EPI_ISL_457877, EPI_ISL_457878, EPI_ISL_457879, EPI_ISL_457880, EPI_ISL_457881, EPI_ISL_457882, EPI_ISL_457883, EPI_ISL_457884, EPI_ISL_457885, EPI_ISL_457886, EPI_ISL_457887, EPI_ISL_457888, EPI_ISL_457889, EPI_ISL_457890, EPI_ISL_457891, EPI_ISL_457892, EPI_ISL_457893, EPI_ISL_457894, EPI_ISL_457895, EPI_ISL_457896, EPI_ISL_457897, EPI_ISL_457898, EPI_ISL_457899, EPI_ISL_457900, EPI_ISL_457901, EPI_ISL_457902, EPI_ISL_457903, EPI_ISL_457904, EPI_ISL_457905, EPI_ISL_457906, EPI_ISL_457907, EPI_ISL_457908, EPI_ISL_457909, EPI_ISL_457910, EPI_ISL_457911, EPI_ISL_457912, EPI_ISL_457913, EPI_ISL_457914, EPI_ISL_457915, EPI_ISL_457916, EPI_ISL_457917, EPI_ISL_457918, EPI_ISL_457919, EPI_ISL_457920, EPI_ISL_457921, EPI_ISL_457922, EPI_ISL_457923, EPI_ISL_457924, EPI_ISL_457925, EPI_ISL_457926, EPI_ISL_457927, EPI_ISL_457928, EPI_ISL_457929, EPI_ISL_457930, EPI_ISL_457931 | see above                                                      | KEMRI-CGMR-C                                                                                                               | KEMRI-Wellcome Trust Research Programme/KEMRI-CGMR-C Kilifi                                                                                                                                               | Githinji G. et al 2020                                                                                                                                                                                                                                   |
| EPI_ISL_457932, EPI_ISL_457933, EPI_ISL_457934, EPI_ISL_457935, EPI_ISL_457936                                                                                                                                                                                                                                                                                                                                                                                                                                                                                                                                                                                                                                                                                                                                                                                                                                                                                                                                                                                                                                                                                                                                                                                                                                                                                                                                                                 |                                                                | KEMRI-Centre for Virus Research                                                                                            | KEMRI-Wellcome Trust Research Programme/KEMRI-CGMR-C Kilifi                                                                                                                                               | Githinji G. et al 2020                                                                                                                                                                                                                                   |
| EPI_ISL_457999                                                                                                                                                                                                                                                                                                                                                                                                                                                                                                                                                                                                                                                                                                                                                                                                                                                                                                                                                                                                                                                                                                                                                                                                                                                                                                                                                                                                                                 | Centre For Biotechnology Research and Development              | Centre For Biotechnology Research and Development                                                                          |                                                                                                                                                                                                           | Matoke-Muhia,D., Symeker,S.L., Muuo,S.N., Ochwoto,M., Zablon,J.O., Kimotho,J., Waruhiu,C.N. and Michuki,G.N.                                                                                                                                             |
| EPI_ISL_458000                                                                                                                                                                                                                                                                                                                                                                                                                                                                                                                                                                                                                                                                                                                                                                                                                                                                                                                                                                                                                                                                                                                                                                                                                                                                                                                                                                                                                                 | Centre For Biotechnology Research and Development              | Centre For Biotechnology Research and Development                                                                          |                                                                                                                                                                                                           | Matoke-Muhia,D.K., Symeker,S.L., Muuo,S.N., Ochwoto,M., Zablon,J.O., Kimotho,J., Waruhiu,C.N. and Michuki,G.N.                                                                                                                                           |
| EPI_ISL_458150                                                                                                                                                                                                                                                                                                                                                                                                                                                                                                                                                                                                                                                                                                                                                                                                                                                                                                                                                                                                                                                                                                                                                                                                                                                                                                                                                                                                                                 | ANOUAL                                                         | ANOUAL                                                                                                                     | Jouali Farah, El Ansari Fatima Zahra, Marchoudi Nabila, Kasmi Yassine, Chenaoui Mohamed, El Aliani Aissam, Benhida Rachid, Azami Nawfel, Kitane Driss Lahlou, Loukman Salma, Fekkak Jamal                 |                                                                                                                                                                                                                                                          |
| EPI_ISL_458285, EPI_ISL_458286                                                                                                                                                                                                                                                                                                                                                                                                                                                                                                                                                                                                                                                                                                                                                                                                                                                                                                                                                                                                                                                                                                                                                                                                                                                                                                                                                                                                                 | unknown                                                        | Bundeswehr Institute of Microbiology                                                                                       | Handrick,S., Bestehorn-Willmann,M.S., Eckstein,S., Walter,M.C., Antwerpen,M.H., Rehn,A., Najia,H., Stoecker,K., Woelfel,R. and Ben Moussa.M.                                                              |                                                                                                                                                                                                                                                          |
| EPI_ISL_458287                                                                                                                                                                                                                                                                                                                                                                                                                                                                                                                                                                                                                                                                                                                                                                                                                                                                                                                                                                                                                                                                                                                                                                                                                                                                                                                                                                                                                                 | Biosafety Department PCL3                                      | Biosafety Department PCL3                                                                                                  | Lemriss,S., Souiri,A. and El Kabbaj,S.                                                                                                                                                                    |                                                                                                                                                                                                                                                          |
| EPI_ISL_459965, EPI_ISL_459966, EPI_ISL_459967, EPI_ISL_459968, EPI_ISL_459969, EPI_ISL_459970, EPI_ISL_459971, EPI_ISL_459972, EPI_ISL_459973, EPI_ISL_459974, EPI_ISL_459975, EPI_ISL_459976, EPI_ISL_459977, EPI_ISL_459978, EPI_ISL_459979, EPI_ISL_459980, EPI_ISL_459981, EPI_ISL_459982, EPI_ISL_459983, EPI_ISL_459984                                                                                                                                                                                                                                                                                                                                                                                                                                                                                                                                                                                                                                                                                                                                                                                                                                                                                                                                                                                                                                                                                                                 | see above                                                      | Institut Pasteur du Maroc                                                                                                  | Institut Pasteur du Maroc                                                                                                                                                                                 | Marion Barbet, Sylvie Behillil, Méline Bizard, Angela Brisebarre, Camille Capel, Etienne Simon-Lorière, Vincent Enouf, Maud Vanpeene, Sylvie van der Werf, Latifa Anga, Abdellah Faouzi, Anass Abbad, Mjid Eloualid, Jalal Nouril, Anderrahmane Maaroufi |
| EPI_ISL_462992                                                                                                                                                                                                                                                                                                                                                                                                                                                                                                                                                                                                                                                                                                                                                                                                                                                                                                                                                                                                                                                                                                                                                                                                                                                                                                                                                                                                                                 | Nigerian Institute of Medical Research                         | Nigerian Institute of Medical Research                                                                                     | Saibu,J.O., Onwuamah,C.K., Okwuraiwe,A.P., Amoo,O.S., Salu,O.B., Ige,F.A., Liboro,G., Odewale,E., Adesegun,A., Abosede,O., Ahmed,R., Sokei,J., Oyefolu,A., Adegbola,R., Salako,B., Omilabu,S. and Audu,R. |                                                                                                                                                                                                                                                          |
| EPI_ISL_463001, EPI_ISL_463002, EPI_ISL_463003, EPI_ISL_463004, EPI_ISL_463005, EPI_ISL_463006                                                                                                                                                                                                                                                                                                                                                                                                                                                                                                                                                                                                                                                                                                                                                                                                                                                                                                                                                                                                                                                                                                                                                                                                                                                                                                                                                 | unknown                                                        | Clinical virology                                                                                                          | Fares,W., Triki,H.                                                                                                                                                                                        |                                                                                                                                                                                                                                                          |
| EPI_ISL_464112, EPI_ISL_464113, EPI_ISL_464114, EPI_ISL_464115, EPI_ISL_464116, EPI_ISL_464117, EPI_ISL_464118, EPI_ISL_464119, EPI_ISL_464120, EPI_ISL_464121, EPI_ISL_464122, EPI_ISL_464123, EPI_ISL_464124, EPI_ISL_464125, EPI_ISL_464126, EPI_ISL_464127, EPI_ISL_464128, EPI_ISL_464129, EPI_ISL_464130, EPI_ISL_464131, EPI_ISL_464132, EPI_ISL_464133                                                                                                                                                                                                                                                                                                                                                                                                                                                                                                                                                                                                                                                                                                                                                                                                                                                                                                                                                                                                                                                                                 | see above                                                      | National Health Laboratory Service (NHLS), Tygerberg                                                                       | Division of Medical Virology, Stellenbosch University and National Health Laboratory Service (NHLS)                                                                                                       | Susan Engelbrecht, Kayla Delaney, Bronwyn Kleinhans, Houriyah Tegally, Eduan Wilkinton, Gert van Zyl, Wolfgang Preiser, Tulio de Oliveira                                                                                                                |
| EPI_ISL_464134                                                                                                                                                                                                                                                                                                                                                                                                                                                                                                                                                                                                                                                                                                                                                                                                                                                                                                                                                                                                                                                                                                                                                                                                                                                                                                                                                                                                                                 | National Health Laboratory Service (NHLS), Tygerberg           | Stellenbosch University and NHLS                                                                                           | Susan Engelbrecht, Kayla Delaney, Bronwyn Kleinhans, Houriyah Tegally, Eduan Wilkinton, Gert van Zyl, Wolfgang Preiser, Tulio de Oliveira                                                                 |                                                                                                                                                                                                                                                          |
| EPI_ISL_464135, EPI_ISL_464136, EPI_ISL_464137, EPI_ISL_464138, EPI_ISL_464139, EPI_ISL_464140, EPI_ISL_464141, EPI_ISL_464142, EPI_ISL_464143, EPI_ISL_464144, EPI_ISL_464145, EPI_ISL_464146, EPI_ISL_464147, EPI_ISL_464148, EPI_ISL_464149, EPI_ISL_464150, EPI_ISL_464151, EPI_ISL_464152, EPI_ISL_464153, EPI_ISL_464154, EPI_ISL_464155, EPI_ISL_464156, EPI_ISL_464157, EPI_ISL_464158                                                                                                                                                                                                                                                                                                                                                                                                                                                                                                                                                                                                                                                                                                                                                                                                                                                                                                                                                                                                                                                 | see above                                                      | National Health Laboratory Service (NHLS), Tygerberg                                                                       | Division of Medical Virology, Stellenbosch University and National Health Laboratory Service (NHLS)                                                                                                       | Susan Engelbrecht, Kayla Delaney, Bronwyn Kleinhans, Houriyah Tegally, Eduan Wilkinton, Gert van Zyl, Wolfgang Preiser, Tulio de Oliveira                                                                                                                |
| EPI_ISL_467299                                                                                                                                                                                                                                                                                                                                                                                                                                                                                                                                                                                                                                                                                                                                                                                                                                                                                                                                                                                                                                                                                                                                                                                                                                                                                                                                                                                                                                 | Research and Medical Analysis Laboratory of Gendarmerie Royale | Research and Medical Analysis Laboratory of Gendarmerie Royale                                                             | Sanaâ LEMRISS Amal SOUIRI Hicham EL OSSMANI Saâd EL Kabbaj                                                                                                                                                |                                                                                                                                                                                                                                                          |
| EPI_ISL_467431                                                                                                                                                                                                                                                                                                                                                                                                                                                                                                                                                                                                                                                                                                                                                                                                                                                                                                                                                                                                                                                                                                                                                                                                                                                                                                                                                                                                                                 | Molecular Diagnostics Services (MDS)                           | KRISP, KZN Research Innovation and Sequencing Platform                                                                     | Giandhari J, Pillay S, Lessells R, Chimukangara B, Mdlalose K, York D, Khan S, Tegally H, Wilkinson E, de Oliveira T                                                                                      |                                                                                                                                                                                                                                                          |
| EPI_ISL_467432, EPI_ISL_467433, EPI_ISL_467434, EPI_ISL_467435                                                                                                                                                                                                                                                                                                                                                                                                                                                                                                                                                                                                                                                                                                                                                                                                                                                                                                                                                                                                                                                                                                                                                                                                                                                                                                                                                                                 | AMPATH-DBN                                                     | KRISP, KZN Research Innovation and Sequencing Platform                                                                     | Giandhari J, Pillay S, Lessells R, Chimukangara B, Mdlalose K, York D, Khan S, Tegally H, Wilkinson E, de Oliveira T                                                                                      |                                                                                                                                                                                                                                                          |
| EPI_ISL_467436, EPI_ISL_467437, EPI_ISL_467438, EPI_ISL_467439, EPI_ISL_467440, EPI_ISL_467441, EPI_ISL_467442, EPI_ISL_467443                                                                                                                                                                                                                                                                                                                                                                                                                                                                                                                                                                                                                                                                                                                                                                                                                                                                                                                                                                                                                                                                                                                                                                                                                                                                                                                 | NHLS-IALCH                                                     | KRISP, KZN Research Innovation and Sequencing Platform                                                                     | Giandhari J, Pillay S, Lessells R, Chimukangara B, Mdlalose K, York D, Khan S, Tegally H, Wilkinson E, de Oliveira T                                                                                      |                                                                                                                                                                                                                                                          |

|                                                                                                                                                                                                                                                                                                                                                                                                                                |                                                                                        |                                                                                                                                    |                                                                                                                                                                                                                                                                                                                                                        |
|--------------------------------------------------------------------------------------------------------------------------------------------------------------------------------------------------------------------------------------------------------------------------------------------------------------------------------------------------------------------------------------------------------------------------------|----------------------------------------------------------------------------------------|------------------------------------------------------------------------------------------------------------------------------------|--------------------------------------------------------------------------------------------------------------------------------------------------------------------------------------------------------------------------------------------------------------------------------------------------------------------------------------------------------|
| EPI_ISL_467444, EPI_ISL_467445, EPI_ISL_467446, EPI_ISL_467447, EPI_ISL_467448                                                                                                                                                                                                                                                                                                                                                 | Molecular Diagnostics Services (MDS)                                                   | KRISP, KZN Research Innovation and Sequencing Platform                                                                             | Giandhari J, Pillay S, Lessells R, Chimukangara B, Mdlalose K, York D, Khan S, Tegally H, Wilkinson E, de Oliveira T                                                                                                                                                                                                                                   |
| EPI_ISL_467449, EPI_ISL_467450, EPI_ISL_467451, EPI_ISL_467452, EPI_ISL_467453, EPI_ISL_467454, EPI_ISL_467455, EPI_ISL_467456, EPI_ISL_467457, EPI_ISL_467458, EPI_ISL_467459, EPI_ISL_467460, EPI_ISL_467461, EPI_ISL_467462, EPI_ISL_467463, EPI_ISL_467464, EPI_ISL_467465, EPI_ISL_467466, EPI_ISL_467467, EPI_ISL_467468, EPI_ISL_467469, EPI_ISL_467470, EPI_ISL_467471, EPI_ISL_467472, EPI_ISL_467473, EPI_ISL_467474 | AMPATH-DBN                                                                             | KRISP, KZN Research Innovation and Sequencing Platform                                                                             | Giandhari J, Pillay S, Lessells R, Chimukangara B, Mdlalose K, York D, Khan S, Tegally H, Wilkinson E, de Oliveira T                                                                                                                                                                                                                                   |
| see above                                                                                                                                                                                                                                                                                                                                                                                                                      | Molecular Diagnostics Services (MDS)                                                   | KRISP, KZN Research Innovation and Sequencing Platform                                                                             | Giandhari J, Pillay S, Lessells R, Chimukangara B, Mdlalose K, York D, Khan S, Tegally H, Wilkinson E, de Oliveira T                                                                                                                                                                                                                                   |
| EPI_ISL_467475, EPI_ISL_467476, EPI_ISL_467477, EPI_ISL_467478, EPI_ISL_467479, EPI_ISL_467480, EPI_ISL_467481, EPI_ISL_467482, EPI_ISL_467483, EPI_ISL_467484, EPI_ISL_467485, EPI_ISL_467486, EPI_ISL_467487, EPI_ISL_467488, EPI_ISL_467489, EPI_ISL_467490, EPI_ISL_467491                                                                                                                                                 | NHLS-IALCH                                                                             | KRISP, KZN Research Innovation and Sequencing Platform                                                                             | Giandhari J, Pillay S, Lessells R, Chimukangara B, Mdlalose K, York D, Khan S, Tegally H, Wilkinson E, de Oliveira T                                                                                                                                                                                                                                   |
| see above                                                                                                                                                                                                                                                                                                                                                                                                                      | Molecular Diagnostics Services (MDS)                                                   | KRISP, KZN Research Innovation and Sequencing Platform                                                                             | Giandhari J, Pillay S, Lessells R, Chimukangara B, Mdlalose K, York D, Khan S, Tegally H, Wilkinson E, de Oliveira T                                                                                                                                                                                                                                   |
| EPI_ISL_467492, EPI_ISL_467493                                                                                                                                                                                                                                                                                                                                                                                                 | NHLS-IALCH                                                                             | KRISP, KZN Research Innovation and Sequencing Platform                                                                             | Giandhari J, Pillay S, Lessells R, Chimukangara B, Mdlalose K, York D, Khan S, Tegally H, Wilkinson E, de Oliveira T                                                                                                                                                                                                                                   |
| EPI_ISL_467494, EPI_ISL_467495, EPI_ISL_467496, EPI_ISL_467497, EPI_ISL_467498, EPI_ISL_467499, EPI_ISL_467500, EPI_ISL_467501, EPI_ISL_467502, EPI_ISL_467503, EPI_ISL_467504, EPI_ISL_467505, EPI_ISL_467506                                                                                                                                                                                                                 | Molecular Diagnostics Services (MDS)                                                   | KRISP, KZN Research Innovation and Sequencing Platform                                                                             | Giandhari J, Pillay S, Lessells R, Chimukangara B, Mdlalose K, York D, Khan S, Tegally H, Wilkinson E, de Oliveira T                                                                                                                                                                                                                                   |
| see above                                                                                                                                                                                                                                                                                                                                                                                                                      | NHLS-IALCH                                                                             | KRISP, KZN Research Innovation and Sequencing Platform                                                                             | Giandhari J, Pillay S, Lessells R, Chimukangara B, Mdlalose K, York D, Khan S, Tegally H, Wilkinson E, de Oliveira T                                                                                                                                                                                                                                   |
| EPI_ISL_467507, EPI_ISL_467508, EPI_ISL_467509, EPI_ISL_467510, EPI_ISL_467511, EPI_ISL_467512, EPI_ISL_467513, EPI_ISL_467514, EPI_ISL_467515                                                                                                                                                                                                                                                                                 | CAPRISA                                                                                | KRISP, KZN Research Innovation and Sequencing Platform                                                                             | Giandhari J, Pillay S, Lessells R, Chimukangara B, Mdlalose K, York D, Khan S, Tegally H, Wilkinson E, de Oliveira T                                                                                                                                                                                                                                   |
| EPI_ISL_467516                                                                                                                                                                                                                                                                                                                                                                                                                 | NHLS-IALCH                                                                             | KRISP, KZN Research Innovation and Sequencing Platform                                                                             | Giandhari J, Pillay S, Lessells R, Chimukangara B, Mdlalose K, York D, Khan S, Tegally H, Wilkinson E, de Oliveira T                                                                                                                                                                                                                                   |
| EPI_ISL_467517, EPI_ISL_467518, EPI_ISL_467519, EPI_ISL_467520, EPI_ISL_467521, EPI_ISL_467522, EPI_ISL_467523, EPI_ISL_467524                                                                                                                                                                                                                                                                                                 |                                                                                        |                                                                                                                                    |                                                                                                                                                                                                                                                                                                                                                        |
| EPI_ISL_468044, EPI_ISL_468045, EPI_ISL_468046, EPI_ISL_468047, EPI_ISL_468048, EPI_ISL_468049, EPI_ISL_468050, EPI_ISL_468051, EPI_ISL_468052, EPI_ISL_468053, EPI_ISL_468054, EPI_ISL_468055                                                                                                                                                                                                                                 | see above                                                                              | Egyptian National Cancer Institute (ENCI)                                                                                          | Zekri, Abdel Rahman N, Amer,K.E., Ahmed,O.S., Soliman,H.K., Hafez,M.M., Bahnassy,A.A., Abdelhamid,W., Gad,A., Ali,M., Hassan,W., Samir,M., Raouf,A., Hamdy,M.S., Soliman,M.S., Elsissey,M.H., Elkhateeb,S.M., Ezzelarab,M.H., Abouelhoda, Mohamed                                                                                                      |
| EPI_ISL_468056                                                                                                                                                                                                                                                                                                                                                                                                                 | Egyptian National Cancer Institute (ENCI)                                              | Egyptian National Cancer Institute (ENCI)                                                                                          | Zekri, Abdel Rahman N, Amer,K.E., Ahmed,O.S., Soliman,H.K., Aii,M.A., Hassan,W.A., Mahmoud,A.A., Khattab,A.A., Hafez,M.M., Abouelhoda, Mohamed                                                                                                                                                                                                         |
| EPI_ISL_468057, EPI_ISL_468058, EPI_ISL_468059                                                                                                                                                                                                                                                                                                                                                                                 | Egyptian National Cancer Institute (ENCI)                                              | Egyptian National Cancer Institute (ENCI)                                                                                          | Zekri, Abdel Rahman N, Amer,K.E., Ahmed,O.S., Soliman,H.K., Hafez,M.M., Bahnassy,A.A., Abdelhamid,W., Gad,A., Ali,M., Hassan,W., Samir,M., Raouf,A., Hamdy,M.S., Soliman,M.S., Elsissey,M.H., Elkhateeb,S.M., Ezzelarab,M.H., Abouelhoda, Mohamed                                                                                                      |
| EPI_ISL_468060, EPI_ISL_468061, EPI_ISL_468062                                                                                                                                                                                                                                                                                                                                                                                 | Egyptian National Cancer Institute (ENCI)                                              | Egyptian National Cancer Institute (ENCI)                                                                                          | Zekri, Abdel Rahman N, Amer,K.E., Ahmed,O.S., Soliman,H.K., Aii,M.A., Hassan,W.A., Mahmoud,A.A., Khattab,A.A., Hafez,M.M., Abouelhoda, Mohamed                                                                                                                                                                                                         |
| EPI_ISL_469017, EPI_ISL_469049, EPI_ISL_469051, EPI_ISL_469052, EPI_ISL_469053, EPI_ISL_469054                                                                                                                                                                                                                                                                                                                                 | LNR National Reference Laboratory, Mohammed VI University of Health Sciences           | Medical Biotechnology Laboratory, Rabat Medical and Pharmacy School, Mohammed The Vth University in Rabat                          | Meriem LAAMARTI, Souad KARTTI, Rokaia LAAMRTI , M.W. CHEMAO-ELFHIRI, Loubna ALLAM, Mouna OUADGHIRI, Imane SMYEJ, Jalila RAHOUI, Houda BENRAHMA, Jalil El Atar, Idrissa Diawara, Rachid EL JAOUDI, Laila SBABOU, Chakib NEJJARI, Saaid AMZAZI, Rachid MENTAG, Lahcen BELYAMANI and Azeddine IBRAHIMI                                                    |
| EPI_ISL_469275                                                                                                                                                                                                                                                                                                                                                                                                                 | Egyptian National Cancer Institute (ENCI)                                              | Human Genome Center                                                                                                                | Zekri, Abdel Rahman N, Amer,K.E., Ahmed,O.S., Soliman,H.K., Hafez,M.M., Bahnassy,A.A., Abdelhamid,W., Gad,A., Ali,M., Hassan,W., Samir,M., Raouf,A., Hamdy,M.S., Soliman,M.S., Elsissey,M.H., Elkhateeb,S.M., Ezzelarab,M.H., Abouelhoda, Mohamed                                                                                                      |
| EPI_ISL_470878, EPI_ISL_470879, EPI_ISL_470880                                                                                                                                                                                                                                                                                                                                                                                 | National Institute for Communicable Diseases of the National Health Laboratory Service | National Institute for Communicable Diseases of the National Health Laboratory Service                                             | Allam M, Ismail A, Khumalo Z, Kwenda S, van Heusden P, Mtshali P, Mnyameni F, Mohale T, Subramoney K, Bhiman JN                                                                                                                                                                                                                                        |
| EPI_ISL_471158, EPI_ISL_471159, EPI_ISL_471160, EPI_ISL_471161, EPI_ISL_471162, EPI_ISL_471163, EPI_ISL_471164, EPI_ISL_471165, EPI_ISL_471166, EPI_ISL_471167, EPI_ISL_471168, EPI_ISL_471169, EPI_ISL_471170, EPI_ISL_471171                                                                                                                                                                                                 | see above                                                                              | MRCG at LSHTM Genomics lab                                                                                                         | Sesay et al                                                                                                                                                                                                                                                                                                                                            |
| EPI_ISL_471396, EPI_ISL_471397, EPI_ISL_471398, EPI_ISL_471399, EPI_ISL_471400, EPI_ISL_471401, EPI_ISL_471402, EPI_ISL_471403, EPI_ISL_471404, EPI_ISL_471405, EPI_ISL_471406, EPI_ISL_471407, EPI_ISL_471408, EPI_ISL_471409, EPI_ISL_471410, EPI_ISL_471411, EPI_ISL_471412, EPI_ISL_471413, EPI_ISL_471414, EPI_ISL_471415                                                                                                 | see above                                                                              | Viral Respiratory Lab, National Institute for Biomedical Research (INRB)                                                           | Placide Mbala-Kingebeni, Edith Nkwembe, Eddy Kinganda-Lusamaki, Amuri Aziza, Francisca Muyembe Mawete, Catherine Pratt, Matthias Pauthe, Josh Quick, Allison Black, James Hadfield, Trevor Bedford, Ian Goodfellow, Andrew Rambaut, Nick Loman, Kristian Andersen, Michael Weibull, Steve Ahuka-Mundeke, Jean-Jacques Muyembe Tamfum                   |
| EPI_ISL_471456, EPI_ISL_471457, EPI_ISL_471458, EPI_ISL_471459, EPI_ISL_471460                                                                                                                                                                                                                                                                                                                                                 | Centre de Virologie des Maladies Tropicales                                            | Functional Genomic Platform/Service Analyses Biologique/UATRS/ Centre National Pour la Recherche Scientifique Et Technique (CNRST) | Hicham EL ANNAZ, Elmoustafa EL FAHIME, Marouane MELLOUL, Youssef AKHOUD, Mily Abdelaziz ELALAOUI, Ahmed REGGAD, Sanaa ALAOUI-Amine, Rachid ABI, Rida TAGAJDID, Zohour KASMY, Safae ELKOCHE, Nadia TOULI, Farida HILALI, Abdelkader LAATIRIS, Abdelillah LARAQI, Tahar BAJOUJ, Yassine SEKHSOKH , Idriss-Amine LAHLOU, Mostafa ELOUENASS, Khalid ENNIBI |
| EPI_ISL_475722, EPI_ISL_475723, EPI_ISL_475724                                                                                                                                                                                                                                                                                                                                                                                 | Egyptian National Cancer Institute (ENCI)                                              | Egyptian National Cancer Institute (ENCI)                                                                                          | Zekri, Abdel Rahman N, Amer,K.E., Ahmed,O.S., Soliman,H.K., Hafez,M.M., Bahnassy,A.A., Abdelhamid,W., Gad,A., Ali,M., Hassan,W., Samir,M., Raouf,A., Hamdy,M.S., Soliman,M.S., Elsissey,M.H., Elkhateeb,S.M., Ezzelarab,M.H., Abouelhoda, Mohamed                                                                                                      |
| EPI_ISL_475745, EPI_ISL_475746, EPI_ISL_475747, EPI_ISL_475748, EPI_ISL_475749, EPI_ISL_475750, EPI_ISL_475751, EPI_ISL_475752, EPI_ISL_475753                                                                                                                                                                                                                                                                                 | Medical Ain Shams Research Institute (MASRI), Ain Shams University                     | Medical Ain Shams Research Institute (MASRI), Ain Shams University                                                                 | Hesham Elghazaly , Sara Hassan Agwa, Mahmoud Elmeteini , Ahmad Moustafa , Ashraf Omar, Osama Mansour, Samia Abdo, Hala Hafez, Ghada Ismael , Shaimaa Moustafa , Aya Mohamed, Reham Marmdouh , Hoda Abd Elsatar, Manal Hamdy Elsaïd, Fatma Ebied                                                                                                        |
| EPI_ISL_476024                                                                                                                                                                                                                                                                                                                                                                                                                 | Laboratoire de Recherche et d'Analyses Médicales de la Gendarmerie Royale              | Laboratoire de Recherche et d'Analyses Médicales de la Gendarmerie Royale                                                          | Sanaâ Lemriss, Amal SOUIRI, Nabil Lemzaoui, Omar Mestoui, Mohamed Labioui, Nabil Ouaariba, Ayoub Jibjibe, Mahmoud Yartaoui, Mohamed Chahmi, Marouane El Rhouila, Samiha Sellak, Nadia Kandoussi, Saâd El Kabbaj.                                                                                                                                       |
| EPI_ISL_476025                                                                                                                                                                                                                                                                                                                                                                                                                 | Laboratoire de Recherche et d'Analyses Médicales de la Gendarmerie Royale              | Laboratoire de Recherche et d'Analyses Médicales de la Gendarmerie Royale                                                          | Sanaâ LEMRISS, Amal Souiri, Saâd EL KABBAAJ                                                                                                                                                                                                                                                                                                            |
| EPI_ISL_476026                                                                                                                                                                                                                                                                                                                                                                                                                 | Laboratoire de Recherche et d'Analyses Médicales de la Gendarmerie Royale              | Laboratoire de Recherche et d'Analyses Médicales de la Gendarmerie Royale                                                          | Sanaâ Lemriss, Amal SOUIRI, Saâd EL KABBAAJ                                                                                                                                                                                                                                                                                                            |
| EPI_ISL_476148, EPI_ISL_476149                                                                                                                                                                                                                                                                                                                                                                                                 | Institut Pasteur Dakar                                                                 | Institut Pasteur de Dakar                                                                                                          | Ndongo Dia, Moussa Moise Diagne, Mamadou Diop, Ousmane Faye, Amadou Alpha Sall                                                                                                                                                                                                                                                                         |
| EPI_ISL_476150                                                                                                                                                                                                                                                                                                                                                                                                                 | Institut Pasteur Dakar                                                                 | Institut Pasteur de Dakar                                                                                                          | Ndongo Dia, Moussa Moise Diagne, Mamadou diop, Ousmane Faye, Amadou Alpha Sall                                                                                                                                                                                                                                                                         |
| EPI_ISL_476151                                                                                                                                                                                                                                                                                                                                                                                                                 | Institut Pasteur Dakar                                                                 | Institut Pasteur de Dakar                                                                                                          | Ndongo Dia, Moussa Moise Diagne, Mamadou Diop, Ousmane faye, Amadou Alpha Sall                                                                                                                                                                                                                                                                         |
| EPI_ISL_476491, EPI_ISL_476492                                                                                                                                                                                                                                                                                                                                                                                                 | Institut Pasteur Dakar                                                                 | Institut Pasteur de Dakar                                                                                                          | Ndongo Dia, Moussa Moise Diagne, Mamadou Diop, Ousmane Faye, Amadou Alpha Sall                                                                                                                                                                                                                                                                         |
| EPI_ISL_476493                                                                                                                                                                                                                                                                                                                                                                                                                 | Institut Pasteur Dakar                                                                 | Institut Pasteur de Dakar                                                                                                          | Ndongo Dia, Moussa Moise Diagne, Mamadou Diop, Ousmane Faye, Amadou alpha Sall                                                                                                                                                                                                                                                                         |
| EPI_ISL_476494                                                                                                                                                                                                                                                                                                                                                                                                                 | Institut Pasteur Dakar                                                                 | Institut Pasteur de Dakar                                                                                                          | Ndongo Dia, Moussa Moise Diagne, Mamadou Diop, Ousmane Faye, Amadou Alpha Sall                                                                                                                                                                                                                                                                         |
| EPI_ISL_476495, EPI_ISL_476497                                                                                                                                                                                                                                                                                                                                                                                                 | Institut Pasteur Dakar                                                                 | Institut Pasteur de Dakar                                                                                                          | Ndongo Dia, Moussa Moise Diagne, Mamadou Diop, Ousmane Faye, Amadou alpha Sall                                                                                                                                                                                                                                                                         |
| EPI_ISL_476514                                                                                                                                                                                                                                                                                                                                                                                                                 | Institut Pasteur Dakar                                                                 | Institut Pasteur de Dakar                                                                                                          | Ndongo Dia, Moussa Moise Diagne, Mamadou Diop, Ousmane Faye, Amadou Alpha Sall                                                                                                                                                                                                                                                                         |
| EPI_ISL_476515                                                                                                                                                                                                                                                                                                                                                                                                                 | Institut Pasteur Dakar                                                                 | Institut Pasteur de Dakar                                                                                                          | Ndongo Dia, Moussa Moise Diagne, Mamadou diop, Ousmane Faye, Amadou alpha Sall                                                                                                                                                                                                                                                                         |
| EPI_ISL_476516                                                                                                                                                                                                                                                                                                                                                                                                                 | Institut Pasteur Dakar                                                                 | Institut Pasteur de Dakar                                                                                                          | Ndongo Dia, Moussa Moise Diagne, mamadou Diop, Ousmane Faye, Amadou Alpha Sall                                                                                                                                                                                                                                                                         |

|                                                                                                                                                                                                                                                                                                                                                                                                                                                                                                                                                                                                                                                                                                                                |                                                                              |                                                                                                           |                                                                                                                                                                                                                                                                                                      |
|--------------------------------------------------------------------------------------------------------------------------------------------------------------------------------------------------------------------------------------------------------------------------------------------------------------------------------------------------------------------------------------------------------------------------------------------------------------------------------------------------------------------------------------------------------------------------------------------------------------------------------------------------------------------------------------------------------------------------------|------------------------------------------------------------------------------|-----------------------------------------------------------------------------------------------------------|------------------------------------------------------------------------------------------------------------------------------------------------------------------------------------------------------------------------------------------------------------------------------------------------------|
| EPI_ISL_476558, EPI_ISL_476560, EPI_ISL_476562                                                                                                                                                                                                                                                                                                                                                                                                                                                                                                                                                                                                                                                                                 | Institut Pasteur Dakar                                                       | Institut Pasteur de Dakar                                                                                 | Ndongo Dia, Moussa Moise Diagne, Mamadou Diop, Ousmane Faye, Amadou Alpha Sall                                                                                                                                                                                                                       |
| EPI_ISL_476564                                                                                                                                                                                                                                                                                                                                                                                                                                                                                                                                                                                                                                                                                                                 | Institut Pasteur Dakar                                                       | Institut Pasteur de Dakar                                                                                 | Ndongo Dia, Moussa Moise Diagne, Mamadou diop, Ousmane Faye, Amadou alpha Sall                                                                                                                                                                                                                       |
| EPI_ISL_476566                                                                                                                                                                                                                                                                                                                                                                                                                                                                                                                                                                                                                                                                                                                 | Institut Pasteur Dakar                                                       | Institut Pasteur de Dakar                                                                                 | Ndongo Dia, Moussa Moise Diagne, Mamadou Diop, Ousmane Faye, Amadou Alpha Sall                                                                                                                                                                                                                       |
| EPI_ISL_476569                                                                                                                                                                                                                                                                                                                                                                                                                                                                                                                                                                                                                                                                                                                 | Institut Pasteur Dakar                                                       | Institut Pasteur de Dakar                                                                                 | Ndongo Dia, Moussa Moise, Mamadou Diop, Ousmane Faye, Amadou Alpha Sall                                                                                                                                                                                                                              |
| EPI_ISL_476570, EPI_ISL_476572, EPI_ISL_476574                                                                                                                                                                                                                                                                                                                                                                                                                                                                                                                                                                                                                                                                                 | Institut Pasteur Dakar                                                       | Institut Pasteur de Dakar                                                                                 | Ndongo Dia, Moussa Moise Diagne, Mamadou Diop, Ousmane Faye, Amadou Alpha Sall                                                                                                                                                                                                                       |
| EPI_ISL_476822, EPI_ISL_476823, EPI_ISL_476824, EPI_ISL_476825, EPI_ISL_476826, EPI_ISL_476827, EPI_ISL_476828, EPI_ISL_476829, EPI_ISL_476830, EPI_ISL_476831, EPI_ISL_476833, EPI_ISL_476834                                                                                                                                                                                                                                                                                                                                                                                                                                                                                                                                 |                                                                              |                                                                                                           |                                                                                                                                                                                                                                                                                                      |
| see above                                                                                                                                                                                                                                                                                                                                                                                                                                                                                                                                                                                                                                                                                                                      | Laboratoire des Fièvres Hémostatiques Virales du Benin                       | Charité-Universitätsmedizin Berlin                                                                        | Yadouleton, Angès; Sander Anna-Lena; Moreira-Soto Andres; Drexler, Jan Felix                                                                                                                                                                                                                         |
| EPI_ISL_477141, EPI_ISL_477142, EPI_ISL_477143, EPI_ISL_477144, EPI_ISL_477145, EPI_ISL_477146, EPI_ISL_477147, EPI_ISL_477148, EPI_ISL_477149, EPI_ISL_477150, EPI_ISL_477151, EPI_ISL_477152, EPI_ISL_477153, EPI_ISL_477154, EPI_ISL_477155, EPI_ISL_477156, EPI_ISL_477157, EPI_ISL_477158, EPI_ISL_477159                                                                                                                                                                                                                                                                                                                                                                                                                 |                                                                              |                                                                                                           |                                                                                                                                                                                                                                                                                                      |
| see above                                                                                                                                                                                                                                                                                                                                                                                                                                                                                                                                                                                                                                                                                                                      | Institut Pasteur Dakar                                                       | Institut Pasteur de Dakar                                                                                 | Ndongo Dia, Moussa Moise Diagne, Mamadou Diop, Mamadou Malado Jallow, Marie Henriette Dior Ndione, Safietou Sankhe, Ousmane Faye, Amadou Alpha Sall.                                                                                                                                                 |
| EPI_ISL_477161, EPI_ISL_476872, EPI_ISL_479686, EPI_ISL_479687, EPI_ISL_479688, EPI_ISL_479689, EPI_ISL_479690, EPI_ISL_479691, EPI_ISL_479692, EPI_ISL_479693, EPI_ISL_479694, EPI_ISL_479695, EPI_ISL_479696, EPI_ISL_479697, EPI_ISL_479698, EPI_ISL_479699, EPI_ISL_479700, EPI_ISL_479701, EPI_ISL_479702, EPI_ISL_479703, EPI_ISL_479704, EPI_ISL_479705, EPI_ISL_479706, EPI_ISL_479707, EPI_ISL_479708, EPI_ISL_479709, EPI_ISL_479710, EPI_ISL_479711, EPI_ISL_479712, EPI_ISL_479713, EPI_ISL_479714, EPI_ISL_479715, EPI_ISL_479716, EPI_ISL_479717, EPI_ISL_479718, EPI_ISL_479719, EPI_ISL_479720, EPI_ISL_479721, EPI_ISL_479722, EPI_ISL_479723, EPI_ISL_479724, EPI_ISL_479725, EPI_ISL_479726, EPI_ISL_479727 |                                                                              |                                                                                                           |                                                                                                                                                                                                                                                                                                      |
| see above                                                                                                                                                                                                                                                                                                                                                                                                                                                                                                                                                                                                                                                                                                                      | Egyptian National Cancer Institute (ENCI)                                    | Egyptian National Cancer Institute (ENCI)                                                                 | Zekri, Abdel Rahman N, Amer,K.E., Ahmed,O.S., Soliman,H.K., Hafez,M.M., Bahnassy,A.A., Abdelhamid,W., Gad,A., Ali,M., Hassan,W., Samir,M., Raouf,A., Hamdy,M.S., Soliman,M.S., Elsisy,M.H., Elkhateeb,S.M., Ezzelarab,M.H., Abouelhoda, Mohamed                                                      |
| EPI_ISL_479728                                                                                                                                                                                                                                                                                                                                                                                                                                                                                                                                                                                                                                                                                                                 | Egyptian National Cancer Institute (ENCI)                                    | Egyptian National Cancer Institute (ENCI)                                                                 | Zekri,A.N., Amer,K.E., Ahmed,O.S., Soliman,H.K., Bahnassy,A.A., Ali,M., Abdelhamid,W., Gad,A., Hassan,W., Samir,M., Raouf,A., Hamdy,M.S., Soliman,M.S., Elsisy,M.H., Elkhateeb,S.M., Ezzelarab,M.H., Abouelhoda,M.                                                                                   |
| EPI_ISL_479729, EPI_ISL_479730, EPI_ISL_479731, EPI_ISL_479732, EPI_ISL_479733, EPI_ISL_479734, EPI_ISL_479735                                                                                                                                                                                                                                                                                                                                                                                                                                                                                                                                                                                                                 | Egyptian National Cancer Institute (ENCI)                                    | Egyptian National Cancer Institute (ENCI)                                                                 | Zekri, Abdel Rahman N, Amer,K.E., Ahmed,O.S., Soliman,H.K., Hafez,M.M., Bahnassy,A.A., Abdelhamid,W., Gad,A., Ali,M., Hassan,W., Samir,M., Raouf,A., Hamdy,M.S., Soliman,M.S., Elsisy,M.H., Elkhateeb,S.M., Ezzelarab,M.H., Abouelhoda, Mohamed                                                      |
| EPI_ISL_480554, EPI_ISL_480556, EPI_ISL_480782, EPI_ISL_480783, EPI_ISL_480786, EPI_ISL_480787, EPI_ISL_480788, EPI_ISL_480789, EPI_ISL_481220, EPI_ISL_481234, EPI_ISL_481235, EPI_ISL_481236, EPI_ISL_481237, EPI_ISL_481238, EPI_ISL_481239, EPI_ISL_481240, EPI_ISL_481243                                                                                                                                                                                                                                                                                                                                                                                                                                                 |                                                                              |                                                                                                           |                                                                                                                                                                                                                                                                                                      |
| see above                                                                                                                                                                                                                                                                                                                                                                                                                                                                                                                                                                                                                                                                                                                      | Institut Pasteur Dakar                                                       | Institut Pasteur de Dakar                                                                                 | Ndongo Dia, Moussa Moise Diagne, Mamadou Diop, Marie Henriette Dior Ndione, Mamadou Malado Jallow, Safietou Sanke, Ousmane Faye, Amadou Alpha Sall.                                                                                                                                                  |
| EPI_ISL_482702, EPI_ISL_482703, EPI_ISL_482704, EPI_ISL_482705, EPI_ISL_482706, EPI_ISL_482707, EPI_ISL_482708, EPI_ISL_482709                                                                                                                                                                                                                                                                                                                                                                                                                                                                                                                                                                                                 | Molecular Diagnostics Services (MDS)                                         | KRISP, KZN Research Innovation and Sequencing Platform                                                    | Giandhari J, Pillay S, Lessells R, Chimukangara B, Mdlalose K, York D, Khan S, Tegally H, Wilkinson E, de Oliveira T                                                                                                                                                                                 |
| EPI_ISL_482710, EPI_ISL_482711, EPI_ISL_482712, EPI_ISL_482713                                                                                                                                                                                                                                                                                                                                                                                                                                                                                                                                                                                                                                                                 | NHLS-IALCH                                                                   | KRISP, KZN Research Innovation and Sequencing Platform                                                    | Giandhari J, Pillay S, Lessells R, Chimukangara B, Mdlalose K, York D, Khan S, Tegally H, Wilkinson E, de Oliveira T                                                                                                                                                                                 |
| EPI_ISL_482714, EPI_ISL_482715, EPI_ISL_482716, EPI_ISL_482717, EPI_ISL_482718, EPI_ISL_482719, EPI_ISL_482720, EPI_ISL_482721, EPI_ISL_482722, EPI_ISL_482723                                                                                                                                                                                                                                                                                                                                                                                                                                                                                                                                                                 | Molecular Diagnostics Services (MDS)                                         | KRISP, KZN Research Innovation and Sequencing Platform                                                    | Giandhari J, Pillay S, Lessells R, Chimukangara B, Mdlalose K, York D, Khan S, Tegally H, Wilkinson E, de Oliveira T                                                                                                                                                                                 |
| EPI_ISL_482724, EPI_ISL_482725, EPI_ISL_482726, EPI_ISL_482727, EPI_ISL_482728, EPI_ISL_482729, EPI_ISL_482730, EPI_ISL_482731                                                                                                                                                                                                                                                                                                                                                                                                                                                                                                                                                                                                 | NHLS-IALCH                                                                   | KRISP, KZN Research Innovation and Sequencing Platform                                                    | Giandhari J, Pillay S, Lessells R, Chimukangara B, Mdlalose K, York D, Khan S, Tegally H, Wilkinson E, de Oliveira T                                                                                                                                                                                 |
| EPI_ISL_482732, EPI_ISL_482733, EPI_ISL_482734, EPI_ISL_482735, EPI_ISL_482736, EPI_ISL_482737, EPI_ISL_482738, EPI_ISL_482739, EPI_ISL_482740                                                                                                                                                                                                                                                                                                                                                                                                                                                                                                                                                                                 | LNR National Reference Laboratory, Mohammed VI University of Health Sciences | Medical Biotechnology Laboratory, Rabat Medical and Pharmacy School, Mohammed The Vth University in Rabat | Meriem LAAMARTI, Souad KARTTI, Rokia LAAMARTI , M.W. CHEMAO-ELFIHRI, Loubna ALLAM, Mouna OUADGHIRI, Imane SMY EJ, Jalila RAHOUI, Houda BENRAHMA, Jalil El ATAR, Idrissa DIAWARA, Rachid EL JAOUDI, Laila SBABOU, Chakib NEJJARI, Saaid AMZAZI, Rachid MENTAG, Lahcen BELYAMANI and Azeddine IBRAHIMI |
| EPI_ISL_482759, EPI_ISL_482760, EPI_ISL_482761, EPI_ISL_482762, EPI_ISL_482763, EPI_ISL_482764, EPI_ISL_482765, EPI_ISL_482766, EPI_ISL_482767, EPI_ISL_482768, EPI_ISL_482769, EPI_ISL_482770, EPI_ISL_482771, EPI_ISL_482772, EPI_ISL_482773, EPI_ISL_482774, EPI_ISL_482775                                                                                                                                                                                                                                                                                                                                                                                                                                                 |                                                                              |                                                                                                           |                                                                                                                                                                                                                                                                                                      |
| see above                                                                                                                                                                                                                                                                                                                                                                                                                                                                                                                                                                                                                                                                                                                      | Medical Ain Shams Research Institute (MASRI), Ain Shams University           | Medical Ain Shams Research Institute (MASRI), Ain Shams University                                        | Hesham Elghazaly, Sara Hassan Agwa, Ahmad Moustafa, Hala Hafez, Sara Einakeep, Shaimaa Moustafa, Aya Mohamed, Reham Mamdouh, Ghada Ismael, Ashraf Omar, Osama Mansour, Mahmoud Elmeitini                                                                                                             |
| EPI_ISL_482848, EPI_ISL_482849, EPI_ISL_482850                                                                                                                                                                                                                                                                                                                                                                                                                                                                                                                                                                                                                                                                                 | NHLS-IALCH                                                                   | KRISP, KZN Research Innovation and Sequencing Platform                                                    | Giandhari J, Pillay S, Lessells R, Chimukangara B, Mdlalose K, York D, Khan S, Tegally H, Wilkinson E, de Oliveira T                                                                                                                                                                                 |
| EPI_ISL_482851, EPI_ISL_482852, EPI_ISL_482853, EPI_ISL_482854, EPI_ISL_482855, EPI_ISL_482856, EPI_ISL_482857, EPI_ISL_482858, EPI_ISL_482859, EPI_ISL_482860, EPI_ISL_482861, EPI_ISL_482862, EPI_ISL_482863, EPI_ISL_482864, EPI_ISL_482865, EPI_ISL_482866, EPI_ISL_482867, EPI_ISL_482868, EPI_ISL_482869, EPI_ISL_482870, EPI_ISL_482871, EPI_ISL_482872                                                                                                                                                                                                                                                                                                                                                                 |                                                                              |                                                                                                           |                                                                                                                                                                                                                                                                                                      |
| see above                                                                                                                                                                                                                                                                                                                                                                                                                                                                                                                                                                                                                                                                                                                      | Molecular Diagnostics Services (MDS)                                         | KRISP, KZN Research Innovation and Sequencing Platform                                                    | Giandhari J, Pillay S, Lessells R, Chimukangara B, Mdlalose K, York D, Khan S, Tegally H, Wilkinson E, de Oliveira T                                                                                                                                                                                 |
| EPI_ISL_482874, EPI_ISL_482875, EPI_ISL_482876, EPI_ISL_482877, EPI_ISL_482878                                                                                                                                                                                                                                                                                                                                                                                                                                                                                                                                                                                                                                                 | Institut Pasteur Dakar                                                       | Institut Pasteur de Dakar                                                                                 | Ndongo Dia, Moussa Moise Diagne, Mamadou Diop, Marie Henriette Dior Ndione, Mamadou malado Jallow, Safietou Sankhe, Ousmane Faye, Amadou Alpha Sall.                                                                                                                                                 |
| EPI_ISL_483035, EPI_ISL_483036, EPI_ISL_483037, EPI_ISL_483038                                                                                                                                                                                                                                                                                                                                                                                                                                                                                                                                                                                                                                                                 | Medical Ain Shams Research Institute (MASRI), Ain Shams University           | Medical Ain Shams Research Institute (MASRI), Ain Shams University                                        | Hesham Elghazaly, Sara Hassan Agwa, Ahmad Moustafa, Hala Hafez, Sara Einakeep, Shaimaa Moustafa, Aya Mohamed, Reham Mamdouh, Ghada Ismael, Ashraf Omar, Osama Mansour, Mahmoud Elmeitini                                                                                                             |
| EPI_ISL_485635, EPI_ISL_485708, EPI_ISL_485710, EPI_ISL_485711                                                                                                                                                                                                                                                                                                                                                                                                                                                                                                                                                                                                                                                                 | Institut Pasteur Dakar                                                       | Institut Pasteur de Dakar                                                                                 | Ndongo Dia, Moussa Moise Diagne, Mamadou diop, Marie Henriette Dior Ndione, Mamadou Malado Jallow, Safietou Sanke, Ousmane Faye, Amadou Alpha Sall.                                                                                                                                                  |
| EPI_ISL_485712                                                                                                                                                                                                                                                                                                                                                                                                                                                                                                                                                                                                                                                                                                                 | Institut Pasteur                                                             | Institut Pasteur de Dakar                                                                                 | Ndongo Dia, Moussa Moise Diagne, Mamadou diop, Marie Henriette Dior Ndione, Mamadou Malado Jallow, Safietou Sanke, Ousmane Faye, Amadou Alpha Sall.                                                                                                                                                  |
| EPI_ISL_485713, EPI_ISL_485715, EPI_ISL_485716, EPI_ISL_485717                                                                                                                                                                                                                                                                                                                                                                                                                                                                                                                                                                                                                                                                 | Institut Pasteur Dakar                                                       | Institut Pasteur de Dakar                                                                                 | Ndongo Dia, Moussa Moise Diagne, Mamadou diop, Marie Henriette Dior Ndione, Mamadou Malado Jallow, Safietou Sanke, Ousmane Faye, Amadou Alpha Sall.                                                                                                                                                  |
| EPI_ISL_486857, EPI_ISL_486858, EPI_ISL_486859, EPI_ISL_486860, EPI_ISL_486861, EPI_ISL_486862, EPI_ISL_486863, EPI_ISL_486864, EPI_ISL_486865, EPI_ISL_486866, EPI_ISL_486867, EPI_ISL_486868, EPI_ISL_486869, EPI_ISL_486870, EPI_ISL_486871, EPI_ISL_486872, EPI_ISL_486873                                                                                                                                                                                                                                                                                                                                                                                                                                                 |                                                                              |                                                                                                           |                                                                                                                                                                                                                                                                                                      |
| see above                                                                                                                                                                                                                                                                                                                                                                                                                                                                                                                                                                                                                                                                                                                      | Institut Pasteur Dakar                                                       | Institut Pasteur de Dakar                                                                                 | Ndongo Dia, Moussa Moise Diagne, Mamadou Diop, Marie Henriette Dior Ndione, Mamadou Malado Jallow, Safietou Sanke, Ousmane Faye, Amadou Alpha Sall.                                                                                                                                                  |
| EPI_ISL_487087, EPI_ISL_487089, EPI_ISL_487090, EPI_ISL_487091, EPI_ISL_487092, EPI_ISL_487095, EPI_ISL_487096, EPI_ISL_487098, EPI_ISL_487099, EPI_ISL_487101, EPI_ISL_487102, EPI_ISL_487103, EPI_ISL_487104, EPI_ISL_487105, EPI_ISL_487106, EPI_ISL_487107, EPI_ISL_487108, EPI_ISL_487109, EPI_ISL_487110, EPI_ISL_487111, EPI_ISL_487112                                                                                                                                                                                                                                                                                                                                                                                 |                                                                              |                                                                                                           |                                                                                                                                                                                                                                                                                                      |





|                                                                                                                                                                                                                                                                                                                                                                                                                                                                                                                                                                                                                                                                                                                                                                                                                                                                                                                                                                                                                                                                                                                                                                                                                                                                                                                                                                                                                                                                                                                                                                                                                                                                                                                                                                                                                                                                                                                                                                                                                                                                                                                                                                                                                                                                                                                                                                                                                                                                                                                                                                                                                                                                                                                                                                                                                                                                                                                                                                                                                                                                                                                                                                                                                                                                                                                                                                                                                                                                                                                                                                                                                                                                                                                                                                                                                                                                |                                                                                                                |                                                                                        |                                                                                                                                  |                                                                                                                                                                                                                                                                                                                                                                 |
|----------------------------------------------------------------------------------------------------------------------------------------------------------------------------------------------------------------------------------------------------------------------------------------------------------------------------------------------------------------------------------------------------------------------------------------------------------------------------------------------------------------------------------------------------------------------------------------------------------------------------------------------------------------------------------------------------------------------------------------------------------------------------------------------------------------------------------------------------------------------------------------------------------------------------------------------------------------------------------------------------------------------------------------------------------------------------------------------------------------------------------------------------------------------------------------------------------------------------------------------------------------------------------------------------------------------------------------------------------------------------------------------------------------------------------------------------------------------------------------------------------------------------------------------------------------------------------------------------------------------------------------------------------------------------------------------------------------------------------------------------------------------------------------------------------------------------------------------------------------------------------------------------------------------------------------------------------------------------------------------------------------------------------------------------------------------------------------------------------------------------------------------------------------------------------------------------------------------------------------------------------------------------------------------------------------------------------------------------------------------------------------------------------------------------------------------------------------------------------------------------------------------------------------------------------------------------------------------------------------------------------------------------------------------------------------------------------------------------------------------------------------------------------------------------------------------------------------------------------------------------------------------------------------------------------------------------------------------------------------------------------------------------------------------------------------------------------------------------------------------------------------------------------------------------------------------------------------------------------------------------------------------------------------------------------------------------------------------------------------------------------------------------------------------------------------------------------------------------------------------------------------------------------------------------------------------------------------------------------------------------------------------------------------------------------------------------------------------------------------------------------------------------------------------------------------------------------------------------------------|----------------------------------------------------------------------------------------------------------------|----------------------------------------------------------------------------------------|----------------------------------------------------------------------------------------------------------------------------------|-----------------------------------------------------------------------------------------------------------------------------------------------------------------------------------------------------------------------------------------------------------------------------------------------------------------------------------------------------------------|
| EPI_ISL_510532                                                                                                                                                                                                                                                                                                                                                                                                                                                                                                                                                                                                                                                                                                                                                                                                                                                                                                                                                                                                                                                                                                                                                                                                                                                                                                                                                                                                                                                                                                                                                                                                                                                                                                                                                                                                                                                                                                                                                                                                                                                                                                                                                                                                                                                                                                                                                                                                                                                                                                                                                                                                                                                                                                                                                                                                                                                                                                                                                                                                                                                                                                                                                                                                                                                                                                                                                                                                                                                                                                                                                                                                                                                                                                                                                                                                                                                 | Biological prevention, army                                                                                    | Biological prevention, army                                                            | Morales,A.N., Kayeyi,N., Malama,K., Tembo,J., Bates,M., Sawa,H., Takada,A., Nalubamba,K.S., Mukonka,V., Chilufya,C. and Zumla,A. |                                                                                                                                                                                                                                                                                                                                                                 |
| EPI_ISL_512811, EPI_ISL_512812, EPI_ISL_512813, EPI_ISL_512814, EPI_ISL_512815, EPI_ISL_512816, EPI_ISL_512817, EPI_ISL_512818, EPI_ISL_512819, EPI_ISL_512820, EPI_ISL_512821                                                                                                                                                                                                                                                                                                                                                                                                                                                                                                                                                                                                                                                                                                                                                                                                                                                                                                                                                                                                                                                                                                                                                                                                                                                                                                                                                                                                                                                                                                                                                                                                                                                                                                                                                                                                                                                                                                                                                                                                                                                                                                                                                                                                                                                                                                                                                                                                                                                                                                                                                                                                                                                                                                                                                                                                                                                                                                                                                                                                                                                                                                                                                                                                                                                                                                                                                                                                                                                                                                                                                                                                                                                                                 | see above                                                                                                      | Kenema Government Hospital, Ministry of Health and Sanitation                          | Kenema Government Hospital, Ministry of Health and Sanitation                                                                    |                                                                                                                                                                                                                                                                                                                                                                 |
| EPI_ISL_512873                                                                                                                                                                                                                                                                                                                                                                                                                                                                                                                                                                                                                                                                                                                                                                                                                                                                                                                                                                                                                                                                                                                                                                                                                                                                                                                                                                                                                                                                                                                                                                                                                                                                                                                                                                                                                                                                                                                                                                                                                                                                                                                                                                                                                                                                                                                                                                                                                                                                                                                                                                                                                                                                                                                                                                                                                                                                                                                                                                                                                                                                                                                                                                                                                                                                                                                                                                                                                                                                                                                                                                                                                                                                                                                                                                                                                                                 | Centre Pasteur of Cameroun                                                                                     | Virology Service, Centre Pasteur of Cameroun                                           | Richard Njoum and Serge Alain SADEUH-Mba                                                                                         |                                                                                                                                                                                                                                                                                                                                                                 |
| EPI_ISL_513589, EPI_ISL_513590, EPI_ISL_513591, EPI_ISL_513592, EPI_ISL_513593, EPI_ISL_513594, EPI_ISL_513595, EPI_ISL_513596, EPI_ISL_513597, EPI_ISL_513598, EPI_ISL_513599, EPI_ISL_513600, EPI_ISL_513601, EPI_ISL_513602, EPI_ISL_513603, EPI_ISL_513604, EPI_ISL_513605, EPI_ISL_513606, EPI_ISL_513607, EPI_ISL_513608, EPI_ISL_513609, EPI_ISL_513610, EPI_ISL_513611, EPI_ISL_513612, EPI_ISL_513613, EPI_ISL_513614, EPI_ISL_513615, EPI_ISL_513616, EPI_ISL_513617, EPI_ISL_513618, EPI_ISL_513619, EPI_ISL_513620, EPI_ISL_513621, EPI_ISL_513622, EPI_ISL_513623, EPI_ISL_513624, EPI_ISL_513625, EPI_ISL_513626, EPI_ISL_513627, EPI_ISL_513628, EPI_ISL_513629, EPI_ISL_513630, EPI_ISL_513631, EPI_ISL_514103, EPI_ISL_514104, EPI_ISL_514105, EPI_ISL_514106, EPI_ISL_514107, EPI_ISL_514108, EPI_ISL_514109, EPI_ISL_514110, EPI_ISL_514111, EPI_ISL_514112, EPI_ISL_514113, EPI_ISL_514114, EPI_ISL_514115, EPI_ISL_514116, EPI_ISL_514117, EPI_ISL_514118, EPI_ISL_514119, EPI_ISL_514120, EPI_ISL_514121, EPI_ISL_514122, EPI_ISL_514123, EPI_ISL_514124, EPI_ISL_514125                                                                                                                                                                                                                                                                                                                                                                                                                                                                                                                                                                                                                                                                                                                                                                                                                                                                                                                                                                                                                                                                                                                                                                                                                                                                                                                                                                                                                                                                                                                                                                                                                                                                                                                                                                                                                                                                                                                                                                                                                                                                                                                                                                                                                                                                                                                                                                                                                                                                                                                                                                                                                                                                                                                                                                 | see above                                                                                                      | Viral Respiratory Lab, National Institute for Biomedical Research (INRB)               | Pathogen Sequencing Lab, National Institute for Biomedical Research (INRB)                                                       | Placide Mbala-Kingebeni, Edith Nkwembe, Eddy Kinganda-Lusamaki, Amuri Aziza, Francisca Muyembe Mawete, Emmanuel Lokilo Lofiko, Catherine Pratt, Matthias Pauthner, Josh Quick, Allison Black, James Hadfield, Trevor Bedford, Ian Goodfellow, Andrew Rambaut, Nick Loman, Kristian Andersen, Michael Wiley, Steve Ahuka-Mundeke, Jean-Jacques Muyembe Tatumfumu |
| EPI_ISL_514355, EPI_ISL_514356, EPI_ISL_514357, EPI_ISL_514358, EPI_ISL_514359, EPI_ISL_514360, EPI_ISL_514361, EPI_ISL_514362, EPI_ISL_514363, EPI_ISL_514364, EPI_ISL_514365, EPI_ISL_514366, EPI_ISL_514367, EPI_ISL_514368, EPI_ISL_514369, EPI_ISL_514370, EPI_ISL_514371, EPI_ISL_514372, EPI_ISL_514373, EPI_ISL_514374, EPI_ISL_514375, EPI_ISL_514376, EPI_ISL_514377, EPI_ISL_514378, EPI_ISL_514379, EPI_ISL_514380, EPI_ISL_514381, EPI_ISL_514382, EPI_ISL_514383, EPI_ISL_514384, EPI_ISL_514385, EPI_ISL_514386, EPI_ISL_514387, EPI_ISL_514388, EPI_ISL_514389, EPI_ISL_514390, EPI_ISL_514391, EPI_ISL_514392, EPI_ISL_514393, EPI_ISL_514394, EPI_ISL_514395, EPI_ISL_514396, EPI_ISL_514397, EPI_ISL_514398, EPI_ISL_514399, EPI_ISL_514400, EPI_ISL_514401, EPI_ISL_514402, EPI_ISL_514403, EPI_ISL_514404, EPI_ISL_514405, EPI_ISL_514406, EPI_ISL_514407, EPI_ISL_514408, EPI_ISL_514409, EPI_ISL_514410, EPI_ISL_514411, EPI_ISL_514412, EPI_ISL_514413, EPI_ISL_514414, EPI_ISL_514415, EPI_ISL_514416, EPI_ISL_514417, EPI_ISL_514418, EPI_ISL_514419, EPI_ISL_514420, EPI_ISL_514421, EPI_ISL_514422, EPI_ISL_514423, EPI_ISL_514424, EPI_ISL_514425                                                                                                                                                                                                                                                                                                                                                                                                                                                                                                                                                                                                                                                                                                                                                                                                                                                                                                                                                                                                                                                                                                                                                                                                                                                                                                                                                                                                                                                                                                                                                                                                                                                                                                                                                                                                                                                                                                                                                                                                                                                                                                                                                                                                                                                                                                                                                                                                                                                                                                                                                                                                                                                                                 | see above                                                                                                      | National Institute for Communicable Diseases of the National Health Laboratory Service | National Institute for Communicable Diseases of the National Health Laboratory Service                                           | Allam M, Ismail A, Khumalo Z, Kwenda S, Mtshali P, Mnyameni F, Mohale T, Bhiman JN                                                                                                                                                                                                                                                                              |
| EPI_ISL_515082, EPI_ISL_515083, EPI_ISL_515084, EPI_ISL_515085, EPI_ISL_515086, EPI_ISL_515087, EPI_ISL_515088, EPI_ISL_515089, EPI_ISL_515090, EPI_ISL_515091, EPI_ISL_515092, EPI_ISL_515093, EPI_ISL_515094, EPI_ISL_515095, EPI_ISL_515096, EPI_ISL_515097, EPI_ISL_515098, EPI_ISL_515099, EPI_ISL_515100, EPI_ISL_515101, EPI_ISL_515102, EPI_ISL_515103, EPI_ISL_515104, EPI_ISL_515105, EPI_ISL_515106, EPI_ISL_515107, EPI_ISL_515108, EPI_ISL_515109, EPI_ISL_515110, EPI_ISL_515111, EPI_ISL_515112                                                                                                                                                                                                                                                                                                                                                                                                                                                                                                                                                                                                                                                                                                                                                                                                                                                                                                                                                                                                                                                                                                                                                                                                                                                                                                                                                                                                                                                                                                                                                                                                                                                                                                                                                                                                                                                                                                                                                                                                                                                                                                                                                                                                                                                                                                                                                                                                                                                                                                                                                                                                                                                                                                                                                                                                                                                                                                                                                                                                                                                                                                                                                                                                                                                                                                                                                 | see above                                                                                                      | Department of Biochemistry, Cell and Molecular Biology                                 | WACCIBP, University of Ghana                                                                                                     | Ngoi,J.M., Quashie,P., Morang'a,C.M., Amuzu,D.S., Adu,B., Kumordjie,S., Eshun,M., Boatemaa,L., Magnussen,V., Kotey,E., Tei-Maya,F., Arjarquah,A., Mutungi,J.K., Bediako,Y., Asante,I., Bonney,E., Kyei,G.B., Bonney,K., Amenga-Etego,L.N., Anang,A.K., Awandare,G.A., Ampofo,W.                                                                                 |
| EPI_ISL_515133, EPI_ISL_515134, EPI_ISL_515135, EPI_ISL_515136, EPI_ISL_515137, EPI_ISL_515138, EPI_ISL_515139, EPI_ISL_515140, EPI_ISL_515141, EPI_ISL_515142, EPI_ISL_515143, EPI_ISL_515144, EPI_ISL_515145, EPI_ISL_515146, EPI_ISL_515147, EPI_ISL_515148, EPI_ISL_515149, EPI_ISL_515150, EPI_ISL_515151, EPI_ISL_515152, EPI_ISL_515153, EPI_ISL_515154, EPI_ISL_515155, EPI_ISL_515156, EPI_ISL_515157, EPI_ISL_515158, EPI_ISL_515159, EPI_ISL_515160, EPI_ISL_515161, EPI_ISL_515162, EPI_ISL_515163, EPI_ISL_515164, EPI_ISL_515165, EPI_ISL_515166, EPI_ISL_515167, EPI_ISL_515168, EPI_ISL_515169, EPI_ISL_515170, EPI_ISL_515171, EPI_ISL_515172, EPI_ISL_515173, EPI_ISL_515174, EPI_ISL_515175, EPI_ISL_515176, EPI_ISL_515177, EPI_ISL_515178, EPI_ISL_515179, EPI_ISL_515180                                                                                                                                                                                                                                                                                                                                                                                                                                                                                                                                                                                                                                                                                                                                                                                                                                                                                                                                                                                                                                                                                                                                                                                                                                                                                                                                                                                                                                                                                                                                                                                                                                                                                                                                                                                                                                                                                                                                                                                                                                                                                                                                                                                                                                                                                                                                                                                                                                                                                                                                                                                                                                                                                                                                                                                                                                                                                                                                                                                                                                                                 | see above                                                                                                      | National Institute for Communicable Diseases of the National Health Laboratory Service | National Institute for Communicable Diseases of the National Health Laboratory Service                                           | Allam M, Ismail A, Khumalo Z, Kwenda S, Mtshali P, Mnyameni F, Mohale T, Bhiman JN                                                                                                                                                                                                                                                                              |
| EPI_ISL_515181, EPI_ISL_515182, EPI_ISL_515183, EPI_ISL_515184, EPI_ISL_515247, EPI_ISL_515248, EPI_ISL_515249                                                                                                                                                                                                                                                                                                                                                                                                                                                                                                                                                                                                                                                                                                                                                                                                                                                                                                                                                                                                                                                                                                                                                                                                                                                                                                                                                                                                                                                                                                                                                                                                                                                                                                                                                                                                                                                                                                                                                                                                                                                                                                                                                                                                                                                                                                                                                                                                                                                                                                                                                                                                                                                                                                                                                                                                                                                                                                                                                                                                                                                                                                                                                                                                                                                                                                                                                                                                                                                                                                                                                                                                                                                                                                                                                 | EPI_ISL_515181, EPI_ISL_515182, EPI_ISL_515183, EPI_ISL_515184, EPI_ISL_515247, EPI_ISL_515248, EPI_ISL_515249 | Kumasi Centre for Collaborative Research in Tropical Medicine, Kumasi.                 | Institute of Virology, Charité - Universitätsmedizin Berlin                                                                      | Augustina Sylverken, Philip El-Duah, Michael Owusu, Julia Schneider, Richmond Yeboah, Richmond Gorman, Eric Adu, Sherihane Areyetey, Jesse Addo Asamoah,Jörn Beheim-Schwarzbach, Victor Max Corman, Christian Drosten, Richard Phillips.                                                                                                                        |
| EPI_ISL_515568, EPI_ISL_515569, EPI_ISL_515570, EPI_ISL_515571, EPI_ISL_515572, EPI_ISL_515573, EPI_ISL_515574, EPI_ISL_515575, EPI_ISL_515576, EPI_ISL_515577, EPI_ISL_515578, EPI_ISL_515579, EPI_ISL_515580, EPI_ISL_515581, EPI_ISL_515582, EPI_ISL_515583, EPI_ISL_515584, EPI_ISL_515585, EPI_ISL_515586, EPI_ISL_515587, EPI_ISL_515588, EPI_ISL_515589, EPI_ISL_515590, EPI_ISL_515591, EPI_ISL_515592, EPI_ISL_515593, EPI_ISL_515594, EPI_ISL_515595, EPI_ISL_515596, EPI_ISL_515597, EPI_ISL_515598, EPI_ISL_515599, EPI_ISL_515600, EPI_ISL_515601, EPI_ISL_515602, EPI_ISL_515603, EPI_ISL_515604, EPI_ISL_515605, EPI_ISL_515606, EPI_ISL_515607, EPI_ISL_515608, EPI_ISL_515609, EPI_ISL_515610, EPI_ISL_515611, EPI_ISL_515612, EPI_ISL_515613, EPI_ISL_515614, EPI_ISL_515615, EPI_ISL_515616, EPI_ISL_515617, EPI_ISL_515618, EPI_ISL_515619, EPI_ISL_515620, EPI_ISL_515621, EPI_ISL_515622, EPI_ISL_515623, EPI_ISL_515624, EPI_ISL_515625, EPI_ISL_515626, EPI_ISL_515627, EPI_ISL_515628, EPI_ISL_515629, EPI_ISL_515630, EPI_ISL_515631, EPI_ISL_515632, EPI_ISL_515633, EPI_ISL_515634, EPI_ISL_515635, EPI_ISL_515636, EPI_ISL_515637, EPI_ISL_515638, EPI_ISL_515639, EPI_ISL_515640, EPI_ISL_515641, EPI_ISL_515642, EPI_ISL_515643, EPI_ISL_515644, EPI_ISL_515645, EPI_ISL_515646, EPI_ISL_515647, EPI_ISL_515648, EPI_ISL_515649, EPI_ISL_515650, EPI_ISL_515651, EPI_ISL_515652, EPI_ISL_515653, EPI_ISL_515654, EPI_ISL_515655, EPI_ISL_515656, EPI_ISL_515657, EPI_ISL_515658, EPI_ISL_515659, EPI_ISL_515660, EPI_ISL_515661, EPI_ISL_515662, EPI_ISL_515663, EPI_ISL_515664, EPI_ISL_515665, EPI_ISL_515666, EPI_ISL_515667, EPI_ISL_515668, EPI_ISL_515669, EPI_ISL_515670, EPI_ISL_515671, EPI_ISL_515672, EPI_ISL_515673, EPI_ISL_515674, EPI_ISL_515675, EPI_ISL_515676, EPI_ISL_515677, EPI_ISL_515678, EPI_ISL_515679, EPI_ISL_515680, EPI_ISL_515681, EPI_ISL_515682, EPI_ISL_515683, EPI_ISL_515684, EPI_ISL_515685, EPI_ISL_515686, EPI_ISL_515687, EPI_ISL_515688, EPI_ISL_515689, EPI_ISL_515690, EPI_ISL_515691, EPI_ISL_515692, EPI_ISL_515693, EPI_ISL_515694, EPI_ISL_515695, EPI_ISL_515696, EPI_ISL_515697, EPI_ISL_515698, EPI_ISL_515699, EPI_ISL_515700, EPI_ISL_515701, EPI_ISL_515702, EPI_ISL_515703, EPI_ISL_515704, EPI_ISL_515705, EPI_ISL_515706, EPI_ISL_515707, EPI_ISL_515708, EPI_ISL_515709, EPI_ISL_515710, EPI_ISL_515711, EPI_ISL_515712, EPI_ISL_515713, EPI_ISL_515714, EPI_ISL_515715, EPI_ISL_515716, EPI_ISL_515717, EPI_ISL_515718, EPI_ISL_515719, EPI_ISL_515720, EPI_ISL_515721, EPI_ISL_515722, EPI_ISL_515723, EPI_ISL_515724, EPI_ISL_515725, EPI_ISL_515726, EPI_ISL_515727, EPI_ISL_515728, EPI_ISL_515729, EPI_ISL_515730, EPI_ISL_515731, EPI_ISL_515732, EPI_ISL_515733, EPI_ISL_515734, EPI_ISL_515735, EPI_ISL_515736, EPI_ISL_515737, EPI_ISL_515738, EPI_ISL_515739, EPI_ISL_515740, EPI_ISL_515741, EPI_ISL_515742, EPI_ISL_515743, EPI_ISL_515744, EPI_ISL_515745, EPI_ISL_515746, EPI_ISL_515747, EPI_ISL_515748, EPI_ISL_515749, EPI_ISL_515750, EPI_ISL_515751, EPI_ISL_515752, EPI_ISL_515753, EPI_ISL_515754, EPI_ISL_515755, EPI_ISL_515756, EPI_ISL_515757, EPI_ISL_515758, EPI_ISL_515759, EPI_ISL_515760, EPI_ISL_515761, EPI_ISL_515762, EPI_ISL_515763, EPI_ISL_515764, EPI_ISL_515765, EPI_ISL_515766, EPI_ISL_515767, EPI_ISL_515768, EPI_ISL_515769, EPI_ISL_515770, EPI_ISL_515771, EPI_ISL_515772, EPI_ISL_515773, EPI_ISL_515774, EPI_ISL_515775, EPI_ISL_515776, EPI_ISL_515777, EPI_ISL_515778, EPI_ISL_515779, EPI_ISL_515780, EPI_ISL_515781, EPI_ISL_515782, EPI_ISL_515783, EPI_ISL_515784, EPI_ISL_515785, EPI_ISL_515786, EPI_ISL_515787, EPI_ISL_515788, EPI_ISL_515789, EPI_ISL_515790, EPI_ISL_515791, EPI_ISL_515792, EPI_ISL_515793, EPI_ISL_515794, EPI_ISL_515795, EPI_ISL_515796, EPI_ISL_515797, EPI_ISL_515798, EPI_ISL_515799 | see above                                                                                                      | NHLS-IALCH                                                                             | KRISP, KZN Research Innovation and Sequencing Platform                                                                           | Giandhari J, Pillay S, Lessells R, Mdlalose K, York D, Khan S, Tegally H, Wilkinson E, de Oliveira T                                                                                                                                                                                                                                                            |
| EPI_ISL_515800, EPI_ISL_515801, EPI_ISL_515802, EPI_ISL_515803, EPI_ISL_515804, EPI_ISL_515805, EPI_ISL_515806, EPI_ISL_515807, EPI_ISL_515808, EPI_ISL_515809, EPI_ISL_515810, EPI_ISL_515811, EPI_ISL_515812, EPI_ISL_515813, EPI_ISL_515814, EPI_ISL_515815, EPI_ISL_515816, EPI_ISL_515817, EPI_ISL_515818, EPI_ISL_515819, EPI_ISL_515820, EPI_ISL_515821, EPI_ISL_515822, EPI_ISL_515823, EPI_ISL_515824, EPI_ISL_515825, EPI_ISL_515826, EPI_ISL_515827, EPI_ISL_515828, EPI_ISL_515829, EPI_ISL_515830, EPI_ISL_515831, EPI_ISL_515832, EPI_ISL_515833, EPI_ISL_515834, EPI_ISL_515835, EPI_ISL_515836, EPI_ISL_515837, EPI_ISL_515838, EPI_ISL_515839, EPI_ISL_515840, EPI_ISL_515841, EPI_ISL_515842, EPI_ISL_515843, EPI_ISL_515844, EPI_ISL_515845, EPI_ISL_515846, EPI_ISL_515847, EPI_ISL_515848, EPI_ISL_515849, EPI_ISL_515850, EPI_ISL_515851, EPI_ISL_515852, EPI_ISL_515853, EPI_ISL_515854, EPI_ISL_515855, EPI_ISL_515856, EPI_ISL_515857, EPI_ISL_515858, EPI_ISL_515859, EPI_ISL_515860, EPI_ISL_515861, EPI_ISL_515862, EPI_ISL_515863, EPI_ISL_515864, EPI_ISL_515865, EPI_ISL_515866, EPI_ISL_515867, EPI_ISL_515868, EPI_ISL_515869, EPI_ISL_515870, EPI_ISL_515871, EPI_ISL_515872, EPI_ISL_515873, EPI_ISL_515874, EPI_ISL_515875, EPI_ISL_515876, EPI_ISL_515877, EPI_ISL_515878, EPI_ISL_515879, EPI_ISL_515880, EPI_ISL_515881, EPI_ISL_515882, EPI_ISL_515883, EPI_ISL_515884, EPI_ISL_515885, EPI_ISL_515886, EPI_ISL_515887, EPI_ISL_515888, EPI_ISL_515889, EPI_ISL_515890, EPI_ISL_515891, EPI_ISL_515892, EPI_ISL_515893                                                                                                                                                                                                                                                                                                                                                                                                                                                                                                                                                                                                                                                                                                                                                                                                                                                                                                                                                                                                                                                                                                                                                                                                                                                                                                                                                                                                                                                                                                                                                                                                                                                                                                                                                                                                                                                                                                                                                                                                                                                                                                                                                                                                                                                                                                 | see above                                                                                                      | Medical Disagnostics Services (MDS)                                                    | KRISP, KZN Research Innovation and Sequencing Platform                                                                           | Giandhari J, Pillay S, Lessells R, ChimukangaraB, Mdlalose K, York D, Khan S, Tegally H, Wilkinson E, de Oliveira T                                                                                                                                                                                                                                             |
| EPI_ISL_518033, EPI_ISL_518034, EPI_ISL_518035, EPI_ISL_518036, EPI_ISL_518037, EPI_ISL_518038, EPI_ISL_518039, EPI_ISL_518040, EPI_ISL_518041, EPI_ISL_518042, EPI_ISL_518043, EPI_ISL_518044, EPI_ISL_518045, EPI_ISL_518046, EPI_ISL_518047, EPI_ISL_518048, EPI_ISL_518049, EPI_ISL_518050, EPI_ISL_518051, EPI_ISL_518052, EPI_ISL_518053                                                                                                                                                                                                                                                                                                                                                                                                                                                                                                                                                                                                                                                                                                                                                                                                                                                                                                                                                                                                                                                                                                                                                                                                                                                                                                                                                                                                                                                                                                                                                                                                                                                                                                                                                                                                                                                                                                                                                                                                                                                                                                                                                                                                                                                                                                                                                                                                                                                                                                                                                                                                                                                                                                                                                                                                                                                                                                                                                                                                                                                                                                                                                                                                                                                                                                                                                                                                                                                                                                                 | see above                                                                                                      | NHLS-IALCH                                                                             | KRISP, KZN Research Innovation and Sequencing Platform                                                                           | Giandhari J, Pillay S, Lessells R, Mdlalose K, York D, Khan S, Tegally H, Wilkinson E, de Oliveira T                                                                                                                                                                                                                                                            |
| EPI_ISL_522547, EPI_ISL_522548                                                                                                                                                                                                                                                                                                                                                                                                                                                                                                                                                                                                                                                                                                                                                                                                                                                                                                                                                                                                                                                                                                                                                                                                                                                                                                                                                                                                                                                                                                                                                                                                                                                                                                                                                                                                                                                                                                                                                                                                                                                                                                                                                                                                                                                                                                                                                                                                                                                                                                                                                                                                                                                                                                                                                                                                                                                                                                                                                                                                                                                                                                                                                                                                                                                                                                                                                                                                                                                                                                                                                                                                                                                                                                                                                                                                                                 | EPI_ISL_522547, EPI_ISL_522548                                                                                 | Plateforme CYROI                                                                       | UMR PIMIT Université de La Réunion                                                                                               | David Wilkinson, Camille Lebarbenchon, Patrick Mavingui                                                                                                                                                                                                                                                                                                         |
| EPI_ISL_522549, EPI_ISL_522550                                                                                                                                                                                                                                                                                                                                                                                                                                                                                                                                                                                                                                                                                                                                                                                                                                                                                                                                                                                                                                                                                                                                                                                                                                                                                                                                                                                                                                                                                                                                                                                                                                                                                                                                                                                                                                                                                                                                                                                                                                                                                                                                                                                                                                                                                                                                                                                                                                                                                                                                                                                                                                                                                                                                                                                                                                                                                                                                                                                                                                                                                                                                                                                                                                                                                                                                                                                                                                                                                                                                                                                                                                                                                                                                                                                                                                 | EPI_ISL_522549, EPI_ISL_522550                                                                                 | Félix Guyon Hospital                                                                   | UMR PIMIT Université de La Réunion                                                                                               | David Wilkinson, Camille Lebarbenchon, Patrick Mavingui                                                                                                                                                                                                                                                                                                         |
| EPI_ISL_524426                                                                                                                                                                                                                                                                                                                                                                                                                                                                                                                                                                                                                                                                                                                                                                                                                                                                                                                                                                                                                                                                                                                                                                                                                                                                                                                                                                                                                                                                                                                                                                                                                                                                                                                                                                                                                                                                                                                                                                                                                                                                                                                                                                                                                                                                                                                                                                                                                                                                                                                                                                                                                                                                                                                                                                                                                                                                                                                                                                                                                                                                                                                                                                                                                                                                                                                                                                                                                                                                                                                                                                                                                                                                                                                                                                                                                                                 | EPI_ISL_524426                                                                                                 | Egyptian National Cancer Institute (ENCI)                                              | Egyptian National Cancer Institute (ENCI)                                                                                        | Zekri, Abdel Rahman N., Amer,K.E., Ahmed,O.S., Soliman,H.K., Ali,M.A., Hassan,W.A., Mahmood,A.A., Khattab,A.A., Hafez,M.M., Abouelhoda, Mohamed                                                                                                                                                                                                                 |
| EPI_ISL_524427                                                                                                                                                                                                                                                                                                                                                                                                                                                                                                                                                                                                                                                                                                                                                                                                                                                                                                                                                                                                                                                                                                                                                                                                                                                                                                                                                                                                                                                                                                                                                                                                                                                                                                                                                                                                                                                                                                                                                                                                                                                                                                                                                                                                                                                                                                                                                                                                                                                                                                                                                                                                                                                                                                                                                                                                                                                                                                                                                                                                                                                                                                                                                                                                                                                                                                                                                                                                                                                                                                                                                                                                                                                                                                                                                                                                                                                 | EPI_ISL_524427                                                                                                 | Egyptian National Cancer Institute (ENCI)                                              | Egyptian National Cancer Institute (ENCI)                                                                                        | Zekri, Abdel Rahman N, Amer,K.E., Ahmed,O.S., Soliman,H.K., Hafez,M.M., Bahnassy,A.A., Abdelhamid,W., Gad,A., Ali,M., Hassan,W., Samir,M., Raouf,A., Hamdy,M.S., Soliman,M.S., Elsisy,M.H., Elkhatieb,S.M., Ezzelarab,M.H., Abouelhoda, Mohamed                                                                                                                 |
| EPI_ISL_526975, EPI_ISL_526976, EPI_ISL_526977, EPI_ISL_526978, EPI_ISL_526979, EPI_ISL_526980, EPI_ISL_526981, EPI_ISL_526982, EPI_ISL_526983, EPI_ISL_526984, EPI_ISL_526985, EPI_ISL_526986, EPI_ISL_526987, EPI_ISL_526988, EPI_ISL_526989, EPI_ISL_526990, EPI_ISL_526991, EPI_ISL_526992, EPI_ISL_526993, EPI_ISL_526994, EPI_ISL_526995, EPI_ISL_526996                                                                                                                                                                                                                                                                                                                                                                                                                                                                                                                                                                                                                                                                                                                                                                                                                                                                                                                                                                                                                                                                                                                                                                                                                                                                                                                                                                                                                                                                                                                                                                                                                                                                                                                                                                                                                                                                                                                                                                                                                                                                                                                                                                                                                                                                                                                                                                                                                                                                                                                                                                                                                                                                                                                                                                                                                                                                                                                                                                                                                                                                                                                                                                                                                                                                                                                                                                                                                                                                                                 | see above                                                                                                      | Biological prevention, army                                                            | Biological prevention, army                                                                                                      | Seadawy, M.G., Gad, A.F., Harty, B.E., Elhoseiny, M.F., Shamel, M.D.                                                                                                                                                                                                                                                                                            |
| EPI_ISL_526997, EPI_ISL_526998                                                                                                                                                                                                                                                                                                                                                                                                                                                                                                                                                                                                                                                                                                                                                                                                                                                                                                                                                                                                                                                                                                                                                                                                                                                                                                                                                                                                                                                                                                                                                                                                                                                                                                                                                                                                                                                                                                                                                                                                                                                                                                                                                                                                                                                                                                                                                                                                                                                                                                                                                                                                                                                                                                                                                                                                                                                                                                                                                                                                                                                                                                                                                                                                                                                                                                                                                                                                                                                                                                                                                                                                                                                                                                                                                                                                                                 | EPI_ISL_526997, EPI_ISL_526998                                                                                 | Biological prevention, army                                                            | Biological prevention, army                                                                                                      | Seadawy, M.G., Harty,B.E., Gad,A.F., Elhoseiny,M.F., Shamel,M.D., Shabaan,A.E., Ageez,A.M.                                                                                                                                                                                                                                                                      |
| EPI_ISL_526999, EPI_ISL_527000, EPI_ISL_527001                                                                                                                                                                                                                                                                                                                                                                                                                                                                                                                                                                                                                                                                                                                                                                                                                                                                                                                                                                                                                                                                                                                                                                                                                                                                                                                                                                                                                                                                                                                                                                                                                                                                                                                                                                                                                                                                                                                                                                                                                                                                                                                                                                                                                                                                                                                                                                                                                                                                                                                                                                                                                                                                                                                                                                                                                                                                                                                                                                                                                                                                                                                                                                                                                                                                                                                                                                                                                                                                                                                                                                                                                                                                                                                                                                                                                 | EPI_ISL_526999, EPI_ISL_527000, EPI_ISL_527001                                                                 | Biological prevention, army                                                            | Biological prevention, army                                                                                                      | Seadawy,M.G., Harty,B.E., Gad,A.F., Elhoseiny,M.F., Shamel,M.D., Shabaan,A.E., Ageez,A.M.                                                                                                                                                                                                                                                                       |
| EPI_ISL_527002                                                                                                                                                                                                                                                                                                                                                                                                                                                                                                                                                                                                                                                                                                                                                                                                                                                                                                                                                                                                                                                                                                                                                                                                                                                                                                                                                                                                                                                                                                                                                                                                                                                                                                                                                                                                                                                                                                                                                                                                                                                                                                                                                                                                                                                                                                                                                                                                                                                                                                                                                                                                                                                                                                                                                                                                                                                                                                                                                                                                                                                                                                                                                                                                                                                                                                                                                                                                                                                                                                                                                                                                                                                                                                                                                                                                                                                 | EPI_ISL_527002                                                                                                 | Biological prevention, army                                                            | Biological prevention, army                                                                                                      | Seadawy, M.G., Harty,B.E., Gad,A.F., Elhoseiny,M.F., Shamel,M.D., Shabaan,A.E., Ageez,A.M.                                                                                                                                                                                                                                                                      |
| EPI_ISL_527003, EPI_ISL_527004, EPI_ISL_527005, EPI_ISL_527006                                                                                                                                                                                                                                                                                                                                                                                                                                                                                                                                                                                                                                                                                                                                                                                                                                                                                                                                                                                                                                                                                                                                                                                                                                                                                                                                                                                                                                                                                                                                                                                                                                                                                                                                                                                                                                                                                                                                                                                                                                                                                                                                                                                                                                                                                                                                                                                                                                                                                                                                                                                                                                                                                                                                                                                                                                                                                                                                                                                                                                                                                                                                                                                                                                                                                                                                                                                                                                                                                                                                                                                                                                                                                                                                                                                                 | EPI_ISL_527003, EPI_ISL_527004, EPI_ISL_527005, EPI_ISL_527006                                                 | Biological prevention, army                                                            | Biological prevention, army                                                                                                      | Seadawy,M.G., Harty,B.E., Gad,A.F., Elhoseiny,M.F., Shamel,M.D., Shabaan,A.E., Ageez,A.M.                                                                                                                                                                                                                                                                       |
| EPI_ISL_527007                                                                                                                                                                                                                                                                                                                                                                                                                                                                                                                                                                                                                                                                                                                                                                                                                                                                                                                                                                                                                                                                                                                                                                                                                                                                                                                                                                                                                                                                                                                                                                                                                                                                                                                                                                                                                                                                                                                                                                                                                                                                                                                                                                                                                                                                                                                                                                                                                                                                                                                                                                                                                                                                                                                                                                                                                                                                                                                                                                                                                                                                                                                                                                                                                                                                                                                                                                                                                                                                                                                                                                                                                                                                                                                                                                                                                                                 | EPI_ISL_527007                                                                                                 | Biological Prevention, Army                                                            | Biological Prevention, Army                                                                                                      | Seadawy, M.G., Harty,B.E., Gad,A.F., Elhoseiny,M.F., Shamel,M.D., Shabaan,A.E., Ageez,A.M.                                                                                                                                                                                                                                                                      |

|                                                                                                                                                                                                                                                                                                                                                                                                                                                                                                                                                                                                                                                                                                                                                                                                                                                                                                                                                                                                                                                                                                                                                                                                                                                                                                                                                                                                                                                                                                                                                                                                                                                                                                                                                                                                                                                                                                                                                                                                                                                                                                                                                                                                                                                                                                                                                                                                                                                                                                                                                                                                                                                                                                                                                                                                                                                                                                                                                                                                                                                                                                                                                                                                                                                                                                                                                                                                                                                                                                                                                                                                                                                                                                                                                                                                                                                                                                                                                                                                                                                                                                                                                                                                                                                                                                                                                                                                                                                                                                                                                                                                                                                                                                                                                                                                                                                                                                                                                                                                                                                                                                                                                                                                                                                                |           |                                                                                                                                                                                  |                                                                                                                                                                                 |                                                                                                                                                                                                                                                                                                                                                              |
|----------------------------------------------------------------------------------------------------------------------------------------------------------------------------------------------------------------------------------------------------------------------------------------------------------------------------------------------------------------------------------------------------------------------------------------------------------------------------------------------------------------------------------------------------------------------------------------------------------------------------------------------------------------------------------------------------------------------------------------------------------------------------------------------------------------------------------------------------------------------------------------------------------------------------------------------------------------------------------------------------------------------------------------------------------------------------------------------------------------------------------------------------------------------------------------------------------------------------------------------------------------------------------------------------------------------------------------------------------------------------------------------------------------------------------------------------------------------------------------------------------------------------------------------------------------------------------------------------------------------------------------------------------------------------------------------------------------------------------------------------------------------------------------------------------------------------------------------------------------------------------------------------------------------------------------------------------------------------------------------------------------------------------------------------------------------------------------------------------------------------------------------------------------------------------------------------------------------------------------------------------------------------------------------------------------------------------------------------------------------------------------------------------------------------------------------------------------------------------------------------------------------------------------------------------------------------------------------------------------------------------------------------------------------------------------------------------------------------------------------------------------------------------------------------------------------------------------------------------------------------------------------------------------------------------------------------------------------------------------------------------------------------------------------------------------------------------------------------------------------------------------------------------------------------------------------------------------------------------------------------------------------------------------------------------------------------------------------------------------------------------------------------------------------------------------------------------------------------------------------------------------------------------------------------------------------------------------------------------------------------------------------------------------------------------------------------------------------------------------------------------------------------------------------------------------------------------------------------------------------------------------------------------------------------------------------------------------------------------------------------------------------------------------------------------------------------------------------------------------------------------------------------------------------------------------------------------------------------------------------------------------------------------------------------------------------------------------------------------------------------------------------------------------------------------------------------------------------------------------------------------------------------------------------------------------------------------------------------------------------------------------------------------------------------------------------------------------------------------------------------------------------------------------------------------------------------------------------------------------------------------------------------------------------------------------------------------------------------------------------------------------------------------------------------------------------------------------------------------------------------------------------------------------------------------------------------------------------------------------------------------------|-----------|----------------------------------------------------------------------------------------------------------------------------------------------------------------------------------|---------------------------------------------------------------------------------------------------------------------------------------------------------------------------------|--------------------------------------------------------------------------------------------------------------------------------------------------------------------------------------------------------------------------------------------------------------------------------------------------------------------------------------------------------------|
| EPI_ISL_527489, EPI_ISL_527490, EPI_ISL_527491, EPI_ISL_527492, EPI_ISL_527493, EPI_ISL_527494, EPI_ISL_527495, EPI_ISL_527496, EPI_ISL_527497, EPI_ISL_527498, EPI_ISL_527499, EPI_ISL_527500, EPI_ISL_527501, EPI_ISL_527502, EPI_ISL_527503, EPI_ISL_527504, EPI_ISL_527505, EPI_ISL_527506, EPI_ISL_527507, EPI_ISL_527508, EPI_ISL_527509, EPI_ISL_527510, EPI_ISL_527511, EPI_ISL_527512, EPI_ISL_527513, EPI_ISL_527514, EPI_ISL_527515, EPI_ISL_527516, EPI_ISL_527517, EPI_ISL_527518, EPI_ISL_527519, EPI_ISL_527520, EPI_ISL_527521, EPI_ISL_527522, EPI_ISL_527523, EPI_ISL_527524, EPI_ISL_527525, EPI_ISL_527526, EPI_ISL_527527, EPI_ISL_527528, EPI_ISL_527529, EPI_ISL_527530, EPI_ISL_527531, EPI_ISL_527532, EPI_ISL_527533, EPI_ISL_527534, EPI_ISL_527535, EPI_ISL_527536, EPI_ISL_527537, EPI_ISL_527538, EPI_ISL_527539, EPI_ISL_527540, EPI_ISL_527541, EPI_ISL_527542, EPI_ISL_527543, EPI_ISL_527544, EPI_ISL_527545, EPI_ISL_527546, EPI_ISL_527547, EPI_ISL_527548, EPI_ISL_527549, EPI_ISL_527550, EPI_ISL_527551, EPI_ISL_527552, EPI_ISL_527553, EPI_ISL_527554, EPI_ISL_527555, EPI_ISL_527556, EPI_ISL_527557, EPI_ISL_527558, EPI_ISL_527559, EPI_ISL_527560, EPI_ISL_527561, EPI_ISL_527562, EPI_ISL_527563, EPI_ISL_527564, EPI_ISL_527565, EPI_ISL_527566, EPI_ISL_527567, EPI_ISL_527568, EPI_ISL_527569, EPI_ISL_527570, EPI_ISL_527571, EPI_ISL_527572                                                                                                                                                                                                                                                                                                                                                                                                                                                                                                                                                                                                                                                                                                                                                                                                                                                                                                                                                                                                                                                                                                                                                                                                                                                                                                                                                                                                                                                                                                                                                                                                                                                                                                                                                                                                                                                                                                                                                                                                                                                                                                                                                                                                                                                                                                                                                                                                                                                                                                                                                                                                                                                                                                                                                                                                                                                                                                                                                                                                                                                                                                                                                                                                                                                                                                                                                                                                                                                                                                                                                                                                                                                                                                                                                                                                                                                                 | see above | Viral Respiratory Lab, National Institute for Biomedical Research (INRB)                                                                                                         | Pathogen Sequencing Lab, National Institute for Biomedical Research (INRB)                                                                                                      | Placide Mbala-Kingebeni, Edith Nkwembe, Eddy Kinganda-Lusamaki, Amori Aziza, Francisca Muyembe Mawete, Emmanuel Lokilo Lofiko, Catherine Pratt, Matthias Pauthner, Josh Quick, Allison Black, James Hadfield, Trevor Bedford, Ian Goodfellow, Andrew Rambaut, Nick Loman, Kristian Andersen, Michael Wiley, Steve Ahuka-Mundeke, Jean-Jacques Muyembe Tamfum |
| EPI_ISL_527872, EPI_ISL_527874, EPI_ISL_527875, EPI_ISL_527876, EPI_ISL_527877, EPI_ISL_527878, EPI_ISL_527879, EPI_ISL_527880, EPI_ISL_527881, EPI_ISL_527882, EPI_ISL_527883, EPI_ISL_527884, EPI_ISL_527885, EPI_ISL_527886, EPI_ISL_527887, EPI_ISL_527888, EPI_ISL_527889, EPI_ISL_527890, EPI_ISL_527891, EPI_ISL_527892, EPI_ISL_527893, EPI_ISL_527894, EPI_ISL_527895, EPI_ISL_527896, EPI_ISL_527897, EPI_ISL_527898, EPI_ISL_527899, EPI_ISL_527900, EPI_ISL_527901, EPI_ISL_527902, EPI_ISL_527903, EPI_ISL_527904, EPI_ISL_527905, EPI_ISL_527906, EPI_ISL_527907, EPI_ISL_527908, EPI_ISL_527909, EPI_ISL_527910, EPI_ISL_527911, EPI_ISL_527912, EPI_ISL_527913, EPI_ISL_527914, EPI_ISL_527915                                                                                                                                                                                                                                                                                                                                                                                                                                                                                                                                                                                                                                                                                                                                                                                                                                                                                                                                                                                                                                                                                                                                                                                                                                                                                                                                                                                                                                                                                                                                                                                                                                                                                                                                                                                                                                                                                                                                                                                                                                                                                                                                                                                                                                                                                                                                                                                                                                                                                                                                                                                                                                                                                                                                                                                                                                                                                                                                                                                                                                                                                                                                                                                                                                                                                                                                                                                                                                                                                                                                                                                                                                                                                                                                                                                                                                                                                                                                                                                                                                                                                                                                                                                                                                                                                                                                                                                                                                                                                                                                                 | see above | Nigeria Centre for Disease Control (NCDC)                                                                                                                                        | African Centre of Excellence for Genomics of Infectious Diseases (ACEGID), Redeemer's University, Ede, Osun State, Nigeria                                                      | Oluniji P.E. et al                                                                                                                                                                                                                                                                                                                                           |
| EPI_ISL_528386                                                                                                                                                                                                                                                                                                                                                                                                                                                                                                                                                                                                                                                                                                                                                                                                                                                                                                                                                                                                                                                                                                                                                                                                                                                                                                                                                                                                                                                                                                                                                                                                                                                                                                                                                                                                                                                                                                                                                                                                                                                                                                                                                                                                                                                                                                                                                                                                                                                                                                                                                                                                                                                                                                                                                                                                                                                                                                                                                                                                                                                                                                                                                                                                                                                                                                                                                                                                                                                                                                                                                                                                                                                                                                                                                                                                                                                                                                                                                                                                                                                                                                                                                                                                                                                                                                                                                                                                                                                                                                                                                                                                                                                                                                                                                                                                                                                                                                                                                                                                                                                                                                                                                                                                                                                 |           | Viral vaccines, VSVRI- Veterinary serum and vaccine research institute                                                                                                           | Viral vaccines, VSVRI- Veterinary serum and vaccine research institute                                                                                                          | Saleh,A.A., Saad,M.A.                                                                                                                                                                                                                                                                                                                                        |
| EPI_ISL_529031                                                                                                                                                                                                                                                                                                                                                                                                                                                                                                                                                                                                                                                                                                                                                                                                                                                                                                                                                                                                                                                                                                                                                                                                                                                                                                                                                                                                                                                                                                                                                                                                                                                                                                                                                                                                                                                                                                                                                                                                                                                                                                                                                                                                                                                                                                                                                                                                                                                                                                                                                                                                                                                                                                                                                                                                                                                                                                                                                                                                                                                                                                                                                                                                                                                                                                                                                                                                                                                                                                                                                                                                                                                                                                                                                                                                                                                                                                                                                                                                                                                                                                                                                                                                                                                                                                                                                                                                                                                                                                                                                                                                                                                                                                                                                                                                                                                                                                                                                                                                                                                                                                                                                                                                                                                 |           | Central Molecular Microbiology Laboratory, Clinical and Chemical Pathology Department, Faculty of Medicine, CAIRO UNIVERSITY                                                     | Next Generation Sequencing Reference Laboratory, Faculty of Medicine, Cairo University and The Center for Genome and Microbiome Research, Faculty of Pharmacy, CAIRO UNIVERSITY | May Sherif Soliman, May Abdelfattah, Ramy Karam Aziz                                                                                                                                                                                                                                                                                                         |
| EPI_ISL_529032                                                                                                                                                                                                                                                                                                                                                                                                                                                                                                                                                                                                                                                                                                                                                                                                                                                                                                                                                                                                                                                                                                                                                                                                                                                                                                                                                                                                                                                                                                                                                                                                                                                                                                                                                                                                                                                                                                                                                                                                                                                                                                                                                                                                                                                                                                                                                                                                                                                                                                                                                                                                                                                                                                                                                                                                                                                                                                                                                                                                                                                                                                                                                                                                                                                                                                                                                                                                                                                                                                                                                                                                                                                                                                                                                                                                                                                                                                                                                                                                                                                                                                                                                                                                                                                                                                                                                                                                                                                                                                                                                                                                                                                                                                                                                                                                                                                                                                                                                                                                                                                                                                                                                                                                                                                 |           | Central Molecular Microbiology Laboratory and Next Generation Sequencing Reference Laboratory, Clinical and Chemical Pathology Department, Faculty of Medicine, CAIRO UNIVERSITY | Next Generation Sequencing Reference Laboratory, Faculty of Medicine, CAIRO UNIVERSITY and The Center for Genome and Microbiome Research, Faculty of Pharmacy, CAIRO UNIVERSITY | May Sherif Soliman, May Abdelfattah, Ramy Karam Aziz                                                                                                                                                                                                                                                                                                         |
| EPI_ISL_529141, EPI_ISL_529142, EPI_ISL_529143, EPI_ISL_529144, EPI_ISL_529145                                                                                                                                                                                                                                                                                                                                                                                                                                                                                                                                                                                                                                                                                                                                                                                                                                                                                                                                                                                                                                                                                                                                                                                                                                                                                                                                                                                                                                                                                                                                                                                                                                                                                                                                                                                                                                                                                                                                                                                                                                                                                                                                                                                                                                                                                                                                                                                                                                                                                                                                                                                                                                                                                                                                                                                                                                                                                                                                                                                                                                                                                                                                                                                                                                                                                                                                                                                                                                                                                                                                                                                                                                                                                                                                                                                                                                                                                                                                                                                                                                                                                                                                                                                                                                                                                                                                                                                                                                                                                                                                                                                                                                                                                                                                                                                                                                                                                                                                                                                                                                                                                                                                                                                 |           | Egyptian National Cancer Institute (ENCI)                                                                                                                                        | Egyptian National Cancer Institute (ENCI)                                                                                                                                       | Zekri, Abdel Rahman N., Amer,K.E., Ahmed,O.S., Soliman,H.K., Ali,M.A., Hassan,W.A., Mahmoud,A.A., Khatib,A.A., Hafez,M.M., Abouelhoda, Mohamed                                                                                                                                                                                                               |
| EPI_ISL_529720, EPI_ISL_529721, EPI_ISL_529722, EPI_ISL_529723, EPI_ISL_529724, EPI_ISL_529725, EPI_ISL_529726, EPI_ISL_529727, EPI_ISL_529728, EPI_ISL_529729, EPI_ISL_529730, EPI_ISL_529731, EPI_ISL_529732, EPI_ISL_529733, EPI_ISL_529734, EPI_ISL_529735, EPI_ISL_529736, EPI_ISL_529737, EPI_ISL_529738, EPI_ISL_529739, EPI_ISL_529740, EPI_ISL_529741, EPI_ISL_529742, EPI_ISL_529743, EPI_ISL_529744, EPI_ISL_529745, EPI_ISL_529746, EPI_ISL_529747, EPI_ISL_529748, EPI_ISL_529749, EPI_ISL_529750, EPI_ISL_529751, EPI_ISL_529752, EPI_ISL_529753, EPI_ISL_529754, EPI_ISL_529755, EPI_ISL_529756, EPI_ISL_529757, EPI_ISL_529758, EPI_ISL_529759, EPI_ISL_529760, EPI_ISL_529761, EPI_ISL_529762, EPI_ISL_529763, EPI_ISL_529764, EPI_ISL_529765, EPI_ISL_529766, EPI_ISL_529767, EPI_ISL_529768, EPI_ISL_529769, EPI_ISL_529770, EPI_ISL_529771, EPI_ISL_529772, EPI_ISL_529773, EPI_ISL_529774, EPI_ISL_529775, EPI_ISL_529776, EPI_ISL_529777, EPI_ISL_529778, EPI_ISL_529779, EPI_ISL_529780, EPI_ISL_529781, EPI_ISL_529782, EPI_ISL_529783, EPI_ISL_529784, EPI_ISL_529785, EPI_ISL_529786, EPI_ISL_529787, EPI_ISL_529788, EPI_ISL_529789, EPI_ISL_529790, EPI_ISL_529791, EPI_ISL_529792, EPI_ISL_529793, EPI_ISL_529794, EPI_ISL_529795, EPI_ISL_529796, EPI_ISL_529797, EPI_ISL_529798, EPI_ISL_529799, EPI_ISL_529800, EPI_ISL_529801, EPI_ISL_529802, EPI_ISL_529803, EPI_ISL_529804, EPI_ISL_529805, EPI_ISL_529806, EPI_ISL_529807, EPI_ISL_529808, EPI_ISL_529809, EPI_ISL_529810, EPI_ISL_529811, EPI_ISL_529812, EPI_ISL_529813, EPI_ISL_529814, EPI_ISL_529815, EPI_ISL_529816, EPI_ISL_529817, EPI_ISL_529818, EPI_ISL_529819, EPI_ISL_529820, EPI_ISL_529821, EPI_ISL_529822, EPI_ISL_529823, EPI_ISL_529824, EPI_ISL_529825, EPI_ISL_529826, EPI_ISL_529827, EPI_ISL_529828, EPI_ISL_529829, EPI_ISL_529830, EPI_ISL_529831, EPI_ISL_529832, EPI_ISL_529833, EPI_ISL_529834, EPI_ISL_529835, EPI_ISL_529836, EPI_ISL_529837, EPI_ISL_529838, EPI_ISL_529839, EPI_ISL_529840, EPI_ISL_529841, EPI_ISL_529842, EPI_ISL_529843, EPI_ISL_529844, EPI_ISL_529845, EPI_ISL_529846, EPI_ISL_529847, EPI_ISL_529848, EPI_ISL_529849, EPI_ISL_529850, EPI_ISL_529851, EPI_ISL_529852, EPI_ISL_529853, EPI_ISL_529854, EPI_ISL_529855, EPI_ISL_529856, EPI_ISL_529857, EPI_ISL_529858, EPI_ISL_529859, EPI_ISL_529860, EPI_ISL_529861, EPI_ISL_529862, EPI_ISL_529863, EPI_ISL_529864, EPI_ISL_529865, EPI_ISL_529866, EPI_ISL_529867, EPI_ISL_529868, EPI_ISL_529869, EPI_ISL_529870, EPI_ISL_529871, EPI_ISL_529872, EPI_ISL_529873, EPI_ISL_529874, EPI_ISL_529875, EPI_ISL_529876, EPI_ISL_529877, EPI_ISL_529878, EPI_ISL_529879, EPI_ISL_529880, EPI_ISL_529881, EPI_ISL_529882, EPI_ISL_529883, EPI_ISL_529884, EPI_ISL_529885, EPI_ISL_529886, EPI_ISL_529887, EPI_ISL_529888, EPI_ISL_529889, EPI_ISL_529890, EPI_ISL_529891, EPI_ISL_529892, EPI_ISL_529893, EPI_ISL_529894, EPI_ISL_529895, EPI_ISL_529896, EPI_ISL_529897, EPI_ISL_529898, EPI_ISL_529899, EPI_ISL_529900, EPI_ISL_529901, EPI_ISL_529902, EPI_ISL_529903, EPI_ISL_529904, EPI_ISL_529905, EPI_ISL_529906, EPI_ISL_529907, EPI_ISL_529908, EPI_ISL_529909, EPI_ISL_529910, EPI_ISL_529911, EPI_ISL_529912, EPI_ISL_529913, EPI_ISL_529914, EPI_ISL_529915                                                                                                                                                                                                                                                                                                                                                                                                                                                                                                                                                                                                                                                                                                                                                                                                                                                                                                                                                                                                                                                                                                                                                                                                                                                                                                                                                                                                                                                                                                                                                                                                                                                                                                                                                                                                                                                                                                                                                                                                 |           |                                                                                                                                                                                  |                                                                                                                                                                                 |                                                                                                                                                                                                                                                                                                                                                              |
| EPI_ISL_535396, EPI_ISL_535397, EPI_ISL_535398, EPI_ISL_535399, EPI_ISL_535400, EPI_ISL_535401, EPI_ISL_535402, EPI_ISL_535403, EPI_ISL_535404, EPI_ISL_535405, EPI_ISL_535406, EPI_ISL_535407, EPI_ISL_535408, EPI_ISL_535409, EPI_ISL_535410, EPI_ISL_535411, EPI_ISL_535412, EPI_ISL_535413, EPI_ISL_535414, EPI_ISL_535415, EPI_ISL_535416, EPI_ISL_535417, EPI_ISL_535418, EPI_ISL_535419, EPI_ISL_535420, EPI_ISL_535421, EPI_ISL_535422, EPI_ISL_535423, EPI_ISL_535424, EPI_ISL_535425, EPI_ISL_535426, EPI_ISL_535427, EPI_ISL_535428, EPI_ISL_535429, EPI_ISL_535430, EPI_ISL_535431, EPI_ISL_535432, EPI_ISL_535433, EPI_ISL_535434, EPI_ISL_535435, EPI_ISL_535436, EPI_ISL_535437, EPI_ISL_535438, EPI_ISL_535439, EPI_ISL_535440, EPI_ISL_535441, EPI_ISL_535442, EPI_ISL_535443, EPI_ISL_535444, EPI_ISL_535445, EPI_ISL_535446, EPI_ISL_535447, EPI_ISL_535448, EPI_ISL_535449, EPI_ISL_535450, EPI_ISL_535451, EPI_ISL_535452, EPI_ISL_535453, EPI_ISL_535454, EPI_ISL_535455, EPI_ISL_535456, EPI_ISL_535457, EPI_ISL_535458, EPI_ISL_535459, EPI_ISL_535460, EPI_ISL_535461, EPI_ISL_535462, EPI_ISL_535463, EPI_ISL_535464, EPI_ISL_535465, EPI_ISL_535466, EPI_ISL_535467, EPI_ISL_535468, EPI_ISL_535469, EPI_ISL_535470, EPI_ISL_535471, EPI_ISL_535472, EPI_ISL_535473, EPI_ISL_535474, EPI_ISL_535475, EPI_ISL_535476, EPI_ISL_535477, EPI_ISL_535478, EPI_ISL_535479, EPI_ISL_535480, EPI_ISL_535481, EPI_ISL_535482, EPI_ISL_535483, EPI_ISL_535484, EPI_ISL_535485, EPI_ISL_535486, EPI_ISL_535487, EPI_ISL_535488, EPI_ISL_535489, EPI_ISL_535490, EPI_ISL_535491, EPI_ISL_535492, EPI_ISL_535493, EPI_ISL_535494, EPI_ISL_535495, EPI_ISL_535496, EPI_ISL_535497, EPI_ISL_535498, EPI_ISL_535499, EPI_ISL_535500, EPI_ISL_535501, EPI_ISL_535502, EPI_ISL_535503, EPI_ISL_535504, EPI_ISL_535505, EPI_ISL_535506, EPI_ISL_535507, EPI_ISL_535508, EPI_ISL_535509, EPI_ISL_535510, EPI_ISL_535511, EPI_ISL_535512, EPI_ISL_535513, EPI_ISL_535514, EPI_ISL_535515, EPI_ISL_535516, EPI_ISL_535517, EPI_ISL_535518, EPI_ISL_535519, EPI_ISL_535520, EPI_ISL_535521, EPI_ISL_535522, EPI_ISL_535523, EPI_ISL_535524, EPI_ISL_535525, EPI_ISL_535526, EPI_ISL_535527, EPI_ISL_535528, EPI_ISL_535529, EPI_ISL_535530, EPI_ISL_535531, EPI_ISL_535532, EPI_ISL_535533, EPI_ISL_535534, EPI_ISL_535535, EPI_ISL_535536, EPI_ISL_535537, EPI_ISL_535538, EPI_ISL_535539, EPI_ISL_535540, EPI_ISL_535541, EPI_ISL_535542, EPI_ISL_535543, EPI_ISL_535544, EPI_ISL_535545, EPI_ISL_535546, EPI_ISL_535547, EPI_ISL_535548, EPI_ISL_535549, EPI_ISL_535550, EPI_ISL_535551, EPI_ISL_535552, EPI_ISL_535553, EPI_ISL_535554, EPI_ISL_535555, EPI_ISL_535556, EPI_ISL_535557, EPI_ISL_535558, EPI_ISL_535559, EPI_ISL_535560, EPI_ISL_535561, EPI_ISL_535562, EPI_ISL_535563, EPI_ISL_535564, EPI_ISL_535565, EPI_ISL_535566, EPI_ISL_535567, EPI_ISL_535568, EPI_ISL_535569, EPI_ISL_535570, EPI_ISL_535571, EPI_ISL_535572                                                                                                                                                                                                                                                                                                                                                                                                                                                                                                                                                                                                                                                                                                                                                                                                                                                                                                                                                                                                                                                                                                                                                                                                                                                                                                                                                                                                                                                                                                                                                                                                                                                                                                                                                                                                                                                                                                                                                                                                                                                                                                                                                                                                                                                                                                                 |           |                                                                                                                                                                                  |                                                                                                                                                                                 |                                                                                                                                                                                                                                                                                                                                                              |
| see above                                                                                                                                                                                                                                                                                                                                                                                                                                                                                                                                                                                                                                                                                                                                                                                                                                                                                                                                                                                                                                                                                                                                                                                                                                                                                                                                                                                                                                                                                                                                                                                                                                                                                                                                                                                                                                                                                                                                                                                                                                                                                                                                                                                                                                                                                                                                                                                                                                                                                                                                                                                                                                                                                                                                                                                                                                                                                                                                                                                                                                                                                                                                                                                                                                                                                                                                                                                                                                                                                                                                                                                                                                                                                                                                                                                                                                                                                                                                                                                                                                                                                                                                                                                                                                                                                                                                                                                                                                                                                                                                                                                                                                                                                                                                                                                                                                                                                                                                                                                                                                                                                                                                                                                                                                                      |           | NHLS-IALCH                                                                                                                                                                       | KRISP, KZN Research Innovation and Sequencing Platform                                                                                                                          | Giandhara J, Pillay S, Lessells R, Mdlalose K, York D, Khan S, Tegally H, Wilkinson E, de Oliveira T                                                                                                                                                                                                                                                         |
| EPI_ISL_539573, EPI_ISL_539574, EPI_ISL_539575, EPI_ISL_539576                                                                                                                                                                                                                                                                                                                                                                                                                                                                                                                                                                                                                                                                                                                                                                                                                                                                                                                                                                                                                                                                                                                                                                                                                                                                                                                                                                                                                                                                                                                                                                                                                                                                                                                                                                                                                                                                                                                                                                                                                                                                                                                                                                                                                                                                                                                                                                                                                                                                                                                                                                                                                                                                                                                                                                                                                                                                                                                                                                                                                                                                                                                                                                                                                                                                                                                                                                                                                                                                                                                                                                                                                                                                                                                                                                                                                                                                                                                                                                                                                                                                                                                                                                                                                                                                                                                                                                                                                                                                                                                                                                                                                                                                                                                                                                                                                                                                                                                                                                                                                                                                                                                                                                                                 |           | Centre de Recherches Medicales de Lambarene (CERME)                                                                                                                              | Department of Emerging Infectious Diseases, Institute of Tropical Medicine, Nagasaki University                                                                                 | Haruku Abe, Yuri Ushijima, Rodrigue Bikanguji, Akim A. Adegnika, Bertrand Lell, Jiro Yasuda                                                                                                                                                                                                                                                                  |
| EPI_ISL_560385                                                                                                                                                                                                                                                                                                                                                                                                                                                                                                                                                                                                                                                                                                                                                                                                                                                                                                                                                                                                                                                                                                                                                                                                                                                                                                                                                                                                                                                                                                                                                                                                                                                                                                                                                                                                                                                                                                                                                                                                                                                                                                                                                                                                                                                                                                                                                                                                                                                                                                                                                                                                                                                                                                                                                                                                                                                                                                                                                                                                                                                                                                                                                                                                                                                                                                                                                                                                                                                                                                                                                                                                                                                                                                                                                                                                                                                                                                                                                                                                                                                                                                                                                                                                                                                                                                                                                                                                                                                                                                                                                                                                                                                                                                                                                                                                                                                                                                                                                                                                                                                                                                                                                                                                                                                 |           | National Health Laboratory                                                                                                                                                       | Botswana Institute for Technology Research and Innovation                                                                                                                       | Kefentse Arnold Tumed, Madisa Mine, Dineo Emang Tshiamo, Gape Nyepetsi, Thongbotho Mphoyakgosi, Maithwarelo Ignatius Matsheka                                                                                                                                                                                                                                |
| EPI_ISL_560386                                                                                                                                                                                                                                                                                                                                                                                                                                                                                                                                                                                                                                                                                                                                                                                                                                                                                                                                                                                                                                                                                                                                                                                                                                                                                                                                                                                                                                                                                                                                                                                                                                                                                                                                                                                                                                                                                                                                                                                                                                                                                                                                                                                                                                                                                                                                                                                                                                                                                                                                                                                                                                                                                                                                                                                                                                                                                                                                                                                                                                                                                                                                                                                                                                                                                                                                                                                                                                                                                                                                                                                                                                                                                                                                                                                                                                                                                                                                                                                                                                                                                                                                                                                                                                                                                                                                                                                                                                                                                                                                                                                                                                                                                                                                                                                                                                                                                                                                                                                                                                                                                                                                                                                                                                                 |           | National Health Laboratory                                                                                                                                                       | Botswana Institute for Technology Research and innovation                                                                                                                       | Kefentse Arnold Tumed, Madisa Mine, Dineo Emang Tshiamo, Gape Nyepetsi, Thongbotho Mphoyakgosi, Maithwarelo Ignatius Matsheka                                                                                                                                                                                                                                |
| EPI_ISL_560387, EPI_ISL_560388, EPI_ISL_560389, EPI_ISL_560390                                                                                                                                                                                                                                                                                                                                                                                                                                                                                                                                                                                                                                                                                                                                                                                                                                                                                                                                                                                                                                                                                                                                                                                                                                                                                                                                                                                                                                                                                                                                                                                                                                                                                                                                                                                                                                                                                                                                                                                                                                                                                                                                                                                                                                                                                                                                                                                                                                                                                                                                                                                                                                                                                                                                                                                                                                                                                                                                                                                                                                                                                                                                                                                                                                                                                                                                                                                                                                                                                                                                                                                                                                                                                                                                                                                                                                                                                                                                                                                                                                                                                                                                                                                                                                                                                                                                                                                                                                                                                                                                                                                                                                                                                                                                                                                                                                                                                                                                                                                                                                                                                                                                                                                                 |           | National Health Laboratory                                                                                                                                                       | Botswana Institute for Technology Research and Innovation                                                                                                                       | Kefentse Arnold Tumed, Madisa Mine, Dineo Emang Tshiamo, Gape Nyepetsi, Thongbotho Mphoyakgosi, Maithwarelo Ignatius Matsheka                                                                                                                                                                                                                                |
| EPI_ISL_560992, EPI_ISL_560993, EPI_ISL_560994, EPI_ISL_560995, EPI_ISL_560996, EPI_ISL_560997, EPI_ISL_560998, EPI_ISL_560999, EPI_ISL_561000, EPI_ISL_561001, EPI_ISL_561002, EPI_ISL_561003, EPI_ISL_561004, EPI_ISL_561005, EPI_ISL_561006, EPI_ISL_561007, EPI_ISL_561008, EPI_ISL_561009, EPI_ISL_561010, EPI_ISL_561011, EPI_ISL_561012, EPI_ISL_561013, EPI_ISL_561014, EPI_ISL_561015, EPI_ISL_561016, EPI_ISL_561017, EPI_ISL_561018, EPI_ISL_561019, EPI_ISL_561020, EPI_ISL_561021, EPI_ISL_561022, EPI_ISL_561023, EPI_ISL_561024, EPI_ISL_561025, EPI_ISL_561026, EPI_ISL_561027, EPI_ISL_561028, EPI_ISL_561029, EPI_ISL_561030, EPI_ISL_561031, EPI_ISL_561032, EPI_ISL_561033, EPI_ISL_561034, EPI_ISL_561035, EPI_ISL_561036, EPI_ISL_561037, EPI_ISL_561038, EPI_ISL_561039, EPI_ISL_561040, EPI_ISL_561041, EPI_ISL_561042, EPI_ISL_561043, EPI_ISL_561044, EPI_ISL_561045, EPI_ISL_561046, EPI_ISL_561047, EPI_ISL_561048, EPI_ISL_561049, EPI_ISL_561050, EPI_ISL_561051, EPI_ISL_561052, EPI_ISL_561053, EPI_ISL_561054, EPI_ISL_561055, EPI_ISL_561056, EPI_ISL_561057, EPI_ISL_561058, EPI_ISL_561059, EPI_ISL_561060, EPI_ISL_561061, EPI_ISL_561062, EPI_ISL_561063, EPI_ISL_561064, EPI_ISL_561065, EPI_ISL_561066, EPI_ISL_561067, EPI_ISL_561068, EPI_ISL_561069, EPI_ISL_561070, EPI_ISL_561071, EPI_ISL_561072, EPI_ISL_561073, EPI_ISL_561074, EPI_ISL_561075, EPI_ISL_561076, EPI_ISL_561077, EPI_ISL_561078, EPI_ISL_561079, EPI_ISL_561080, EPI_ISL_561081, EPI_ISL_561082, EPI_ISL_561083, EPI_ISL_561084, EPI_ISL_561085, EPI_ISL_561086, EPI_ISL_561087, EPI_ISL_561088, EPI_ISL_561089, EPI_ISL_561090, EPI_ISL_561091, EPI_ISL_561092, EPI_ISL_561093, EPI_ISL_561094, EPI_ISL_561095, EPI_ISL_561096, EPI_ISL_561097, EPI_ISL_561098, EPI_ISL_561099, EPI_ISL_561100, EPI_ISL_561101, EPI_ISL_561102, EPI_ISL_561103, EPI_ISL_561104, EPI_ISL_561105, EPI_ISL_561106, EPI_ISL_561107, EPI_ISL_561108, EPI_ISL_561109, EPI_ISL_561110, EPI_ISL_561111, EPI_ISL_561112, EPI_ISL_561113, EPI_ISL_561114, EPI_ISL_561115, EPI_ISL_561116, EPI_ISL_561117, EPI_ISL_561118, EPI_ISL_561119, EPI_ISL_561120, EPI_ISL_561121, EPI_ISL_561122, EPI_ISL_561123, EPI_ISL_561124, EPI_ISL_561125, EPI_ISL_561126, EPI_ISL_561127, EPI_ISL_561128, EPI_ISL_561129, EPI_ISL_561130, EPI_ISL_561131, EPI_ISL_561132, EPI_ISL_561133, EPI_ISL_561134, EPI_ISL_561135, EPI_ISL_561136, EPI_ISL_561137, EPI_ISL_561138, EPI_ISL_561139, EPI_ISL_561140, EPI_ISL_561141, EPI_ISL_561142, EPI_ISL_561143, EPI_ISL_561144, EPI_ISL_561145, EPI_ISL_561146, EPI_ISL_561147, EPI_ISL_561148, EPI_ISL_561149, EPI_ISL_561150, EPI_ISL_561151, EPI_ISL_561152, EPI_ISL_561153, EPI_ISL_561154, EPI_ISL_561155, EPI_ISL_561156, EPI_ISL_561157, EPI_ISL_561158, EPI_ISL_561159, EPI_ISL_561160, EPI_ISL_561161, EPI_ISL_561162, EPI_ISL_561163, EPI_ISL_561164, EPI_ISL_561165, EPI_ISL_561166, EPI_ISL_561167, EPI_ISL_561168, EPI_ISL_561169, EPI_ISL_561170, EPI_ISL_561171, EPI_ISL_561172, EPI_ISL_561173, EPI_ISL_561174, EPI_ISL_561175, EPI_ISL_561176, EPI_ISL_561177, EPI_ISL_561178, EPI_ISL_561179, EPI_ISL_561180, EPI_ISL_561181, EPI_ISL_561182, EPI_ISL_561183, EPI_ISL_561184, EPI_ISL_561185, EPI_ISL_561186, EPI_ISL_561187, EPI_ISL_561188, EPI_ISL_561189, EPI_ISL_561190, EPI_ISL_561191, EPI_ISL_561192, EPI_ISL_561193, EPI_ISL_561194, EPI_ISL_561195, EPI_ISL_561196, EPI_ISL_561197, EPI_ISL_561198, EPI_ISL_561199, EPI_ISL_561200, EPI_ISL_561201, EPI_ISL_561202, EPI_ISL_561203, EPI_ISL_561204, EPI_ISL_561205, EPI_ISL_561206, EPI_ISL_561207, EPI_ISL_561208, EPI_ISL_561209, EPI_ISL_561210, EPI_ISL_561211, EPI_ISL_561212, EPI_ISL_561213, EPI_ISL_561214, EPI_ISL_561215, EPI_ISL_561216, EPI_ISL_561217, EPI_ISL_561218, EPI_ISL_561219, EPI_ISL_561220, EPI_ISL_561221, EPI_ISL_561222, EPI_ISL_561223, EPI_ISL_561224, EPI_ISL_561225, EPI_ISL_561226, EPI_ISL_561227, EPI_ISL_561228, EPI_ISL_561229, EPI_ISL_561230, EPI_ISL_561231, EPI_ISL_561232, EPI_ISL_561233, EPI_ISL_561234, EPI_ISL_561235, EPI_ISL_561236, EPI_ISL_561237, EPI_ISL_561238, EPI_ISL_561239, EPI_ISL_561240, EPI_ISL_561241, EPI_ISL_561242, EPI_ISL_561243, EPI_ISL_561244, EPI_ISL_561245, EPI_ISL_561246, EPI_ISL_561247, EPI_ISL_561248, EPI_ISL_561249, EPI_ISL_561250, EPI_ISL_561251, EPI_ISL_561252, EPI_ISL_561253, EPI_ISL_561254, EPI_ISL_561255, EPI_ISL_561256, EPI_ISL_561257, EPI_ISL_561258, EPI_ISL_561259, EPI_ISL_561260, EPI_ISL_561261, EPI_ISL_561262, EPI_ISL_561263, EPI_ISL_561264, EPI_ISL_561265, EPI_ISL_561266, EPI_ISL_561267, EPI_ISL_561268, EPI_ISL_561269, EPI_ISL_561270, EPI_ISL_561271, EPI_ISL_561272, EPI_ISL_561273, EPI_ISL_561274, EPI_ISL_561275, EPI_ISL_561276, EPI_ISL_561277, EPI_ISL_561278, EPI_ISL_561279, EPI_ISL_561280, EPI_ISL_561281, EPI_ISL_561282, EPI_ISL_561283, EPI_ISL_561284, EPI_ISL_561285, EPI_ISL_561286, EPI_ISL_561287, EPI_ISL_561288, EPI_ISL_561289, EPI_ISL_561290, EPI_ISL_561291, EPI_ISL_561292, EPI_ISL_561293, EPI_ISL_561294, EPI_ISL_561295, EPI_ISL_561297, EPI_ISL_561302, EPI_ISL_561304, EPI_ISL_561309, EPI_ISL_561310, EPI_ISL_561312, EPI_ISL_561315, EPI_ISL_561316, EPI_ISL_561319, EPI_ISL_561322, EPI_ISL_561325, EPI_ISL_561328 |           |                                                                                                                                                                                  |                                                                                                                                                                                 |                                                                                                                                                                                                                                                                                                                                                              |
| see above                                                                                                                                                                                                                                                                                                                                                                                                                                                                                                                                                                                                                                                                                                                                                                                                                                                                                                                                                                                                                                                                                                                                                                                                                                                                                                                                                                                                                                                                                                                                                                                                                                                                                                                                                                                                                                                                                                                                                                                                                                                                                                                                                                                                                                                                                                                                                                                                                                                                                                                                                                                                                                                                                                                                                                                                                                                                                                                                                                                                                                                                                                                                                                                                                                                                                                                                                                                                                                                                                                                                                                                                                                                                                                                                                                                                                                                                                                                                                                                                                                                                                                                                                                                                                                                                                                                                                                                                                                                                                                                                                                                                                                                                                                                                                                                                                                                                                                                                                                                                                                                                                                                                                                                                                                                      |           | MRCG at LSHTM Genomics lab                                                                                                                                                       | MRCG at LSHTM Genomics lab                                                                                                                                                      | Abdul Karim sesay, Abdoullie Kante, Jarra Manneh, Mariama Kujabi, Bakary Sanyang                                                                                                                                                                                                                                                                             |
| EPI_ISL_568695, EPI_ISL_568696, EPI_ISL_568697, EPI_ISL_568698, EPI_ISL_568699, EPI_ISL_568700, EPI_ISL_568701, EPI_ISL_568702, EPI_ISL_568703, EPI_ISL_568704, EPI_ISL_568705, EPI_ISL_568706, EPI_ISL_568707, EPI_ISL_568708, EPI_ISL_568709, EPI_ISL_568710, EPI_ISL_568711, EPI_ISL_568712, EPI_ISL_568713, EPI_ISL_568714, EPI_ISL_568715, EPI_ISL_568716, EPI_ISL_568717, EPI_ISL_568718, EPI_ISL_568719, EPI_ISL_568720, EPI_ISL_568721, EPI_ISL_568722, EPI_ISL_568723, EPI_ISL_568724, EPI_ISL_568725, EPI_ISL_568726, EPI_ISL_568727, EPI_ISL_568728, EPI_ISL_568729, EPI_ISL_568730, EPI_ISL_568731, EPI_ISL_568732, EPI_ISL_568733, EPI_ISL_568734, EPI_ISL_568735, EPI_ISL_568736, EPI_ISL_568737, EPI_ISL_568738, EPI_ISL_568739, EPI_ISL_568740, EPI_ISL_568741, EPI_ISL_568742, EPI_ISL_568743, EPI_ISL_568744, EPI_ISL_568745, EPI_ISL_568746, EPI_ISL_568747, EPI_ISL_568748, EPI_ISL_568749, EPI_ISL_568750, EPI_ISL_568751, EPI_ISL_568752, EPI_ISL_568753, EPI_ISL_568754, EPI_ISL_568755, EPI_ISL_568756, EPI_ISL_568757, EPI_ISL_568758, EPI_ISL_568759, EPI_ISL_568760, EPI_ISL_568761, EPI_ISL_568762, EPI_ISL_568763, EPI_ISL_568764, EPI_ISL_568765, EPI_ISL_568766, EPI_ISL_568767, EPI_ISL_568768, EPI_ISL_568769, EPI_ISL_568770, EPI_ISL_568771, EPI_ISL_568772, EPI_ISL_568773, EPI_ISL_568774, EPI_ISL_568775, EPI_ISL_568776, EPI_ISL_568777, EPI_ISL_568778, EPI_ISL_568779, EPI_ISL_568780, EPI_ISL_568781, EPI_ISL_568782, EPI_ISL_568783, EPI_ISL_568784, EPI_ISL_568785                                                                                                                                                                                                                                                                                                                                                                                                                                                                                                                                                                                                                                                                                                                                                                                                                                                                                                                                                                                                                                                                                                                                                                                                                                                                                                                                                                                                                                                                                                                                                                                                                                                                                                                                                                                                                                                                                                                                                                                                                                                                                                                                                                                                                                                                                                                                                                                                                                                                                                                                                                                                                                                                                                                                                                                                                                                                                                                                                                                                                                                                                                                                                                                                                                                                                                                                                                                                                                                                                                                                                                                                                                                                                                                                                 |           |                                                                                                                                                                                  |                                                                                                                                                                                 |                                                                                                                                                                                                                                                                                                                                                              |

|                                                                                                                                                                                                                                                                                                                                                                                                                                                                                                                                                                                                                                                                                                                                                                                                                                                                                                                                                                                                                                                                                                                                                                                                                                                                                                                                                                                                                                                                                                                                                                                                                                                                                                                                                                                                                                                                                                                                                                                                                                                                                                                                                                                                                                                                                                                                                                                                                                                                                                                                                                                                                                                                                                                                                                                                                                                                                                                                                                                                                                                                                                                                                                                                                                                                                                                                                                                                                                                                                                                                                                                                                                                                                                                                                                                                                                                                                                                                                                                                                                                                                                                                                                                                                                                                                                                                                                                                                                                                                                                                                                                                                                                                                                                                                                                                                                                                                                                                                                                |                                                                                                                              |                                                                                                                              |                                                                                                                                                                                                                                                                                                                                                                                     |
|--------------------------------------------------------------------------------------------------------------------------------------------------------------------------------------------------------------------------------------------------------------------------------------------------------------------------------------------------------------------------------------------------------------------------------------------------------------------------------------------------------------------------------------------------------------------------------------------------------------------------------------------------------------------------------------------------------------------------------------------------------------------------------------------------------------------------------------------------------------------------------------------------------------------------------------------------------------------------------------------------------------------------------------------------------------------------------------------------------------------------------------------------------------------------------------------------------------------------------------------------------------------------------------------------------------------------------------------------------------------------------------------------------------------------------------------------------------------------------------------------------------------------------------------------------------------------------------------------------------------------------------------------------------------------------------------------------------------------------------------------------------------------------------------------------------------------------------------------------------------------------------------------------------------------------------------------------------------------------------------------------------------------------------------------------------------------------------------------------------------------------------------------------------------------------------------------------------------------------------------------------------------------------------------------------------------------------------------------------------------------------------------------------------------------------------------------------------------------------------------------------------------------------------------------------------------------------------------------------------------------------------------------------------------------------------------------------------------------------------------------------------------------------------------------------------------------------------------------------------------------------------------------------------------------------------------------------------------------------------------------------------------------------------------------------------------------------------------------------------------------------------------------------------------------------------------------------------------------------------------------------------------------------------------------------------------------------------------------------------------------------------------------------------------------------------------------------------------------------------------------------------------------------------------------------------------------------------------------------------------------------------------------------------------------------------------------------------------------------------------------------------------------------------------------------------------------------------------------------------------------------------------------------------------------------------------------------------------------------------------------------------------------------------------------------------------------------------------------------------------------------------------------------------------------------------------------------------------------------------------------------------------------------------------------------------------------------------------------------------------------------------------------------------------------------------------------------------------------------------------------------------------------------------------------------------------------------------------------------------------------------------------------------------------------------------------------------------------------------------------------------------------------------------------------------------------------------------------------------------------------------------------------------------------------------------------------------------------------------|------------------------------------------------------------------------------------------------------------------------------|------------------------------------------------------------------------------------------------------------------------------|-------------------------------------------------------------------------------------------------------------------------------------------------------------------------------------------------------------------------------------------------------------------------------------------------------------------------------------------------------------------------------------|
| EPI_ISL_576371, EPI_ISL_576372, EPI_ISL_576373                                                                                                                                                                                                                                                                                                                                                                                                                                                                                                                                                                                                                                                                                                                                                                                                                                                                                                                                                                                                                                                                                                                                                                                                                                                                                                                                                                                                                                                                                                                                                                                                                                                                                                                                                                                                                                                                                                                                                                                                                                                                                                                                                                                                                                                                                                                                                                                                                                                                                                                                                                                                                                                                                                                                                                                                                                                                                                                                                                                                                                                                                                                                                                                                                                                                                                                                                                                                                                                                                                                                                                                                                                                                                                                                                                                                                                                                                                                                                                                                                                                                                                                                                                                                                                                                                                                                                                                                                                                                                                                                                                                                                                                                                                                                                                                                                                                                                                                                 | Cancer Biology Department, National Cancer Institute                                                                         | Cancer Biology Department, National Cancer Institute                                                                         | Zekri,A.N., Soliman,H.K., Ahmed,O.S., Hafez,M.M., Hamdy,M.S., Abouelhoda,M.                                                                                                                                                                                                                                                                                                         |
| EPI_ISL_581455, EPI_ISL_581462, EPI_ISL_581472, EPI_ISL_581486, EPI_ISL_581487, EPI_ISL_581488, EPI_ISL_581489, EPI_ISL_581490, EPI_ISL_581491, EPI_ISL_581492, EPI_ISL_581493                                                                                                                                                                                                                                                                                                                                                                                                                                                                                                                                                                                                                                                                                                                                                                                                                                                                                                                                                                                                                                                                                                                                                                                                                                                                                                                                                                                                                                                                                                                                                                                                                                                                                                                                                                                                                                                                                                                                                                                                                                                                                                                                                                                                                                                                                                                                                                                                                                                                                                                                                                                                                                                                                                                                                                                                                                                                                                                                                                                                                                                                                                                                                                                                                                                                                                                                                                                                                                                                                                                                                                                                                                                                                                                                                                                                                                                                                                                                                                                                                                                                                                                                                                                                                                                                                                                                                                                                                                                                                                                                                                                                                                                                                                                                                                                                 |                                                                                                                              |                                                                                                                              |                                                                                                                                                                                                                                                                                                                                                                                     |
| see above                                                                                                                                                                                                                                                                                                                                                                                                                                                                                                                                                                                                                                                                                                                                                                                                                                                                                                                                                                                                                                                                                                                                                                                                                                                                                                                                                                                                                                                                                                                                                                                                                                                                                                                                                                                                                                                                                                                                                                                                                                                                                                                                                                                                                                                                                                                                                                                                                                                                                                                                                                                                                                                                                                                                                                                                                                                                                                                                                                                                                                                                                                                                                                                                                                                                                                                                                                                                                                                                                                                                                                                                                                                                                                                                                                                                                                                                                                                                                                                                                                                                                                                                                                                                                                                                                                                                                                                                                                                                                                                                                                                                                                                                                                                                                                                                                                                                                                                                                                      | Fondation Congolaise pour la recherche medicale (FCRM)                                                                       | NGS Competence Center Tübingen, Institut für Medizinische Mikrobiologie und Hygiene, Universitätsklinikum Tübingen           | Angel Angelov                                                                                                                                                                                                                                                                                                                                                                       |
| EPI_ISL_591083, EPI_ISL_591084, EPI_ISL_591085, EPI_ISL_591086, EPI_ISL_591087, EPI_ISL_591088, EPI_ISL_591089                                                                                                                                                                                                                                                                                                                                                                                                                                                                                                                                                                                                                                                                                                                                                                                                                                                                                                                                                                                                                                                                                                                                                                                                                                                                                                                                                                                                                                                                                                                                                                                                                                                                                                                                                                                                                                                                                                                                                                                                                                                                                                                                                                                                                                                                                                                                                                                                                                                                                                                                                                                                                                                                                                                                                                                                                                                                                                                                                                                                                                                                                                                                                                                                                                                                                                                                                                                                                                                                                                                                                                                                                                                                                                                                                                                                                                                                                                                                                                                                                                                                                                                                                                                                                                                                                                                                                                                                                                                                                                                                                                                                                                                                                                                                                                                                                                                                 | Viral Respiratory Lab, National Institute for Biomedical Research (INRB)                                                     | Pathogen Sequencing Lab, National Institute for Biomedical Research (INRB)                                                   | Placide Mbala-Kingebeni, Edith Nkwembe, Eddy Kinganda-Lusamaki, Amuri Aziza, Francisca Muyembe Mawete, Emmanuel Lokilo Lofiko, Jean Claude Makangara, Catherine Pratt, Matthias Pauthner, Josh Quick, Allison Black, James Hadfield, Trevor Bedford, Ian Goodfellow, Andrew Rambaut, Nick Loman, Kristian Andersen, Michael Wiley, Steve Ahuka-Mundeke, Jean-Jacques Muyembe Tamfum |
| EPI_ISL_602622                                                                                                                                                                                                                                                                                                                                                                                                                                                                                                                                                                                                                                                                                                                                                                                                                                                                                                                                                                                                                                                                                                                                                                                                                                                                                                                                                                                                                                                                                                                                                                                                                                                                                                                                                                                                                                                                                                                                                                                                                                                                                                                                                                                                                                                                                                                                                                                                                                                                                                                                                                                                                                                                                                                                                                                                                                                                                                                                                                                                                                                                                                                                                                                                                                                                                                                                                                                                                                                                                                                                                                                                                                                                                                                                                                                                                                                                                                                                                                                                                                                                                                                                                                                                                                                                                                                                                                                                                                                                                                                                                                                                                                                                                                                                                                                                                                                                                                                                                                 | AHRI-Sigal                                                                                                                   | KRISP, KZN Research Innovation and Sequencing Platform                                                                       | Gazy I, Sigla, Karim F, Cele S, Giandhari J, Pillay S, Tegally H, Wilkinson E, de Oliveira T                                                                                                                                                                                                                                                                                        |
| EPI_ISL_602623, EPI_ISL_602624, EPI_ISL_602625, EPI_ISL_602626, EPI_ISL_602627, EPI_ISL_602628, EPI_ISL_602629, EPI_ISL_602630, EPI_ISL_602631                                                                                                                                                                                                                                                                                                                                                                                                                                                                                                                                                                                                                                                                                                                                                                                                                                                                                                                                                                                                                                                                                                                                                                                                                                                                                                                                                                                                                                                                                                                                                                                                                                                                                                                                                                                                                                                                                                                                                                                                                                                                                                                                                                                                                                                                                                                                                                                                                                                                                                                                                                                                                                                                                                                                                                                                                                                                                                                                                                                                                                                                                                                                                                                                                                                                                                                                                                                                                                                                                                                                                                                                                                                                                                                                                                                                                                                                                                                                                                                                                                                                                                                                                                                                                                                                                                                                                                                                                                                                                                                                                                                                                                                                                                                                                                                                                                 | AHRI-Sigal                                                                                                                   | KRISP, KZN Research Innovation and Sequencing Platform                                                                       | Gazy I, Sigl A, Karim F, Cele S, Giandhari J, Pillay S, Tegally H, Wilkinson E, de Oliveira T                                                                                                                                                                                                                                                                                       |
| EPI_ISL_602632, EPI_ISL_602633, EPI_ISL_602634, EPI_ISL_602635, EPI_ISL_602636, EPI_ISL_602637, EPI_ISL_602638, EPI_ISL_602639, EPI_ISL_602640, EPI_ISL_602641, EPI_ISL_602642, EPI_ISL_602643, EPI_ISL_602644, EPI_ISL_602645, EPI_ISL_602646, EPI_ISL_602647, EPI_ISL_602648, EPI_ISL_602649, EPI_ISL_602650, EPI_ISL_602651, EPI_ISL_602652, EPI_ISL_602653, EPI_ISL_602654, EPI_ISL_602655, EPI_ISL_602656, EPI_ISL_602657, EPI_ISL_602658, EPI_ISL_602659, EPI_ISL_602660, EPI_ISL_602661, EPI_ISL_602662, EPI_ISL_602663, EPI_ISL_602664, EPI_ISL_602665, EPI_ISL_602666, EPI_ISL_602667, EPI_ISL_602668, EPI_ISL_602669, EPI_ISL_602670, EPI_ISL_602671, EPI_ISL_602672, EPI_ISL_602673, EPI_ISL_602674, EPI_ISL_602675, EPI_ISL_602676, EPI_ISL_602677, EPI_ISL_602678, EPI_ISL_602679, EPI_ISL_602680, EPI_ISL_602681, EPI_ISL_602682, EPI_ISL_602683, EPI_ISL_602684, EPI_ISL_602685, EPI_ISL_602686, EPI_ISL_602687, EPI_ISL_602688, EPI_ISL_602689, EPI_ISL_602690, EPI_ISL_602691, EPI_ISL_602692, EPI_ISL_602693, EPI_ISL_602694, EPI_ISL_602695, EPI_ISL_602696, EPI_ISL_602697, EPI_ISL_602698, EPI_ISL_602699, EPI_ISL_602700, EPI_ISL_602701, EPI_ISL_602702, EPI_ISL_602703, EPI_ISL_602704, EPI_ISL_602705, EPI_ISL_602706, EPI_ISL_602707, EPI_ISL_602708, EPI_ISL_602709, EPI_ISL_602710, EPI_ISL_602711, EPI_ISL_602712, EPI_ISL_602713, EPI_ISL_602714, EPI_ISL_602715, EPI_ISL_602716, EPI_ISL_602717, EPI_ISL_602718, EPI_ISL_602719, EPI_ISL_602720, EPI_ISL_602721, EPI_ISL_602722, EPI_ISL_602723, EPI_ISL_602724, EPI_ISL_602725, EPI_ISL_602726, EPI_ISL_602727, EPI_ISL_602728, EPI_ISL_602729, EPI_ISL_602730, EPI_ISL_602731, EPI_ISL_602732, EPI_ISL_602733, EPI_ISL_602734, EPI_ISL_602735, EPI_ISL_602736, EPI_ISL_602737, EPI_ISL_602738, EPI_ISL_602739, EPI_ISL_602740, EPI_ISL_602741, EPI_ISL_602742, EPI_ISL_602743, EPI_ISL_602744, EPI_ISL_602745, EPI_ISL_602746, EPI_ISL_602747, EPI_ISL_602748, EPI_ISL_602749, EPI_ISL_602750, EPI_ISL_602751, EPI_ISL_602752, EPI_ISL_602753, EPI_ISL_602754, EPI_ISL_602755, EPI_ISL_602756, EPI_ISL_602757, EPI_ISL_602758, EPI_ISL_602759, EPI_ISL_602760, EPI_ISL_602761, EPI_ISL_602762, EPI_ISL_602763, EPI_ISL_602764, EPI_ISL_602765, EPI_ISL_602766, EPI_ISL_602767, EPI_ISL_602768, EPI_ISL_602769, EPI_ISL_602770, EPI_ISL_602771, EPI_ISL_602772, EPI_ISL_602773, EPI_ISL_602774, EPI_ISL_602775, EPI_ISL_602776, EPI_ISL_602777, EPI_ISL_602778, EPI_ISL_602779, EPI_ISL_602780, EPI_ISL_602781, EPI_ISL_602782, EPI_ISL_602783, EPI_ISL_602784, EPI_ISL_602785, EPI_ISL_602786, EPI_ISL_602787, EPI_ISL_602788, EPI_ISL_602789, EPI_ISL_602790, EPI_ISL_602791, EPI_ISL_602792, EPI_ISL_602793, EPI_ISL_602794, EPI_ISL_602795, EPI_ISL_602796, EPI_ISL_602797, EPI_ISL_602798, EPI_ISL_602799, EPI_ISL_602800, EPI_ISL_602801, EPI_ISL_602802, EPI_ISL_602803, EPI_ISL_602804, EPI_ISL_602805, EPI_ISL_602806, EPI_ISL_602807, EPI_ISL_602808, EPI_ISL_602809, EPI_ISL_602810, EPI_ISL_602811, EPI_ISL_602812, EPI_ISL_602813, EPI_ISL_602814, EPI_ISL_602815, EPI_ISL_602816, EPI_ISL_602817, EPI_ISL_602818, EPI_ISL_602819, EPI_ISL_602820, EPI_ISL_602821, EPI_ISL_602822, EPI_ISL_602823, EPI_ISL_602824, EPI_ISL_602825, EPI_ISL_602826, EPI_ISL_602827, EPI_ISL_602828, EPI_ISL_602829, EPI_ISL_602830, EPI_ISL_602831, EPI_ISL_602832, EPI_ISL_602833, EPI_ISL_602834, EPI_ISL_602835, EPI_ISL_602836, EPI_ISL_602837, EPI_ISL_602838, EPI_ISL_602839, EPI_ISL_602840, EPI_ISL_602841, EPI_ISL_602842, EPI_ISL_602843, EPI_ISL_602844, EPI_ISL_602845, EPI_ISL_602846, EPI_ISL_602847, EPI_ISL_602848, EPI_ISL_602849, EPI_ISL_602850, EPI_ISL_602851, EPI_ISL_602852, EPI_ISL_602853, EPI_ISL_602854, EPI_ISL_602855, EPI_ISL_602856, EPI_ISL_602857, EPI_ISL_602858, EPI_ISL_602859, EPI_ISL_602860, EPI_ISL_602861, EPI_ISL_602862, EPI_ISL_602863, EPI_ISL_602864, EPI_ISL_602865, EPI_ISL_602866, EPI_ISL_602867, EPI_ISL_602868, EPI_ISL_602869, EPI_ISL_602870, EPI_ISL_602871, EPI_ISL_602872, EPI_ISL_602873, EPI_ISL_602874, EPI_ISL_602875, EPI_ISL_602876, EPI_ISL_602877, EPI_ISL_602878, EPI_ISL_602879, EPI_ISL_602880, EPI_ISL_602881, EPI_ISL_602882, EPI_ISL_602883, EPI_ISL_602884, EPI_ISL_602885, EPI_ISL_602886, EPI_ISL_602887, EPI_ISL_602888, EPI_ISL_602889, EPI_ISL_602890, EPI_ISL_602891, EPI_ISL_602892, EPI_ISL_602893, EPI_ISL_602894, EPI_ISL_602895, EPI_ISL_602896, EPI_ISL_602897, EPI_ISL_602898, EPI_ISL_602899, EPI_ISL_602900, EPI_ISL_602901, EPI_ISL_602902, EPI_ISL_602903, EPI_ISL_602904, EPI_ISL_602905, EPI_ISL_602906, EPI_ISL_602907, EPI_ISL_602908, EPI_ISL_602909, EPI_ISL_602910, EPI_ISL_602911, EPI_ISL_602912, EPI_ISL_602913, EPI_ISL_602914, EPI_ISL_602915, EPI_ISL_602916, EPI_ISL_602917, EPI_ISL_602918, EPI_ISL_602919, EPI_ISL_602920, EPI_ISL_602921, EPI_ISL_602922, EPI_ISL_602923, EPI_ISL_602924, EPI_ISL_602925, EPI_ISL_602926, EPI_ISL_602927, EPI_ISL_602928, EPI_ISL_602929, EPI_ISL_602930 |                                                                                                                              |                                                                                                                              |                                                                                                                                                                                                                                                                                                                                                                                     |
| see above                                                                                                                                                                                                                                                                                                                                                                                                                                                                                                                                                                                                                                                                                                                                                                                                                                                                                                                                                                                                                                                                                                                                                                                                                                                                                                                                                                                                                                                                                                                                                                                                                                                                                                                                                                                                                                                                                                                                                                                                                                                                                                                                                                                                                                                                                                                                                                                                                                                                                                                                                                                                                                                                                                                                                                                                                                                                                                                                                                                                                                                                                                                                                                                                                                                                                                                                                                                                                                                                                                                                                                                                                                                                                                                                                                                                                                                                                                                                                                                                                                                                                                                                                                                                                                                                                                                                                                                                                                                                                                                                                                                                                                                                                                                                                                                                                                                                                                                                                                      | NHLS-IALCH                                                                                                                   | KRISP, KZN Research Innovation and Sequencing Platform                                                                       | Giandhari J, Pillay S, Lessells R, Mdlalose K, York D, Khan S, Tegally H, Wilkinson E, de Oliveira T                                                                                                                                                                                                                                                                                |
| EPI_ISL_605780, EPI_ISL_605781, EPI_ISL_605782                                                                                                                                                                                                                                                                                                                                                                                                                                                                                                                                                                                                                                                                                                                                                                                                                                                                                                                                                                                                                                                                                                                                                                                                                                                                                                                                                                                                                                                                                                                                                                                                                                                                                                                                                                                                                                                                                                                                                                                                                                                                                                                                                                                                                                                                                                                                                                                                                                                                                                                                                                                                                                                                                                                                                                                                                                                                                                                                                                                                                                                                                                                                                                                                                                                                                                                                                                                                                                                                                                                                                                                                                                                                                                                                                                                                                                                                                                                                                                                                                                                                                                                                                                                                                                                                                                                                                                                                                                                                                                                                                                                                                                                                                                                                                                                                                                                                                                                                 | CEIRS Data Processing and Coordinating Center, St. Jude Center of Excellence for Influenza Research and Surveillance (CEIRS) | CEIRS Data Processing and Coordinating Center, St. Jude Center of Excellence for Influenza Research and Surveillance (CEIRS) | Roshdy,W.H., Kayed,A.E., Naguib,A., Kamel,M.N., El-Taweel,A., El-Shesheny,R., Kandell,A., Mostafa,A., Shehata,M., Gomaa,M., Mahmoud,S.H., Moatasm,Y., Kutkat,O., Mahrous,N., El-Sayes,M., Showky,S., El-Guindy,N.M., Webby,R., Kayali,G., Ali,M.A.                                                                                                                                  |
| EPI_ISL_605784                                                                                                                                                                                                                                                                                                                                                                                                                                                                                                                                                                                                                                                                                                                                                                                                                                                                                                                                                                                                                                                                                                                                                                                                                                                                                                                                                                                                                                                                                                                                                                                                                                                                                                                                                                                                                                                                                                                                                                                                                                                                                                                                                                                                                                                                                                                                                                                                                                                                                                                                                                                                                                                                                                                                                                                                                                                                                                                                                                                                                                                                                                                                                                                                                                                                                                                                                                                                                                                                                                                                                                                                                                                                                                                                                                                                                                                                                                                                                                                                                                                                                                                                                                                                                                                                                                                                                                                                                                                                                                                                                                                                                                                                                                                                                                                                                                                                                                                                                                 | AHRI-Sigal                                                                                                                   | KRISP, KZN Research Innovation and Sequencing Platform                                                                       | Gazy I, Sigal A, Karim F, Cele S, Giandhari J, Pillay S, Tegally H, Wilkinson E, de Oliveira T                                                                                                                                                                                                                                                                                      |
| EPI_ISL_605785, EPI_ISL_605786, EPI_ISL_605787, EPI_ISL_605788, EPI_ISL_605789, EPI_ISL_605790                                                                                                                                                                                                                                                                                                                                                                                                                                                                                                                                                                                                                                                                                                                                                                                                                                                                                                                                                                                                                                                                                                                                                                                                                                                                                                                                                                                                                                                                                                                                                                                                                                                                                                                                                                                                                                                                                                                                                                                                                                                                                                                                                                                                                                                                                                                                                                                                                                                                                                                                                                                                                                                                                                                                                                                                                                                                                                                                                                                                                                                                                                                                                                                                                                                                                                                                                                                                                                                                                                                                                                                                                                                                                                                                                                                                                                                                                                                                                                                                                                                                                                                                                                                                                                                                                                                                                                                                                                                                                                                                                                                                                                                                                                                                                                                                                                                                                 | NHLS-IALCH                                                                                                                   | KRISP, KZN Research Innovation and Sequencing Platform                                                                       | Giandhari J, Pillay S, Lessells R, Mdlalose K, York D, Khan S, Tegally H, Wilkinson E, de Oliveira T                                                                                                                                                                                                                                                                                |
| EPI_ISL_605924, EPI_ISL_605925, EPI_ISL_605926, EPI_ISL_605927, EPI_ISL_605928                                                                                                                                                                                                                                                                                                                                                                                                                                                                                                                                                                                                                                                                                                                                                                                                                                                                                                                                                                                                                                                                                                                                                                                                                                                                                                                                                                                                                                                                                                                                                                                                                                                                                                                                                                                                                                                                                                                                                                                                                                                                                                                                                                                                                                                                                                                                                                                                                                                                                                                                                                                                                                                                                                                                                                                                                                                                                                                                                                                                                                                                                                                                                                                                                                                                                                                                                                                                                                                                                                                                                                                                                                                                                                                                                                                                                                                                                                                                                                                                                                                                                                                                                                                                                                                                                                                                                                                                                                                                                                                                                                                                                                                                                                                                                                                                                                                                                                 | Emergence des Maladies Virales, Centre Interdisciplinaire de Recherches Medicales de Franceville                             | Emergence des Maladies Virales, Centre Interdisciplinaire de Recherches Medicales de Franceville                             | Lekana-Douki,S.E., N'dilimbaka,N., Mbongo kama,E., Kandet Yattara,M., Mints Ndong,A., Ngonga Dikongo,A.M., Andeko,J.C., Zong Minko,O., Lekana-Douki,J.-B.                                                                                                                                                                                                                           |
| EPI_ISL_614347, EPI_ISL_614348, EPI_ISL_614349, EPI_ISL_614350, EPI_ISL_614351, EPI_ISL_614352, EPI_ISL_614353, EPI_ISL_614354, EPI_ISL_614355, EPI_ISL_614356, EPI_ISL_614357, EPI_ISL_614358, EPI_ISL_614359, EPI_ISL_614360, EPI_ISL_614361, EPI_ISL_614362, EPI_ISL_614363, EPI_ISL_614364, EPI_ISL_614365, EPI_ISL_614366, EPI_ISL_614367, EPI_ISL_614368, EPI_ISL_614369, EPI_ISL_614370, EPI_ISL_614371, EPI_ISL_614372, EPI_ISL_614373, EPI_ISL_614374, EPI_ISL_614375, EPI_ISL_614376, EPI_ISL_614377, EPI_ISL_614378, EPI_ISL_614379, EPI_ISL_614380, EPI_ISL_614381, EPI_ISL_614382, EPI_ISL_614383, EPI_ISL_614384, EPI_ISL_614385, EPI_ISL_614386, EPI_ISL_614387, EPI_ISL_614388, EPI_ISL_614389, EPI_ISL_614390, EPI_ISL_614391, EPI_ISL_614392, EPI_ISL_614393, EPI_ISL_614394, EPI_ISL_614395                                                                                                                                                                                                                                                                                                                                                                                                                                                                                                                                                                                                                                                                                                                                                                                                                                                                                                                                                                                                                                                                                                                                                                                                                                                                                                                                                                                                                                                                                                                                                                                                                                                                                                                                                                                                                                                                                                                                                                                                                                                                                                                                                                                                                                                                                                                                                                                                                                                                                                                                                                                                                                                                                                                                                                                                                                                                                                                                                                                                                                                                                                                                                                                                                                                                                                                                                                                                                                                                                                                                                                                                                                                                                                                                                                                                                                                                                                                                                                                                                                                                                                                                                                 |                                                                                                                              |                                                                                                                              |                                                                                                                                                                                                                                                                                                                                                                                     |
| see above                                                                                                                                                                                                                                                                                                                                                                                                                                                                                                                                                                                                                                                                                                                                                                                                                                                                                                                                                                                                                                                                                                                                                                                                                                                                                                                                                                                                                                                                                                                                                                                                                                                                                                                                                                                                                                                                                                                                                                                                                                                                                                                                                                                                                                                                                                                                                                                                                                                                                                                                                                                                                                                                                                                                                                                                                                                                                                                                                                                                                                                                                                                                                                                                                                                                                                                                                                                                                                                                                                                                                                                                                                                                                                                                                                                                                                                                                                                                                                                                                                                                                                                                                                                                                                                                                                                                                                                                                                                                                                                                                                                                                                                                                                                                                                                                                                                                                                                                                                      | Molecular diagnostic unit for viral haemorrhagic fevers and emerging viruses, Bouaké CHU Laboratory                          | Project group Epidemiology of Highly Pathogenic Microorganisms, Robert Koch-Institute                                        | Chantal Akoua-Koffi, Diané Bamourou, Etilé Aneh, Essia Belarbi, Safiatou Karidioula, Grit Schubert, Adjaratou Traoré, Soundélé Maité, Monemo Pacome, Coulibaly Mbegnan, Bamba Fatoumata Touré, Kra Ouffoué, Fabian Leendertz                                                                                                                                                        |
| EPI_ISL_614763                                                                                                                                                                                                                                                                                                                                                                                                                                                                                                                                                                                                                                                                                                                                                                                                                                                                                                                                                                                                                                                                                                                                                                                                                                                                                                                                                                                                                                                                                                                                                                                                                                                                                                                                                                                                                                                                                                                                                                                                                                                                                                                                                                                                                                                                                                                                                                                                                                                                                                                                                                                                                                                                                                                                                                                                                                                                                                                                                                                                                                                                                                                                                                                                                                                                                                                                                                                                                                                                                                                                                                                                                                                                                                                                                                                                                                                                                                                                                                                                                                                                                                                                                                                                                                                                                                                                                                                                                                                                                                                                                                                                                                                                                                                                                                                                                                                                                                                                                                 | Rwanda National Reference Laboratory                                                                                         | Rwanda National Reference Laboratory                                                                                         | Mukantwari Enatha,Stefan Rooke,Aine O'Toole,Umuringa Jeanne d'Arc                                                                                                                                                                                                                                                                                                                   |
| EPI_ISL_614891                                                                                                                                                                                                                                                                                                                                                                                                                                                                                                                                                                                                                                                                                                                                                                                                                                                                                                                                                                                                                                                                                                                                                                                                                                                                                                                                                                                                                                                                                                                                                                                                                                                                                                                                                                                                                                                                                                                                                                                                                                                                                                                                                                                                                                                                                                                                                                                                                                                                                                                                                                                                                                                                                                                                                                                                                                                                                                                                                                                                                                                                                                                                                                                                                                                                                                                                                                                                                                                                                                                                                                                                                                                                                                                                                                                                                                                                                                                                                                                                                                                                                                                                                                                                                                                                                                                                                                                                                                                                                                                                                                                                                                                                                                                                                                                                                                                                                                                                                                 | Rwanda National Reference Laboratory                                                                                         | Rwanda National Reference Laboratory                                                                                         | Mukantwari Enatha,Stefan Rooke,Aine O'Toole ,Umuringa Jeanne d'Arc                                                                                                                                                                                                                                                                                                                  |
| EPI_ISL_614892                                                                                                                                                                                                                                                                                                                                                                                                                                                                                                                                                                                                                                                                                                                                                                                                                                                                                                                                                                                                                                                                                                                                                                                                                                                                                                                                                                                                                                                                                                                                                                                                                                                                                                                                                                                                                                                                                                                                                                                                                                                                                                                                                                                                                                                                                                                                                                                                                                                                                                                                                                                                                                                                                                                                                                                                                                                                                                                                                                                                                                                                                                                                                                                                                                                                                                                                                                                                                                                                                                                                                                                                                                                                                                                                                                                                                                                                                                                                                                                                                                                                                                                                                                                                                                                                                                                                                                                                                                                                                                                                                                                                                                                                                                                                                                                                                                                                                                                                                                 | Rwanda National Reference Laboratory                                                                                         | Rwanda National Reference Laboratory                                                                                         | Mukantwari Enatha,Stefan Rooke,Aine O'Toole,Umuringa Jeanne d'Arc                                                                                                                                                                                                                                                                                                                   |
| EPI_ISL_614980                                                                                                                                                                                                                                                                                                                                                                                                                                                                                                                                                                                                                                                                                                                                                                                                                                                                                                                                                                                                                                                                                                                                                                                                                                                                                                                                                                                                                                                                                                                                                                                                                                                                                                                                                                                                                                                                                                                                                                                                                                                                                                                                                                                                                                                                                                                                                                                                                                                                                                                                                                                                                                                                                                                                                                                                                                                                                                                                                                                                                                                                                                                                                                                                                                                                                                                                                                                                                                                                                                                                                                                                                                                                                                                                                                                                                                                                                                                                                                                                                                                                                                                                                                                                                                                                                                                                                                                                                                                                                                                                                                                                                                                                                                                                                                                                                                                                                                                                                                 | Rwanda National Reference Laboratory                                                                                         | Rwanda National Reference Laboratory                                                                                         | MUKantwari Enatha,Stefan Rook,Aine O'Toole,Umuringa Jeanne d'Arc                                                                                                                                                                                                                                                                                                                    |
| EPI_ISL_615063, EPI_ISL_615064, EPI_ISL_615066, EPI_ISL_615067                                                                                                                                                                                                                                                                                                                                                                                                                                                                                                                                                                                                                                                                                                                                                                                                                                                                                                                                                                                                                                                                                                                                                                                                                                                                                                                                                                                                                                                                                                                                                                                                                                                                                                                                                                                                                                                                                                                                                                                                                                                                                                                                                                                                                                                                                                                                                                                                                                                                                                                                                                                                                                                                                                                                                                                                                                                                                                                                                                                                                                                                                                                                                                                                                                                                                                                                                                                                                                                                                                                                                                                                                                                                                                                                                                                                                                                                                                                                                                                                                                                                                                                                                                                                                                                                                                                                                                                                                                                                                                                                                                                                                                                                                                                                                                                                                                                                                                                 | Rwanda National Reference Laboratory                                                                                         | Rwanda National Reference Laboratory                                                                                         | Mukantwari Enatha,Stefan Rooke,Aine O'Toole,UMuringa Jeanne d'Arc                                                                                                                                                                                                                                                                                                                   |
| EPI_ISL_615069                                                                                                                                                                                                                                                                                                                                                                                                                                                                                                                                                                                                                                                                                                                                                                                                                                                                                                                                                                                                                                                                                                                                                                                                                                                                                                                                                                                                                                                                                                                                                                                                                                                                                                                                                                                                                                                                                                                                                                                                                                                                                                                                                                                                                                                                                                                                                                                                                                                                                                                                                                                                                                                                                                                                                                                                                                                                                                                                                                                                                                                                                                                                                                                                                                                                                                                                                                                                                                                                                                                                                                                                                                                                                                                                                                                                                                                                                                                                                                                                                                                                                                                                                                                                                                                                                                                                                                                                                                                                                                                                                                                                                                                                                                                                                                                                                                                                                                                                                                 | Rwanda National Reference Laboratory                                                                                         | Rwanda National Laboratory                                                                                                   | Mukantwari Enatha,Stefan Rooke,Aine O'Toole,Umuringa Jeanne d'Arc                                                                                                                                                                                                                                                                                                                   |
| EPI_ISL_615071                                                                                                                                                                                                                                                                                                                                                                                                                                                                                                                                                                                                                                                                                                                                                                                                                                                                                                                                                                                                                                                                                                                                                                                                                                                                                                                                                                                                                                                                                                                                                                                                                                                                                                                                                                                                                                                                                                                                                                                                                                                                                                                                                                                                                                                                                                                                                                                                                                                                                                                                                                                                                                                                                                                                                                                                                                                                                                                                                                                                                                                                                                                                                                                                                                                                                                                                                                                                                                                                                                                                                                                                                                                                                                                                                                                                                                                                                                                                                                                                                                                                                                                                                                                                                                                                                                                                                                                                                                                                                                                                                                                                                                                                                                                                                                                                                                                                                                                                                                 | Rwanda National Reference Laboratory                                                                                         | Rwanda National Reference Laboratory                                                                                         | MUKantwari Eanatha,Stefan Rook,Aine O'Toole,Umuringa Jeanne d'Arc                                                                                                                                                                                                                                                                                                                   |
| EPI_ISL_615074                                                                                                                                                                                                                                                                                                                                                                                                                                                                                                                                                                                                                                                                                                                                                                                                                                                                                                                                                                                                                                                                                                                                                                                                                                                                                                                                                                                                                                                                                                                                                                                                                                                                                                                                                                                                                                                                                                                                                                                                                                                                                                                                                                                                                                                                                                                                                                                                                                                                                                                                                                                                                                                                                                                                                                                                                                                                                                                                                                                                                                                                                                                                                                                                                                                                                                                                                                                                                                                                                                                                                                                                                                                                                                                                                                                                                                                                                                                                                                                                                                                                                                                                                                                                                                                                                                                                                                                                                                                                                                                                                                                                                                                                                                                                                                                                                                                                                                                                                                 | Rwanda National Reference Laboratory                                                                                         | Rwanda National Reference Laboratory                                                                                         | Mukantwari Enatha,Stefan Rooke,Aine O'Toole ,Umuringa Jeanne d'Arc                                                                                                                                                                                                                                                                                                                  |
| EPI_ISL_615075                                                                                                                                                                                                                                                                                                                                                                                                                                                                                                                                                                                                                                                                                                                                                                                                                                                                                                                                                                                                                                                                                                                                                                                                                                                                                                                                                                                                                                                                                                                                                                                                                                                                                                                                                                                                                                                                                                                                                                                                                                                                                                                                                                                                                                                                                                                                                                                                                                                                                                                                                                                                                                                                                                                                                                                                                                                                                                                                                                                                                                                                                                                                                                                                                                                                                                                                                                                                                                                                                                                                                                                                                                                                                                                                                                                                                                                                                                                                                                                                                                                                                                                                                                                                                                                                                                                                                                                                                                                                                                                                                                                                                                                                                                                                                                                                                                                                                                                                                                 | Rwanda National Reference Laboratory                                                                                         | Rwanda National Reference Laboratory                                                                                         | MUKantwari Enatha,Stefan Rooke,Aine O'Toole ,Umuringa Jeanne d'Arc                                                                                                                                                                                                                                                                                                                  |
| EPI_ISL_622894, EPI_ISL_622895, EPI_ISL_622896, EPI_ISL_622897, EPI_ISL_622898, EPI_ISL_622899, EPI_ISL_622900, EPI_ISL_622901, EPI_ISL_622902, EPI_ISL_622903, EPI_ISL_622904, EPI_ISL_622905, EPI_ISL_622906, EPI_ISL_622907, EPI_ISL_622908, EPI_ISL_622909, EPI_ISL_622910, EPI_ISL_622911, EPI_ISL_622912, EPI_ISL_622913, EPI_ISL_622914, EPI_ISL_622915, EPI_ISL_622916, EPI_ISL_622917, EPI_ISL_622918, EPI_ISL_622919, EPI_ISL_622920, EPI_ISL_622921, EPI_ISL_622922, EPI_ISL_622923, EPI_ISL_622924, EPI_ISL_622925, EPI_ISL_622926, EPI_ISL_622927, EPI_ISL_622928, EPI_ISL_622929, EPI_ISL_622930, EPI_ISL_622931, EPI_ISL_622932, EPI_ISL_622933, EPI_ISL_622934, EPI_ISL_622935, EPI_ISL_622936, EPI_ISL_622937, EPI_ISL_622938, EPI_ISL_622939, EPI_ISL_622940, EPI_ISL_622941                                                                                                                                                                                                                                                                                                                                                                                                                                                                                                                                                                                                                                                                                                                                                                                                                                                                                                                                                                                                                                                                                                                                                                                                                                                                                                                                                                                                                                                                                                                                                                                                                                                                                                                                                                                                                                                                                                                                                                                                                                                                                                                                                                                                                                                                                                                                                                                                                                                                                                                                                                                                                                                                                                                                                                                                                                                                                                                                                                                                                                                                                                                                                                                                                                                                                                                                                                                                                                                                                                                                                                                                                                                                                                                                                                                                                                                                                                                                                                                                                                                                                                                                                                                 |                                                                                                                              |                                                                                                                              | Allam M, Ismail A, Khumalo Z, Kwenda S, Mtshali P, Mnyameni F, Mohale T, Subramoney K, Bhiman JN                                                                                                                                                                                                                                                                                    |
| see above                                                                                                                                                                                                                                                                                                                                                                                                                                                                                                                                                                                                                                                                                                                                                                                                                                                                                                                                                                                                                                                                                                                                                                                                                                                                                                                                                                                                                                                                                                                                                                                                                                                                                                                                                                                                                                                                                                                                                                                                                                                                                                                                                                                                                                                                                                                                                                                                                                                                                                                                                                                                                                                                                                                                                                                                                                                                                                                                                                                                                                                                                                                                                                                                                                                                                                                                                                                                                                                                                                                                                                                                                                                                                                                                                                                                                                                                                                                                                                                                                                                                                                                                                                                                                                                                                                                                                                                                                                                                                                                                                                                                                                                                                                                                                                                                                                                                                                                                                                      | National Institute for Communicable Diseases of the National Health Laboratory Service                                       | National Institute for Communicable Diseases of the National Health Laboratory Service                                       | Allam M, Ismail A, Khumalo Z, Kwenda S, Mtshali P, Mnyameni F, Mohale T, Subramoney K, Bhiman JN                                                                                                                                                                                                                                                                                    |
| EPI_ISL_622942                                                                                                                                                                                                                                                                                                                                                                                                                                                                                                                                                                                                                                                                                                                                                                                                                                                                                                                                                                                                                                                                                                                                                                                                                                                                                                                                                                                                                                                                                                                                                                                                                                                                                                                                                                                                                                                                                                                                                                                                                                                                                                                                                                                                                                                                                                                                                                                                                                                                                                                                                                                                                                                                                                                                                                                                                                                                                                                                                                                                                                                                                                                                                                                                                                                                                                                                                                                                                                                                                                                                                                                                                                                                                                                                                                                                                                                                                                                                                                                                                                                                                                                                                                                                                                                                                                                                                                                                                                                                                                                                                                                                                                                                                                                                                                                                                                                                                                                                                                 | National Health Laboratory Service                                                                                           | National Institute for Communicable Diseases of the National Health Laboratory Service                                       | Allam M, Ismail A, Khumalo Z, Kwenda S, Mtshali P, Mnyameni F, Mohale T, Subramoney K, Bhiman JN                                                                                                                                                                                                                                                                                    |
| EPI_ISL_622943                                                                                                                                                                                                                                                                                                                                                                                                                                                                                                                                                                                                                                                                                                                                                                                                                                                                                                                                                                                                                                                                                                                                                                                                                                                                                                                                                                                                                                                                                                                                                                                                                                                                                                                                                                                                                                                                                                                                                                                                                                                                                                                                                                                                                                                                                                                                                                                                                                                                                                                                                                                                                                                                                                                                                                                                                                                                                                                                                                                                                                                                                                                                                                                                                                                                                                                                                                                                                                                                                                                                                                                                                                                                                                                                                                                                                                                                                                                                                                                                                                                                                                                                                                                                                                                                                                                                                                                                                                                                                                                                                                                                                                                                                                                                                                                                                                                                                                                                                                 | Lancet Laboratories                                                                                                          | National Institute for Communicable Diseases of the National Health Laboratory Service                                       | Allam M, Ismail A, Khumalo Z, Kwenda S, Mtshali P, Mnyameni F, Mohale T, Subramoney K, Bhiman JN                                                                                                                                                                                                                                                                                    |
| EPI_ISL_622944, EPI_ISL_622945                                                                                                                                                                                                                                                                                                                                                                                                                                                                                                                                                                                                                                                                                                                                                                                                                                                                                                                                                                                                                                                                                                                                                                                                                                                                                                                                                                                                                                                                                                                                                                                                                                                                                                                                                                                                                                                                                                                                                                                                                                                                                                                                                                                                                                                                                                                                                                                                                                                                                                                                                                                                                                                                                                                                                                                                                                                                                                                                                                                                                                                                                                                                                                                                                                                                                                                                                                                                                                                                                                                                                                                                                                                                                                                                                                                                                                                                                                                                                                                                                                                                                                                                                                                                                                                                                                                                                                                                                                                                                                                                                                                                                                                                                                                                                                                                                                                                                                                                                 | National Health Laboratory Service                                                                                           | National Institute for Communicable Diseases of the National Health Laboratory Service                                       | Allam M, Ismail A, Khumalo Z, Kwenda S, Mtshali P, Mnyameni F, Mohale T, Subramoney K, Bhiman JN                                                                                                                                                                                                                                                                                    |
| EPI_ISL_622946, EPI_ISL_622947, EPI_ISL_622948, EPI_ISL_622949, EPI_ISL_622950, EPI_ISL_622951, EPI_ISL_622952, EPI_ISL_622953                                                                                                                                                                                                                                                                                                                                                                                                                                                                                                                                                                                                                                                                                                                                                                                                                                                                                                                                                                                                                                                                                                                                                                                                                                                                                                                                                                                                                                                                                                                                                                                                                                                                                                                                                                                                                                                                                                                                                                                                                                                                                                                                                                                                                                                                                                                                                                                                                                                                                                                                                                                                                                                                                                                                                                                                                                                                                                                                                                                                                                                                                                                                                                                                                                                                                                                                                                                                                                                                                                                                                                                                                                                                                                                                                                                                                                                                                                                                                                                                                                                                                                                                                                                                                                                                                                                                                                                                                                                                                                                                                                                                                                                                                                                                                                                                                                                 | Lancet Laboratories                                                                                                          | National Institute for Communicable Diseases of the National Health Laboratory Service                                       | Allam M, Ismail A, Khumalo Z, Kwenda S, Mtshali P, Mnyameni F, Mohale T, Subramoney K, Bhiman JN                                                                                                                                                                                                                                                                                    |

|                                                                                                                                                                                                                                                                                                                                                                                                                                                                                                                                                                                                                                                                                                                                                                                                                                                                                                                                                                                                                                                                                                                |                                                                                                                                                                       |                                                                                                                                                                                                                                                                                                                                                                          |                                                                                                                                                                                                                                                               |                                                                                                      |
|----------------------------------------------------------------------------------------------------------------------------------------------------------------------------------------------------------------------------------------------------------------------------------------------------------------------------------------------------------------------------------------------------------------------------------------------------------------------------------------------------------------------------------------------------------------------------------------------------------------------------------------------------------------------------------------------------------------------------------------------------------------------------------------------------------------------------------------------------------------------------------------------------------------------------------------------------------------------------------------------------------------------------------------------------------------------------------------------------------------|-----------------------------------------------------------------------------------------------------------------------------------------------------------------------|--------------------------------------------------------------------------------------------------------------------------------------------------------------------------------------------------------------------------------------------------------------------------------------------------------------------------------------------------------------------------|---------------------------------------------------------------------------------------------------------------------------------------------------------------------------------------------------------------------------------------------------------------|------------------------------------------------------------------------------------------------------|
| EPI_ISL_622954                                                                                                                                                                                                                                                                                                                                                                                                                                                                                                                                                                                                                                                                                                                                                                                                                                                                                                                                                                                                                                                                                                 | National Health Laboratory Service                                                                                                                                    | National Institute for Communicable Diseases of the National Health Laboratory Service                                                                                                                                                                                                                                                                                   | Allam M, Ismail A, Khumalo Z, Kwenda S, Mtshali P, Mnyameni F, Mohale T, Subramoney K, Bhiman JN                                                                                                                                                              |                                                                                                      |
| EPI_ISL_622955, EPI_ISL_622957                                                                                                                                                                                                                                                                                                                                                                                                                                                                                                                                                                                                                                                                                                                                                                                                                                                                                                                                                                                                                                                                                 | Lancet Laboratories                                                                                                                                                   | National Institute for Communicable Diseases of the National Health Laboratory Service                                                                                                                                                                                                                                                                                   | Allam M, Ismail A, Khumalo Z, Kwenda S, Mtshali P, Mnyameni F, Mohale T, Subramoney K, Bhiman JN                                                                                                                                                              |                                                                                                      |
| EPI_ISL_622958                                                                                                                                                                                                                                                                                                                                                                                                                                                                                                                                                                                                                                                                                                                                                                                                                                                                                                                                                                                                                                                                                                 | National Health Laboratory Service                                                                                                                                    | National Institute for Communicable Diseases of the National Health Laboratory Service                                                                                                                                                                                                                                                                                   | Allam M, Ismail A, Khumalo Z, Kwenda S, Mtshali P, Mnyameni F, Mohale T, Subramoney K, Bhiman JN                                                                                                                                                              |                                                                                                      |
| EPI_ISL_622959, EPI_ISL_622960, EPI_ISL_622961, EPI_ISL_622962, EPI_ISL_622963, EPI_ISL_622964, EPI_ISL_622965, EPI_ISL_622966, EPI_ISL_622967, EPI_ISL_622968, EPI_ISL_622969                                                                                                                                                                                                                                                                                                                                                                                                                                                                                                                                                                                                                                                                                                                                                                                                                                                                                                                                 | see above                                                                                                                                                             | Lancet Laboratories                                                                                                                                                                                                                                                                                                                                                      | National Institute for Communicable Diseases of the National Health Laboratory Service                                                                                                                                                                        | Allam M, Ismail A, Khumalo Z, Kwenda S, Mtshali P, Mnyameni F, Mohale T, Subramoney K, Bhiman JN     |
| EPI_ISL_622970, EPI_ISL_622971, EPI_ISL_622972, EPI_ISL_622973, EPI_ISL_622974, EPI_ISL_622975, EPI_ISL_622976, EPI_ISL_622977                                                                                                                                                                                                                                                                                                                                                                                                                                                                                                                                                                                                                                                                                                                                                                                                                                                                                                                                                                                 | National Health Laboratory Service                                                                                                                                    | National Institute for Communicable Diseases of the National Health Laboratory Service                                                                                                                                                                                                                                                                                   | Allam M, Ismail A, Khumalo Z, Kwenda S, Mtshali P, Mnyameni F, Mohale T, Subramoney K, Bhiman JN                                                                                                                                                              |                                                                                                      |
| EPI_ISL_622978                                                                                                                                                                                                                                                                                                                                                                                                                                                                                                                                                                                                                                                                                                                                                                                                                                                                                                                                                                                                                                                                                                 | Lancet Laboratories                                                                                                                                                   | National Institute for Communicable Diseases of the National Health Laboratory Service                                                                                                                                                                                                                                                                                   | Allam M, Ismail A, Khumalo Z, Kwenda S, Mtshali P, Mnyameni F, Mohale T, Subramoney K, Bhiman JN                                                                                                                                                              |                                                                                                      |
| EPI_ISL_622979, EPI_ISL_622980, EPI_ISL_622981, EPI_ISL_622982                                                                                                                                                                                                                                                                                                                                                                                                                                                                                                                                                                                                                                                                                                                                                                                                                                                                                                                                                                                                                                                 | National Health Laboratory Service                                                                                                                                    | National Institute for Communicable Diseases of the National Health Laboratory Service                                                                                                                                                                                                                                                                                   | Allam M, Ismail A, Khumalo Z, Kwenda S, Mtshali P, Mnyameni F, Mohale T, Subramoney K, Bhiman JN                                                                                                                                                              |                                                                                                      |
| EPI_ISL_622983                                                                                                                                                                                                                                                                                                                                                                                                                                                                                                                                                                                                                                                                                                                                                                                                                                                                                                                                                                                                                                                                                                 | Lancet Laboratories                                                                                                                                                   | National Institute for Communicable Diseases of the National Health Laboratory Service                                                                                                                                                                                                                                                                                   | Allam M, Ismail A, Khumalo Z, Kwenda S, Mtshali P, Mnyameni F, Mohale T, Subramoney K, Bhiman JN                                                                                                                                                              |                                                                                                      |
| EPI_ISL_622984                                                                                                                                                                                                                                                                                                                                                                                                                                                                                                                                                                                                                                                                                                                                                                                                                                                                                                                                                                                                                                                                                                 | National Health Laboratory Service                                                                                                                                    | National Institute for Communicable Diseases of the National Health Laboratory Service                                                                                                                                                                                                                                                                                   | Allam M, Ismail A, Khumalo Z, Kwenda S, Mtshali P, Mnyameni F, Mohale T, Subramoney K, Bhiman JN                                                                                                                                                              |                                                                                                      |
| EPI_ISL_622985, EPI_ISL_622986                                                                                                                                                                                                                                                                                                                                                                                                                                                                                                                                                                                                                                                                                                                                                                                                                                                                                                                                                                                                                                                                                 | Lancet Laboratories                                                                                                                                                   | National Institute for Communicable Diseases of the National Health Laboratory Service                                                                                                                                                                                                                                                                                   | Allam M, Ismail A, Khumalo Z, Kwenda S, Mtshali P, Mnyameni F, Mohale T, Subramoney K, Bhiman JN                                                                                                                                                              |                                                                                                      |
| EPI_ISL_622987                                                                                                                                                                                                                                                                                                                                                                                                                                                                                                                                                                                                                                                                                                                                                                                                                                                                                                                                                                                                                                                                                                 | National Health Laboratory Service                                                                                                                                    | National Institute for Communicable Diseases of the National Health Laboratory Service                                                                                                                                                                                                                                                                                   | Allam M, Ismail A, Khumalo Z, Kwenda S, Mtshali P, Mnyameni F, Mohale T, Subramoney K, Bhiman JN                                                                                                                                                              |                                                                                                      |
| EPI_ISL_622988                                                                                                                                                                                                                                                                                                                                                                                                                                                                                                                                                                                                                                                                                                                                                                                                                                                                                                                                                                                                                                                                                                 | Lancet Laboratories                                                                                                                                                   | National Institute for Communicable Diseases of the National Health Laboratory Service                                                                                                                                                                                                                                                                                   | Allam M, Ismail A, Khumalo Z, Kwenda S, Mtshali P, Mnyameni F, Mohale T, Subramoney K, Bhiman JN                                                                                                                                                              |                                                                                                      |
| EPI_ISL_622989                                                                                                                                                                                                                                                                                                                                                                                                                                                                                                                                                                                                                                                                                                                                                                                                                                                                                                                                                                                                                                                                                                 | National Health Laboratory Service                                                                                                                                    | National Institute for Communicable Diseases of the National Health Laboratory Service                                                                                                                                                                                                                                                                                   | Allam M, Ismail A, Khumalo Z, Kwenda S, Mtshali P, Mnyameni F, Mohale T, Subramoney K, Bhiman JN                                                                                                                                                              |                                                                                                      |
| EPI_ISL_622990                                                                                                                                                                                                                                                                                                                                                                                                                                                                                                                                                                                                                                                                                                                                                                                                                                                                                                                                                                                                                                                                                                 | Lancet Laboratories                                                                                                                                                   | National Institute for Communicable Diseases of the National Health Laboratory Service                                                                                                                                                                                                                                                                                   | Allam M, Ismail A, Khumalo Z, Kwenda S, Mtshali P, Mnyameni F, Mohale T, Subramoney K, Bhiman JN                                                                                                                                                              |                                                                                                      |
| EPI_ISL_622991, EPI_ISL_622992, EPI_ISL_622993                                                                                                                                                                                                                                                                                                                                                                                                                                                                                                                                                                                                                                                                                                                                                                                                                                                                                                                                                                                                                                                                 | National Health Laboratory Service                                                                                                                                    | National Institute for Communicable Diseases of the National Health Laboratory Service                                                                                                                                                                                                                                                                                   | Allam M, Ismail A, Khumalo Z, Kwenda S, Mtshali P, Mnyameni F, Mohale T, Subramoney K, Bhiman JN                                                                                                                                                              |                                                                                                      |
| EPI_ISL_622994                                                                                                                                                                                                                                                                                                                                                                                                                                                                                                                                                                                                                                                                                                                                                                                                                                                                                                                                                                                                                                                                                                 | Lancet Laboratories                                                                                                                                                   | National Institute for Communicable Diseases of the National Health Laboratory Service                                                                                                                                                                                                                                                                                   | Allam M, Ismail A, Khumalo Z, Kwenda S, Mtshali P, Mnyameni F, Mohale T, Subramoney K, Bhiman JN                                                                                                                                                              |                                                                                                      |
| EPI_ISL_622995, EPI_ISL_622996, EPI_ISL_622997, EPI_ISL_622998, EPI_ISL_622999, EPI_ISL_623000, EPI_ISL_623001, EPI_ISL_623002, EPI_ISL_623003, EPI_ISL_623004, EPI_ISL_623005, EPI_ISL_623006, EPI_ISL_623007, EPI_ISL_623008, EPI_ISL_623009, EPI_ISL_623010, EPI_ISL_623011, EPI_ISL_623012, EPI_ISL_623013, EPI_ISL_623014, EPI_ISL_623015, EPI_ISL_623016, EPI_ISL_623017, EPI_ISL_623018, EPI_ISL_623019, EPI_ISL_623020, EPI_ISL_623021, EPI_ISL_623022, EPI_ISL_623023, EPI_ISL_623024, EPI_ISL_623026, EPI_ISL_623027, EPI_ISL_623029, EPI_ISL_623030, EPI_ISL_623031, EPI_ISL_623032, EPI_ISL_623033, EPI_ISL_623034, EPI_ISL_623035, EPI_ISL_623036, EPI_ISL_623037, EPI_ISL_623038, EPI_ISL_623039, EPI_ISL_623040, EPI_ISL_623041, EPI_ISL_623042, EPI_ISL_623043, EPI_ISL_623044, EPI_ISL_623045, EPI_ISL_623046, EPI_ISL_623047, EPI_ISL_623048, EPI_ISL_623049, EPI_ISL_623050, EPI_ISL_623051, EPI_ISL_623052, EPI_ISL_623053, EPI_ISL_623054, EPI_ISL_623055, EPI_ISL_623056, EPI_ISL_623057, EPI_ISL_623058, EPI_ISL_623059, EPI_ISL_623060, EPI_ISL_623061, EPI_ISL_623062, EPI_ISL_623063 | see above                                                                                                                                                             | National Health Laboratory Service                                                                                                                                                                                                                                                                                                                                       | National Institute for Communicable Diseases of the National Health Laboratory Service                                                                                                                                                                        | Allam M, Ismail A, Khumalo Z, Kwenda S, Mtshali P, Mnyameni F, Mohale T, Subramoney K, Bhiman JN     |
| EPI_ISL_623064                                                                                                                                                                                                                                                                                                                                                                                                                                                                                                                                                                                                                                                                                                                                                                                                                                                                                                                                                                                                                                                                                                 | Lancet Laboratories                                                                                                                                                   | National Institute for Communicable Diseases of the National Health Laboratory Service                                                                                                                                                                                                                                                                                   | Allam M, Ismail A, Khumalo Z, Kwenda S, Mtshali P, Mnyameni F, Mohale T, Subramoney K, Bhiman JN                                                                                                                                                              |                                                                                                      |
| EPI_ISL_623065, EPI_ISL_623066, EPI_ISL_623067                                                                                                                                                                                                                                                                                                                                                                                                                                                                                                                                                                                                                                                                                                                                                                                                                                                                                                                                                                                                                                                                 | National Health Laboratory Service                                                                                                                                    | National Institute for Communicable Diseases of the National Health Laboratory Service                                                                                                                                                                                                                                                                                   | Allam M, Ismail A, Khumalo Z, Kwenda S, Mtshali P, Mnyameni F, Mohale T, Subramoney K, Bhiman JN                                                                                                                                                              |                                                                                                      |
| EPI_ISL_623068                                                                                                                                                                                                                                                                                                                                                                                                                                                                                                                                                                                                                                                                                                                                                                                                                                                                                                                                                                                                                                                                                                 | Lancet Laboratories                                                                                                                                                   | National Institute for Communicable Diseases of the National Health Laboratory Service                                                                                                                                                                                                                                                                                   | Allam M, Ismail A, Khumalo Z, Kwenda S, Mtshali P, Mnyameni F, Mohale T, Subramoney K, Bhiman JN                                                                                                                                                              |                                                                                                      |
| EPI_ISL_623069, EPI_ISL_623070, EPI_ISL_623071, EPI_ISL_623072                                                                                                                                                                                                                                                                                                                                                                                                                                                                                                                                                                                                                                                                                                                                                                                                                                                                                                                                                                                                                                                 | National Health Laboratory Service                                                                                                                                    | National Institute for Communicable Diseases of the National Health Laboratory Service                                                                                                                                                                                                                                                                                   | Allam M, Ismail A, Khumalo Z, Kwenda S, Mtshali P, Mnyameni F, Mohale T, Subramoney K, Bhiman JN                                                                                                                                                              |                                                                                                      |
| EPI_ISL_623073                                                                                                                                                                                                                                                                                                                                                                                                                                                                                                                                                                                                                                                                                                                                                                                                                                                                                                                                                                                                                                                                                                 | Lancet Laboratories                                                                                                                                                   | National Institute for Communicable Diseases of the National Health Laboratory Service                                                                                                                                                                                                                                                                                   | Allam M, Ismail A, Khumalo Z, Kwenda S, Mtshali P, Mnyameni F, Mohale T, Subramoney K, Bhiman JN                                                                                                                                                              |                                                                                                      |
| EPI_ISL_625456                                                                                                                                                                                                                                                                                                                                                                                                                                                                                                                                                                                                                                                                                                                                                                                                                                                                                                                                                                                                                                                                                                 | Virology Unit, Institut Pasteur de Madagascar                                                                                                                         | Virology Unit, Institut Pasteur de Madagascar                                                                                                                                                                                                                                                                                                                            | Christian Ranaivoson, Cara Brook, Norosoa Razanajatovo, Vida Ahyong, Tsiry Randriambolanantsoa, Michelle Tan, Vololoniaina Raharinosy, Helisoa Razafimanjato, Cristina M. Tato, Joseph L. DeRisi, Soa Fy Andriamandimby, Jean-Michel Heraud, Philippe Dussart |                                                                                                      |
| EPI_ISL_628750, EPI_ISL_628751, EPI_ISL_628752, EPI_ISL_628753, EPI_ISL_628754, EPI_ISL_628755, EPI_ISL_628756, EPI_ISL_628757, EPI_ISL_628758, EPI_ISL_628759, EPI_ISL_628760, EPI_ISL_628761                                                                                                                                                                                                                                                                                                                                                                                                                                                                                                                                                                                                                                                                                                                                                                                                                                                                                                                 | see above                                                                                                                                                             | UHAS COVID-19 Lab                                                                                                                                                                                                                                                                                                                                                        | UHAS COVID-19 Lab                                                                                                                                                                                                                                             | Kwabena O. Duedu, Jones Gyamfi, Reuben Ayivor-Djanie, John O. Gyapong and the UHAS COVID-19 Lab Team |
| EPI_ISL_632310                                                                                                                                                                                                                                                                                                                                                                                                                                                                                                                                                                                                                                                                                                                                                                                                                                                                                                                                                                                                                                                                                                 | 1-Laboratory of Microbiology, National Reference Lab, Charles Nicolle Hospital; 2-University of Tunis ElManar, Faculty of Medicine of Tunis, LR99ES09, Tunis, Tunisia | 1-Clinical and Experimental Pharmacology Lab, LR16SP02, National Center of Pharmacovigilance, University of Tunis El Manar, Tunis, Tunisia. 2-Neurodegenerative diseases and psychiatric troubles, LR18SP03, Razi Hospital, University of Tunis El Manar, Tunis, Tunisia. 3- Ministry of Health, National Observatory of New and Emerging Diseases, 1006, Tunis, Tunisia | Ilhem Boutiba-Ben Boubaker, Sameh Trabelsi, Nissaf Ben Alaya, Maher Kharrat, Alia Ben Kahla, Jalila Ben Khelil, Salma Abid, Sana Ferjani, Mouna Ben Sassi, Mouna Safer, Imen Mkada, Imen Kacem, Gaies Emna, Soumaya Rammeh, Riadh Daghfous, Riadh Gouider.    |                                                                                                      |
| EPI_ISL_634977                                                                                                                                                                                                                                                                                                                                                                                                                                                                                                                                                                                                                                                                                                                                                                                                                                                                                                                                                                                                                                                                                                 | 1-Laboratory of Microbiology, National Reference Lab, Charles Nicolle Hospital; 2-University of Tunis ElManar, Faculty of Medicine of Tunis, LR99ES09, Tunis, Tunisia | 1-Clinical and Experimental Pharmacology Lab, LR16SP02, National Center of Pharmacovigilance, University of Tunis El Manar, Tunis, Tunisia. 2-Neurodegenerative diseases and psychiatric troubles, LR18SP03, Razi Hospital, University of Tunis El Manar, Tunis, Tunisia. 3- Ministry of Health, National Observatory of New and Emerging Diseases, 1006, Tunis, Tunisia | Ilhem Boutiba-Ben Boubaker, Sameh Trabelsi, Nissaf Ben Alaya, Maher Kharrat, Alia Ben Kahla, Jalila Ben Khelil, Salma Abid, Sana Ferjani, Mouna Ben Sassi, Mouna Safer, Imen Mkada, Imen Kacem, Gaies Emna, Soumaya Rammeh, Riadh Daghfous, Riadh Gouider.    |                                                                                                      |
| EPI_ISL_634978, EPI_ISL_634979, EPI_ISL_634980, EPI_ISL_634981, EPI_ISL_634982, EPI_ISL_634983, EPI_ISL_634984, EPI_ISL_634985, EPI_ISL_634986, EPI_ISL_634987, EPI_ISL_634988, EPI_ISL_634989, EPI_ISL_634990, EPI_ISL_634991, EPI_ISL_634992, EPI_ISL_634993, EPI_ISL_634994, EPI_ISL_634995, EPI_ISL_634996, EPI_ISL_634997, EPI_ISL_634998, EPI_ISL_634999, EPI_ISL_635000, EPI_ISL_635001, EPI_ISL_635002, EPI_ISL_635003, EPI_ISL_635004, EPI_ISL_635005, EPI_ISL_635006, EPI_ISL_635007, EPI_ISL_635008, EPI_ISL_635009, EPI_ISL_635010, EPI_ISL_635011, EPI_ISL_635012, EPI_ISL_635013                                                                                                                                                                                                                                                                                                                                                                                                                                                                                                                 |                                                                                                                                                                       |                                                                                                                                                                                                                                                                                                                                                                          |                                                                                                                                                                                                                                                               |                                                                                                      |

|                                                                                                                                                                                                                                                                                                                                                                                                                                                                                                                                                                                                                                                                                                                                                |           |                                                                                                                                                                       |                                                                                                                                                                                                                                                                                                                                                                          |                                                                                                                                                                                                                                                              |
|------------------------------------------------------------------------------------------------------------------------------------------------------------------------------------------------------------------------------------------------------------------------------------------------------------------------------------------------------------------------------------------------------------------------------------------------------------------------------------------------------------------------------------------------------------------------------------------------------------------------------------------------------------------------------------------------------------------------------------------------|-----------|-----------------------------------------------------------------------------------------------------------------------------------------------------------------------|--------------------------------------------------------------------------------------------------------------------------------------------------------------------------------------------------------------------------------------------------------------------------------------------------------------------------------------------------------------------------|--------------------------------------------------------------------------------------------------------------------------------------------------------------------------------------------------------------------------------------------------------------|
| EPI_ISL_635014, EPI_ISL_635015, EPI_ISL_635016, EPI_ISL_635017, EPI_ISL_635018, EPI_ISL_635019, EPI_ISL_635020, EPI_ISL_635021, EPI_ISL_635022, EPI_ISL_635023, EPI_ISL_635024, EPI_ISL_635025, EPI_ISL_635026, EPI_ISL_635027, EPI_ISL_635028, EPI_ISL_635029, EPI_ISL_635030, EPI_ISL_635031, EPI_ISL_635032, EPI_ISL_635033, EPI_ISL_635034, EPI_ISL_635035, EPI_ISL_635036, EPI_ISL_635037, EPI_ISL_635038, EPI_ISL_635039, EPI_ISL_635040, EPI_ISL_635041, EPI_ISL_635042, EPI_ISL_635043, EPI_ISL_635044, EPI_ISL_635045, EPI_ISL_635046, EPI_ISL_635047, EPI_ISL_635048, EPI_ISL_635049, EPI_ISL_635050, EPI_ISL_635051, EPI_ISL_635052, EPI_ISL_635053, EPI_ISL_635054, EPI_ISL_635055, EPI_ISL_635056, EPI_ISL_635057, EPI_ISL_635058 | see above | National Health Laboratory Service - Inkosi Albert Luthuli Central Hospital (NHLS-IALCH)                                                                              | KRISP, KZN Research Innovation and Sequencing Platform                                                                                                                                                                                                                                                                                                                   | Giandhari J, Pillay S, Lessells R, Mdlalose K, York D, Khan S, Tegally H, Wilkinson E, de Oliveira T                                                                                                                                                         |
| EPI_ISL_635059, EPI_ISL_635060, EPI_ISL_635061, EPI_ISL_635062                                                                                                                                                                                                                                                                                                                                                                                                                                                                                                                                                                                                                                                                                 |           | 1-Laboratory of Microbiology, National Reference Lab, Charles Nicolle Hospital; 2-University of Tunis ElManar, Faculty of Medicine of Tunis, LR99ES09, Tunis, Tunisia | 1-Clinical and Experimental Pharmacology Lab, LR16SP02, National Center of Pharmacovigilance, University of Tunis El Manar, Tunis, Tunisia. 2-Neurodegenerative diseases and psychiatric troubles, LR18SP03, Razi Hospital, University of Tunis El Manar, Tunis, Tunisia. 3- Ministry of Health, National Observatory of New and Emerging Diseases, 1006, Tunis, Tunisia | Ilhem Boutiba-Ben Boubaker, Sameh Trabelsi, Nissaf Ben Alaya, Maher Kharrat, Alia Ben Kahla, Jalila Ben Khellil, Salma Abid, Sana Ferjani, Mouna Ben Sassi, Mouna Safer, Imen Mkada, Imen Kacem, Gaies Emma, Soumaya Rammeh, Riadh Daghighou, Riadh Gouider. |
| EPI_ISL_636975, EPI_ISL_636976, EPI_ISL_636977, EPI_ISL_636978, EPI_ISL_636979                                                                                                                                                                                                                                                                                                                                                                                                                                                                                                                                                                                                                                                                 |           | HP Pemba                                                                                                                                                              | KRISP, KZN Research Innovation and Sequencing Platform                                                                                                                                                                                                                                                                                                                   | Ismael N, Giandhari J, Pillay S, Tegally H, Wilkinson E, de Oliveira T, Nadia Siteo, Paulo Arnaldo, Nedio Mabunda                                                                                                                                            |
| EPI_ISL_636980                                                                                                                                                                                                                                                                                                                                                                                                                                                                                                                                                                                                                                                                                                                                 |           | CS Xai Xai                                                                                                                                                            | KRISP, KZN Research Innovation and Sequencing Platform                                                                                                                                                                                                                                                                                                                   | Ismael N, Giandhari J, Pillay S, Tegally H, Wilkinson E, de Oliveira T, Nadia Siteo, Paulo Arnaldo, Nedio Mabunda                                                                                                                                            |
| EPI_ISL_636981                                                                                                                                                                                                                                                                                                                                                                                                                                                                                                                                                                                                                                                                                                                                 |           | City of Chimoio                                                                                                                                                       | KRISP, KZN Research Innovation and Sequencing Platform                                                                                                                                                                                                                                                                                                                   | Ismael N, Giandhari J, Pillay S, Tegally H, Wilkinson E, de Oliveira T, Nadia Siteo, Paulo Arnaldo, Nedio Mabunda                                                                                                                                            |
| EPI_ISL_636982, EPI_ISL_636983, EPI_ISL_636984, EPI_ISL_636985, EPI_ISL_636986, EPI_ISL_636987, EPI_ISL_636988                                                                                                                                                                                                                                                                                                                                                                                                                                                                                                                                                                                                                                 |           | Virology Lab, National Institute for Biomedical Research (INRB)                                                                                                       | Project group Epidemiology of Highly Pathogenic Microorganisms, Robert Koch-Institute                                                                                                                                                                                                                                                                                    | Jean-Jacques Muyembe Tamfum, Steve Ahuka-Mundeke, Eddy Kinganda-Lusamaki, Gabriel Mbunzu, Sheila Makiala, Essia Belarbi, Jasmin Schlotterbeck, Grit Schubert, Fabian Leendertz                                                                               |
| EPI_ISL_640015                                                                                                                                                                                                                                                                                                                                                                                                                                                                                                                                                                                                                                                                                                                                 |           | Conville CDC wc CVC                                                                                                                                                   | NHLS/UCT                                                                                                                                                                                                                                                                                                                                                                 | Arash Iranzadeh, Deelan Doolabh, Lynn Tyers, Bruna Galvao, Innocent Mudau, Marvin Hsiao, Kruger Marais, Diana Hardie, Stephen Korsman, Carolyn Williamson                                                                                                    |
| EPI_ISL_640016                                                                                                                                                                                                                                                                                                                                                                                                                                                                                                                                                                                                                                                                                                                                 |           | George Hospital wc GRH                                                                                                                                                | NHLS/UCT                                                                                                                                                                                                                                                                                                                                                                 | Arash Iranzadeh, Deelan Doolabh, Lynn Tyers, Bruna Galvao, Innocent Mudau, Marvin Hsiao, Kruger Marais, Diana Hardie, Stephen Korsman, Carolyn Williamson                                                                                                    |
| EPI_ISL_640017                                                                                                                                                                                                                                                                                                                                                                                                                                                                                                                                                                                                                                                                                                                                 |           | Oudtshoorn Hospital wc OUD                                                                                                                                            | NHLS/UCT                                                                                                                                                                                                                                                                                                                                                                 | Arash Iranzadeh, Deelan Doolabh, Lynn Tyers, Bruna Galvao, Innocent Mudau, Marvin Hsiao, Kruger Marais, Diana Hardie, Stephen Korsman, Carolyn Williamson                                                                                                    |
| EPI_ISL_640018                                                                                                                                                                                                                                                                                                                                                                                                                                                                                                                                                                                                                                                                                                                                 |           | Heidelberg Clinic wc HBC                                                                                                                                              | NHLS/UCT                                                                                                                                                                                                                                                                                                                                                                 | Arash Iranzadeh, Deelan Doolabh, Lynn Tyers, Bruna Galvao, Innocent Mudau, Marvin Hsiao, Kruger Marais, Diana Hardie, Stephen Korsman, Carolyn Williamson                                                                                                    |
| EPI_ISL_640019                                                                                                                                                                                                                                                                                                                                                                                                                                                                                                                                                                                                                                                                                                                                 |           | Thembaletu CDC wc THC                                                                                                                                                 | NHLS/UCT                                                                                                                                                                                                                                                                                                                                                                 | Arash Iranzadeh, Deelan Doolabh, Lynn Tyers, Bruna Galvao, Innocent Mudau, Marvin Hsiao, Kruger Marais, Diana Hardie, Stephen Korsman, Carolyn Williamson                                                                                                    |
| EPI_ISL_640020                                                                                                                                                                                                                                                                                                                                                                                                                                                                                                                                                                                                                                                                                                                                 |           | Mitchells Plain Hospital wc MPH                                                                                                                                       | NHLS/UCT                                                                                                                                                                                                                                                                                                                                                                 | Arash Iranzadeh, Deelan Doolabh, Lynn Tyers, Bruna Galvao, Innocent Mudau, Marvin Hsiao, Kruger Marais, Diana Hardie, Stephen Korsman, Carolyn Williamson                                                                                                    |
| EPI_ISL_640021                                                                                                                                                                                                                                                                                                                                                                                                                                                                                                                                                                                                                                                                                                                                 |           | Victoria Hospital wc VHW                                                                                                                                              | NHLS/UCT                                                                                                                                                                                                                                                                                                                                                                 | Arash Iranzadeh, Deelan Doolabh, Lynn Tyers, Bruna Galvao, Innocent Mudau, Marvin Hsiao, Kruger Marais, Diana Hardie, Stephen Korsman, Carolyn Williamson                                                                                                    |
| EPI_ISL_640022                                                                                                                                                                                                                                                                                                                                                                                                                                                                                                                                                                                                                                                                                                                                 |           | Knysna Hospital wc KNY                                                                                                                                                | NHLS/UCT                                                                                                                                                                                                                                                                                                                                                                 | Arash Iranzadeh, Deelan Doolabh, Lynn Tyers, Bruna Galvao, Innocent Mudau, Marvin Hsiao, Kruger Marais, Diana Hardie, Stephen Korsman, Carolyn Williamson                                                                                                    |
| EPI_ISL_640023                                                                                                                                                                                                                                                                                                                                                                                                                                                                                                                                                                                                                                                                                                                                 |           | Oudtshoorn Hospital wc OUD                                                                                                                                            | NHLS/UCT                                                                                                                                                                                                                                                                                                                                                                 | Arash Iranzadeh, Deelan Doolabh, Lynn Tyers, Bruna Galvao, Innocent Mudau, Marvin Hsiao, Kruger Marais, Diana Hardie, Stephen Korsman, Carolyn Williamson                                                                                                    |
| EPI_ISL_640024                                                                                                                                                                                                                                                                                                                                                                                                                                                                                                                                                                                                                                                                                                                                 |           | Dysselsdorp Clinic wc DDC                                                                                                                                             | NHLS/UCT                                                                                                                                                                                                                                                                                                                                                                 | Arash Iranzadeh, Deelan Doolabh, Lynn Tyers, Bruna Galvao, Innocent Mudau, Marvin Hsiao, Kruger Marais, Diana Hardie, Stephen Korsman, Carolyn Williamson                                                                                                    |
| EPI_ISL_640025                                                                                                                                                                                                                                                                                                                                                                                                                                                                                                                                                                                                                                                                                                                                 |           | Mitchells Plain CHC wc MHC                                                                                                                                            | NHLS/UCT                                                                                                                                                                                                                                                                                                                                                                 | Arash Iranzadeh, Deelan Doolabh, Lynn Tyers, Bruna Galvao, Innocent Mudau, Marvin Hsiao, Kruger Marais, Diana Hardie, Stephen Korsman, Carolyn Williamson                                                                                                    |
| EPI_ISL_640026                                                                                                                                                                                                                                                                                                                                                                                                                                                                                                                                                                                                                                                                                                                                 |           | Thembaletu CDC wc THC                                                                                                                                                 | NHLS/UCT                                                                                                                                                                                                                                                                                                                                                                 | Arash Iranzadeh, Deelan Doolabh, Lynn Tyers, Bruna Galvao, Innocent Mudau, Marvin Hsiao, Kruger Marais, Diana Hardie, Stephen Korsman, Carolyn Williamson                                                                                                    |
| EPI_ISL_640027                                                                                                                                                                                                                                                                                                                                                                                                                                                                                                                                                                                                                                                                                                                                 |           | George Hospital wc GRH                                                                                                                                                | NHLS/UCT                                                                                                                                                                                                                                                                                                                                                                 | Arash Iranzadeh, Deelan Doolabh, Lynn Tyers, Bruna Galvao, Innocent Mudau, Marvin Hsiao, Kruger Marais, Diana Hardie, Stephen Korsman, Carolyn Williamson                                                                                                    |
| EPI_ISL_640028                                                                                                                                                                                                                                                                                                                                                                                                                                                                                                                                                                                                                                                                                                                                 |           | Mitchells Plain Hospital wc MPH                                                                                                                                       | NHLS/UCT                                                                                                                                                                                                                                                                                                                                                                 | Arash Iranzadeh, Deelan Doolabh, Lynn Tyers, Bruna Galvao, Innocent Mudau, Marvin Hsiao, Kruger Marais, Diana Hardie, Stephen Korsman, Carolyn Williamson                                                                                                    |
| EPI_ISL_640029                                                                                                                                                                                                                                                                                                                                                                                                                                                                                                                                                                                                                                                                                                                                 |           | D'Almeida Clinic wc DAL                                                                                                                                               | NHLS/UCT                                                                                                                                                                                                                                                                                                                                                                 | Arash Iranzadeh, Deelan Doolabh, Lynn Tyers, Bruna Galvao, Innocent Mudau, Marvin Hsiao, Kruger Marais, Diana Hardie, Stephen Korsman, Carolyn Williamson                                                                                                    |
| EPI_ISL_640030                                                                                                                                                                                                                                                                                                                                                                                                                                                                                                                                                                                                                                                                                                                                 |           | Kwamandlenkosi Clinic wc KMN                                                                                                                                          | NHLS/UCT                                                                                                                                                                                                                                                                                                                                                                 | Arash Iranzadeh, Deelan Doolabh, Lynn Tyers, Bruna Galvao, Innocent Mudau, Marvin Hsiao, Kruger Marais, Diana Hardie, Stephen Korsman, Carolyn Williamson                                                                                                    |
| EPI_ISL_640031                                                                                                                                                                                                                                                                                                                                                                                                                                                                                                                                                                                                                                                                                                                                 |           | Beaufort West Hospital wc BWH                                                                                                                                         | NHLS/UCT                                                                                                                                                                                                                                                                                                                                                                 | Arash Iranzadeh, Deelan Doolabh, Lynn Tyers, Bruna Galvao, Innocent Mudau, Marvin Hsiao, Kruger Marais, Diana Hardie, Stephen Korsman, Carolyn Williamson                                                                                                    |
| EPI_ISL_640032                                                                                                                                                                                                                                                                                                                                                                                                                                                                                                                                                                                                                                                                                                                                 |           | Victoria Hospital wc VHW                                                                                                                                              | NHLS/UCT                                                                                                                                                                                                                                                                                                                                                                 | Arash Iranzadeh, Deelan Doolabh, Lynn Tyers, Bruna Galvao, Innocent Mudau, Marvin Hsiao, Kruger Marais, Diana Hardie, Stephen Korsman, Carolyn Williamson                                                                                                    |
| EPI_ISL_640033                                                                                                                                                                                                                                                                                                                                                                                                                                                                                                                                                                                                                                                                                                                                 |           | False Bay Hospital wc FBH                                                                                                                                             | NHLS/UCT                                                                                                                                                                                                                                                                                                                                                                 | Arash Iranzadeh, Deelan Doolabh, Lynn Tyers, Bruna Galvao, Innocent Mudau, Marvin Hsiao, Kruger Marais, Diana Hardie, Stephen Korsman, Carolyn Williamson                                                                                                    |
| EPI_ISL_640034                                                                                                                                                                                                                                                                                                                                                                                                                                                                                                                                                                                                                                                                                                                                 |           | Sedgefield Clinic wc SGE                                                                                                                                              | NHLS/UCT                                                                                                                                                                                                                                                                                                                                                                 | Arash Iranzadeh, Deelan Doolabh, Lynn Tyers, Bruna Galvao, Innocent Mudau, Marvin Hsiao, Kruger Marais, Diana Hardie, Stephen Korsman, Carolyn Williamson                                                                                                    |
| EPI_ISL_640035                                                                                                                                                                                                                                                                                                                                                                                                                                                                                                                                                                                                                                                                                                                                 |           | Riversdale Clinic wc RAV                                                                                                                                              | NHLS/UCT                                                                                                                                                                                                                                                                                                                                                                 | Arash Iranzadeh, Deelan Doolabh, Lynn Tyers, Bruna Galvao, Innocent Mudau, Marvin Hsiao, Kruger Marais, Diana Hardie, Stephen Korsman, Carolyn Williamson                                                                                                    |
| EPI_ISL_640036                                                                                                                                                                                                                                                                                                                                                                                                                                                                                                                                                                                                                                                                                                                                 |           | Bridgeton CDC wc BTC                                                                                                                                                  | NHLS/UCT                                                                                                                                                                                                                                                                                                                                                                 | Arash Iranzadeh, Deelan Doolabh, Lynn Tyers, Bruna Galvao, Innocent Mudau, Marvin Hsiao, Kruger Marais, Diana Hardie, Stephen Korsman, Carolyn Williamson                                                                                                    |
| EPI_ISL_640037                                                                                                                                                                                                                                                                                                                                                                                                                                                                                                                                                                                                                                                                                                                                 |           | Valkenberg Hospital wc VBH                                                                                                                                            | NHLS/UCT                                                                                                                                                                                                                                                                                                                                                                 | Arash Iranzadeh, Deelan Doolabh, Lynn Tyers, Bruna Galvao, Innocent Mudau, Marvin Hsiao, Kruger Marais, Diana Hardie, Stephen Korsman, Carolyn Williamson                                                                                                    |
| EPI_ISL_640038                                                                                                                                                                                                                                                                                                                                                                                                                                                                                                                                                                                                                                                                                                                                 |           | Knysna Hospital wc KNY                                                                                                                                                | NHLS/UCT                                                                                                                                                                                                                                                                                                                                                                 | Arash Iranzadeh, Deelan Doolabh, Lynn Tyers, Bruna Galvao, Innocent Mudau, Marvin Hsiao, Kruger Marais, Diana Hardie, Stephen Korsman, Carolyn Williamson                                                                                                    |
| EPI_ISL_640039                                                                                                                                                                                                                                                                                                                                                                                                                                                                                                                                                                                                                                                                                                                                 |           | Mossel Bay Hospital wc MBY                                                                                                                                            | NHLS/UCT                                                                                                                                                                                                                                                                                                                                                                 | Arash Iranzadeh, Deelan Doolabh, Lynn Tyers, Bruna Galvao, Innocent Mudau, Marvin Hsiao, Kruger Marais, Diana Hardie, Stephen Korsman, Carolyn Williamson                                                                                                    |
| EPI_ISL_640040                                                                                                                                                                                                                                                                                                                                                                                                                                                                                                                                                                                                                                                                                                                                 |           | Groote Schuur Hospital wc GSH                                                                                                                                         | NHLS/UCT                                                                                                                                                                                                                                                                                                                                                                 | Arash Iranzadeh, Deelan Doolabh, Lynn Tyers, Bruna Galvao, Innocent Mudau, Marvin Hsiao, Kruger Marais, Diana Hardie, Stephen Korsman, Carolyn Williamson                                                                                                    |

|                                                                                |                                 |          |                                                                                                                                                                         |
|--------------------------------------------------------------------------------|---------------------------------|----------|-------------------------------------------------------------------------------------------------------------------------------------------------------------------------|
| EPI_ISL_640041                                                                 | Green Point CDC wc GPH          | NHLS/UCT | Williamson<br>Arash Iranzadeh, Deelan Doolabh, Lynn Tyers, Bruna Galvao, Innocent Mudau, Marvin Hsiao, Kruger Marais, Diana Hardie, Stephen Korsman, Carolyn Williamson |
| EPI_ISL_640042                                                                 | Pelican Park CDC wc PAX         | NHLS/UCT | Arash Iranzadeh, Deelan Doolabh, Lynn Tyers, Bruna Galvao, Innocent Mudau, Marvin Hsiao, Kruger Marais, Diana Hardie, Stephen Korsman, Carolyn Williamson               |
| EPI_ISL_640043                                                                 | Groote Schuur Hospital wc GSH   | NHLS/UCT | Arash Iranzadeh, Deelan Doolabh, Lynn Tyers, Bruna Galvao, Innocent Mudau, Marvin Hsiao, Kruger Marais, Diana Hardie, Stephen Korsman, Carolyn Williamson               |
| EPI_ISL_640044                                                                 | District 6 CDC wc DSI           | NHLS/UCT | Arash Iranzadeh, Deelan Doolabh, Lynn Tyers, Bruna Galvao, Innocent Mudau, Marvin Hsiao, Kruger Marais, Diana Hardie, Stephen Korsman, Carolyn Williamson               |
| EPI_ISL_640045                                                                 | Groote Schuur Hospital wc GSH   | NHLS/UCT | Arash Iranzadeh, Deelan Doolabh, Lynn Tyers, Bruna Galvao, Innocent Mudau, Marvin Hsiao, Kruger Marais, Diana Hardie, Stephen Korsman, Carolyn Williamson               |
| EPI_ISL_640046                                                                 | Valkenberg Hospital wc VBH      | NHLS/UCT | Arash Iranzadeh, Deelan Doolabh, Lynn Tyers, Bruna Galvao, Innocent Mudau, Marvin Hsiao, Kruger Marais, Diana Hardie, Stephen Korsman, Carolyn Williamson               |
| EPI_ISL_640047                                                                 | Beaufort West Hospital wc BWH   | NHLS/UCT | Arash Iranzadeh, Deelan Doolabh, Lynn Tyers, Bruna Galvao, Innocent Mudau, Marvin Hsiao, Kruger Marais, Diana Hardie, Stephen Korsman, Carolyn Williamson               |
| EPI_ISL_640048                                                                 | D'Almeida Clinic wc DAL         | NHLS/UCT | Arash Iranzadeh, Deelan Doolabh, Lynn Tyers, Bruna Galvao, Innocent Mudau, Marvin Hsiao, Kruger Marais, Diana Hardie, Stephen Korsman, Carolyn Williamson               |
| EPI_ISL_640049                                                                 | George Road Sat Clinic wc GWM   | NHLS/UCT | Arash Iranzadeh, Deelan Doolabh, Lynn Tyers, Bruna Galvao, Innocent Mudau, Marvin Hsiao, Kruger Marais, Diana Hardie, Stephen Korsman, Carolyn Williamson               |
| EPI_ISL_640050                                                                 | False Bay Hospital wc FBH       | NHLS/UCT | Arash Iranzadeh, Deelan Doolabh, Lynn Tyers, Bruna Galvao, Innocent Mudau, Marvin Hsiao, Kruger Marais, Diana Hardie, Stephen Korsman, Carolyn Williamson               |
| EPI_ISL_640051, EPI_ISL_640052, EPI_ISL_640053, EPI_ISL_640054, EPI_ISL_640055 | Groote Schuur Hospital wc GSH   | NHLS/UCT | Arash Iranzadeh, Deelan Doolabh, Lynn Tyers, Bruna Galvao, Innocent Mudau, Marvin Hsiao, Kruger Marais, Diana Hardie, Stephen Korsman, Carolyn Williamson               |
| EPI_ISL_640056                                                                 | 2 Military Hospital wc MAA      | NHLS/UCT | Arash Iranzadeh, Deelan Doolabh, Lynn Tyers, Bruna Galvao, Innocent Mudau, Marvin Hsiao, Kruger Marais, Diana Hardie, Stephen Korsman, Carolyn Williamson               |
| EPI_ISL_640057                                                                 | Du Noon CDC wc DNC              | NHLS/UCT | Arash Iranzadeh, Deelan Doolabh, Lynn Tyers, Bruna Galvao, Innocent Mudau, Marvin Hsiao, Kruger Marais, Diana Hardie, Stephen Korsman, Carolyn Williamson               |
| EPI_ISL_640058                                                                 | Groote Schuur Hospital wc GSH   | NHLS/UCT | Arash Iranzadeh, Deelan Doolabh, Lynn Tyers, Bruna Galvao, Innocent Mudau, Marvin Hsiao, Kruger Marais, Diana Hardie, Stephen Korsman, Carolyn Williamson               |
| EPI_ISL_640059                                                                 | Du Noon CDC wc DNC              | NHLS/UCT | Arash Iranzadeh, Deelan Doolabh, Lynn Tyers, Bruna Galvao, Innocent Mudau, Marvin Hsiao, Kruger Marais, Diana Hardie, Stephen Korsman, Carolyn Williamson               |
| EPI_ISL_640060, EPI_ISL_640061                                                 | Groote Schuur Hospital wc GSH   | NHLS/UCT | Arash Iranzadeh, Deelan Doolabh, Lynn Tyers, Bruna Galvao, Innocent Mudau, Marvin Hsiao, Kruger Marais, Diana Hardie, Stephen Korsman, Carolyn Williamson               |
| EPI_ISL_640062, EPI_ISL_640063                                                 | CoVid WC Cape Town Metro        | NHLS/UCT | Arash Iranzadeh, Deelan Doolabh, Lynn Tyers, Bruna Galvao, Innocent Mudau, Marvin Hsiao, Kruger Marais, Diana Hardie, Stephen Korsman, Carolyn Williamson               |
| EPI_ISL_640064                                                                 | Ethembeni Clinic [Prieska]      | NHLS/UCT | Arash Iranzadeh, Deelan Doolabh, Lynn Tyers, Bruna Galvao, Innocent Mudau, Marvin Hsiao, Kruger Marais, Diana Hardie, Stephen Korsman, Carolyn Williamson               |
| EPI_ISL_640065                                                                 | Mitchells Plain Hospital wc MPH | NHLS/UCT | Arash Iranzadeh, Deelan Doolabh, Lynn Tyers, Bruna Galvao, Innocent Mudau, Marvin Hsiao, Kruger Marais, Diana Hardie, Stephen Korsman, Carolyn Williamson               |
| EPI_ISL_640066, EPI_ISL_640067                                                 | Groote Schuur Hospital wc GSH   | NHLS/UCT | Arash Iranzadeh, Deelan Doolabh, Lynn Tyers, Bruna Galvao, Innocent Mudau, Marvin Hsiao, Kruger Marais, Diana Hardie, Stephen Korsman, Carolyn Williamson               |
| EPI_ISL_640068                                                                 | Clinic-in-Asla                  | NHLS/UCT | Arash Iranzadeh, Deelan Doolabh, Lynn Tyers, Bruna Galvao, Innocent Mudau, Marvin Hsiao, Kruger Marais, Diana Hardie, Stephen Korsman, Carolyn Williamson               |
| EPI_ISL_640069, EPI_ISL_640070, EPI_ISL_640071                                 | Guguletu CHC wc GDH             | NHLS/UCT | Arash Iranzadeh, Deelan Doolabh, Lynn Tyers, Bruna Galvao, Innocent Mudau, Marvin Hsiao, Kruger Marais, Diana Hardie, Stephen Korsman, Carolyn Williamson               |
| EPI_ISL_640072                                                                 | Vanguard CHC wc VGC             | NHLS/UCT | Arash Iranzadeh, Deelan Doolabh, Lynn Tyers, Bruna Galvao, Innocent Mudau, Marvin Hsiao, Kruger Marais, Diana Hardie, Stephen Korsman, Carolyn Williamson               |
| EPI_ISL_640073                                                                 | unknown                         | NHLS/UCT | Arash Iranzadeh, Deelan Doolabh, Lynn Tyers, Bruna Galvao, Innocent Mudau, Marvin Hsiao, Kruger Marais, Diana Hardie, Stephen Korsman, Carolyn Williamson               |
| EPI_ISL_640074                                                                 | Mamre CDC wc MRC                | NHLS/UCT | Arash Iranzadeh, Deelan Doolabh, Lynn Tyers, Bruna Galvao, Innocent Mudau, Marvin Hsiao, Kruger Marais, Diana Hardie, Stephen Korsman, Carolyn Williamson               |
| EPI_ISL_640075                                                                 | Bothasig CDC wc BLD             | NHLS/UCT | Arash Iranzadeh, Deelan Doolabh, Lynn Tyers, Bruna Galvao, Innocent Mudau, Marvin Hsiao, Kruger Marais, Diana Hardie, Stephen Korsman, Carolyn Williamson               |
| EPI_ISL_640076                                                                 | Knysna Hospital wc KNY          | NHLS/UCT | Arash Iranzadeh, Deelan Doolabh, Lynn Tyers, Bruna Galvao, Innocent Mudau, Marvin Hsiao, Kruger Marais, Diana Hardie, Stephen Korsman, Carolyn Williamson               |
| EPI_ISL_640077                                                                 | Oudtshoorn Hospital wc OUD      | NHLS/UCT | Arash Iranzadeh, Deelan Doolabh, Lynn Tyers, Bruna Galvao, Innocent Mudau, Marvin Hsiao, Kruger Marais, Diana Hardie, Stephen Korsman, Carolyn Williamson               |
| EPI_ISL_640078                                                                 | 2 Military Hospital wc MAA      | NHLS/UCT | Arash Iranzadeh, Deelan Doolabh, Lynn Tyers, Bruna Galvao, Innocent Mudau, Marvin Hsiao, Kruger Marais, Diana Hardie, Stephen Korsman, Carolyn Williamson               |
| EPI_ISL_640079                                                                 | Stellenbosch Hospital wc STB    | NHLS/UCT | Arash Iranzadeh, Deelan Doolabh, Lynn Tyers, Bruna Galvao, Innocent Mudau, Marvin Hsiao, Kruger Marais, Diana Hardie, Stephen Korsman, Carolyn Williamson               |
| EPI_ISL_640080                                                                 | Mfuleni CDC wc MFU              | NHLS/UCT | Arash Iranzadeh, Deelan Doolabh, Lynn Tyers, Bruna Galvao, Innocent Mudau, Marvin Hsiao, Kruger Marais, Diana Hardie, Stephen Korsman, Carolyn Williamson               |
| EPI_ISL_640081                                                                 | Vanguard CHC wc VGC             | NHLS/UCT | Arash Iranzadeh, Deelan Doolabh, Lynn Tyers, Bruna Galvao, Innocent Mudau, Marvin Hsiao, Kruger Marais, Diana Hardie, Stephen Korsman, Carolyn Williamson               |
| EPI_ISL_640082                                                                 | Heideveld Emergency Centre      | NHLS/UCT | Arash Iranzadeh, Deelan Doolabh, Lynn Tyers, Bruna Galvao, Innocent Mudau, Marvin Hsiao, Kruger Marais, Diana Hardie, Stephen Korsman, Carolyn Williamson               |
| EPI_ISL_640083                                                                 | Khayelitsha (Site B) CHC wc KHC | NHLS/UCT | Arash Iranzadeh, Deelan Doolabh, Lynn Tyers, Bruna Galvao, Innocent Mudau, Marvin Hsiao, Kruger Marais, Diana Hardie, Stephen Korsman, Carolyn Williamson               |







|                                                                                                                                                                                                                                                                                                                                                                                                                                                                                                                                                                                                                                                                                                                                                                                                                                                                                                                                                                                                                                                                                                                                                                                                                                                                                                                                                                                |                                                                                                                                                                      |                                                                                                                                                                                                                                                                                                                                                                          |                                                                                                                                                                                                                                                                               |
|--------------------------------------------------------------------------------------------------------------------------------------------------------------------------------------------------------------------------------------------------------------------------------------------------------------------------------------------------------------------------------------------------------------------------------------------------------------------------------------------------------------------------------------------------------------------------------------------------------------------------------------------------------------------------------------------------------------------------------------------------------------------------------------------------------------------------------------------------------------------------------------------------------------------------------------------------------------------------------------------------------------------------------------------------------------------------------------------------------------------------------------------------------------------------------------------------------------------------------------------------------------------------------------------------------------------------------------------------------------------------------|----------------------------------------------------------------------------------------------------------------------------------------------------------------------|--------------------------------------------------------------------------------------------------------------------------------------------------------------------------------------------------------------------------------------------------------------------------------------------------------------------------------------------------------------------------|-------------------------------------------------------------------------------------------------------------------------------------------------------------------------------------------------------------------------------------------------------------------------------|
| EPI_ISL_660442                                                                                                                                                                                                                                                                                                                                                                                                                                                                                                                                                                                                                                                                                                                                                                                                                                                                                                                                                                                                                                                                                                                                                                                                                                                                                                                                                                 | Centre Muraz                                                                                                                                                         | Project group Epidemiology of Highly Pathogenic Microorganisms, Robert Koch Institut                                                                                                                                                                                                                                                                                     | Soumeya Ouangraoua, Abdoul-Salam Ouedraogo, Arsène Zongo, Yacouba Sawadogo, Essia Belarbi, Grit Schubert, Fabian Leendertz                                                                                                                                                    |
| EPI_ISL_660445, EPI_ISL_660446, EPI_ISL_660447, EPI_ISL_660448, EPI_ISL_660449, EPI_ISL_660450, EPI_ISL_660451, EPI_ISL_660452, EPI_ISL_660453, EPI_ISL_660454, EPI_ISL_660455, EPI_ISL_660456, EPI_ISL_660457, EPI_ISL_660458, EPI_ISL_660459, EPI_ISL_660460, EPI_ISL_660461, EPI_ISL_660462, EPI_ISL_660463, EPI_ISL_660464, EPI_ISL_660465, EPI_ISL_660466, EPI_ISL_660467, EPI_ISL_660468, EPI_ISL_660469, EPI_ISL_660470, EPI_ISL_660471, EPI_ISL_660472, EPI_ISL_660473, EPI_ISL_660474, EPI_ISL_660475, EPI_ISL_660476, EPI_ISL_660477, EPI_ISL_660478, EPI_ISL_660479, EPI_ISL_660480, EPI_ISL_660481, EPI_ISL_660482, EPI_ISL_660483, EPI_ISL_660484, EPI_ISL_660485, EPI_ISL_660486, EPI_ISL_660487, EPI_ISL_660488, EPI_ISL_660489, EPI_ISL_660490, EPI_ISL_660491, EPI_ISL_660492, EPI_ISL_660493, EPI_ISL_660494, EPI_ISL_660495, EPI_ISL_660496, EPI_ISL_660497, EPI_ISL_660498, EPI_ISL_660499, EPI_ISL_660500, EPI_ISL_660501, EPI_ISL_660502, EPI_ISL_660503, EPI_ISL_660504, EPI_ISL_660505, EPI_ISL_660506, EPI_ISL_660507, EPI_ISL_660508, EPI_ISL_660509, EPI_ISL_660510, EPI_ISL_660511, EPI_ISL_660512, EPI_ISL_660513, EPI_ISL_660514, EPI_ISL_660515, EPI_ISL_660517, EPI_ISL_660518, EPI_ISL_660519, EPI_ISL_660520, EPI_ISL_660521, EPI_ISL_660522, EPI_ISL_660523, EPI_ISL_660524, EPI_ISL_660525, EPI_ISL_660526, EPI_ISL_660527, EPI_ISL_660528 | Laboratoire de Microbiologie CHU Sourou Sanou                                                                                                                        | Centre Muraz                                                                                                                                                                                                                                                                                                                                                             | Abdoul-Salam Ouedraogo, Yacouba Sawadogo, Essia Belarbi, Grit Schubert, Fabian Leendertz, Arsène Zongo, Soumeya Ouangraoua, Zekiba Tarnagda, Lassana Sangaré, Halidou Tinto                                                                                                   |
| EPI_ISL_660605, EPI_ISL_660606, EPI_ISL_660607, EPI_ISL_660608, EPI_ISL_660609, EPI_ISL_660610, EPI_ISL_660611, EPI_ISL_660612, EPI_ISL_660613, EPI_ISL_660614, EPI_ISL_660615, EPI_ISL_660616, EPI_ISL_660617, EPI_ISL_660618, EPI_ISL_660619, EPI_ISL_660620, EPI_ISL_660621, EPI_ISL_660622, EPI_ISL_660623, EPI_ISL_660624, EPI_ISL_660625, EPI_ISL_660626, EPI_ISL_660627, EPI_ISL_660628, EPI_ISL_660629, EPI_ISL_660630, EPI_ISL_660631, EPI_ISL_660632, EPI_ISL_660633, EPI_ISL_660634, EPI_ISL_660635, EPI_ISL_660636, EPI_ISL_660637, EPI_ISL_660638, EPI_ISL_660639, EPI_ISL_660640, EPI_ISL_660641, EPI_ISL_660642, EPI_ISL_660643, EPI_ISL_660644, EPI_ISL_660645, EPI_ISL_660646, EPI_ISL_660647, EPI_ISL_660648, EPI_ISL_660649, EPI_ISL_660650, EPI_ISL_660651, EPI_ISL_660652, EPI_ISL_660653, EPI_ISL_660654, EPI_ISL_660655, EPI_ISL_660656, EPI_ISL_660657, EPI_ISL_660658, EPI_ISL_660659, EPI_ISL_660660, EPI_ISL_660661, EPI_ISL_660662, EPI_ISL_660663                                                                                                                                                                                                                                                                                                                                                                                                 | NHLS-IALCH                                                                                                                                                           | KRISP, KZN Research Innovation and Sequencing Platform                                                                                                                                                                                                                                                                                                                   | Giandhari J, Pillay S, Lessells R, Mdlalose K, York D, Khan S, Tegally H, Wilkinson E, de Oliveira T                                                                                                                                                                          |
| EPI_ISL_660664                                                                                                                                                                                                                                                                                                                                                                                                                                                                                                                                                                                                                                                                                                                                                                                                                                                                                                                                                                                                                                                                                                                                                                                                                                                                                                                                                                 | KRISP, KZN Research Innovation and Sequencing Platform                                                                                                               | KRISP, KZN Research Innovation and Sequencing Platform                                                                                                                                                                                                                                                                                                                   | Giandhari J, Pillay S, Lessells R, Mdlalose K, York D, Khan S, Tegally H, Wilkinson E, de Oliveira T                                                                                                                                                                          |
| EPI_ISL_677634, EPI_ISL_677635, EPI_ISL_677636                                                                                                                                                                                                                                                                                                                                                                                                                                                                                                                                                                                                                                                                                                                                                                                                                                                                                                                                                                                                                                                                                                                                                                                                                                                                                                                                 | Virology Unit, Institut Pasteur de Madagascar                                                                                                                        | Virology Unit, Institut Pasteur de Madagascar                                                                                                                                                                                                                                                                                                                            | Christian Ranaivoson, Cara E. Brook, Vida Ahyong, Soa Fy Andriamandimy, Vololoniana Raharinosy, Tsiry Randriambolanantsoa, Helisoa Razafimanjato, Norosoa Razanajatovo, Michelle Tan, Cristina M. Tato, Joseph L. DeRisí, Jean-Michel Heraud, Philippe Dussart                |
| EPI_ISL_678548, EPI_ISL_678549, EPI_ISL_678550, EPI_ISL_678551, EPI_ISL_678552, EPI_ISL_678553, EPI_ISL_678554, EPI_ISL_678555, EPI_ISL_678556, EPI_ISL_678557, EPI_ISL_678558, EPI_ISL_678559, EPI_ISL_678560, EPI_ISL_678561, EPI_ISL_678562, EPI_ISL_678563, EPI_ISL_678564, EPI_ISL_678565                                                                                                                                                                                                                                                                                                                                                                                                                                                                                                                                                                                                                                                                                                                                                                                                                                                                                                                                                                                                                                                                                 | Netcare                                                                                                                                                              | KRISP, KZN Research Innovation and Sequencing Platform                                                                                                                                                                                                                                                                                                                   | Giandhari J, Pillay S, Lessells R, ChimukangaraB, Mdlalose K, York D, Khan S, Tegally H, Wilkinson E, de Oliveira T                                                                                                                                                           |
| EPI_ISL_678566                                                                                                                                                                                                                                                                                                                                                                                                                                                                                                                                                                                                                                                                                                                                                                                                                                                                                                                                                                                                                                                                                                                                                                                                                                                                                                                                                                 | NHLS-IALCH                                                                                                                                                           | KRISP, KZN Research Innovation and Sequencing Platform                                                                                                                                                                                                                                                                                                                   | Giandhari J, Pillay S, Lessells R, ChimukangaraB, Mdlalose K, York D, Khan S, Tegally H, Wilkinson E, de Oliveira T                                                                                                                                                           |
| EPI_ISL_678567, EPI_ISL_678568                                                                                                                                                                                                                                                                                                                                                                                                                                                                                                                                                                                                                                                                                                                                                                                                                                                                                                                                                                                                                                                                                                                                                                                                                                                                                                                                                 | Netcare                                                                                                                                                              | KRISP, KZN Research Innovation and Sequencing Platform                                                                                                                                                                                                                                                                                                                   | Giandhari J, Pillay S, Lessells R, ChimukangaraB, Mdlalose K, York D, Khan S, Tegally H, Wilkinson E, de Oliveira T                                                                                                                                                           |
| EPI_ISL_678569, EPI_ISL_678570                                                                                                                                                                                                                                                                                                                                                                                                                                                                                                                                                                                                                                                                                                                                                                                                                                                                                                                                                                                                                                                                                                                                                                                                                                                                                                                                                 | NHLS-IALCH                                                                                                                                                           | KRISP, KZN Research Innovation and Sequencing Platform                                                                                                                                                                                                                                                                                                                   | Giandhari J, Pillay S, Lessells R, ChimukangaraB, Mdlalose K, York D, Khan S, Tegally H, Wilkinson E, de Oliveira T                                                                                                                                                           |
| EPI_ISL_678571, EPI_ISL_678572, EPI_ISL_678573                                                                                                                                                                                                                                                                                                                                                                                                                                                                                                                                                                                                                                                                                                                                                                                                                                                                                                                                                                                                                                                                                                                                                                                                                                                                                                                                 | Netcare                                                                                                                                                              | KRISP, KZN Research Innovation and Sequencing Platform                                                                                                                                                                                                                                                                                                                   | Giandhari J, Pillay S, Lessells R, ChimukangaraB, Mdlalose K, York D, Khan S, Tegally H, Wilkinson E, de Oliveira T                                                                                                                                                           |
| EPI_ISL_678574, EPI_ISL_678575                                                                                                                                                                                                                                                                                                                                                                                                                                                                                                                                                                                                                                                                                                                                                                                                                                                                                                                                                                                                                                                                                                                                                                                                                                                                                                                                                 | NHLS-IALCH                                                                                                                                                           | KRISP, KZN Research Innovation and Sequencing Platform                                                                                                                                                                                                                                                                                                                   | Giandhari J, Pillay S, Lessells R, ChimukangaraB, Mdlalose K, York D, Khan S, Tegally H, Wilkinson E, de Oliveira T                                                                                                                                                           |
| EPI_ISL_678576, EPI_ISL_678577, EPI_ISL_678578, EPI_ISL_678579, EPI_ISL_678580, EPI_ISL_678581, EPI_ISL_678582, EPI_ISL_678583, EPI_ISL_678584, EPI_ISL_678585, EPI_ISL_678586, EPI_ISL_678587, EPI_ISL_678588, EPI_ISL_678589, EPI_ISL_678590, EPI_ISL_678591, EPI_ISL_678592, EPI_ISL_678593, EPI_ISL_678594, EPI_ISL_678595, EPI_ISL_678596, EPI_ISL_678597                                                                                                                                                                                                                                                                                                                                                                                                                                                                                                                                                                                                                                                                                                                                                                                                                                                                                                                                                                                                                 | Netcare                                                                                                                                                              | KRISP, KZN Research Innovation and Sequencing Platform                                                                                                                                                                                                                                                                                                                   | Giandhari J, Pillay S, Lessells R, ChimukangaraB, Mdlalose K, York D, Khan S, Tegally H, Wilkinson E, de Oliveira T                                                                                                                                                           |
| EPI_ISL_678598, EPI_ISL_678599, EPI_ISL_678600, EPI_ISL_678601, EPI_ISL_678602, EPI_ISL_678603, EPI_ISL_678604, EPI_ISL_678605, EPI_ISL_678606, EPI_ISL_678607, EPI_ISL_678608, EPI_ISL_678609, EPI_ISL_678610, EPI_ISL_678611, EPI_ISL_678612, EPI_ISL_678613, EPI_ISL_678614, EPI_ISL_678615, EPI_ISL_678616, EPI_ISL_678617, EPI_ISL_678618, EPI_ISL_678619, EPI_ISL_678620, EPI_ISL_678621, EPI_ISL_678622, EPI_ISL_678623, EPI_ISL_678624, EPI_ISL_678625, EPI_ISL_678626, EPI_ISL_678627, EPI_ISL_678628, EPI_ISL_678629, EPI_ISL_678630, EPI_ISL_678631, EPI_ISL_678632, EPI_ISL_678633, EPI_ISL_678634, EPI_ISL_678635, EPI_ISL_678636, EPI_ISL_678637, EPI_ISL_678638, EPI_ISL_678639, EPI_ISL_678640, EPI_ISL_678641, EPI_ISL_678642, EPI_ISL_678643                                                                                                                                                                                                                                                                                                                                                                                                                                                                                                                                                                                                                 | NHLS-IALCH                                                                                                                                                           | KRISP, KZN Research Innovation and Sequencing Platform                                                                                                                                                                                                                                                                                                                   | Giandhari J, Pillay S, Lessells R, ChimukangaraB, Mdlalose K, York D, Khan S, Tegally H, Wilkinson E, de Oliveira T                                                                                                                                                           |
| EPI_ISL_681829, EPI_ISL_681830, EPI_ISL_681831, EPI_ISL_681832, EPI_ISL_681833, EPI_ISL_681834, EPI_ISL_681835, EPI_ISL_681836, EPI_ISL_681837, EPI_ISL_681838, EPI_ISL_681839, EPI_ISL_681840, EPI_ISL_681841, EPI_ISL_681842, EPI_ISL_682058, EPI_ISL_682059                                                                                                                                                                                                                                                                                                                                                                                                                                                                                                                                                                                                                                                                                                                                                                                                                                                                                                                                                                                                                                                                                                                 | Molecular diagnostic unit for viral haemorrhagic fevers and emerging viruses, Bouaké CHU Laboratory                                                                  | Project group Epidemiology of Highly Pathogenic Microorganisms, Robert Koch-Institute                                                                                                                                                                                                                                                                                    | Chantal Akoua-Koffi, Diané Bamourou, Etlé A Noah, Essia Belarbi, Safiatou Karidioula, Grit Schubert, Adjaratou Traoré, Soundélé Maité, Monemo Pacome, Coulibaly Mbegan, Bamba Fatoumata Touré, Kra Oufoué, Fabian Leendertz                                                   |
| EPI_ISL_682323, EPI_ISL_682324, EPI_ISL_682325, EPI_ISL_682326, EPI_ISL_682327, EPI_ISL_682328, EPI_ISL_682329, EPI_ISL_682330, EPI_ISL_682331, EPI_ISL_682332, EPI_ISL_682333, EPI_ISL_682334, EPI_ISL_682335, EPI_ISL_682336, EPI_ISL_682337, EPI_ISL_682338, EPI_ISL_682339, EPI_ISL_682340, EPI_ISL_682341, EPI_ISL_682342, EPI_ISL_682343, EPI_ISL_682344, EPI_ISL_682345, EPI_ISL_682346, EPI_ISL_682347, EPI_ISL_682348, EPI_ISL_682349, EPI_ISL_682350, EPI_ISL_682351, EPI_ISL_682352                                                                                                                                                                                                                                                                                                                                                                                                                                                                                                                                                                                                                                                                                                                                                                                                                                                                                 | NHLS Universitas Academic                                                                                                                                            | UFS Virology                                                                                                                                                                                                                                                                                                                                                             | PA Bester, MM Nyaga, P Nthiga, MT Mogotsi, D Goedhals, T de Oliveira                                                                                                                                                                                                          |
| EPI_ISL_683329                                                                                                                                                                                                                                                                                                                                                                                                                                                                                                                                                                                                                                                                                                                                                                                                                                                                                                                                                                                                                                                                                                                                                                                                                                                                                                                                                                 | 1-Laboratory of Microbiology, National Reference Lab, Charles Nicolle Hospital; 2-University of Tunis ElManar, Faculty of Medicine of Tunis, LR99E09, Tunis, Tunisia | 1-Clinical and Experimental Pharmacology Lab, LR16SP02, National Center of Pharmacovigilance, University of Tunis El Manar, Tunis, Tunisia. 2-Neurodegenerative diseases and psychiatric troubles, LR18SP03, Razi Hospital, University of Tunis El Manar, Tunis, Tunisia. 3- Ministry of Health, National Observatory of New and Emerging Diseases, 1006, Tunis, Tunisia | Ilhem Boutiba-Ben Boubaker, Sameh Trabelsi, Nissaf Ben Alaya, Maher Kharrat, Alia Ben Kahla, Jalila Ben Kheili, Salma Abid, Sana Ferjani, Asma Ferjani, Mouna Ben Sassi, Mouna Safer, Guedi Berrabeh, Salwa Mrabet, Hanen ElJebari, Gaies Emma, Riadh Daghfous, Riadh Gouider |
| EPI_ISL_683835                                                                                                                                                                                                                                                                                                                                                                                                                                                                                                                                                                                                                                                                                                                                                                                                                                                                                                                                                                                                                                                                                                                                                                                                                                                                                                                                                                 | CICM                                                                                                                                                                 | Malaria Research and Training Center (MRTC-Parasito)                                                                                                                                                                                                                                                                                                                     | Antoine Dara, Abdoulaye Djimde                                                                                                                                                                                                                                                |
| EPI_ISL_684047                                                                                                                                                                                                                                                                                                                                                                                                                                                                                                                                                                                                                                                                                                                                                                                                                                                                                                                                                                                                                                                                                                                                                                                                                                                                                                                                                                 | NHLS Universitas Academic                                                                                                                                            | UFS Virology                                                                                                                                                                                                                                                                                                                                                             | PA Bester, MM Nyaga, P Nthiga, MT Mogotsi, D Goedhals, T de Oliveira                                                                                                                                                                                                          |
| EPI_ISL_696452                                                                                                                                                                                                                                                                                                                                                                                                                                                                                                                                                                                                                                                                                                                                                                                                                                                                                                                                                                                                                                                                                                                                                                                                                                                                                                                                                                 | Thembaletu CDC wc THC & NHLS/UCT                                                                                                                                     | KRISP, KZN Research Innovation and Sequencing Platform                                                                                                                                                                                                                                                                                                                   | Arash Iranzadeh, Deelan Doolabh, Lynn Tyers, Bruna Galvao, Innocent Mudau, Marvin Hsiao, Kruger Marais, Jennifer Giandhari, Sureshnee Pillay, Houriyah Tegally, Emanuel James San, Tulio de Oliveira, Diana Hardie, Stephen Korsman, Carolyn Williamson                       |
| EPI_ISL_696453                                                                                                                                                                                                                                                                                                                                                                                                                                                                                                                                                                                                                                                                                                                                                                                                                                                                                                                                                                                                                                                                                                                                                                                                                                                                                                                                                                 | Pacaltsdorp Clinic wc PAC & NHLS/UCT                                                                                                                                 | KRISP, KZN Research Innovation and Sequencing Platform                                                                                                                                                                                                                                                                                                                   | Arash Iranzadeh, Deelan Doolabh, Lynn Tyers, Bruna Galvao, Innocent Mudau, Marvin Hsiao, Kruger Marais, Jennifer Giandhari, Sureshnee Pillay, Houriyah Tegally, Emanuel James San, Tulio de Oliveira, Diana Hardie, Stephen Korsman, Carolyn Williamson                       |
| EPI_ISL_696454                                                                                                                                                                                                                                                                                                                                                                                                                                                                                                                                                                                                                                                                                                                                                                                                                                                                                                                                                                                                                                                                                                                                                                                                                                                                                                                                                                 | Plettenberg Bay Clinic wc PLC & NHLS/UCT                                                                                                                             | KRISP, KZN Research Innovation and Sequencing Platform                                                                                                                                                                                                                                                                                                                   | Arash Iranzadeh, Deelan Doolabh, Lynn Tyers, Bruna Galvao, Innocent Mudau, Marvin Hsiao, Kruger Marais, Jennifer Giandhari, Sureshnee Pillay, Houriyah Tegally, Emanuel James San, Tulio de Oliveira, Diana Hardie, Stephen Korsman, Carolyn Williamson                       |
| EPI_ISL_696455                                                                                                                                                                                                                                                                                                                                                                                                                                                                                                                                                                                                                                                                                                                                                                                                                                                                                                                                                                                                                                                                                                                                                                                                                                                                                                                                                                 | Thembaletu CDC wc THC & NHLS/UCT                                                                                                                                     | KRISP, KZN Research Innovation and Sequencing Platform                                                                                                                                                                                                                                                                                                                   | Arash Iranzadeh, Deelan Doolabh, Lynn Tyers, Bruna Galvao, Innocent Mudau, Marvin Hsiao, Kruger Marais, Jennifer Giandhari, Sureshnee Pillay, Houriyah Tegally, Emanuel James San, Tulio de Oliveira, Diana Hardie, Stephen Korsman, Carolyn Williamson                       |
| EPI_ISL_696456                                                                                                                                                                                                                                                                                                                                                                                                                                                                                                                                                                                                                                                                                                                                                                                                                                                                                                                                                                                                                                                                                                                                                                                                                                                                                                                                                                 | Pacaltsdorp Clinic wc PAC & NHLS/UCT                                                                                                                                 | KRISP, KZN Research Innovation and Sequencing Platform                                                                                                                                                                                                                                                                                                                   | Arash Iranzadeh, Deelan Doolabh, Lynn Tyers, Bruna Galvao, Innocent Mudau, Marvin Hsiao, Kruger Marais, Jennifer Giandhari, Sureshnee Pillay, Houriyah Tegally, Emanuel James San, Tulio de Oliveira, Diana Hardie, Stephen Korsman, Carolyn Williamson                       |
| EPI_ISL_696457                                                                                                                                                                                                                                                                                                                                                                                                                                                                                                                                                                                                                                                                                                                                                                                                                                                                                                                                                                                                                                                                                                                                                                                                                                                                                                                                                                 | Hornlee Clinic wc HLC & NHLS/UCT                                                                                                                                     | KRISP, KZN Research Innovation and Sequencing Platform                                                                                                                                                                                                                                                                                                                   | Arash Iranzadeh, Deelan Doolabh, Lynn Tyers, Bruna Galvao, Innocent Mudau, Marvin Hsiao, Kruger Marais, Jennifer Giandhari, Sureshnee Pillay, Houriyah Tegally, Emanuel James San, Tulio de Oliveira, Diana Hardie, Stephen Korsman, Carolyn Williamson                       |
| EPI_ISL_696458                                                                                                                                                                                                                                                                                                                                                                                                                                                                                                                                                                                                                                                                                                                                                                                                                                                                                                                                                                                                                                                                                                                                                                                                                                                                                                                                                                 | George Hospital wc GRH & NHLS/UCT                                                                                                                                    | KRISP, KZN Research Innovation and Sequencing Platform                                                                                                                                                                                                                                                                                                                   | Arash Iranzadeh, Deelan Doolabh, Lynn Tyers, Bruna Galvao, Innocent Mudau, Marvin Hsiao, Kruger Marais, Jennifer Giandhari, Sureshnee Pillay, Houriyah Tegally, Emanuel James San, Tulio de Oliveira, Diana Hardie, Stephen Korsman, Carolyn Williamson                       |
| EPI_ISL_696459                                                                                                                                                                                                                                                                                                                                                                                                                                                                                                                                                                                                                                                                                                                                                                                                                                                                                                                                                                                                                                                                                                                                                                                                                                                                                                                                                                 | Pacaltsdorp Clinic wc PAC & NHLS/UCT                                                                                                                                 | KRISP, KZN Research Innovation and Sequencing Platform                                                                                                                                                                                                                                                                                                                   | Arash Iranzadeh, Deelan Doolabh, Lynn Tyers, Bruna Galvao, Innocent Mudau, Marvin Hsiao, Kruger Marais, Jennifer Giandhari, Sureshnee Pillay, Houriyah Tegally, Emanuel James San, Tulio de Oliveira, Diana Hardie, Stephen Korsman, Carolyn Williamson                       |
| EPI_ISL_696460                                                                                                                                                                                                                                                                                                                                                                                                                                                                                                                                                                                                                                                                                                                                                                                                                                                                                                                                                                                                                                                                                                                                                                                                                                                                                                                                                                 | Kranshoek Clinic wc KSH & NHLS/UCT                                                                                                                                   | KRISP, KZN Research Innovation and Sequencing Platform                                                                                                                                                                                                                                                                                                                   | Arash Iranzadeh, Deelan Doolabh, Lynn Tyers, Bruna Galvao, Innocent Mudau, Marvin Hsiao, Kruger Marais, Jennifer Giandhari, Sureshnee Pillay, Houriyah Tegally, Emanuel James San, Tulio de Oliveira, Diana Hardie, Stephen Korsman, Carolyn Williamson                       |
| EPI_ISL_696461                                                                                                                                                                                                                                                                                                                                                                                                                                                                                                                                                                                                                                                                                                                                                                                                                                                                                                                                                                                                                                                                                                                                                                                                                                                                                                                                                                 | Thembaletu CDC wc THC & NHLS/UCT                                                                                                                                     | KRISP, KZN Research Innovation and Sequencing Platform                                                                                                                                                                                                                                                                                                                   | Arash Iranzadeh, Deelan Doolabh, Lynn Tyers, Bruna Galvao, Innocent Mudau, Marvin Hsiao, Kruger Marais, Jennifer Giandhari, Sureshnee Pillay, Houriyah Tegally, Emanuel James San, Tulio de Oliveira, Diana Hardie, Stephen Korsman, Carolyn Williamson                       |
| EPI_ISL_696462                                                                                                                                                                                                                                                                                                                                                                                                                                                                                                                                                                                                                                                                                                                                                                                                                                                                                                                                                                                                                                                                                                                                                                                                                                                                                                                                                                 | Sedgefield Clinic wc SGE & NHLS/UCT                                                                                                                                  | KRISP, KZN Research Innovation and Sequencing Platform                                                                                                                                                                                                                                                                                                                   | Arash Iranzadeh, Deelan Doolabh, Lynn Tyers, Bruna Galvao, Innocent Mudau, Marvin Hsiao, Kruger Marais, Jennifer Giandhari, Sureshnee Pillay, Houriyah Tegally, Emanuel James San, Tulio de Oliveira, Diana Hardie, Stephen Korsman, Carolyn Williamson                       |
| EPI_ISL_696463                                                                                                                                                                                                                                                                                                                                                                                                                                                                                                                                                                                                                                                                                                                                                                                                                                                                                                                                                                                                                                                                                                                                                                                                                                                                                                                                                                 | Knysna Hospital wc KNY & NHLS/UCT                                                                                                                                    | KRISP, KZN Research Innovation and Sequencing Platform                                                                                                                                                                                                                                                                                                                   | Arash Iranzadeh, Deelan Doolabh, Lynn Tyers, Bruna Galvao, Innocent Mudau, Marvin Hsiao, Kruger Marais, Jennifer Giandhari, Sureshnee Pillay, Houriyah Tegally, Emanuel James San, Tulio de Oliveira, Diana Hardie, Stephen Korsman, Carolyn Williamson                       |



|                                                                                |                                                                                                                                                                       |                                                                                                                                                                                                                                                                                                                                                                          |                                                                                                                                                                                                                                                                               |
|--------------------------------------------------------------------------------|-----------------------------------------------------------------------------------------------------------------------------------------------------------------------|--------------------------------------------------------------------------------------------------------------------------------------------------------------------------------------------------------------------------------------------------------------------------------------------------------------------------------------------------------------------------|-------------------------------------------------------------------------------------------------------------------------------------------------------------------------------------------------------------------------------------------------------------------------------|
| EPI_ISL_696503                                                                 | George Hospital wc GRH & NHL/UCT                                                                                                                                      | KRISP, KZN Research Innovation and Sequencing Platform                                                                                                                                                                                                                                                                                                                   | Houriyah Tegally, Emanuel James San, Tulio de Oliveira, Diana Hardie, Stephen Korsman, Carolyn Williamson                                                                                                                                                                     |
| EPI_ISL_696504                                                                 | Pacaltsdorp Clinic wc PAC & NHL/UCT                                                                                                                                   | KRISP, KZN Research Innovation and Sequencing Platform                                                                                                                                                                                                                                                                                                                   | Arash Iranzadeh, Deelan Doolabh, Lynn Tyers, Bruna Galvao, Innocent Mudau, Marvin Hsiao, Kruger Marais, Jennifer Giandhari, Sureshnee Pillay, Houriyah Tegally, Emanuel James San, Tulio de Oliveira, Diana Hardie, Stephen Korsman, Carolyn Williamson                       |
| EPI_ISL_696505                                                                 | Khayeletu Clinic wc KLC & NHL/UCT                                                                                                                                     | KRISP, KZN Research Innovation and Sequencing Platform                                                                                                                                                                                                                                                                                                                   | Arash Iranzadeh, Deelan Doolabh, Lynn Tyers, Bruna Galvao, Innocent Mudau, Marvin Hsiao, Kruger Marais, Jennifer Giandhari, Sureshnee Pillay, Houriyah Tegally, Emanuel James San, Tulio de Oliveira, Diana Hardie, Stephen Korsman, Carolyn Williamson                       |
| EPI_ISL_696506                                                                 | Knysna CDC wc WLC & NHL/UCT                                                                                                                                           | KRISP, KZN Research Innovation and Sequencing Platform                                                                                                                                                                                                                                                                                                                   | Arash Iranzadeh, Deelan Doolabh, Lynn Tyers, Bruna Galvao, Innocent Mudau, Marvin Hsiao, Kruger Marais, Jennifer Giandhari, Sureshnee Pillay, Houriyah Tegally, Emanuel James San, Tulio de Oliveira, Diana Hardie, Stephen Korsman, Carolyn Williamson                       |
| EPI_ISL_696507                                                                 | Great Brak River Clinic wc GBC & NHL/UCT                                                                                                                              | KRISP, KZN Research Innovation and Sequencing Platform                                                                                                                                                                                                                                                                                                                   | Arash Iranzadeh, Deelan Doolabh, Lynn Tyers, Bruna Galvao, Innocent Mudau, Marvin Hsiao, Kruger Marais, Jennifer Giandhari, Sureshnee Pillay, Houriyah Tegally, Emanuel James San, Tulio de Oliveira, Diana Hardie, Stephen Korsman, Carolyn Williamson                       |
| EPI_ISL_696508, EPI_ISL_696509                                                 | Conville CDC wc CVC & NHL/UCT                                                                                                                                         | KRISP, KZN Research Innovation and Sequencing Platform                                                                                                                                                                                                                                                                                                                   | Arash Iranzadeh, Deelan Doolabh, Lynn Tyers, Bruna Galvao, Innocent Mudau, Marvin Hsiao, Kruger Marais, Jennifer Giandhari, Sureshnee Pillay, Houriyah Tegally, Emanuel James San, Tulio de Oliveira, Diana Hardie, Stephen Korsman, Carolyn Williamson                       |
| EPI_ISL_696510                                                                 | Sedgefield Clinic wc SGE & NHL/UCT                                                                                                                                    | KRISP, KZN Research Innovation and Sequencing Platform                                                                                                                                                                                                                                                                                                                   | Arash Iranzadeh, Deelan Doolabh, Lynn Tyers, Bruna Galvao, Innocent Mudau, Marvin Hsiao, Kruger Marais, Jennifer Giandhari, Sureshnee Pillay, Houriyah Tegally, Emanuel James San, Tulio de Oliveira, Diana Hardie, Stephen Korsman, Carolyn Williamson                       |
| EPI_ISL_696511                                                                 | Keurhoek Clinic wc KTT & NHL/UCT                                                                                                                                      | KRISP, KZN Research Innovation and Sequencing Platform                                                                                                                                                                                                                                                                                                                   | Arash Iranzadeh, Deelan Doolabh, Lynn Tyers, Bruna Galvao, Innocent Mudau, Marvin Hsiao, Kruger Marais, Jennifer Giandhari, Sureshnee Pillay, Houriyah Tegally, Emanuel James San, Tulio de Oliveira, Diana Hardie, Stephen Korsman, Carolyn Williamson                       |
| EPI_ISL_696512                                                                 | Conville CDC wc CVC & NHL/UCT                                                                                                                                         | KRISP, KZN Research Innovation and Sequencing Platform                                                                                                                                                                                                                                                                                                                   | Arash Iranzadeh, Deelan Doolabh, Lynn Tyers, Bruna Galvao, Innocent Mudau, Marvin Hsiao, Kruger Marais, Jennifer Giandhari, Sureshnee Pillay, Houriyah Tegally, Emanuel James San, Tulio de Oliveira, Diana Hardie, Stephen Korsman, Carolyn Williamson                       |
| EPI_ISL_696513                                                                 | Pacaltsdorp Clinic wc PAC & NHL/UCT                                                                                                                                   | KRISP, KZN Research Innovation and Sequencing Platform                                                                                                                                                                                                                                                                                                                   | Arash Iranzadeh, Deelan Doolabh, Lynn Tyers, Bruna Galvao, Innocent Mudau, Marvin Hsiao, Kruger Marais, Jennifer Giandhari, Sureshnee Pillay, Houriyah Tegally, Emanuel James San, Tulio de Oliveira, Diana Hardie, Stephen Korsman, Carolyn Williamson                       |
| EPI_ISL_696514, EPI_ISL_696515, EPI_ISL_696516, EPI_ISL_696517, EPI_ISL_696518 | Sedgefield Clinic wc SGE & NHL/UCT                                                                                                                                    | KRISP, KZN Research Innovation and Sequencing Platform                                                                                                                                                                                                                                                                                                                   | Arash Iranzadeh, Deelan Doolabh, Lynn Tyers, Bruna Galvao, Innocent Mudau, Marvin Hsiao, Kruger Marais, Jennifer Giandhari, Sureshnee Pillay, Houriyah Tegally, Emanuel James San, Tulio de Oliveira, Diana Hardie, Stephen Korsman, Carolyn Williamson                       |
| EPI_ISL_696519, EPI_ISL_696520                                                 | Thembaletu CDC wc THC & NHL/UCT                                                                                                                                       | KRISP, KZN Research Innovation and Sequencing Platform                                                                                                                                                                                                                                                                                                                   | Arash Iranzadeh, Deelan Doolabh, Lynn Tyers, Bruna Galvao, Innocent Mudau, Marvin Hsiao, Kruger Marais, Jennifer Giandhari, Sureshnee Pillay, Houriyah Tegally, Emanuel James San, Tulio de Oliveira, Diana Hardie, Stephen Korsman, Carolyn Williamson                       |
| EPI_ISL_696521                                                                 | Thembaletu CDC wc THC & NHL/UC                                                                                                                                        | KRISP, KZN Research Innovation and Sequencing Platform                                                                                                                                                                                                                                                                                                                   | Arash Iranzadeh, Deelan Doolabh, Lynn Tyers, Bruna Galvao, Innocent Mudau, Marvin Hsiao, Kruger Marais, Jennifer Giandhari, Sureshnee Pillay, Houriyah Tegally, Emanuel James San, Tulio de Oliveira, Diana Hardie, Stephen Korsman, Carolyn Williamson                       |
| EPI_ISL_699655, EPI_ISL_699656, EPI_ISL_699657                                 | 1-Laboratory of Microbiology, National Reference Lab, Charles Nicolle Hospital; 2-University of Tunis ElManar, Faculty of Medicine of Tunis, LR99ES09, Tunis, Tunisia | 1-Clinical and Experimental Pharmacology Lab, LR16SP02, National Center of Pharmacovigilance, University of Tunis El Manar, Tunis, Tunisia. 2-Neurodegenerative diseases and psychiatric troubles, LR18SP03, Razi Hospital, University of Tunis El Manar, Tunis, Tunisia. 3- Ministry of Health, National Observatory of New and Emerging Diseases, 1006, Tunis, Tunisia | Ilhem Boutiba-Ben Boubaker, Sameh Trabelsi, Nissaf Ben Alaya, Maher Kharrat, Alia Ben Kahla, Jalila Ben Kheili, Salma Abid, Sana Ferjani, Asma Ferjani, Mouna Ben Sassi, Mouna Safer, Guedi Berrabeh, Salwa Mrabet, Hanen ElJebari, Gaies Emma, Riadh Daghfous, Riadh Gouider |
| EPI_ISL_700411                                                                 | Hanover Park CHC wc HPH                                                                                                                                               | NHL/UCT                                                                                                                                                                                                                                                                                                                                                                  | Arash Iranzadeh, Deelan Doolabh, Lynn Tyers, Bruna Galvao, Innocent Mudau, Marvin Hsiao, Kruger Marais, Diana Hardie, Stephen Korsman, Carolyn Williamson                                                                                                                     |
| EPI_ISL_700412                                                                 | Heideveld CDC wc HVP                                                                                                                                                  | NHL/UCT                                                                                                                                                                                                                                                                                                                                                                  | Arash Iranzadeh, Deelan Doolabh, Lynn Tyers, Bruna Galvao, Innocent Mudau, Marvin Hsiao, Kruger Marais, Diana Hardie, Stephen Korsman, Carolyn Williamson                                                                                                                     |
| EPI_ISL_700413                                                                 | Vanguard CHC wc VGC                                                                                                                                                   | NHL/UCT                                                                                                                                                                                                                                                                                                                                                                  | Arash Iranzadeh, Deelan Doolabh, Lynn Tyers, Bruna Galvao, Innocent Mudau, Marvin Hsiao, Kruger Marais, Diana Hardie, Stephen Korsman, Carolyn Williamson                                                                                                                     |
| EPI_ISL_700414                                                                 | Conville CDC wc CVC                                                                                                                                                   | NHL/UCT                                                                                                                                                                                                                                                                                                                                                                  | Arash Iranzadeh, Deelan Doolabh, Lynn Tyers, Bruna Galvao, Innocent Mudau, Marvin Hsiao, Kruger Marais, Diana Hardie, Stephen Korsman, Carolyn Williamson                                                                                                                     |
| EPI_ISL_700415                                                                 | Guguletu CHC wc GDH                                                                                                                                                   | NHL/UCT                                                                                                                                                                                                                                                                                                                                                                  | Arash Iranzadeh, Deelan Doolabh, Lynn Tyers, Bruna Galvao, Innocent Mudau, Marvin Hsiao, Kruger Marais, Diana Hardie, Stephen Korsman, Carolyn Williamson                                                                                                                     |
| EPI_ISL_700416                                                                 | Zoar Clinic wc ZOA                                                                                                                                                    | NHL/UCT                                                                                                                                                                                                                                                                                                                                                                  | Arash Iranzadeh, Deelan Doolabh, Lynn Tyers, Bruna Galvao, Innocent Mudau, Marvin Hsiao, Kruger Marais, Diana Hardie, Stephen Korsman, Carolyn Williamson                                                                                                                     |
| EPI_ISL_700417                                                                 | Oudtshoorn Hospital wc OUD                                                                                                                                            | NHL/UCT                                                                                                                                                                                                                                                                                                                                                                  | Arash Iranzadeh, Deelan Doolabh, Lynn Tyers, Bruna Galvao, Innocent Mudau, Marvin Hsiao, Kruger Marais, Diana Hardie, Stephen Korsman, Carolyn Williamson                                                                                                                     |
| EPI_ISL_700418                                                                 | Hanover Park CHC wc HPH                                                                                                                                               | NHL/UCT                                                                                                                                                                                                                                                                                                                                                                  | Arash Iranzadeh, Deelan Doolabh, Lynn Tyers, Bruna Galvao, Innocent Mudau, Marvin Hsiao, Kruger Marais, Diana Hardie, Stephen Korsman, Carolyn Williamson                                                                                                                     |
| EPI_ISL_700419                                                                 | Knysna Hospital wc KNY                                                                                                                                                | NHL/UCT                                                                                                                                                                                                                                                                                                                                                                  | Houriyah Tegally, Arash Iranzadeh, Deelan Doolabh, Lynn Tyers, Bruna Galvao, Innocent Mudau, Marvin Hsiao, Kruger Marais, Diana Hardie, Stephen Korsman, Carolyn Williamson                                                                                                   |
| EPI_ISL_700420                                                                 | D'Almeida Clinic wc DAL                                                                                                                                               | NHL/UCT                                                                                                                                                                                                                                                                                                                                                                  | Houriyah Tegally, Arash Iranzadeh, Deelan Doolabh, Lynn Tyers, Bruna Galvao, Innocent Mudau, Marvin Hsiao, Kruger Marais, Diana Hardie, Stephen Korsman, Carolyn Williamson                                                                                                   |
| EPI_ISL_700421                                                                 | Victoria Hospital wc VHW                                                                                                                                              | NHL/UCT                                                                                                                                                                                                                                                                                                                                                                  | Arash Iranzadeh, Deelan Doolabh, Lynn Tyers, Bruna Galvao, Innocent Mudau, Marvin Hsiao, Kruger Marais, Diana Hardie, Stephen Korsman, Carolyn Williamson                                                                                                                     |
| EPI_ISL_700422                                                                 | Knysna Hospital wc KNY                                                                                                                                                | NHL/UCT                                                                                                                                                                                                                                                                                                                                                                  | Houriyah Tegally, Arash Iranzadeh, Deelan Doolabh, Lynn Tyers, Bruna Galvao, Innocent Mudau, Marvin Hsiao, Kruger Marais, Diana Hardie, Stephen Korsman, Carolyn Williamson                                                                                                   |
| EPI_ISL_700423                                                                 | Khayeletu Clinic wc KLC                                                                                                                                               | NHL/UCT                                                                                                                                                                                                                                                                                                                                                                  | Houriyah Tegally, Arash Iranzadeh, Deelan Doolabh, Lynn Tyers, Bruna Galvao, Innocent Mudau, Marvin Hsiao, Kruger Marais, Diana Hardie, Stephen Korsman, Carolyn Williamson                                                                                                   |
| EPI_ISL_700424, EPI_ISL_700425                                                 | Thembaletu CDC wc THC                                                                                                                                                 | NHL/UCT                                                                                                                                                                                                                                                                                                                                                                  | Houriyah Tegally, Arash Iranzadeh, Deelan Doolabh, Lynn Tyers, Bruna Galvao, Innocent Mudau, Marvin Hsiao, Kruger Marais, Diana Hardie, Stephen Korsman, Carolyn Williamson                                                                                                   |
| EPI_ISL_700426                                                                 | Knysna Hospital wc KNY                                                                                                                                                | NHL/UCT                                                                                                                                                                                                                                                                                                                                                                  | Houriyah Tegally, Arash Iranzadeh, Deelan Doolabh, Lynn Tyers, Bruna Galvao, Innocent Mudau, Marvin Hsiao, Kruger Marais, Diana Hardie, Stephen Korsman, Carolyn Williamson                                                                                                   |
| EPI_ISL_700427                                                                 | D'Almeida Clinic wc DAL                                                                                                                                               | NHL/UCT                                                                                                                                                                                                                                                                                                                                                                  | Houriyah Tegally, Arash Iranzadeh, Deelan Doolabh, Lynn Tyers, Bruna Galvao, Innocent Mudau, Marvin Hsiao, Kruger Marais, Diana Hardie, Stephen Korsman, Carolyn Williamson                                                                                                   |
| EPI_ISL_700428                                                                 | Thembaletu CDC wc THC                                                                                                                                                 | NHL/UCT                                                                                                                                                                                                                                                                                                                                                                  | Houriyah Tegally, Arash Iranzadeh, Deelan Doolabh, Lynn Tyers, Bruna Galvao, Innocent Mudau, Marvin Hsiao, Kruger Marais, Diana Hardie, Stephen Korsman, Carolyn Williamson                                                                                                   |
| EPI_ISL_700429                                                                 | Knysna Hospital wc KNY                                                                                                                                                | NHL/UCT                                                                                                                                                                                                                                                                                                                                                                  | Houriyah Tegally, Arash Iranzadeh, Deelan Doolabh, Lynn Tyers, Bruna Galvao, Innocent Mudau, Marvin Hsiao, Kruger Marais, Diana Hardie, Stephen Korsman, Carolyn Williamson                                                                                                   |









|                                                                                                                                                |                                                                                                                                                                      |                                                                                                                                                                                                                                                                                                                                                                          |                                                                                                                                                                                                                                                                                                                                 |
|------------------------------------------------------------------------------------------------------------------------------------------------|----------------------------------------------------------------------------------------------------------------------------------------------------------------------|--------------------------------------------------------------------------------------------------------------------------------------------------------------------------------------------------------------------------------------------------------------------------------------------------------------------------------------------------------------------------|---------------------------------------------------------------------------------------------------------------------------------------------------------------------------------------------------------------------------------------------------------------------------------------------------------------------------------|
| EPI_ISL_700578                                                                                                                                 | Guguletu CHC wc GDH                                                                                                                                                  | NHLS/UCT                                                                                                                                                                                                                                                                                                                                                                 | Arash Iranzadeh, Deelan Doolabh, Lynn Tyers, Bruna Galvao, Innocent Mudau, Marvin Hsiao, Kruger Marais, Diana Hardie, Stephen Korsman, Carolyn Williamson                                                                                                                                                                       |
| EPI_ISL_700579                                                                                                                                 | Kwanokuthula CDC wc KWA                                                                                                                                              | NHLS/UCT                                                                                                                                                                                                                                                                                                                                                                 | Houriayah Tegally, Arash Iranzadeh, Deelan Doolabh, Lynn Tyers, Bruna Galvao, Innocent Mudau, Marvin Hsiao, Kruger Marais, Diana Hardie, Stephen Korsman, Carolyn Williamson                                                                                                                                                    |
| EPI_ISL_700580                                                                                                                                 | Nyanga CDC wc NGC                                                                                                                                                    | NHLS/UCT                                                                                                                                                                                                                                                                                                                                                                 | Arash Iranzadeh, Deelan Doolabh, Lynn Tyers, Bruna Galvao, Innocent Mudau, Marvin Hsiao, Kruger Marais, Diana Hardie, Stephen Korsman, Carolyn Williamson                                                                                                                                                                       |
| EPI_ISL_700581                                                                                                                                 | Conville CDC wc CVC                                                                                                                                                  | NHLS/UCT                                                                                                                                                                                                                                                                                                                                                                 | Houriayah Tegally, Arash Iranzadeh, Deelan Doolabh, Lynn Tyers, Bruna Galvao, Innocent Mudau, Marvin Hsiao, Kruger Marais, Diana Hardie, Stephen Korsman, Carolyn Williamson                                                                                                                                                    |
| EPI_ISL_700582                                                                                                                                 | Dr Abdurahman CDC wc DAC                                                                                                                                             | NHLS/UCT                                                                                                                                                                                                                                                                                                                                                                 | Arash Iranzadeh, Deelan Doolabh, Lynn Tyers, Bruna Galvao, Innocent Mudau, Marvin Hsiao, Kruger Marais, Diana Hardie, Stephen Korsman, Carolyn Williamson                                                                                                                                                                       |
| EPI_ISL_700583                                                                                                                                 | Knysna Hospital wc KNY                                                                                                                                               | NHLS/UCT                                                                                                                                                                                                                                                                                                                                                                 | Arash Iranzadeh, Deelan Doolabh, Lynn Tyers, Bruna Galvao, Innocent Mudau, Marvin Hsiao, Kruger Marais, Diana Hardie, Stephen Korsman, Carolyn Williamson                                                                                                                                                                       |
| EPI_ISL_700584                                                                                                                                 | Heideveld Emergency Centre                                                                                                                                           | NHLS/UCT                                                                                                                                                                                                                                                                                                                                                                 | Arash Iranzadeh, Deelan Doolabh, Lynn Tyers, Bruna Galvao, Innocent Mudau, Marvin Hsiao, Kruger Marais, Diana Hardie, Stephen Korsman, Carolyn Williamson                                                                                                                                                                       |
| EPI_ISL_700585                                                                                                                                 | Hanover Park CHC wc HPH                                                                                                                                              | NHLS/UCT                                                                                                                                                                                                                                                                                                                                                                 | Arash Iranzadeh, Deelan Doolabh, Lynn Tyers, Bruna Galvao, Innocent Mudau, Marvin Hsiao, Kruger Marais, Diana Hardie, Stephen Korsman, Carolyn Williamson                                                                                                                                                                       |
| EPI_ISL_700586                                                                                                                                 | Pacaltsdorp Clinic wc PAC                                                                                                                                            | NHLS/UCT                                                                                                                                                                                                                                                                                                                                                                 | Arash Iranzadeh, Deelan Doolabh, Lynn Tyers, Bruna Galvao, Innocent Mudau, Marvin Hsiao, Kruger Marais, Diana Hardie, Stephen Korsman, Carolyn Williamson                                                                                                                                                                       |
| EPI_ISL_700587                                                                                                                                 | Conville CDC wc CVC                                                                                                                                                  | NHLS/UCT                                                                                                                                                                                                                                                                                                                                                                 | Houriayah Tegally, Arash Iranzadeh, Deelan Doolabh, Lynn Tyers, Bruna Galvao, Innocent Mudau, Marvin Hsiao, Kruger Marais, Diana Hardie, Stephen Korsman, Carolyn Williamson                                                                                                                                                    |
| EPI_ISL_700588                                                                                                                                 | Sedgefield Clinic wc SGE                                                                                                                                             | NHLS/UCT                                                                                                                                                                                                                                                                                                                                                                 | Arash Iranzadeh, Deelan Doolabh, Lynn Tyers, Bruna Galvao, Innocent Mudau, Marvin Hsiao, Kruger Marais, Diana Hardie, Stephen Korsman, Carolyn Williamson                                                                                                                                                                       |
| EPI_ISL_700589                                                                                                                                 | Bongolethu Clinic wc BLC                                                                                                                                             | NHLS/UCT                                                                                                                                                                                                                                                                                                                                                                 | Houriayah Tegally, Arash Iranzadeh, Deelan Doolabh, Lynn Tyers, Bruna Galvao, Innocent Mudau, Marvin Hsiao, Kruger Marais, Diana Hardie, Stephen Korsman, Carolyn Williamson                                                                                                                                                    |
| EPI_ISL_700590                                                                                                                                 | Conville CDC wc CVC                                                                                                                                                  | NHLS/UCT                                                                                                                                                                                                                                                                                                                                                                 | Houriayah Tegally, Arash Iranzadeh, Deelan Doolabh, Lynn Tyers, Bruna Galvao, Innocent Mudau, Marvin Hsiao, Kruger Marais, Diana Hardie, Stephen Korsman, Carolyn Williamson                                                                                                                                                    |
| EPI_ISL_700591, EPI_ISL_700592                                                                                                                 | Dr Abdurahman CDC wc DAC                                                                                                                                             | NHLS/UCT                                                                                                                                                                                                                                                                                                                                                                 | Arash Iranzadeh, Deelan Doolabh, Lynn Tyers, Bruna Galvao, Innocent Mudau, Marvin Hsiao, Kruger Marais, Diana Hardie, Stephen Korsman, Carolyn Williamson                                                                                                                                                                       |
| EPI_ISL_700593                                                                                                                                 | Hanover Park CHC wc HPH                                                                                                                                              | NHLS/UCT                                                                                                                                                                                                                                                                                                                                                                 | Arash Iranzadeh, Deelan Doolabh, Lynn Tyers, Bruna Galvao, Innocent Mudau, Marvin Hsiao, Kruger Marais, Diana Hardie, Stephen Korsman, Carolyn Williamson                                                                                                                                                                       |
| EPI_ISL_700594                                                                                                                                 | Oudtshoorn Hospital wc OUD                                                                                                                                           | NHLS/UCT                                                                                                                                                                                                                                                                                                                                                                 | Arash Iranzadeh, Deelan Doolabh, Lynn Tyers, Bruna Galvao, Innocent Mudau, Marvin Hsiao, Kruger Marais, Diana Hardie, Stephen Korsman, Carolyn Williamson                                                                                                                                                                       |
| EPI_ISL_700595                                                                                                                                 | Heideveld Emergency Centre                                                                                                                                           | NHLS/UCT                                                                                                                                                                                                                                                                                                                                                                 | Arash Iranzadeh, Deelan Doolabh, Lynn Tyers, Bruna Galvao, Innocent Mudau, Marvin Hsiao, Kruger Marais, Diana Hardie, Stephen Korsman, Carolyn Williamson                                                                                                                                                                       |
| EPI_ISL_700596                                                                                                                                 | Victoria Hospital wc VHW                                                                                                                                             | NHLS/UCT                                                                                                                                                                                                                                                                                                                                                                 | Arash Iranzadeh, Deelan Doolabh, Lynn Tyers, Bruna Galvao, Innocent Mudau, Marvin Hsiao, Kruger Marais, Diana Hardie, Stephen Korsman, Carolyn Williamson                                                                                                                                                                       |
| EPI_ISL_700597                                                                                                                                 | Mitchells Plain Hospital wc MPH                                                                                                                                      | NHLS/UCT                                                                                                                                                                                                                                                                                                                                                                 | Arash Iranzadeh, Deelan Doolabh, Lynn Tyers, Bruna Galvao, Innocent Mudau, Marvin Hsiao, Kruger Marais, Diana Hardie, Stephen Korsman, Carolyn Williamson                                                                                                                                                                       |
| EPI_ISL_700598                                                                                                                                 | Heideveld Emergency Centre                                                                                                                                           | NHLS/UCT                                                                                                                                                                                                                                                                                                                                                                 | Arash Iranzadeh, Deelan Doolabh, Lynn Tyers, Bruna Galvao, Innocent Mudau, Marvin Hsiao, Kruger Marais, Diana Hardie, Stephen Korsman, Carolyn Williamson                                                                                                                                                                       |
| EPI_ISL_700599                                                                                                                                 | Conville CDC wc CVC                                                                                                                                                  | NHLS/UCT                                                                                                                                                                                                                                                                                                                                                                 | Arash Iranzadeh, Deelan Doolabh, Lynn Tyers, Bruna Galvao, Innocent Mudau, Marvin Hsiao, Kruger Marais, Diana Hardie, Stephen Korsman, Carolyn Williamson                                                                                                                                                                       |
| EPI_ISL_707697, EPI_ISL_707698, EPI_ISL_707699, EPI_ISL_707700                                                                                 | 1-Laboratory of Microbiology, National Reference Lab, Charles Nicole Hospital; 2-University of Tunis ElManar, Faculty of Medicine of Tunis, LR99ES09, Tunis, Tunisia | 1-Clinical and Experimental Pharmacology Lab, LR16SP02, National Center of Pharmacovigilance, University of Tunis El Manar, Tunis, Tunisia. 2-Neurodegenerative diseases and psychiatric troubles, LR18SP03, Razi Hospital, University of Tunis El Manar, Tunis, Tunisia. 3- Ministry of Health, National Observatory of New and Emerging Diseases, 1006, Tunis, Tunisia | Ilhem Boutiba-Ben Boubaker, Sameh Trabelsi, Nissaf Ben Alaya, Maher Kharrat, Alia Ben Kahla, Jalila Ben Kheilil, Salma Abid, Sana Ferjani, Mouna Ben Sassi, Mouna Safer, Zaineb Hamzaoui, Habiba Ben Romdhane, Souissi Amira, Rouaa Ben Othman, Hanen El Jebari, Asma Ferjani, Gales Emna, Riadh Daghtous, Riadh Gouider.       |
| EPI_ISL_707711, EPI_ISL_707712, EPI_ISL_707713, EPI_ISL_707771, EPI_ISL_707772, EPI_ISL_707773, EPI_ISL_707774, EPI_ISL_707776, EPI_ISL_707777 | Rwanda National Reference Laboratory                                                                                                                                 | Rwanda National Reference Laboratory                                                                                                                                                                                                                                                                                                                                     | Enatha Mukantwari, Jeanne d'Arc Umuringa                                                                                                                                                                                                                                                                                        |
| EPI_ISL_707779                                                                                                                                 | Rwanda National Reference Laboratory                                                                                                                                 | Rwanda National Reference Laboratory                                                                                                                                                                                                                                                                                                                                     | Enatha Mukantwari, Jeanne d'Arc Umuringa                                                                                                                                                                                                                                                                                        |
| EPI_ISL_707780                                                                                                                                 | Rwanda National Reference Laboratory                                                                                                                                 | Rwanda National Reference Laboratory                                                                                                                                                                                                                                                                                                                                     | Enatha Mukantwari, Jeanne d'Arc Umuringa                                                                                                                                                                                                                                                                                        |
| EPI_ISL_707783                                                                                                                                 | Rwanda National Reference Laboratory                                                                                                                                 | Rwanda National Reference Laboratory                                                                                                                                                                                                                                                                                                                                     | ENatha MUKantwari, Jeanne d'Arc Mukantwari                                                                                                                                                                                                                                                                                      |
| EPI_ISL_707787, EPI_ISL_707788                                                                                                                 | Rwanda National Reference Laboratory                                                                                                                                 | Rwanda National Reference Laboratory                                                                                                                                                                                                                                                                                                                                     | Enatha Mukantwari, Jeanne d'Arc Umuringa                                                                                                                                                                                                                                                                                        |
| EPI_ISL_707789                                                                                                                                 | Rwanda National Reference Laboratory                                                                                                                                 | Rwanda National Reference Laboratory                                                                                                                                                                                                                                                                                                                                     | Enatha Mukantwari, Jeanne d'Arc                                                                                                                                                                                                                                                                                                 |
| EPI_ISL_707790                                                                                                                                 | Rwanda National Reference Laboratory                                                                                                                                 | Rwanda National Reference Laboratory                                                                                                                                                                                                                                                                                                                                     | Enatha Mukantwari, Jeanne d'Arc Umuringa                                                                                                                                                                                                                                                                                        |
| EPI_ISL_707791, EPI_ISL_707792, EPI_ISL_707793                                                                                                 | 1-Laboratory of Microbiology, National Reference Lab, Charles Nicole Hospital; 2-University of Tunis ElManar, Faculty of Medicine of Tunis, LR99ES09, Tunis, Tunisia | 1-Clinical and Experimental Pharmacology Lab, LR16SP02, National Center of Pharmacovigilance, University of Tunis El Manar, Tunis, Tunisia. 2-Neurodegenerative diseases and psychiatric troubles, LR18SP03, Razi Hospital, University of Tunis El Manar, Tunis, Tunisia. 3- Ministry of Health, National Observatory of New and Emerging Diseases, 1006, Tunis, Tunisia | Ilhem Boutiba-Ben Boubaker, Sameh Trabelsi, Nissaf Ben Alaya, Maher Kharrat, Alia Ben Kahla, Jalila Ben Kheilil, Salma Abid, Sana Ferjani, Mouna Ben Sassi, Mouna Safer, Awatef El MOussi, Habiba Ben Romdhane, Souissi Amira, Ines Mdimi, Hanen El Jebari, Asma Ferjani, Gales Emna, Riadh Daghtous, Riadh Gouider.            |
| EPI_ISL_710532, EPI_ISL_710534, EPI_ISL_710537, EPI_ISL_710540, EPI_ISL_710541, EPI_ISL_710575, EPI_ISL_711057, EPI_ISL_712060                 | Hôpital Fattouma-Bourguiba de Monastir                                                                                                                               | Laboratoire des Procédés de Criblage Moléculaire et Cellulaire-Centre de Biotechnologie de Sfax                                                                                                                                                                                                                                                                          | Souissi, A., Abid, N., Ben Ayed, I., Gargouri, S., Abdelmoulah, F., Elargoubi, A., Smeti, I., Bensaid, M., Stambouli, N., Kharat, N., Ajili, F., Fki-berrajah, L., Mhalla, S., Chtourou, A., Gaaloul, I., Nabili, A., Turki, M., Aouni, M., Hammami, A., Mastouri, M., Karray Hakim, H., Kamoun, S., Rebai, A. and Masmoudi, S. |
| EPI_ISL_712062, EPI_ISL_712063,                                                                                                                | Laboratoire de Microbiologie- CHU Habib Bourguiba - Sfax                                                                                                             | Laboratoire des Procédés de Criblage Moléculaire et                                                                                                                                                                                                                                                                                                                      | Souissi, A., Abid, N., Ben Ayed, I., Gargouri, S., Abdelmoulah, F., Elargoubi, A., Smeti, I., Bensaid, M., Stambouli, N., Kharat, N., Ajili, F., Fki-berrajah, L.,                                                                                                                                                              |



|                                                                                                                                                                                                                                                                                                                                                                                                                                                                                                                                                                                                                                                                                                                                                                                                                                                                                                                                                                                                                                                                                                                                                                                                                                                                                                                                                                                                                                                                                                                                                                                                                                                                                                                                                                                                                                                                                                                                                                                                                                                                                                |                                                                                                                                                                       |                                                                                                                                                                                                                                                                                                                                                                          |                                                                                                                                                                                                                                                                                                                       |                                                                                                                                                                                                  |
|------------------------------------------------------------------------------------------------------------------------------------------------------------------------------------------------------------------------------------------------------------------------------------------------------------------------------------------------------------------------------------------------------------------------------------------------------------------------------------------------------------------------------------------------------------------------------------------------------------------------------------------------------------------------------------------------------------------------------------------------------------------------------------------------------------------------------------------------------------------------------------------------------------------------------------------------------------------------------------------------------------------------------------------------------------------------------------------------------------------------------------------------------------------------------------------------------------------------------------------------------------------------------------------------------------------------------------------------------------------------------------------------------------------------------------------------------------------------------------------------------------------------------------------------------------------------------------------------------------------------------------------------------------------------------------------------------------------------------------------------------------------------------------------------------------------------------------------------------------------------------------------------------------------------------------------------------------------------------------------------------------------------------------------------------------------------------------------------|-----------------------------------------------------------------------------------------------------------------------------------------------------------------------|--------------------------------------------------------------------------------------------------------------------------------------------------------------------------------------------------------------------------------------------------------------------------------------------------------------------------------------------------------------------------|-----------------------------------------------------------------------------------------------------------------------------------------------------------------------------------------------------------------------------------------------------------------------------------------------------------------------|--------------------------------------------------------------------------------------------------------------------------------------------------------------------------------------------------|
| EPI_ISL_712064, EPI_ISL_712065, EPI_ISL_712066, EPI_ISL_712067, EPI_ISL_712068, EPI_ISL_712069                                                                                                                                                                                                                                                                                                                                                                                                                                                                                                                                                                                                                                                                                                                                                                                                                                                                                                                                                                                                                                                                                                                                                                                                                                                                                                                                                                                                                                                                                                                                                                                                                                                                                                                                                                                                                                                                                                                                                                                                 | adresse                                                                                                                                                               | Cellulaire-Centre de Biotechnologie de Sfax                                                                                                                                                                                                                                                                                                                              | Mhalla,S., Chtourou,A., Gaaloul,I., Nabili,A., Turki,M., Aouni,M., Hammami,A., Mastouri,M., Karray Hakim,H., Kamoun,S., Rebai,A. and Masmoudi,S.                                                                                                                                                                      |                                                                                                                                                                                                  |
| EPI_ISL_712070, EPI_ISL_712071, EPI_ISL_712072, EPI_ISL_712073, EPI_ISL_712074, EPI_ISL_712075, EPI_ISL_712076                                                                                                                                                                                                                                                                                                                                                                                                                                                                                                                                                                                                                                                                                                                                                                                                                                                                                                                                                                                                                                                                                                                                                                                                                                                                                                                                                                                                                                                                                                                                                                                                                                                                                                                                                                                                                                                                                                                                                                                 | Port Elizabeth Provincial Hospital, National Health Laboratory Services, Eastern Cape, South Africa                                                                   | National Institute for Communicable Diseases of the National Health Laboratory Service                                                                                                                                                                                                                                                                                   | Mohale T, Ntuli N, Mahlangu B, Allam M, Ismail A, Bhiman JN                                                                                                                                                                                                                                                           |                                                                                                                                                                                                  |
| EPI_ISL_712077, EPI_ISL_712078                                                                                                                                                                                                                                                                                                                                                                                                                                                                                                                                                                                                                                                                                                                                                                                                                                                                                                                                                                                                                                                                                                                                                                                                                                                                                                                                                                                                                                                                                                                                                                                                                                                                                                                                                                                                                                                                                                                                                                                                                                                                 | East London NHLS Laboratory, Eastern Cape, South Africa                                                                                                               | National Institute for Communicable Diseases of the National Health Laboratory Service                                                                                                                                                                                                                                                                                   | Mohale T, Ntuli N, Mahlangu B, Allam M, Ismail A, Bhiman JN                                                                                                                                                                                                                                                           |                                                                                                                                                                                                  |
| EPI_ISL_712079, EPI_ISL_712080, EPI_ISL_712081, EPI_ISL_712082, EPI_ISL_712083, EPI_ISL_712084, EPI_ISL_712085, EPI_ISL_712086, EPI_ISL_712087, EPI_ISL_712088, EPI_ISL_712089, EPI_ISL_712090, EPI_ISL_712091                                                                                                                                                                                                                                                                                                                                                                                                                                                                                                                                                                                                                                                                                                                                                                                                                                                                                                                                                                                                                                                                                                                                                                                                                                                                                                                                                                                                                                                                                                                                                                                                                                                                                                                                                                                                                                                                                 | see above                                                                                                                                                             | Port Elizabeth Provincial Hospital, National Health Laboratory Services, Eastern Cape, South Africa                                                                                                                                                                                                                                                                      | National Institute for Communicable Diseases of the National Health Laboratory Service                                                                                                                                                                                                                                | Mohale T, Ntuli N, Mahlangu B, Allam M, Ismail A, Bhiman JN                                                                                                                                      |
| EPI_ISL_712092                                                                                                                                                                                                                                                                                                                                                                                                                                                                                                                                                                                                                                                                                                                                                                                                                                                                                                                                                                                                                                                                                                                                                                                                                                                                                                                                                                                                                                                                                                                                                                                                                                                                                                                                                                                                                                                                                                                                                                                                                                                                                 | East London NHLS Laboratory, Eastern Cape, South Africa                                                                                                               | National Institute for Communicable Diseases of the National Health Laboratory Service                                                                                                                                                                                                                                                                                   | Mohale T, Ntuli N, Mahlangu B, Allam M, Ismail A, Bhiman JN                                                                                                                                                                                                                                                           |                                                                                                                                                                                                  |
| EPI_ISL_712093, EPI_ISL_712094, EPI_ISL_712095, EPI_ISL_712096                                                                                                                                                                                                                                                                                                                                                                                                                                                                                                                                                                                                                                                                                                                                                                                                                                                                                                                                                                                                                                                                                                                                                                                                                                                                                                                                                                                                                                                                                                                                                                                                                                                                                                                                                                                                                                                                                                                                                                                                                                 | Port Elizabeth Provincial Hospital, National Health Laboratory Services, Eastern Cape, South Africa                                                                   | National Institute for Communicable Diseases of the National Health Laboratory Service                                                                                                                                                                                                                                                                                   | Mohale T, Ntuli N, Mahlangu B, Allam M, Ismail A, Bhiman JN                                                                                                                                                                                                                                                           |                                                                                                                                                                                                  |
| EPI_ISL_712568                                                                                                                                                                                                                                                                                                                                                                                                                                                                                                                                                                                                                                                                                                                                                                                                                                                                                                                                                                                                                                                                                                                                                                                                                                                                                                                                                                                                                                                                                                                                                                                                                                                                                                                                                                                                                                                                                                                                                                                                                                                                                 | Laboratoire de Microbiologie- CHU Habib Bourguiba - Sfax                                                                                                              | Laboratoire des Procédés de Criblage Moléculaire et Cellulaire-Centre de Biotechnologie de Sfax                                                                                                                                                                                                                                                                          | Souissi,A., Abid,N., Ben Ayed,I., Gargouri,S., Abdelmoulah,F.,Elargoubi,A., Smeti,I., Bensaid,M., Stambouli,N., Kharat,N., Ajili,F., Fki-berrajah,L., Mhalla,S., Chtourou,A., Gaaloul,I., Nabili,A., Turki,M., Aouni,M., Hammami,A., Mastouri,M., Karray Hakim,H., Kamoun,S., Rebai,A. and Masmoudi,S.                |                                                                                                                                                                                                  |
| EPI_ISL_723468                                                                                                                                                                                                                                                                                                                                                                                                                                                                                                                                                                                                                                                                                                                                                                                                                                                                                                                                                                                                                                                                                                                                                                                                                                                                                                                                                                                                                                                                                                                                                                                                                                                                                                                                                                                                                                                                                                                                                                                                                                                                                 | Port Elizabeth Provincial Hospital, National Health Laboratory Services, Eastern Cape, South Africa                                                                   | National Institute for Communicable Diseases of the National Health Laboratory Service                                                                                                                                                                                                                                                                                   | Mohale T, Ntuli N, Mahlangu B, Allam M, Ismail A, Bhiman JN                                                                                                                                                                                                                                                           |                                                                                                                                                                                                  |
| EPI_ISL_723469                                                                                                                                                                                                                                                                                                                                                                                                                                                                                                                                                                                                                                                                                                                                                                                                                                                                                                                                                                                                                                                                                                                                                                                                                                                                                                                                                                                                                                                                                                                                                                                                                                                                                                                                                                                                                                                                                                                                                                                                                                                                                 | Laboratoire Biolife                                                                                                                                                   | Laboratoire de Biotechnologie                                                                                                                                                                                                                                                                                                                                            | Mouna Ouadghiri, Tarik Aanniz, Mohammed Walid Chemaou Elfihri, Mohamed Chenaoui, Hanae Dakka, Afaf Alaoui, Otmame Touzani, Bouchra Belfquih, Lahcen Belyamani, Saaid Amzazi and Azeddine Ibrahim                                                                                                                      |                                                                                                                                                                                                  |
| EPI_ISL_728219                                                                                                                                                                                                                                                                                                                                                                                                                                                                                                                                                                                                                                                                                                                                                                                                                                                                                                                                                                                                                                                                                                                                                                                                                                                                                                                                                                                                                                                                                                                                                                                                                                                                                                                                                                                                                                                                                                                                                                                                                                                                                 | Laboratoire Biolife                                                                                                                                                   | Laboratoire de Biotechnologie                                                                                                                                                                                                                                                                                                                                            | Mouna Ouadghiri, Tarik Aanniz, Mohammed Walid Chemaou Elfihri, Mohamed Chenaoui, Hanae Dakka, Afaf Alaoui, Otmame Touzani, Bouchra Belfquih, Lahcen Belyamani, Saaid Amzazi and Azeddine Ibrahim                                                                                                                      |                                                                                                                                                                                                  |
| EPI_ISL_728221, EPI_ISL_728222, EPI_ISL_728223, EPI_ISL_728224, EPI_ISL_728235, EPI_ISL_728236, EPI_ISL_728237                                                                                                                                                                                                                                                                                                                                                                                                                                                                                                                                                                                                                                                                                                                                                                                                                                                                                                                                                                                                                                                                                                                                                                                                                                                                                                                                                                                                                                                                                                                                                                                                                                                                                                                                                                                                                                                                                                                                                                                 | LNR National Reference Laboratory, Mohammed VI University of Health Sciences                                                                                          | Medical Biotechnology Laboratory, Rabat Medical and Pharmacy School, Mohammed The Vth University in Rabat                                                                                                                                                                                                                                                                | Souad KARTTI, Housna ARROUCHI, Loubna ALLAM, Mounem Essabbar, Mouna OUADGHIRI, Tarek Aanniz, Nabila Soara, Adib Ghassan, Saaid AMZAZI, Lahcen BELYAMANI and Azeddine IBRAHIMI                                                                                                                                         |                                                                                                                                                                                                  |
| EPI_ISL_728272, EPI_ISL_728273, EPI_ISL_728274, EPI_ISL_728275, EPI_ISL_728276, EPI_ISL_728277, EPI_ISL_728289, EPI_ISL_728290, EPI_ISL_728291, EPI_ISL_728295, EPI_ISL_728297, EPI_ISL_728301, EPI_ISL_728322, EPI_ISL_728332, EPI_ISL_728334, EPI_ISL_728336, EPI_ISL_728339                                                                                                                                                                                                                                                                                                                                                                                                                                                                                                                                                                                                                                                                                                                                                                                                                                                                                                                                                                                                                                                                                                                                                                                                                                                                                                                                                                                                                                                                                                                                                                                                                                                                                                                                                                                                                 | see above                                                                                                                                                             | Laboratoire Biolife                                                                                                                                                                                                                                                                                                                                                      | Laboratoire de Biotechnologie                                                                                                                                                                                                                                                                                         | Mouna Ouadghiri, Tarik Aanniz, Mohammed Walid Chemaou Elfihri, Mohamed Chenaoui, Hanae Dakka, Afaf Alaoui, Otmame Touzani, Bouchra Belfquih, Lahcen belyamani, Saaid Amzazi and Azeddine Ibrahim |
| EPI_ISL_728340                                                                                                                                                                                                                                                                                                                                                                                                                                                                                                                                                                                                                                                                                                                                                                                                                                                                                                                                                                                                                                                                                                                                                                                                                                                                                                                                                                                                                                                                                                                                                                                                                                                                                                                                                                                                                                                                                                                                                                                                                                                                                 | Laboratoire Biolife                                                                                                                                                   | Laboratoire de Biotechnologie                                                                                                                                                                                                                                                                                                                                            | Mouna Ouadghiri, Tarik Aanniz, Mohammed Walid Chemaou Elfihri, Mohamed Chenaoui, Hanae Dakka, Afaf Alaoui, Otmame Touzani, Bouchra Belfquih, Lahcen belyamani, Saaid Amzazi and Azeddine Ibrahim                                                                                                                      |                                                                                                                                                                                                  |
| EPI_ISL_728342, EPI_ISL_728344, EPI_ISL_728347, EPI_ISL_728349, EPI_ISL_728352, EPI_ISL_728353, EPI_ISL_728355, EPI_ISL_728359, EPI_ISL_728360, EPI_ISL_728363, EPI_ISL_728366, EPI_ISL_728367                                                                                                                                                                                                                                                                                                                                                                                                                                                                                                                                                                                                                                                                                                                                                                                                                                                                                                                                                                                                                                                                                                                                                                                                                                                                                                                                                                                                                                                                                                                                                                                                                                                                                                                                                                                                                                                                                                 | see above                                                                                                                                                             | Laboratoire Biolife                                                                                                                                                                                                                                                                                                                                                      | Laboratoire de Biotechnologie                                                                                                                                                                                                                                                                                         | Mouna Ouadghiri, Tarik Aanniz, Mohammed Walid Chemaou Elfihri, Mohamed Chenaoui, Hanae Dakka, Afaf Alaoui, Otmame Touzani, Bouchra Belfquih, Lahcen belyamani, Saaid Amzazi and Azeddine Ibrahim |
| EPI_ISL_729920, EPI_ISL_729921, EPI_ISL_729922, EPI_ISL_729923, EPI_ISL_729924, EPI_ISL_729925, EPI_ISL_729926, EPI_ISL_729927, EPI_ISL_729928, EPI_ISL_729929, EPI_ISL_729930, EPI_ISL_729931, EPI_ISL_729932, EPI_ISL_729933, EPI_ISL_729934, EPI_ISL_729935, EPI_ISL_729936, EPI_ISL_729937, EPI_ISL_729938, EPI_ISL_729939, EPI_ISL_729940, EPI_ISL_729941, EPI_ISL_729942, EPI_ISL_729943, EPI_ISL_729944, EPI_ISL_729945, EPI_ISL_729946, EPI_ISL_729947, EPI_ISL_729948, EPI_ISL_729949, EPI_ISL_729950, EPI_ISL_729951, EPI_ISL_729952, EPI_ISL_729953, EPI_ISL_729954, EPI_ISL_729955, EPI_ISL_729956, EPI_ISL_729957, EPI_ISL_729958, EPI_ISL_729959, EPI_ISL_729960, EPI_ISL_729961, EPI_ISL_729962, EPI_ISL_729963, EPI_ISL_729964, EPI_ISL_729965, EPI_ISL_729966, EPI_ISL_729967, EPI_ISL_729968, EPI_ISL_729969, EPI_ISL_729970, EPI_ISL_729971, EPI_ISL_729972, EPI_ISL_729973, EPI_ISL_729974, EPI_ISL_729975, EPI_ISL_729976, EPI_ISL_729977, EPI_ISL_729978, EPI_ISL_729979, EPI_ISL_729980, EPI_ISL_729981, EPI_ISL_729982, EPI_ISL_729983, EPI_ISL_729984, EPI_ISL_729985, EPI_ISL_729986, EPI_ISL_729987, EPI_ISL_729988, EPI_ISL_729989, EPI_ISL_729990, EPI_ISL_729991, EPI_ISL_729992, EPI_ISL_729993, EPI_ISL_729994, EPI_ISL_729995, EPI_ISL_729996, EPI_ISL_729997, EPI_ISL_729998, EPI_ISL_729999, EPI_ISL_730000, EPI_ISL_730001, EPI_ISL_730002, EPI_ISL_730003, EPI_ISL_730004, EPI_ISL_730005, EPI_ISL_730006, EPI_ISL_730007, EPI_ISL_730008, EPI_ISL_730009, EPI_ISL_730010, EPI_ISL_730011, EPI_ISL_730012, EPI_ISL_730013, EPI_ISL_730014, EPI_ISL_730015, EPI_ISL_730016, EPI_ISL_730017, EPI_ISL_730018, EPI_ISL_730019, EPI_ISL_730020, EPI_ISL_730021, EPI_ISL_730022, EPI_ISL_730023, EPI_ISL_730024, EPI_ISL_730025, EPI_ISL_730026, EPI_ISL_730027, EPI_ISL_730028, EPI_ISL_730029, EPI_ISL_730030, EPI_ISL_730031, EPI_ISL_730032, EPI_ISL_730033, EPI_ISL_730034, EPI_ISL_730035, EPI_ISL_730036, EPI_ISL_730037, EPI_ISL_730038, EPI_ISL_730039, EPI_ISL_730040, EPI_ISL_730041, EPI_ISL_730042, EPI_ISL_730043, EPI_ISL_730044, EPI_ISL_730045 | see above                                                                                                                                                             | Nigeria Centre for Disease Control (NCDC)                                                                                                                                                                                                                                                                                                                                | African Centre of Excellence for Genomics of Infectious Diseases (ACEGID), Redeemer's University, Ede, Osun State, Nigeria                                                                                                                                                                                            | Oluniyi P.E. et al                                                                                                                                                                               |
| EPI_ISL_733499, EPI_ISL_733500                                                                                                                                                                                                                                                                                                                                                                                                                                                                                                                                                                                                                                                                                                                                                                                                                                                                                                                                                                                                                                                                                                                                                                                                                                                                                                                                                                                                                                                                                                                                                                                                                                                                                                                                                                                                                                                                                                                                                                                                                                                                 | 1-Laboratory of Microbiology, National Reference Lab, Charles Nicolle Hospital; 2-University of Tunis ElManar, Faculty of Medicine of Tunis, LR99ES09, Tunis, Tunisia | 1-Clinical and Experimental Pharmacology Lab, LR16SP02, National Center of Pharmacovigilance, University of Tunis El Manar, Tunis, Tunisia. 2-Neurodegenerative diseases and psychiatric troubles, LR18SP03, Razi Hospital, University of Tunis El Manar, Tunis, Tunisia. 3- Ministry of Health, National Observatory of New and Emerging Diseases, 1006, Tunis, Tunisia | Ilhem Boutiba-Ben Boubaker, Sameh Trabelsi, Nissaf Ben Aleya, Maher Kharat, Alia Ben Kahla, Jalila Ben Khelil, Salma Abid, Sana Ferjani, Mouna Ben Sassi, Mouna Safer, Guedi Ali Barreh, Habiba Ben Romdhane, Souissi Amira, Sarra Chamman, Hanen El Jebari, Asma Ferjani, Gaies Emna, Riadh Daghtous, Riadh Gouider. |                                                                                                                                                                                                  |
| EPI_ISL_735436                                                                                                                                                                                                                                                                                                                                                                                                                                                                                                                                                                                                                                                                                                                                                                                                                                                                                                                                                                                                                                                                                                                                                                                                                                                                                                                                                                                                                                                                                                                                                                                                                                                                                                                                                                                                                                                                                                                                                                                                                                                                                 | Nucleic Acid Testing - Rwanda National Reference Laboratory                                                                                                           | GIGA Medical Genomics                                                                                                                                                                                                                                                                                                                                                    | Yvan Butera, Keith Durkin, Maria Artesi, Bouchra Boujemla, Robert Rutayisire, Patrick Tuyisenge, Esperence Umumararungu, Sébastien Bontems, Marie-Pierre Hayette, Swaibu Gatara, Jacob Souopgui, Sabin Nsanzimana, Vincent Bours, Léon Mutesa                                                                         |                                                                                                                                                                                                  |
| EPI_ISL_735437                                                                                                                                                                                                                                                                                                                                                                                                                                                                                                                                                                                                                                                                                                                                                                                                                                                                                                                                                                                                                                                                                                                                                                                                                                                                                                                                                                                                                                                                                                                                                                                                                                                                                                                                                                                                                                                                                                                                                                                                                                                                                 | Nucleic Acid Testing - Rwanda National Reference Laboratory                                                                                                           | GIGA Medical Genomics                                                                                                                                                                                                                                                                                                                                                    | Yvan Butera, Keith Durkin, Maria Artesi, Bouchra Boujemla, Robert Rutayisire, Patrick Tuyisenge, Esperence Umumararungu, Sébastien Bontems, Marie-Pierre Hayette, Swaibu Gatara, Jacob Souopgui, Sabin Nsanzimana, Vincent Bours, Léon Mutesa                                                                         |                                                                                                                                                                                                  |
| EPI_ISL_735438                                                                                                                                                                                                                                                                                                                                                                                                                                                                                                                                                                                                                                                                                                                                                                                                                                                                                                                                                                                                                                                                                                                                                                                                                                                                                                                                                                                                                                                                                                                                                                                                                                                                                                                                                                                                                                                                                                                                                                                                                                                                                 | Nucleic Acid Testing - Rwanda National Reference Laboratory                                                                                                           | GIGA Medical Genomics                                                                                                                                                                                                                                                                                                                                                    | Yvan Butera, Keith Durkin, Maria Artesi, Bouchra Boujemla, Robert Rutayisire, Patrick Tuyisenge, Esperence Umumararungu, Sébastien Bontems, Marie-Pierre Hayette, Swaibu Gatara, Jacob Souopgui, Sabin Nsanzimana, Vincent Bours, Léon Mutesa                                                                         |                                                                                                                                                                                                  |
| EPI_ISL_735444                                                                                                                                                                                                                                                                                                                                                                                                                                                                                                                                                                                                                                                                                                                                                                                                                                                                                                                                                                                                                                                                                                                                                                                                                                                                                                                                                                                                                                                                                                                                                                                                                                                                                                                                                                                                                                                                                                                                                                                                                                                                                 | Nucleic Acid Testing - Rwanda National Reference Laboratory                                                                                                           | GIGA Medical Genomics                                                                                                                                                                                                                                                                                                                                                    | Yvan Butera, Keith Durkin, Maria Artesi, Bouchra Boujemla, Robert Rutayisire, Patrick Tuyisenge, Esperence Umumararungu, Sébastien Bontems, Marie-Pierre Hayette, Swaibu Gatara, Jacob Souopgui, Sabin Nsanzimana, Vincent Bours, Léon Mutesa                                                                         |                                                                                                                                                                                                  |
| EPI_ISL_735445                                                                                                                                                                                                                                                                                                                                                                                                                                                                                                                                                                                                                                                                                                                                                                                                                                                                                                                                                                                                                                                                                                                                                                                                                                                                                                                                                                                                                                                                                                                                                                                                                                                                                                                                                                                                                                                                                                                                                                                                                                                                                 | Rwanda National Reference Laboratory                                                                                                                                  | GIGA Medical Genomics                                                                                                                                                                                                                                                                                                                                                    | Yvan Butera, Keith Durkin, Maria Artesi, Bouchra Boujemla, Robert Rutayisire, Patrick Tuyisenge, Esperence Umumararungu, Sébastien Bontems, Marie-Pierre Hayette, Swaibu Gatara, Jacob Souopgui, Sabin Nsanzimana, Vincent Bours, Léon Mutesa                                                                         |                                                                                                                                                                                                  |
| EPI_ISL_735446, EPI_ISL_735447, EPI_ISL_735448                                                                                                                                                                                                                                                                                                                                                                                                                                                                                                                                                                                                                                                                                                                                                                                                                                                                                                                                                                                                                                                                                                                                                                                                                                                                                                                                                                                                                                                                                                                                                                                                                                                                                                                                                                                                                                                                                                                                                                                                                                                 | Nucleic Acid Testing - Rwanda National Reference Laboratory                                                                                                           | GIGA Medical Genomics                                                                                                                                                                                                                                                                                                                                                    | Yvan Butera, Keith Durkin, Maria Artesi, Bouchra Boujemla, Robert Rutayisire, Patrick Tuyisenge, Esperence Umumararungu, Sébastien Bontems, Marie-Pierre Hayette, Swaibu Gatara, Jacob Souopgui, Sabin Nsanzimana, Vincent Bours, Léon Mutesa                                                                         |                                                                                                                                                                                                  |
| EPI_ISL_736925, EPI_ISL_736926                                                                                                                                                                                                                                                                                                                                                                                                                                                                                                                                                                                                                                                                                                                                                                                                                                                                                                                                                                                                                                                                                                                                                                                                                                                                                                                                                                                                                                                                                                                                                                                                                                                                                                                                                                                                                                                                                                                                                                                                                                                                 | NHLS-IALCH                                                                                                                                                            | KRISP, KZN Research Innovation and Sequencing Platform                                                                                                                                                                                                                                                                                                                   | Giandhari J, Pillay S, Lessells R, ChimukangaraB, Mdlalose K, York D, Khan S, Tegally H, Wilkinson E, de Oliveira T                                                                                                                                                                                                   |                                                                                                                                                                                                  |
| EPI_ISL_736927                                                                                                                                                                                                                                                                                                                                                                                                                                                                                                                                                                                                                                                                                                                                                                                                                                                                                                                                                                                                                                                                                                                                                                                                                                                                                                                                                                                                                                                                                                                                                                                                                                                                                                                                                                                                                                                                                                                                                                                                                                                                                 | MDS                                                                                                                                                                   | KRISP, KZN Research Innovation and Sequencing Platform                                                                                                                                                                                                                                                                                                                   | Giandhari J, Pillay S, Lessells R, ChimukangaraB, Mdlalose K, York D, Khan S, Tegally H, Wilkinson E, de Oliveira T                                                                                                                                                                                                   |                                                                                                                                                                                                  |
| EPI_ISL_736928, EPI_ISL_736929                                                                                                                                                                                                                                                                                                                                                                                                                                                                                                                                                                                                                                                                                                                                                                                                                                                                                                                                                                                                                                                                                                                                                                                                                                                                                                                                                                                                                                                                                                                                                                                                                                                                                                                                                                                                                                                                                                                                                                                                                                                                 | NHLS-UCT                                                                                                                                                              | KRISP, KZN Research Innovation and Sequencing Platform                                                                                                                                                                                                                                                                                                                   | Arash Iranzadeh, Deelan Doolabh, Lynn Tyers, Bruna Galva, Innocent Mudau, Marvin Hsiao, Kruger Marais, Jennifer Giandhari, Sureshnee Pillay, Houriyah Tegally, Emanuel James San, Tulio de Oliveira, Diana Hardie, Stephen Korsman, Carolyn Williamson                                                                |                                                                                                                                                                                                  |
| EPI_ISL_736930                                                                                                                                                                                                                                                                                                                                                                                                                                                                                                                                                                                                                                                                                                                                                                                                                                                                                                                                                                                                                                                                                                                                                                                                                                                                                                                                                                                                                                                                                                                                                                                                                                                                                                                                                                                                                                                                                                                                                                                                                                                                                 | MDS                                                                                                                                                                   | KRISP, KZN Research Innovation and Sequencing Platform                                                                                                                                                                                                                                                                                                                   | Giandhari J, Pillay S, Lessells R, ChimukangaraB, Mdlalose K, York D, Khan S, Tegally H, Wilkinson E, de Oliveira T                                                                                                                                                                                                   |                                                                                                                                                                                                  |
| EPI_ISL_736931, EPI_ISL_736932, EPI_ISL_736933, EPI_ISL_736934                                                                                                                                                                                                                                                                                                                                                                                                                                                                                                                                                                                                                                                                                                                                                                                                                                                                                                                                                                                                                                                                                                                                                                                                                                                                                                                                                                                                                                                                                                                                                                                                                                                                                                                                                                                                                                                                                                                                                                                                                                 | NHLS-IALCH                                                                                                                                                            | KRISP, KZN Research Innovation and Sequencing Platform                                                                                                                                                                                                                                                                                                                   | Giandhari J, Pillay S, Lessells R, ChimukangaraB, Mdlalose K, York D, Khan S, Tegally H, Wilkinson E, de Oliveira T                                                                                                                                                                                                   |                                                                                                                                                                                                  |

|                                                                                                                                                                                                                                                                                                                                                                                                                                                                                                                                                                                                                                                                                                                                                                                                                                                                                                                                                                                                                                                                                                                                                                                                                                                                                                                                                                                                                                                                                                                                                                                                                                                                                                                                                                                                                                                                |                                                                      |                                                                                           |                                                                                                                                                                                                                                                                                 |  |
|----------------------------------------------------------------------------------------------------------------------------------------------------------------------------------------------------------------------------------------------------------------------------------------------------------------------------------------------------------------------------------------------------------------------------------------------------------------------------------------------------------------------------------------------------------------------------------------------------------------------------------------------------------------------------------------------------------------------------------------------------------------------------------------------------------------------------------------------------------------------------------------------------------------------------------------------------------------------------------------------------------------------------------------------------------------------------------------------------------------------------------------------------------------------------------------------------------------------------------------------------------------------------------------------------------------------------------------------------------------------------------------------------------------------------------------------------------------------------------------------------------------------------------------------------------------------------------------------------------------------------------------------------------------------------------------------------------------------------------------------------------------------------------------------------------------------------------------------------------------|----------------------------------------------------------------------|-------------------------------------------------------------------------------------------|---------------------------------------------------------------------------------------------------------------------------------------------------------------------------------------------------------------------------------------------------------------------------------|--|
| EPI_ISL_736935                                                                                                                                                                                                                                                                                                                                                                                                                                                                                                                                                                                                                                                                                                                                                                                                                                                                                                                                                                                                                                                                                                                                                                                                                                                                                                                                                                                                                                                                                                                                                                                                                                                                                                                                                                                                                                                 |                                                                      |                                                                                           |                                                                                                                                                                                                                                                                                 |  |
| EPI_ISL_736936, EPI_ISL_736937                                                                                                                                                                                                                                                                                                                                                                                                                                                                                                                                                                                                                                                                                                                                                                                                                                                                                                                                                                                                                                                                                                                                                                                                                                                                                                                                                                                                                                                                                                                                                                                                                                                                                                                                                                                                                                 | Netcare                                                              | KRISP, KZN Research Innovation and Sequencing Platform                                    | Giandhari J, Pillay S, Lessells R, ChimukangaraB, Mdlalose K, York D, Khan S, Tegally H, Wilkinson E, de Oliveira T                                                                                                                                                             |  |
| EPI_ISL_736938                                                                                                                                                                                                                                                                                                                                                                                                                                                                                                                                                                                                                                                                                                                                                                                                                                                                                                                                                                                                                                                                                                                                                                                                                                                                                                                                                                                                                                                                                                                                                                                                                                                                                                                                                                                                                                                 | NHLS-IALCH                                                           | KRISP, KZN Research Innovation and Sequencing Platform                                    | Giandhari J, Pillay S, Lessells R, ChimukangaraB, Mdlalose K, York D, Khan S, Tegally H, Wilkinson E, de Oliveira T                                                                                                                                                             |  |
| EPI_ISL_736939                                                                                                                                                                                                                                                                                                                                                                                                                                                                                                                                                                                                                                                                                                                                                                                                                                                                                                                                                                                                                                                                                                                                                                                                                                                                                                                                                                                                                                                                                                                                                                                                                                                                                                                                                                                                                                                 | NHLS-UCT                                                             | KRISP, KZN Research Innovation and Sequencing Platform                                    | Arash Iranzadeh, Deelan Doolabh, Lynn Tyers, Bruna Galvao, Innocent Mudau, Marvin Hsiao, Kruger Marais, Jennifer Giandhari, Sureshnee Pillay, Houriyah Tegally, Emanuel James San, Tulio de Oliveira, Diana Hardie, Stephen Korsman, Carolyn Williamson                         |  |
| EPI_ISL_736940, EPI_ISL_736941, EPI_ISL_736942, EPI_ISL_736943, EPI_ISL_736944, EPI_ISL_736945, EPI_ISL_736946, EPI_ISL_736947, EPI_ISL_736948, EPI_ISL_736949, EPI_ISL_736950, EPI_ISL_736951, EPI_ISL_736952, EPI_ISL_736953, EPI_ISL_736954, EPI_ISL_736955, EPI_ISL_736956, EPI_ISL_736957, EPI_ISL_736958, EPI_ISL_736959, EPI_ISL_736960                                                                                                                                                                                                                                                                                                                                                                                                                                                                                                                                                                                                                                                                                                                                                                                                                                                                                                                                                                                                                                                                                                                                                                                                                                                                                                                                                                                                                                                                                                                 |                                                                      |                                                                                           |                                                                                                                                                                                                                                                                                 |  |
| see above                                                                                                                                                                                                                                                                                                                                                                                                                                                                                                                                                                                                                                                                                                                                                                                                                                                                                                                                                                                                                                                                                                                                                                                                                                                                                                                                                                                                                                                                                                                                                                                                                                                                                                                                                                                                                                                      | NHLS-IALCH                                                           | KRISP, KZN Research Innovation and Sequencing Platform                                    | Giandhari J, Pillay S, Lessells R, ChimukangaraB, Mdlalose K, York D, Khan S, Tegally H, Wilkinson E, de Oliveira T                                                                                                                                                             |  |
| EPI_ISL_736961, EPI_ISL_736962, EPI_ISL_736963, EPI_ISL_736964, EPI_ISL_736965                                                                                                                                                                                                                                                                                                                                                                                                                                                                                                                                                                                                                                                                                                                                                                                                                                                                                                                                                                                                                                                                                                                                                                                                                                                                                                                                                                                                                                                                                                                                                                                                                                                                                                                                                                                 | Netcare                                                              | KRISP, KZN Research Innovation and Sequencing Platform                                    | Giandhari J, Pillay S, Lessells R, ChimukangaraB, Mdlalose K, York D, Khan S, Tegally H, Wilkinson E, de Oliveira T                                                                                                                                                             |  |
| EPI_ISL_736966, EPI_ISL_736967, EPI_ISL_736968                                                                                                                                                                                                                                                                                                                                                                                                                                                                                                                                                                                                                                                                                                                                                                                                                                                                                                                                                                                                                                                                                                                                                                                                                                                                                                                                                                                                                                                                                                                                                                                                                                                                                                                                                                                                                 | MDS                                                                  | KRISP, KZN Research Innovation and Sequencing Platform                                    | Giandhari J, Pillay S, Lessells R, ChimukangaraB, Mdlalose K, York D, Khan S, Tegally H, Wilkinson E, de Oliveira T                                                                                                                                                             |  |
| EPI_ISL_736969, EPI_ISL_736970, EPI_ISL_736971, EPI_ISL_736972, EPI_ISL_736973, EPI_ISL_736974, EPI_ISL_736975, EPI_ISL_736976, EPI_ISL_736977, EPI_ISL_736978, EPI_ISL_736979, EPI_ISL_736980                                                                                                                                                                                                                                                                                                                                                                                                                                                                                                                                                                                                                                                                                                                                                                                                                                                                                                                                                                                                                                                                                                                                                                                                                                                                                                                                                                                                                                                                                                                                                                                                                                                                 |                                                                      |                                                                                           |                                                                                                                                                                                                                                                                                 |  |
| see above                                                                                                                                                                                                                                                                                                                                                                                                                                                                                                                                                                                                                                                                                                                                                                                                                                                                                                                                                                                                                                                                                                                                                                                                                                                                                                                                                                                                                                                                                                                                                                                                                                                                                                                                                                                                                                                      | NHLS-IALCH                                                           | KRISP, KZN Research Innovation and Sequencing Platform                                    | Giandhari J, Pillay S, Lessells R, ChimukangaraB, Mdlalose K, York D, Khan S, Tegally H, Wilkinson E, de Oliveira T                                                                                                                                                             |  |
| EPI_ISL_736981, EPI_ISL_736982, EPI_ISL_736983                                                                                                                                                                                                                                                                                                                                                                                                                                                                                                                                                                                                                                                                                                                                                                                                                                                                                                                                                                                                                                                                                                                                                                                                                                                                                                                                                                                                                                                                                                                                                                                                                                                                                                                                                                                                                 | NHLS-UCT                                                             | KRISP, KZN Research Innovation and Sequencing Platform                                    | Arash Iranzadeh, Deelan Doolabh, Lynn Tyers, Bruna Galvao, Innocent Mudau, Marvin Hsiao, Kruger Marais, Jennifer Giandhari, Sureshnee Pillay, Houriyah Tegally, Emanuel James San, Tulio de Oliveira, Diana Hardie, Stephen Korsman, Carolyn Williamson                         |  |
| EPI_ISL_736984, EPI_ISL_736985, EPI_ISL_736986, EPI_ISL_736987, EPI_ISL_736988, EPI_ISL_736989, EPI_ISL_736990, EPI_ISL_736991, EPI_ISL_736992, EPI_ISL_736993, EPI_ISL_736994                                                                                                                                                                                                                                                                                                                                                                                                                                                                                                                                                                                                                                                                                                                                                                                                                                                                                                                                                                                                                                                                                                                                                                                                                                                                                                                                                                                                                                                                                                                                                                                                                                                                                 |                                                                      |                                                                                           |                                                                                                                                                                                                                                                                                 |  |
| see above                                                                                                                                                                                                                                                                                                                                                                                                                                                                                                                                                                                                                                                                                                                                                                                                                                                                                                                                                                                                                                                                                                                                                                                                                                                                                                                                                                                                                                                                                                                                                                                                                                                                                                                                                                                                                                                      | NHLS-IALCH                                                           | KRISP, KZN Research Innovation and Sequencing Platform                                    | Giandhari J, Pillay S, Lessells R, ChimukangaraB, Mdlalose K, York D, Khan S, Tegally H, Wilkinson E, de Oliveira T                                                                                                                                                             |  |
| EPI_ISL_736995                                                                                                                                                                                                                                                                                                                                                                                                                                                                                                                                                                                                                                                                                                                                                                                                                                                                                                                                                                                                                                                                                                                                                                                                                                                                                                                                                                                                                                                                                                                                                                                                                                                                                                                                                                                                                                                 | MDS                                                                  | KRISP, KZN Research Innovation and Sequencing Platform                                    | Giandhari J, Pillay S, Lessells R, ChimukangaraB, Mdlalose K, York D, Khan S, Tegally H, Wilkinson E, de Oliveira T                                                                                                                                                             |  |
| EPI_ISL_737200                                                                                                                                                                                                                                                                                                                                                                                                                                                                                                                                                                                                                                                                                                                                                                                                                                                                                                                                                                                                                                                                                                                                                                                                                                                                                                                                                                                                                                                                                                                                                                                                                                                                                                                                                                                                                                                 | National Reference Laboratory, Nigeria Centre for Disease Control.   | National Reference Laboratory, Nigeria Centre for Disease Control, Gaduwa, Abuja, Nigeria | Dr Ndodo Nnaemeka, Olusola Akanbi, Chimaobi Chukwu, Dr Adesuyi Omoare, Nwando Mba, Shirlee Wohl, Dr Chikwe Ihekweazu                                                                                                                                                            |  |
| EPI_ISL_737201                                                                                                                                                                                                                                                                                                                                                                                                                                                                                                                                                                                                                                                                                                                                                                                                                                                                                                                                                                                                                                                                                                                                                                                                                                                                                                                                                                                                                                                                                                                                                                                                                                                                                                                                                                                                                                                 | National Reference Laboratory, Nigeria Centre for Disease Control.   | National Reference Laboratory, Nigeria Centre for Disease Control, Gaduwa, Abuja, Nigeria | Dr Ndodo Nnaemeka, Olusola Akanbi, Chimaobi Chukwu, Dr Adesuyi Omoare, oluwaseyi Ajegbe, Grace Esebanmen, Nwando Mba, Shirlee Wohl, Anthony Ahumibe, Celestina Obiekea, Catherine Okoi, Akinpelu Afolabi, Kingsley Njoku, Dr Sikiru Badaru, Dr Chinwe Ochu, Dr Chikwe Ihekweazu |  |
| EPI_ISL_737205                                                                                                                                                                                                                                                                                                                                                                                                                                                                                                                                                                                                                                                                                                                                                                                                                                                                                                                                                                                                                                                                                                                                                                                                                                                                                                                                                                                                                                                                                                                                                                                                                                                                                                                                                                                                                                                 | National Reference Laboratory, Nigeria Centre for Disease Control.   | National Reference Laboratory, Nigeria Centre for Disease Control, Gaduwa, Abuja, Nigeria | Dr Ndodo Nnaemeka, Olusola Akanbi, Chimaobi Chukwu, Dr Adesuyi Omoare, Nwando Mba, Shirlee Wohl, (JHU), Anthony Ahumibe, Celestina Obiekea, Catherine Okoi, Peter Van Heusden (SANBI), Dr Chikwe Ihekweazu                                                                      |  |
| EPI_ISL_737206                                                                                                                                                                                                                                                                                                                                                                                                                                                                                                                                                                                                                                                                                                                                                                                                                                                                                                                                                                                                                                                                                                                                                                                                                                                                                                                                                                                                                                                                                                                                                                                                                                                                                                                                                                                                                                                 | National Reference Laboratory, Nigeria Centre for Disease Control.   | National Reference Laboratory, Nigeria Centre for Disease Control, Gaduwa, Abuja, Nigeria | Dr Ndodo Nnaemeka, Olusola Akanbi, Chimaobi Chukwu, Dr Adesuyi Omoare, Grace Esebanmen, Nwando Mba, Shirlee Wohl, Anthony Ahumibe, Celestina Obiekea, Catherine Okoi, Dr Chinwe Ochu, Dr Chikwe Ihekweazu.                                                                      |  |
| EPI_ISL_737207                                                                                                                                                                                                                                                                                                                                                                                                                                                                                                                                                                                                                                                                                                                                                                                                                                                                                                                                                                                                                                                                                                                                                                                                                                                                                                                                                                                                                                                                                                                                                                                                                                                                                                                                                                                                                                                 | National Reference Laboratory, Nigeria Centre for Disease Control.   | National Reference Laboratory, Nigeria Centre for Disease Control, Gaduwa, Abuja, Nigeria | Dr Ndodo Nnaemeka, Olusola Akanbi, Chimaobi Chukwu, Dr Adesuyi Omoare, Shirlee Wohl, Anthony Ahumibe, Abdulmajid Musa, Nneamaka Uba, Bamidele Olorunfemi, Kingsley Madubuikwe, Dr Sikiru Badaru, Adama Ahmad, Michael Popoola, Dr Chikwe Ihekweazu                              |  |
| EPI_ISL_737931, EPI_ISL_737932, EPI_ISL_737933, EPI_ISL_737934, EPI_ISL_737935, EPI_ISL_737936, EPI_ISL_737937, EPI_ISL_737938, EPI_ISL_737939, EPI_ISL_737940, EPI_ISL_737941, EPI_ISL_737942, EPI_ISL_737943, EPI_ISL_737944, EPI_ISL_737945, EPI_ISL_737946, EPI_ISL_737947, EPI_ISL_737948, EPI_ISL_737949, EPI_ISL_737950, EPI_ISL_737951, EPI_ISL_737952, EPI_ISL_737953, EPI_ISL_737954, EPI_ISL_737955, EPI_ISL_737956, EPI_ISL_737957, EPI_ISL_737958, EPI_ISL_737959, EPI_ISL_737960, EPI_ISL_737961, EPI_ISL_737962, EPI_ISL_737963, EPI_ISL_737964, EPI_ISL_737965, EPI_ISL_737966, EPI_ISL_737967, EPI_ISL_737968, EPI_ISL_737969, EPI_ISL_737970, EPI_ISL_737971, EPI_ISL_737972, EPI_ISL_737973, EPI_ISL_737974, EPI_ISL_737975, EPI_ISL_737976, EPI_ISL_737977, EPI_ISL_737978, EPI_ISL_737979, EPI_ISL_737980, EPI_ISL_737981, EPI_ISL_737982, EPI_ISL_737983, EPI_ISL_737984, EPI_ISL_737985, EPI_ISL_737986, EPI_ISL_737987, EPI_ISL_737988, EPI_ISL_737989, EPI_ISL_737990, EPI_ISL_737991, EPI_ISL_737992, EPI_ISL_737993, EPI_ISL_737994, EPI_ISL_737995, EPI_ISL_737996, EPI_ISL_737997, EPI_ISL_737998, EPI_ISL_737999, EPI_ISL_738000, EPI_ISL_738001, EPI_ISL_738002, EPI_ISL_738003, EPI_ISL_738004, EPI_ISL_738005, EPI_ISL_738006, EPI_ISL_738007, EPI_ISL_738008, EPI_ISL_738009, EPI_ISL_738010, EPI_ISL_738011, EPI_ISL_738012, EPI_ISL_738013, EPI_ISL_738014, EPI_ISL_738015, EPI_ISL_738016, EPI_ISL_738017, EPI_ISL_738018, EPI_ISL_738019, EPI_ISL_738020, EPI_ISL_738021, EPI_ISL_738022, EPI_ISL_738023, EPI_ISL_738025, EPI_ISL_738026, EPI_ISL_738027, EPI_ISL_738028, EPI_ISL_738029, EPI_ISL_738030, EPI_ISL_738031, EPI_ISL_738032, EPI_ISL_738033, EPI_ISL_738034, EPI_ISL_738035, EPI_ISL_738036, EPI_ISL_738037, EPI_ISL_738038, EPI_ISL_738039, EPI_ISL_738040, EPI_ISL_738041, EPI_ISL_738042, EPI_ISL_738043 |                                                                      |                                                                                           |                                                                                                                                                                                                                                                                                 |  |
| see above                                                                                                                                                                                                                                                                                                                                                                                                                                                                                                                                                                                                                                                                                                                                                                                                                                                                                                                                                                                                                                                                                                                                                                                                                                                                                                                                                                                                                                                                                                                                                                                                                                                                                                                                                                                                                                                      | Uganda Central Public Health Lab and Uganda Virus Research Institute | MRC/UVRI & LSHTM Uganda Research Unit                                                     | Matthew Cotten, Dan Lule Bugembe, My V.T. Phan, Pontiano Kaleebu et al.                                                                                                                                                                                                         |  |
| EPI_ISL_745109                                                                                                                                                                                                                                                                                                                                                                                                                                                                                                                                                                                                                                                                                                                                                                                                                                                                                                                                                                                                                                                                                                                                                                                                                                                                                                                                                                                                                                                                                                                                                                                                                                                                                                                                                                                                                                                 | Kraaifontein CHC wc KFP                                              | National Health Laboratory Service (NHLS), Tygerberg                                      | Susan Engelbrecht, Kayla Delaney, Bronwyn Kleinhans, Houriyah Tegally, Eduan Wilkinton, Gert van Zyl, Wolfgang Preiser, Tulio de Oliveira                                                                                                                                       |  |
| EPI_ISL_745110                                                                                                                                                                                                                                                                                                                                                                                                                                                                                                                                                                                                                                                                                                                                                                                                                                                                                                                                                                                                                                                                                                                                                                                                                                                                                                                                                                                                                                                                                                                                                                                                                                                                                                                                                                                                                                                 | Elsies River CHC wc ERP                                              | National Health Laboratory Service (NHLS), Tygerberg                                      | Susan Engelbrecht, Kayla Delaney, Bronwyn Kleinhans, Houriyah Tegally, Eduan Wilkinton, Gert van Zyl, Wolfgang Preiser, Tulio de Oliveira                                                                                                                                       |  |
| EPI_ISL_745111                                                                                                                                                                                                                                                                                                                                                                                                                                                                                                                                                                                                                                                                                                                                                                                                                                                                                                                                                                                                                                                                                                                                                                                                                                                                                                                                                                                                                                                                                                                                                                                                                                                                                                                                                                                                                                                 | Khayelitsha (Site B) CHC wc KHC                                      | National Health Laboratory Service (NHLS), Tygerberg                                      | Susan Engelbrecht, Kayla Delaney, Bronwyn Kleinhans, Houriyah Tegally, Eduan Wilkinton, Gert van Zyl, Wolfgang Preiser, Tulio de Oliveira                                                                                                                                       |  |
| EPI_ISL_745112                                                                                                                                                                                                                                                                                                                                                                                                                                                                                                                                                                                                                                                                                                                                                                                                                                                                                                                                                                                                                                                                                                                                                                                                                                                                                                                                                                                                                                                                                                                                                                                                                                                                                                                                                                                                                                                 | Dr Van Niekerk Hospital                                              | National Health Laboratory Service (NHLS), Tygerberg                                      | Susan Engelbrecht, Kayla Delaney, Bronwyn Kleinhans, Houriyah Tegally, Eduan Wilkinton, Gert van Zyl, Wolfgang Preiser, Tulio de Oliveira                                                                                                                                       |  |
| EPI_ISL_745113                                                                                                                                                                                                                                                                                                                                                                                                                                                                                                                                                                                                                                                                                                                                                                                                                                                                                                                                                                                                                                                                                                                                                                                                                                                                                                                                                                                                                                                                                                                                                                                                                                                                                                                                                                                                                                                 | Dr Ivan Toms Clinic wc IVT                                           | National Health Laboratory Service (NHLS), Tygerberg                                      | Susan Engelbrecht, Kayla Delaney, Bronwyn Kleinhans, Houriyah Tegally, Eduan Wilkinton, Gert van Zyl, Wolfgang Preiser, Tulio de Oliveira                                                                                                                                       |  |
| EPI_ISL_745114, EPI_ISL_745115, EPI_ISL_745116                                                                                                                                                                                                                                                                                                                                                                                                                                                                                                                                                                                                                                                                                                                                                                                                                                                                                                                                                                                                                                                                                                                                                                                                                                                                                                                                                                                                                                                                                                                                                                                                                                                                                                                                                                                                                 | Khayelitsha Hospital wc KHA                                          | National Health Laboratory Service (NHLS), Tygerberg                                      | Susan Engelbrecht, Kayla Delaney, Bronwyn Kleinhans, Houriyah Tegally, Eduan Wilkinton, Gert van Zyl, Wolfgang Preiser, Tulio de Oliveira                                                                                                                                       |  |
| EPI_ISL_745117                                                                                                                                                                                                                                                                                                                                                                                                                                                                                                                                                                                                                                                                                                                                                                                                                                                                                                                                                                                                                                                                                                                                                                                                                                                                                                                                                                                                                                                                                                                                                                                                                                                                                                                                                                                                                                                 | Vredenburg Hospital wc VBG                                           | National Health Laboratory Service (NHLS), Tygerberg                                      | Susan Engelbrecht, Kayla Delaney, Bronwyn Kleinhans, Houriyah Tegally, Eduan Wilkinton, Gert van Zyl, Wolfgang Preiser, Tulio de Oliveira                                                                                                                                       |  |
| EPI_ISL_745118                                                                                                                                                                                                                                                                                                                                                                                                                                                                                                                                                                                                                                                                                                                                                                                                                                                                                                                                                                                                                                                                                                                                                                                                                                                                                                                                                                                                                                                                                                                                                                                                                                                                                                                                                                                                                                                 | Bishop Lavis CDC wc BLP                                              | National Health Laboratory Service (NHLS), Tygerberg                                      | Susan Engelbrecht, Kayla Delaney, Bronwyn Kleinhans, Houriyah Tegally, Eduan Wilkinton, Gert van Zyl, Wolfgang Preiser, Tulio de Oliveira                                                                                                                                       |  |
| EPI_ISL_745119                                                                                                                                                                                                                                                                                                                                                                                                                                                                                                                                                                                                                                                                                                                                                                                                                                                                                                                                                                                                                                                                                                                                                                                                                                                                                                                                                                                                                                                                                                                                                                                                                                                                                                                                                                                                                                                 | Eerste River Hospital wc ERH                                         | National Health Laboratory Service (NHLS), Tygerberg                                      | Susan Engelbrecht, Kayla Delaney, Bronwyn Kleinhans, Houriyah Tegally, Eduan Wilkinton, Gert van Zyl, Wolfgang Preiser, Tulio de Oliveira                                                                                                                                       |  |
| EPI_ISL_745120                                                                                                                                                                                                                                                                                                                                                                                                                                                                                                                                                                                                                                                                                                                                                                                                                                                                                                                                                                                                                                                                                                                                                                                                                                                                                                                                                                                                                                                                                                                                                                                                                                                                                                                                                                                                                                                 | Khayelitsha Hospital wc KHA                                          | National Health Laboratory Service (NHLS), Tygerberg                                      | Susan Engelbrecht, Kayla Delaney, Bronwyn Kleinhans, Houriyah Tegally, Eduan Wilkinton, Gert van Zyl, Wolfgang Preiser, Tulio de Oliveira                                                                                                                                       |  |
| EPI_ISL_745121                                                                                                                                                                                                                                                                                                                                                                                                                                                                                                                                                                                                                                                                                                                                                                                                                                                                                                                                                                                                                                                                                                                                                                                                                                                                                                                                                                                                                                                                                                                                                                                                                                                                                                                                                                                                                                                 | Calvinia Hospital                                                    | National Health Laboratory Service (NHLS), Tygerberg                                      | Susan Engelbrecht, Kayla Delaney, Bronwyn Kleinhans, Houriyah Tegally, Eduan Wilkinton, Gert van Zyl, Wolfgang Preiser, Tulio de Oliveira                                                                                                                                       |  |
| EPI_ISL_745122, EPI_ISL_745123                                                                                                                                                                                                                                                                                                                                                                                                                                                                                                                                                                                                                                                                                                                                                                                                                                                                                                                                                                                                                                                                                                                                                                                                                                                                                                                                                                                                                                                                                                                                                                                                                                                                                                                                                                                                                                 | Khayelitsha Hospital wc KHA                                          | National Health Laboratory Service (NHLS), Tygerberg                                      | Susan Engelbrecht, Kayla Delaney, Bronwyn Kleinhans, Houriyah Tegally, Eduan Wilkinton, Gert van Zyl, Wolfgang Preiser, Tulio de Oliveira                                                                                                                                       |  |
| EPI_ISL_745124                                                                                                                                                                                                                                                                                                                                                                                                                                                                                                                                                                                                                                                                                                                                                                                                                                                                                                                                                                                                                                                                                                                                                                                                                                                                                                                                                                                                                                                                                                                                                                                                                                                                                                                                                                                                                                                 | Laelitia Bam CHC                                                     | National Health Laboratory Service (NHLS), Tygerberg                                      | Susan Engelbrecht, Kayla Delaney, Bronwyn Kleinhans, Houriyah Tegally, Eduan Wilkinton, Gert van Zyl, Wolfgang Preiser, Tulio de Oliveira                                                                                                                                       |  |
| EPI_ISL_745125                                                                                                                                                                                                                                                                                                                                                                                                                                                                                                                                                                                                                                                                                                                                                                                                                                                                                                                                                                                                                                                                                                                                                                                                                                                                                                                                                                                                                                                                                                                                                                                                                                                                                                                                                                                                                                                 | Elsies River CHC wc ERP                                              | National Health Laboratory Service (NHLS), Tygerberg                                      | Susan Engelbrecht, Kayla Delaney, Bronwyn Kleinhans, Houriyah Tegally, Eduan Wilkinton, Gert van Zyl, Wolfgang Preiser, Tulio de Oliveira                                                                                                                                       |  |
| EPI_ISL_745126                                                                                                                                                                                                                                                                                                                                                                                                                                                                                                                                                                                                                                                                                                                                                                                                                                                                                                                                                                                                                                                                                                                                                                                                                                                                                                                                                                                                                                                                                                                                                                                                                                                                                                                                                                                                                                                 | Okiep CHC                                                            | National Health Laboratory Service (NHLS), Tygerberg                                      | Susan Engelbrecht, Kayla Delaney, Bronwyn Kleinhans, Houriyah Tegally, Eduan Wilkinton, Gert van Zyl, Wolfgang Preiser, Tulio de Oliveira                                                                                                                                       |  |
| EPI_ISL_745127                                                                                                                                                                                                                                                                                                                                                                                                                                                                                                                                                                                                                                                                                                                                                                                                                                                                                                                                                                                                                                                                                                                                                                                                                                                                                                                                                                                                                                                                                                                                                                                                                                                                                                                                                                                                                                                 | Khayelitsha (Site B) CHC wc KHC                                      | National Health Laboratory Service (NHLS), Tygerberg                                      | Susan Engelbrecht, Kayla Delaney, Bronwyn Kleinhans, Houriyah Tegally, Eduan Wilkinton, Gert van Zyl, Wolfgang Preiser, Tulio de Oliveira                                                                                                                                       |  |
| EPI_ISL_745128                                                                                                                                                                                                                                                                                                                                                                                                                                                                                                                                                                                                                                                                                                                                                                                                                                                                                                                                                                                                                                                                                                                                                                                                                                                                                                                                                                                                                                                                                                                                                                                                                                                                                                                                                                                                                                                 | CoVid EC Nelson Mandela Bay Metro                                    | National Health Laboratory Service (NHLS), Tygerberg                                      | Susan Engelbrecht, Kayla Delaney, Bronwyn Kleinhans, Houriyah Tegally, Eduan Wilkinton, Gert van Zyl, Wolfgang Preiser, Tulio de Oliveira                                                                                                                                       |  |
| EPI_ISL_745129                                                                                                                                                                                                                                                                                                                                                                                                                                                                                                                                                                                                                                                                                                                                                                                                                                                                                                                                                                                                                                                                                                                                                                                                                                                                                                                                                                                                                                                                                                                                                                                                                                                                                                                                                                                                                                                 | Port Nolloth Hospital                                                | National Health Laboratory Service (NHLS), Tygerberg                                      | Susan Engelbrecht, Kayla Delaney, Bronwyn Kleinhans, Houriyah Tegally, Eduan Wilkinton, Gert van Zyl, Wolfgang Preiser, Tulio de Oliveira                                                                                                                                       |  |
| EPI_ISL_745130                                                                                                                                                                                                                                                                                                                                                                                                                                                                                                                                                                                                                                                                                                                                                                                                                                                                                                                                                                                                                                                                                                                                                                                                                                                                                                                                                                                                                                                                                                                                                                                                                                                                                                                                                                                                                                                 | Langebaan Clinic wc LBC                                              | National Health Laboratory Service (NHLS), Tygerberg                                      | Susan Engelbrecht, Kayla Delaney, Bronwyn Kleinhans, Houriyah Tegally, Eduan Wilkinton, Gert van Zyl, Wolfgang Preiser, Tulio de Oliveira                                                                                                                                       |  |
| EPI_ISL_745131                                                                                                                                                                                                                                                                                                                                                                                                                                                                                                                                                                                                                                                                                                                                                                                                                                                                                                                                                                                                                                                                                                                                                                                                                                                                                                                                                                                                                                                                                                                                                                                                                                                                                                                                                                                                                                                 | Kraaifontein CHC wc KFP                                              | National Health Laboratory Service (NHLS), Tygerberg                                      | Susan Engelbrecht, Kayla Delaney, Bronwyn Kleinhans, Houriyah Tegally, Eduan Wilkinton, Gert van Zyl, Wolfgang Preiser, Tulio de Oliveira                                                                                                                                       |  |
| EPI_ISL_745132                                                                                                                                                                                                                                                                                                                                                                                                                                                                                                                                                                                                                                                                                                                                                                                                                                                                                                                                                                                                                                                                                                                                                                                                                                                                                                                                                                                                                                                                                                                                                                                                                                                                                                                                                                                                                                                 | Dr Ivan Toms Clinic wc IVT                                           | National Health Laboratory Service (NHLS), Tygerberg                                      | Susan Engelbrecht, Kayla Delaney, Bronwyn Kleinhans, Houriyah Tegally, Eduan Wilkinton, Gert van Zyl, Wolfgang Preiser, Tulio de Oliveira                                                                                                                                       |  |
| EPI_ISL_745133                                                                                                                                                                                                                                                                                                                                                                                                                                                                                                                                                                                                                                                                                                                                                                                                                                                                                                                                                                                                                                                                                                                                                                                                                                                                                                                                                                                                                                                                                                                                                                                                                                                                                                                                                                                                                                                 | Kraaifontein CHC wc KFP                                              | National Health Laboratory Service (NHLS), Tygerberg                                      | Susan Engelbrecht, Kayla Delaney, Bronwyn Kleinhans, Houriyah Tegally, Eduan Wilkinton, Gert van Zyl, Wolfgang Preiser, Tulio de Oliveira                                                                                                                                       |  |
| EPI_ISL_745134                                                                                                                                                                                                                                                                                                                                                                                                                                                                                                                                                                                                                                                                                                                                                                                                                                                                                                                                                                                                                                                                                                                                                                                                                                                                                                                                                                                                                                                                                                                                                                                                                                                                                                                                                                                                                                                 | Bishop Lavis CDC wc BLP                                              | National Health Laboratory Service (NHLS), Tygerberg                                      | Susan Engelbrecht, Kayla Delaney, Bronwyn Kleinhans, Houriyah Tegally, Eduan Wilkinton, Gert van Zyl, Wolfgang Preiser, Tulio de Oliveira                                                                                                                                       |  |
| EPI_ISL_745135                                                                                                                                                                                                                                                                                                                                                                                                                                                                                                                                                                                                                                                                                                                                                                                                                                                                                                                                                                                                                                                                                                                                                                                                                                                                                                                                                                                                                                                                                                                                                                                                                                                                                                                                                                                                                                                 | Joe Slovo Hospital                                                   | National Health Laboratory Service (NHLS), Tygerberg                                      | Susan Engelbrecht, Kayla Delaney, Bronwyn Kleinhans, Houriyah Tegally, Eduan Wilkinton, Gert van Zyl, Wolfgang Preiser, Tulio de Oliveira                                                                                                                                       |  |
| EPI_ISL_745136                                                                                                                                                                                                                                                                                                                                                                                                                                                                                                                                                                                                                                                                                                                                                                                                                                                                                                                                                                                                                                                                                                                                                                                                                                                                                                                                                                                                                                                                                                                                                                                                                                                                                                                                                                                                                                                 | Kraaifontein CHC wc KFP                                              | National Health Laboratory Service (NHLS), Tygerberg                                      | Susan Engelbrecht, Kayla Delaney, Bronwyn Kleinhans, Houriyah Tegally, Eduan Wilkinton, Gert van Zyl, Wolfgang Preiser, Tulio de Oliveira                                                                                                                                       |  |

|                                                                                                                                                                                                                                                |                                                                                                                                                                       |                                                                                                                                                                                                                                                                                                                                                                          |                                                                                                                                                                                                                                                                                                                       |
|------------------------------------------------------------------------------------------------------------------------------------------------------------------------------------------------------------------------------------------------|-----------------------------------------------------------------------------------------------------------------------------------------------------------------------|--------------------------------------------------------------------------------------------------------------------------------------------------------------------------------------------------------------------------------------------------------------------------------------------------------------------------------------------------------------------------|-----------------------------------------------------------------------------------------------------------------------------------------------------------------------------------------------------------------------------------------------------------------------------------------------------------------------|
| EPI_ISL_745137                                                                                                                                                                                                                                 | Edameni Clinic                                                                                                                                                        | National Health Laboratory Service (NHLS), Tygerberg                                                                                                                                                                                                                                                                                                                     | Susan Engelbrecht, Kayla Delaney, Bronwyn Kleinhans, Houriyah Tegally, Eduan Wilkinton, Gert van Zyl, Wolfgang Preiser, Tulio de Oliveira                                                                                                                                                                             |
| EPI_ISL_745138, EPI_ISL_745139                                                                                                                                                                                                                 | Dr Van Niekerk Hospital                                                                                                                                               | National Health Laboratory Service (NHLS), Tygerberg                                                                                                                                                                                                                                                                                                                     | Susan Engelbrecht, Kayla Delaney, Bronwyn Kleinhans, Houriyah Tegally, Eduan Wilkinton, Gert van Zyl, Wolfgang Preiser, Tulio de Oliveira                                                                                                                                                                             |
| EPI_ISL_745140, EPI_ISL_745141                                                                                                                                                                                                                 | Tygerberg Hospital wc TBH                                                                                                                                             | National Health Laboratory Service (NHLS), Tygerberg                                                                                                                                                                                                                                                                                                                     | Susan Engelbrecht, Kayla Delaney, Bronwyn Kleinhans, Houriyah Tegally, Eduan Wilkinton, Gert van Zyl, Wolfgang Preiser, Tulio de Oliveira                                                                                                                                                                             |
| EPI_ISL_745142, EPI_ISL_745143                                                                                                                                                                                                                 | Nomangesi Jayiya Clinic                                                                                                                                               | National Health Laboratory Service (NHLS), Tygerberg                                                                                                                                                                                                                                                                                                                     | Susan Engelbrecht, Kayla Delaney, Bronwyn Kleinhans, Houriyah Tegally, Eduan Wilkinton, Gert van Zyl, Wolfgang Preiser, Tulio de Oliveira                                                                                                                                                                             |
| EPI_ISL_745144                                                                                                                                                                                                                                 | Joe Slovo Hospital                                                                                                                                                    | National Health Laboratory Service (NHLS), Tygerberg                                                                                                                                                                                                                                                                                                                     | Susan Engelbrecht, Kayla Delaney, Bronwyn Kleinhans, Houriyah Tegally, Eduan Wilkinton, Gert van Zyl, Wolfgang Preiser, Tulio de Oliveira                                                                                                                                                                             |
| EPI_ISL_745145                                                                                                                                                                                                                                 | Khayelitsha Hospital wc KHA                                                                                                                                           | National Health Laboratory Service (NHLS), Tygerberg                                                                                                                                                                                                                                                                                                                     | Susan Engelbrecht, Kayla Delaney, Bronwyn Kleinhans, Houriyah Tegally, Eduan Wilkinton, Gert van Zyl, Wolfgang Preiser, Tulio de Oliveira                                                                                                                                                                             |
| EPI_ISL_745146                                                                                                                                                                                                                                 | Vredendal Hospital wc VRE                                                                                                                                             | National Health Laboratory Service (NHLS), Tygerberg                                                                                                                                                                                                                                                                                                                     | Susan Engelbrecht, Kayla Delaney, Bronwyn Kleinhans, Houriyah Tegally, Eduan Wilkinton, Gert van Zyl, Wolfgang Preiser, Tulio de Oliveira                                                                                                                                                                             |
| EPI_ISL_745147, EPI_ISL_745148, EPI_ISL_745149, EPI_ISL_745150                                                                                                                                                                                 | Tygerberg Hospital wc TBH                                                                                                                                             | National Health Laboratory Service (NHLS), Tygerberg                                                                                                                                                                                                                                                                                                                     | Susan Engelbrecht, Kayla Delaney, Bronwyn Kleinhans, Houriyah Tegally, Eduan Wilkinton, Gert van Zyl, Wolfgang Preiser, Tulio de Oliveira                                                                                                                                                                             |
| EPI_ISL_745151                                                                                                                                                                                                                                 | Edameni Clinic                                                                                                                                                        | National Health Laboratory Service (NHLS), Tygerberg                                                                                                                                                                                                                                                                                                                     | Susan Engelbrecht, Kayla Delaney, Bronwyn Kleinhans, Houriyah Tegally, Eduan Wilkinton, Gert van Zyl, Wolfgang Preiser, Tulio de Oliveira                                                                                                                                                                             |
| EPI_ISL_745152                                                                                                                                                                                                                                 | Laelitia Bam CHC                                                                                                                                                      | National Health Laboratory Service (NHLS), Tygerberg                                                                                                                                                                                                                                                                                                                     | Susan Engelbrecht, Kayla Delaney, Bronwyn Kleinhans, Houriyah Tegally, Eduan Wilkinton, Gert van Zyl, Wolfgang Preiser, Tulio de Oliveira                                                                                                                                                                             |
| EPI_ISL_745153                                                                                                                                                                                                                                 | CoVid EC Nelson Mandela Bay Metro                                                                                                                                     | National Health Laboratory Service (NHLS), Tygerberg                                                                                                                                                                                                                                                                                                                     | Susan Engelbrecht, Kayla Delaney, Bronwyn Kleinhans, Houriyah Tegally, Eduan Wilkinton, Gert van Zyl, Wolfgang Preiser, Tulio de Oliveira                                                                                                                                                                             |
| EPI_ISL_745154                                                                                                                                                                                                                                 | Dr Ivan Toms Clinic wc IVT                                                                                                                                            | National Health Laboratory Service (NHLS), Tygerberg                                                                                                                                                                                                                                                                                                                     | Susan Engelbrecht, Kayla Delaney, Bronwyn Kleinhans, Houriyah Tegally, Eduan Wilkinton, Gert van Zyl, Wolfgang Preiser, Tulio de Oliveira                                                                                                                                                                             |
| EPI_ISL_745155                                                                                                                                                                                                                                 | Langebaan Clinic wc LBC                                                                                                                                               | National Health Laboratory Service (NHLS), Tygerberg                                                                                                                                                                                                                                                                                                                     | Susan Engelbrecht, Kayla Delaney, Bronwyn Kleinhans, Houriyah Tegally, Eduan Wilkinton, Gert van Zyl, Wolfgang Preiser, Tulio de Oliveira                                                                                                                                                                             |
| EPI_ISL_745156                                                                                                                                                                                                                                 | SAS Saldanha                                                                                                                                                          | National Health Laboratory Service (NHLS), Tygerberg                                                                                                                                                                                                                                                                                                                     | Susan Engelbrecht, Kayla Delaney, Bronwyn Kleinhans, Houriyah Tegally, Eduan Wilkinton, Gert van Zyl, Wolfgang Preiser, Tulio de Oliveira                                                                                                                                                                             |
| EPI_ISL_745157                                                                                                                                                                                                                                 | SAS Saldanha VPA                                                                                                                                                      | National Health Laboratory Service (NHLS), Tygerberg                                                                                                                                                                                                                                                                                                                     | Susan Engelbrecht, Kayla Delaney, Bronwyn Kleinhans, Houriyah Tegally, Eduan Wilkinton, Gert van Zyl, Wolfgang Preiser, Tulio de Oliveira                                                                                                                                                                             |
| EPI_ISL_745158, EPI_ISL_745159                                                                                                                                                                                                                 | Bishop Lavis CDC wc BLP                                                                                                                                               | National Health Laboratory Service (NHLS), Tygerberg                                                                                                                                                                                                                                                                                                                     | Susan Engelbrecht, Kayla Delaney, Bronwyn Kleinhans, Houriyah Tegally, Eduan Wilkinton, Gert van Zyl, Wolfgang Preiser, Tulio de Oliveira                                                                                                                                                                             |
| EPI_ISL_745160                                                                                                                                                                                                                                 | Langebaan Clinic wc LBC                                                                                                                                               | National Health Laboratory Service (NHLS), Tygerberg                                                                                                                                                                                                                                                                                                                     | Susan Engelbrecht, Kayla Delaney, Bronwyn Kleinhans, Houriyah Tegally, Eduan Wilkinton, Gert van Zyl, Wolfgang Preiser, Tulio de Oliveira                                                                                                                                                                             |
| EPI_ISL_745161                                                                                                                                                                                                                                 | SAS Saldanha VPA                                                                                                                                                      | National Health Laboratory Service (NHLS), Tygerberg                                                                                                                                                                                                                                                                                                                     | Susan Engelbrecht, Kayla Delaney, Bronwyn Kleinhans, Houriyah Tegally, Eduan Wilkinton, Gert van Zyl, Wolfgang Preiser, Tulio de Oliveira                                                                                                                                                                             |
| EPI_ISL_745162                                                                                                                                                                                                                                 | Elsies River CHC wc ERP                                                                                                                                               | National Health Laboratory Service (NHLS), Tygerberg                                                                                                                                                                                                                                                                                                                     | Susan Engelbrecht, Kayla Delaney, Bronwyn Kleinhans, Houriyah Tegally, Eduan Wilkinton, Gert van Zyl, Wolfgang Preiser, Tulio de Oliveira                                                                                                                                                                             |
| EPI_ISL_745163                                                                                                                                                                                                                                 | Khayelitsha (Site B) CHC wc KHC                                                                                                                                       | National Health Laboratory Service (NHLS), Tygerberg                                                                                                                                                                                                                                                                                                                     | Susan Engelbrecht, Kayla Delaney, Bronwyn Kleinhans, Houriyah Tegally, Eduan Wilkinton, Gert van Zyl, Wolfgang Preiser, Tulio de Oliveira                                                                                                                                                                             |
| EPI_ISL_745164                                                                                                                                                                                                                                 | Kraaifontein CHC wc KFP                                                                                                                                               | National Health Laboratory Service (NHLS), Tygerberg                                                                                                                                                                                                                                                                                                                     | Susan Engelbrecht, Kayla Delaney, Bronwyn Kleinhans, Houriyah Tegally, Eduan Wilkinton, Gert van Zyl, Wolfgang Preiser, Tulio de Oliveira                                                                                                                                                                             |
| EPI_ISL_745165                                                                                                                                                                                                                                 | Vredenburg Hospital wc VBG                                                                                                                                            | National Health Laboratory Service (NHLS), Tygerberg                                                                                                                                                                                                                                                                                                                     | Susan Engelbrecht, Kayla Delaney, Bronwyn Kleinhans, Houriyah Tegally, Eduan Wilkinton, Gert van Zyl, Wolfgang Preiser, Tulio de Oliveira                                                                                                                                                                             |
| EPI_ISL_745166                                                                                                                                                                                                                                 | Khayelitsha Hospital wc KHA                                                                                                                                           | National Health Laboratory Service (NHLS), Tygerberg                                                                                                                                                                                                                                                                                                                     | Susan Engelbrecht, Kayla Delaney, Bronwyn Kleinhans, Houriyah Tegally, Eduan Wilkinton, Gert van Zyl, Wolfgang Preiser, Tulio de Oliveira                                                                                                                                                                             |
| EPI_ISL_745167                                                                                                                                                                                                                                 | Vredenburg Hospital wc VBG                                                                                                                                            | National Health Laboratory Service (NHLS), Tygerberg                                                                                                                                                                                                                                                                                                                     | Susan Engelbrecht, Kayla Delaney, Bronwyn Kleinhans, Houriyah Tegally, Eduan Wilkinton, Gert van Zyl, Wolfgang Preiser, Tulio de Oliveira                                                                                                                                                                             |
| EPI_ISL_745168, EPI_ISL_745169                                                                                                                                                                                                                 | Bishop Lavis CDC wc BLP                                                                                                                                               | National Health Laboratory Service (NHLS), Tygerberg                                                                                                                                                                                                                                                                                                                     | Susan Engelbrecht, Kayla Delaney, Bronwyn Kleinhans, Houriyah Tegally, Eduan Wilkinton, Gert van Zyl, Wolfgang Preiser, Tulio de Oliveira                                                                                                                                                                             |
| EPI_ISL_745170                                                                                                                                                                                                                                 | Brackengate Field Hospital COVID-19 wc BRG                                                                                                                            | National Health Laboratory Service (NHLS), Tygerberg                                                                                                                                                                                                                                                                                                                     | Susan Engelbrecht, Kayla Delaney, Bronwyn Kleinhans, Houriyah Tegally, Eduan Wilkinton, Gert van Zyl, Wolfgang Preiser, Tulio de Oliveira                                                                                                                                                                             |
| EPI_ISL_745171, EPI_ISL_745172                                                                                                                                                                                                                 | Delft CHC wc DFP                                                                                                                                                      | National Health Laboratory Service (NHLS), Tygerberg                                                                                                                                                                                                                                                                                                                     | Susan Engelbrecht, Kayla Delaney, Bronwyn Kleinhans, Houriyah Tegally, Eduan Wilkinton, Gert van Zyl, Wolfgang Preiser, Tulio de Oliveira                                                                                                                                                                             |
| EPI_ISL_745173, EPI_ISL_745174, EPI_ISL_745175, EPI_ISL_745176, EPI_ISL_745177, EPI_ISL_745178                                                                                                                                                 | Eerste River Hospital wc ERH                                                                                                                                          | National Health Laboratory Service (NHLS), Tygerberg                                                                                                                                                                                                                                                                                                                     | Susan Engelbrecht, Kayla Delaney, Bronwyn Kleinhans, Houriyah Tegally, Eduan Wilkinton, Gert van Zyl, Wolfgang Preiser, Tulio de Oliveira                                                                                                                                                                             |
| EPI_ISL_745179                                                                                                                                                                                                                                 | Kraaifontein CHC wc KFP                                                                                                                                               | National Health Laboratory Service (NHLS), Tygerberg                                                                                                                                                                                                                                                                                                                     | Susan Engelbrecht, Kayla Delaney, Bronwyn Kleinhans, Houriyah Tegally, Eduan Wilkinton, Gert van Zyl, Wolfgang Preiser, Tulio de Oliveira                                                                                                                                                                             |
| EPI_ISL_745180, EPI_ISL_745181, EPI_ISL_745182, EPI_ISL_745183, EPI_ISL_745184, EPI_ISL_745185                                                                                                                                                 | Tygerberg Hospital wc TBH                                                                                                                                             | National Health Laboratory Service (NHLS), Tygerberg                                                                                                                                                                                                                                                                                                                     | Susan Engelbrecht, Kayla Delaney, Bronwyn Kleinhans, Houriyah Tegally, Eduan Wilkinton, Gert van Zyl, Wolfgang Preiser, Tulio de Oliveira                                                                                                                                                                             |
| EPI_ISL_745186                                                                                                                                                                                                                                 | Wallacedene Clinic wc WAL                                                                                                                                             | National Health Laboratory Service (NHLS), Tygerberg                                                                                                                                                                                                                                                                                                                     | Susan Engelbrecht, Kayla Delaney, Bronwyn Kleinhans, Houriyah Tegally, Eduan Wilkinton, Gert van Zyl, Wolfgang Preiser, Tulio de Oliveira                                                                                                                                                                             |
| EPI_ISL_745187                                                                                                                                                                                                                                 | Port Nolloth Hospital                                                                                                                                                 | National Health Laboratory Service (NHLS), Tygerberg                                                                                                                                                                                                                                                                                                                     | Susan Engelbrecht, Kayla Delaney, Bronwyn Kleinhans, Houriyah Tegally, Eduan Wilkinton, Gert van Zyl, Wolfgang Preiser, Tulio de Oliveira                                                                                                                                                                             |
| EPI_ISL_745188                                                                                                                                                                                                                                 | Nababeep Hospital                                                                                                                                                     | National Health Laboratory Service (NHLS), Tygerberg                                                                                                                                                                                                                                                                                                                     | Susan Engelbrecht, Kayla Delaney, Bronwyn Kleinhans, Houriyah Tegally, Eduan Wilkinton, Gert van Zyl, Wolfgang Preiser, Tulio de Oliveira                                                                                                                                                                             |
| EPI_ISL_745189                                                                                                                                                                                                                                 | Vredenburg Hospital wc VBG                                                                                                                                            | National Health Laboratory Service (NHLS), Tygerberg                                                                                                                                                                                                                                                                                                                     | Susan Engelbrecht, Kayla Delaney, Bronwyn Kleinhans, Houriyah Tegally, Eduan Wilkinton, Gert van Zyl, Wolfgang Preiser, Tulio de Oliveira                                                                                                                                                                             |
| EPI_ISL_745190                                                                                                                                                                                                                                 | Brackengate Field Hospital COVID-19 wc BRG                                                                                                                            | National Health Laboratory Service (NHLS), Tygerberg                                                                                                                                                                                                                                                                                                                     | Susan Engelbrecht, Kayla Delaney, Bronwyn Kleinhans, Houriyah Tegally, Eduan Wilkinton, Gert van Zyl, Wolfgang Preiser, Tulio de Oliveira                                                                                                                                                                             |
| EPI_ISL_763065                                                                                                                                                                                                                                 | 1-Laboratory of Microbiology, National Reference Lab, Charles Nicolle Hospital; 2-University of Tunis ElManar, Faculty of Medicine of Tunis, LR99ES09, Tunis, Tunisia | 1-Clinical and Experimental Pharmacology Lab, LR16SP02, National Center of Pharmacovigilance, University of Tunis El Manar, Tunis, Tunisia. 2-Neurodegenerative diseases and psychiatric troubles, LR18SP03, Razi Hospital, University of Tunis El Manar, Tunis, Tunisia. 3- Ministry of Health, National Observatory of New and Emerging Diseases, 1006, Tunis, Tunisia | Ilhem Boutiba-Ben Boubaker, Sameh Trabelsi, Nissaf Ben Alaya, Maher Kharrat, Alia Ben Kahla, Jalila Ben Khellil, Salma Abid, Sana Ferjani, Mouna Ben Sassi, Mouna Safer, Awatef El Moussi, Habiba Ben Romdhane, Souissi Amira, Ines Mldini, Hanen El Jebari, Asma Ferjani, Gaies Emma, Riadh Daghtous, Riadh Gouider. |
| EPI_ISL_763067                                                                                                                                                                                                                                 | 1-Laboratory of Microbiology, National Reference Lab, Charles Nicolle Hospital; 2-University of Tunis ElManar, Faculty of Medicine of Tunis, LR99ES09, Tunis, Tunisia | 1-Clinical and Experimental Pharmacology Lab, LR16SP02, National Center of Pharmacovigilance, University of Tunis El Manar, Tunis, Tunisia. 2-Neurodegenerative diseases and psychiatric troubles, LR18SP03, Razi Hospital, University of Tunis El Manar, Tunis, Tunisia. 3- Ministry of Health, National Observatory of New and Emerging Diseases, 1006, Tunis, Tunisia | Ilhem Boutiba-Ben Boubaker, Sameh Trabelsi, Nissaf Ben Alaya, Maher Kharrat, Alia Ben Kahla, Jalila Ben Khellil, Salma Abid, Sana Ferjani, Mouna Ben Sassi, Mouna Safer, Awatef El MOussi, Habiba Ben Romdhane, Souissi Amira, Ines Mldini, Hanen El Jebari, Asma Ferjani, Gaies Emma, Riadh Daghtous, Riadh Gouider. |
| EPI_ISL_766049                                                                                                                                                                                                                                 | Nigeria Centre for Disease Control (NCDC), National Reference Laboratory (NRL)                                                                                        | National Reference Laboratory, NCDC, Abuja                                                                                                                                                                                                                                                                                                                               | Olusola Akanbi, Chimaobi Chukwu, Dr Omoare Adesuyi, Mrs Nwando Mba, Dr Ndodo Nnaemeka, Dr Chikwe Ihekweazu                                                                                                                                                                                                            |
| EPI_ISL_766051                                                                                                                                                                                                                                 | Nigeria Centre For Disease Control,                                                                                                                                   | National reference Laboratory, NCDC, Gaduwa, Abuja                                                                                                                                                                                                                                                                                                                       | Dr Ndodo Nnaemeka, Olusola Akanbi, Chimaobi Chukwu, Dr Omoare Adesuyi, Kingsley Madubuike, Anthony Ahumibe, Naidoo Dhamari, Nwando Mba, Dr Chikwe Ihekweazu                                                                                                                                                           |
| EPI_ISL_766861, EPI_ISL_766862, EPI_ISL_766863, EPI_ISL_766864, EPI_ISL_766865, EPI_ISL_766866, EPI_ISL_766867, EPI_ISL_766868, EPI_ISL_766869, EPI_ISL_766870, EPI_ISL_766871, EPI_ISL_766872, EPI_ISL_766873, EPI_ISL_766874, EPI_ISL_766875 | see above                                                                                                                                                             | NIC Viral Respiratory Unit - Institut Pasteur of Algeria                                                                                                                                                                                                                                                                                                                 | Mélanie Albert, Marion Barbet, Sylvie Behillil, Méline Bizard, Angela Brisebarre, Flora Donati, Etienne Simon-Lorière, Vincent Enouf, Maud Vanpeene, Sylvie van der Werf, Fawzi Derrar                                                                                                                                |
| EPI_ISL_768831, EPI_ISL_768832, EPI_ISL_768834, EPI_ISL_768835, EPI_ISL_768836, EPI_ISL_768837, EPI_ISL_768839, EPI_ISL_768840, EPI_ISL_769863                                                                                                 | Laboratoire Biolife                                                                                                                                                   | Laboratoire de Biotechnologie                                                                                                                                                                                                                                                                                                                                            | Mouna Ouadghiri, Tarik Aanniz, Mohammed Walid Chemaou Elifhiri, Mohamed Chenaoui, Hanae Dakka, Afaf Alaoui, Otmane Touzani, Amina Benouda, Bouchra Belfquih, Lahcen belyamani, Saaid Amzazi and Azeddine Ibrahim                                                                                                      |
| EPI_ISL_770470, EPI_ISL_770471,                                                                                                                                                                                                                | National Health laboratory                                                                                                                                            | Botswana Institute for Technology Research and Innovation                                                                                                                                                                                                                                                                                                                | Kefentse Arnold Tumedu, Madisa Mine, Dineo Emang Tshiamo. Gape Nyepetsi, Thongbotho Mphoyakgosi, Malebogo Kebabonye, Maitshwarelo Ignatius                                                                                                                                                                            |

|                                                                                                                                                                                                                                                                                                                                                                                                                                                                                                                                                                                                                                                                                                                                                                                                                                                                                                                                                                                                                                                                                                                                                                                                                                                                                                                                                                                                                                                                                                                                                                                                                                                                                                                                                                                                                                                                                                                                                                                                                                                                                                                                                                                                                                                                                                                                                                                                                                                                                                                                                                                                                                                                                                                                                                                                                                |                                                                                                                                                                     |                                                                                                                                                                                                                                                                                                                                                                        |                                                                                                                                                                                                                                                                                                                                                                    |
|--------------------------------------------------------------------------------------------------------------------------------------------------------------------------------------------------------------------------------------------------------------------------------------------------------------------------------------------------------------------------------------------------------------------------------------------------------------------------------------------------------------------------------------------------------------------------------------------------------------------------------------------------------------------------------------------------------------------------------------------------------------------------------------------------------------------------------------------------------------------------------------------------------------------------------------------------------------------------------------------------------------------------------------------------------------------------------------------------------------------------------------------------------------------------------------------------------------------------------------------------------------------------------------------------------------------------------------------------------------------------------------------------------------------------------------------------------------------------------------------------------------------------------------------------------------------------------------------------------------------------------------------------------------------------------------------------------------------------------------------------------------------------------------------------------------------------------------------------------------------------------------------------------------------------------------------------------------------------------------------------------------------------------------------------------------------------------------------------------------------------------------------------------------------------------------------------------------------------------------------------------------------------------------------------------------------------------------------------------------------------------------------------------------------------------------------------------------------------------------------------------------------------------------------------------------------------------------------------------------------------------------------------------------------------------------------------------------------------------------------------------------------------------------------------------------------------------|---------------------------------------------------------------------------------------------------------------------------------------------------------------------|------------------------------------------------------------------------------------------------------------------------------------------------------------------------------------------------------------------------------------------------------------------------------------------------------------------------------------------------------------------------|--------------------------------------------------------------------------------------------------------------------------------------------------------------------------------------------------------------------------------------------------------------------------------------------------------------------------------------------------------------------|
| EPI_ISL_770472, EPI_ISL_770473, EPI_ISL_770474                                                                                                                                                                                                                                                                                                                                                                                                                                                                                                                                                                                                                                                                                                                                                                                                                                                                                                                                                                                                                                                                                                                                                                                                                                                                                                                                                                                                                                                                                                                                                                                                                                                                                                                                                                                                                                                                                                                                                                                                                                                                                                                                                                                                                                                                                                                                                                                                                                                                                                                                                                                                                                                                                                                                                                                 |                                                                                                                                                                     |                                                                                                                                                                                                                                                                                                                                                                        | Matsheka                                                                                                                                                                                                                                                                                                                                                           |
| EPI_ISL_770475                                                                                                                                                                                                                                                                                                                                                                                                                                                                                                                                                                                                                                                                                                                                                                                                                                                                                                                                                                                                                                                                                                                                                                                                                                                                                                                                                                                                                                                                                                                                                                                                                                                                                                                                                                                                                                                                                                                                                                                                                                                                                                                                                                                                                                                                                                                                                                                                                                                                                                                                                                                                                                                                                                                                                                                                                 | National health Laboratory                                                                                                                                          | Botswana Institute for Technology Research and Innovation                                                                                                                                                                                                                                                                                                              | Kefentse Arnold Tumedi, Madisa Mine, Dineo Emang Tshiamo. Gape Nyepetsi, Thongbotho Mphoyakgosi, Malebogo Kebabonye, Maitshwarelo Ignatius Matsheka                                                                                                                                                                                                                |
| EPI_ISL_775219, EPI_ISL_775220, EPI_ISL_775221, EPI_ISL_775222, EPI_ISL_775223, EPI_ISL_775224, EPI_ISL_775225, EPI_ISL_775226, EPI_ISL_775247, EPI_ISL_775249, EPI_ISL_775250, EPI_ISL_775252, EPI_ISL_775254, EPI_ISL_775256, EPI_ISL_775258, EPI_ISL_775260, EPI_ISL_775262, EPI_ISL_775263, EPI_ISL_775264, EPI_ISL_775265                                                                                                                                                                                                                                                                                                                                                                                                                                                                                                                                                                                                                                                                                                                                                                                                                                                                                                                                                                                                                                                                                                                                                                                                                                                                                                                                                                                                                                                                                                                                                                                                                                                                                                                                                                                                                                                                                                                                                                                                                                                                                                                                                                                                                                                                                                                                                                                                                                                                                                 |                                                                                                                                                                     |                                                                                                                                                                                                                                                                                                                                                                        |                                                                                                                                                                                                                                                                                                                                                                    |
| see above                                                                                                                                                                                                                                                                                                                                                                                                                                                                                                                                                                                                                                                                                                                                                                                                                                                                                                                                                                                                                                                                                                                                                                                                                                                                                                                                                                                                                                                                                                                                                                                                                                                                                                                                                                                                                                                                                                                                                                                                                                                                                                                                                                                                                                                                                                                                                                                                                                                                                                                                                                                                                                                                                                                                                                                                                      | Laboratoire Biolife                                                                                                                                                 | Laboratoire de Biotechnologie                                                                                                                                                                                                                                                                                                                                          | Mouna Ouadghiri, Tarik Aanniz, Mohammed Walid Chemaou Elifhiri, Mohamed Chenauai, Hanae Dakka, Afaf Alaoui, Otmane Touzani, Amina Benouda, Bouchra Belfquih, Lahcen belyamani, Saaid Amzazi and Azzedine Ibrahimi                                                                                                                                                  |
| EPI_ISL_788933, EPI_ISL_788934, EPI_ISL_788935, EPI_ISL_788936                                                                                                                                                                                                                                                                                                                                                                                                                                                                                                                                                                                                                                                                                                                                                                                                                                                                                                                                                                                                                                                                                                                                                                                                                                                                                                                                                                                                                                                                                                                                                                                                                                                                                                                                                                                                                                                                                                                                                                                                                                                                                                                                                                                                                                                                                                                                                                                                                                                                                                                                                                                                                                                                                                                                                                 | Centre de Recherche et de Formation en Infectiologie Guiné                                                                                                          | TransVIHMI, IRD/INSERM/Monpellier University                                                                                                                                                                                                                                                                                                                           | Alpha Kabinet KEITA, Abdoul Karim SOUMAH, Abdoulaye TOURE, Moriba POVOGUI, Joel KOIVOGUI, Jean-louis MONEMOU, Mamadou Saliou SOW, Penda Malhado DIALLO, Mamadou Bhoeye KEITA, Alimou CAMARA, Kaba KOUROUMA, Mandiou DIAKITE, Mamadou Saliou BAH, Sakoba KEITA, Bouna Yatassaye, Christelle BUTEL, Laetitia SERRANO, Ahidjo AYOUBA, Eric DELAPORTE, Martine PEETERS |
| EPI_ISL_788937                                                                                                                                                                                                                                                                                                                                                                                                                                                                                                                                                                                                                                                                                                                                                                                                                                                                                                                                                                                                                                                                                                                                                                                                                                                                                                                                                                                                                                                                                                                                                                                                                                                                                                                                                                                                                                                                                                                                                                                                                                                                                                                                                                                                                                                                                                                                                                                                                                                                                                                                                                                                                                                                                                                                                                                                                 | Centre de Recherche et de Formation en Infectiologie Guiné                                                                                                          | TransVIHMI, IRD/INSERM/Monpellier University                                                                                                                                                                                                                                                                                                                           | Alpha Kabinet KEITA, Abdoul Karim SOUMAH, Abdoulaye TOURE, Moriba POVOGUI, Joel KOIVOGUI, Jean-louis MONEMOU, Mamadou Saliou SOW, Penda Malhado DIALLO, Mamadou Bhoeye KEITA, Alimou CAMARA, Kaba KOUROUMA, Mandiou DIAKITE, Mamadou Saliou BAH, Sakoba KEITA, Bouna                                                                                               |
| EPI_ISL_788938                                                                                                                                                                                                                                                                                                                                                                                                                                                                                                                                                                                                                                                                                                                                                                                                                                                                                                                                                                                                                                                                                                                                                                                                                                                                                                                                                                                                                                                                                                                                                                                                                                                                                                                                                                                                                                                                                                                                                                                                                                                                                                                                                                                                                                                                                                                                                                                                                                                                                                                                                                                                                                                                                                                                                                                                                 | Centre de Recherche et de Formation en Infectiologie Guiné                                                                                                          | TransVIHMI, IRD/INSERM/Monpellier University                                                                                                                                                                                                                                                                                                                           | Alpha Kabinet KEITA, Abdoul Karim SOUMAH, Abdoulaye TOURE, Moriba POVOGUI, Joel KOIVOGUI, Jean-louis MONEMOU, Mamadou Saliou SOW, Penda Malhado DIALLO, Mamadou Bhoeye KEITA, Alimou CAMARA, Kaba KOUROUMA, Mandiou DIAKITE, Mamadou Saliou BAH, Sakoba KEITA, Bouna Yatassaye, Christelle BUTEL, Laetitia SERRANO, Ahidjo AYOUBA, Eric DELAPORTE, Martine PEETERS |
| EPI_ISL_794593, EPI_ISL_794594, EPI_ISL_794595, EPI_ISL_794596, EPI_ISL_794597, EPI_ISL_794598, EPI_ISL_794599                                                                                                                                                                                                                                                                                                                                                                                                                                                                                                                                                                                                                                                                                                                                                                                                                                                                                                                                                                                                                                                                                                                                                                                                                                                                                                                                                                                                                                                                                                                                                                                                                                                                                                                                                                                                                                                                                                                                                                                                                                                                                                                                                                                                                                                                                                                                                                                                                                                                                                                                                                                                                                                                                                                 | Central Laboratories, Egyptian Ministry of Health and Population                                                                                                    | Central Laboratories, Egyptian Ministry of Health and Population                                                                                                                                                                                                                                                                                                       | Roshdy,W.H., Kayed,A.E., Mostafa,A., El-Shesheny,R., Khalifa,M.K., Shehata,M., Shawky,S., Saleh,M., Gomaa,M., El Taweel,A., Mahmoud,S.H., Moatasim,Y., Kulkat,O., Kamel,M.N., Mahrous,N., El Sayes,M.A., El Guindy,N.M., Naguib,A., Kandeil,A., Kayali,G., Ali,M.A.                                                                                                |
| EPI_ISL_794600, EPI_ISL_794601, EPI_ISL_794602, EPI_ISL_794603, EPI_ISL_794604                                                                                                                                                                                                                                                                                                                                                                                                                                                                                                                                                                                                                                                                                                                                                                                                                                                                                                                                                                                                                                                                                                                                                                                                                                                                                                                                                                                                                                                                                                                                                                                                                                                                                                                                                                                                                                                                                                                                                                                                                                                                                                                                                                                                                                                                                                                                                                                                                                                                                                                                                                                                                                                                                                                                                 | Central Laboratories, Egyptian Ministry of Health and Population                                                                                                    | Central Laboratories, Egyptian Ministry of Health and Population                                                                                                                                                                                                                                                                                                       | Kayed,A.E., Roshdy,W.H., El-Shesheny,R., Mostafa,A., Khalifa,M.K., Shehata,M., Shawky,S., Saleh,M., Gomaa,M., El Taweel,A., Mahmoud,S.H., Moatasim,Y., Kulkat,O., Kamel,M.N., Mahrous,N., El Sayes,M.A., El Guindy,N.M., Naguib,A., Kandeil,A., Kayali,G., Ali,M.A.                                                                                                |
| EPI_ISL_794605, EPI_ISL_794606, EPI_ISL_794607, EPI_ISL_794608                                                                                                                                                                                                                                                                                                                                                                                                                                                                                                                                                                                                                                                                                                                                                                                                                                                                                                                                                                                                                                                                                                                                                                                                                                                                                                                                                                                                                                                                                                                                                                                                                                                                                                                                                                                                                                                                                                                                                                                                                                                                                                                                                                                                                                                                                                                                                                                                                                                                                                                                                                                                                                                                                                                                                                 | Central Public Health Laboratories, Egyptian Ministry of Health and Population                                                                                      | Central Public Health Laboratories, Egyptian Ministry of Health and Population                                                                                                                                                                                                                                                                                         | El-Shesheny,R., Roshdy,W.H., Kayed,A.E., Mostafa,A., Khalifa,M.K., Shehata,M., Shawky,S., Saleh,M., Gomaa,M., El Taweel,A., Mahmoud,S.H., Moatasim,Y., Kulkat,O., Kamel,M.N., Mahrous,N., El Sayes,M.A., El Guindy,N.M., Naguib,A., Kandeil,A., Kayali,G., Ali,M.A.                                                                                                |
| EPI_ISL_794634                                                                                                                                                                                                                                                                                                                                                                                                                                                                                                                                                                                                                                                                                                                                                                                                                                                                                                                                                                                                                                                                                                                                                                                                                                                                                                                                                                                                                                                                                                                                                                                                                                                                                                                                                                                                                                                                                                                                                                                                                                                                                                                                                                                                                                                                                                                                                                                                                                                                                                                                                                                                                                                                                                                                                                                                                 | Biology, MCL                                                                                                                                                        | Biology, MCL                                                                                                                                                                                                                                                                                                                                                           | Seadawy,M.G., Shamel,M.D., El-hosieny,M.F., Gad,A.F., EL-harty,B.S. and EL-Safy,A.S.                                                                                                                                                                                                                                                                               |
| EPI_ISL_796782                                                                                                                                                                                                                                                                                                                                                                                                                                                                                                                                                                                                                                                                                                                                                                                                                                                                                                                                                                                                                                                                                                                                                                                                                                                                                                                                                                                                                                                                                                                                                                                                                                                                                                                                                                                                                                                                                                                                                                                                                                                                                                                                                                                                                                                                                                                                                                                                                                                                                                                                                                                                                                                                                                                                                                                                                 | Laboratory of Microbiology, National Reference Lab, Charles Nicolle Hospital; 2-University of Tunis ElManar, Faculty of Medicine of Tunis, LR99ES09, Tunis, Tunisia | Clinical and Experimental Pharmacology Lab, LR18SP02, National Center of Pharmacovigilance, University of Tunis El Manar, Tunis, Tunisia. 2-Neurodegenerative diseases and psychiatric troubles, LR18SP03, Razi Hospital, University of Tunis El Manar, Tunis, Tunisia. 3- Ministry of Health, National Observatory of New and Emerging Diseases, 1006, Tunis, Tunisia | Ilhem Boutiba-Ben Boubaker, Sameh Trabelsi, Nissaf Ben Alaya, Maher Kharrat, Alia BenKahla, Jalila Ben Khelil, Salma Abid, Sana Ferjani, Mouna Ben Sassi, Mouna Safer, Zaineb Hamzaoui, Guedi Ali Barreh, Habiba Ben Romdhane, Souissi Amira, Sarra Chamman, Hanen El Jebari, Ahmed Fakhfakh, Gaies Emna, Riadh Daghtous, Riadh Gouider.                           |
| EPI_ISL_803817                                                                                                                                                                                                                                                                                                                                                                                                                                                                                                                                                                                                                                                                                                                                                                                                                                                                                                                                                                                                                                                                                                                                                                                                                                                                                                                                                                                                                                                                                                                                                                                                                                                                                                                                                                                                                                                                                                                                                                                                                                                                                                                                                                                                                                                                                                                                                                                                                                                                                                                                                                                                                                                                                                                                                                                                                 | Laboratory of Microbiology, National Reference Lab, Charles Nicolle Hospital; 2-University of Tunis ElManar, Faculty of Medicine of Tunis, LR99ES09, Tunis, Tunisia | Clinical and Experimental Pharmacology Lab, LR18SP02, National Center of Pharmacovigilance, University of Tunis El Manar, Tunis, Tunisia. 2-Neurodegenerative diseases and psychiatric troubles, LR18SP03, Razi Hospital, University of Tunis El Manar, Tunis, Tunisia. 3- Ministry of Health, National Observatory of New and Emerging Diseases, 1006, Tunis, Tunisia | Ilhem Boutiba-Ben Boubaker, Sameh Trabelsi, Nissaf Ben Alaya, Maher Kharrat, Alia BenKahla, Jalila Ben Khelil, Salma Abid, Sana Ferjani, Mouna Ben Sassi, Mouna Safer, Zaineb Hamzaoui, Habiba Ben Romdhane, Souissi Amira, Sarra Chamman, Hanen El Jebari, Ahmed Fakhfakh, Gaies Emna, Riadh Daghtous, Riadh Gouider.                                             |
| EPI_ISL_806548, EPI_ISL_806549, EPI_ISL_806550, EPI_ISL_806551, EPI_ISL_806552, EPI_ISL_806553, EPI_ISL_806554, EPI_ISL_806555, EPI_ISL_806556, EPI_ISL_806557, EPI_ISL_806558, EPI_ISL_806559, EPI_ISL_806560, EPI_ISL_806561, EPI_ISL_806562, EPI_ISL_806563, EPI_ISL_806564, EPI_ISL_806565, EPI_ISL_806566, EPI_ISL_806567, EPI_ISL_806568, EPI_ISL_806569, EPI_ISL_806570, EPI_ISL_806571, EPI_ISL_806572, EPI_ISL_806573, EPI_ISL_806574, EPI_ISL_806575, EPI_ISL_806576, EPI_ISL_806577, EPI_ISL_806578, EPI_ISL_806579, EPI_ISL_806580, EPI_ISL_806581, EPI_ISL_806582, EPI_ISL_806583, EPI_ISL_806584, EPI_ISL_806585, EPI_ISL_806586, EPI_ISL_806587, EPI_ISL_806588, EPI_ISL_806589, EPI_ISL_806590, EPI_ISL_806591, EPI_ISL_806592, EPI_ISL_806593, EPI_ISL_806594, EPI_ISL_806595, EPI_ISL_806596, EPI_ISL_806597, EPI_ISL_806598, EPI_ISL_806599, EPI_ISL_806600, EPI_ISL_806601, EPI_ISL_806602, EPI_ISL_806603, EPI_ISL_806604, EPI_ISL_806605, EPI_ISL_806606, EPI_ISL_806607, EPI_ISL_806608, EPI_ISL_806609, EPI_ISL_806610, EPI_ISL_806611, EPI_ISL_806612, EPI_ISL_806613, EPI_ISL_806614, EPI_ISL_806615, EPI_ISL_806616, EPI_ISL_806617, EPI_ISL_806618, EPI_ISL_806619, EPI_ISL_806620, EPI_ISL_806621, EPI_ISL_806622, EPI_ISL_806623, EPI_ISL_806624, EPI_ISL_806625, EPI_ISL_806626, EPI_ISL_806627, EPI_ISL_806628, EPI_ISL_806629, EPI_ISL_806630, EPI_ISL_806631, EPI_ISL_806632, EPI_ISL_806633, EPI_ISL_806634, EPI_ISL_806635, EPI_ISL_806636, EPI_ISL_806637, EPI_ISL_806638, EPI_ISL_806639, EPI_ISL_806640, EPI_ISL_806641, EPI_ISL_806642, EPI_ISL_806643, EPI_ISL_806644, EPI_ISL_806645, EPI_ISL_806646, EPI_ISL_806647, EPI_ISL_806648, EPI_ISL_806649, EPI_ISL_806650, EPI_ISL_806651, EPI_ISL_806652, EPI_ISL_806653, EPI_ISL_806654, EPI_ISL_806655, EPI_ISL_806656, EPI_ISL_806657, EPI_ISL_806658, EPI_ISL_806659, EPI_ISL_806660, EPI_ISL_806661, EPI_ISL_806662, EPI_ISL_806663, EPI_ISL_806664, EPI_ISL_806665, EPI_ISL_806666, EPI_ISL_806667, EPI_ISL_806668, EPI_ISL_806669, EPI_ISL_806670, EPI_ISL_806671, EPI_ISL_806672, EPI_ISL_806673, EPI_ISL_806674, EPI_ISL_806675, EPI_ISL_806676, EPI_ISL_806677, EPI_ISL_806678, EPI_ISL_806679, EPI_ISL_806680, EPI_ISL_806681, EPI_ISL_806682, EPI_ISL_806683, EPI_ISL_806684, EPI_ISL_806685, EPI_ISL_806686, EPI_ISL_806687, EPI_ISL_806688, EPI_ISL_806689, EPI_ISL_806690, EPI_ISL_806691, EPI_ISL_806692, EPI_ISL_806693, EPI_ISL_806694, EPI_ISL_806695, EPI_ISL_806696, EPI_ISL_806697, EPI_ISL_806698, EPI_ISL_806699, EPI_ISL_806700, EPI_ISL_806701, EPI_ISL_806702, EPI_ISL_806703, EPI_ISL_806704, EPI_ISL_806705, EPI_ISL_806706, EPI_ISL_806707, EPI_ISL_806708, EPI_ISL_806709, EPI_ISL_806710, EPI_ISL_806711, EPI_ISL_806712, EPI_ISL_806713, EPI_ISL_806714, EPI_ISL_806715, EPI_ISL_806716, EPI_ISL_806717 |                                                                                                                                                                     |                                                                                                                                                                                                                                                                                                                                                                        |                                                                                                                                                                                                                                                                                                                                                                    |
| see above                                                                                                                                                                                                                                                                                                                                                                                                                                                                                                                                                                                                                                                                                                                                                                                                                                                                                                                                                                                                                                                                                                                                                                                                                                                                                                                                                                                                                                                                                                                                                                                                                                                                                                                                                                                                                                                                                                                                                                                                                                                                                                                                                                                                                                                                                                                                                                                                                                                                                                                                                                                                                                                                                                                                                                                                                      | KEMRI-Wellcome Trust Research Programme/KEMRI-CGMR-C Kilifi                                                                                                         | KEMRI-Wellcome Trust Research Programme/KEMRI-CGMR-C Kilifi                                                                                                                                                                                                                                                                                                            | Githinji et al                                                                                                                                                                                                                                                                                                                                                     |
| EPI_ISL_810971, EPI_ISL_810972, EPI_ISL_810973, EPI_ISL_810974, EPI_ISL_810975, EPI_ISL_810976, EPI_ISL_810977, EPI_ISL_810978, EPI_ISL_810979, EPI_ISL_810980, EPI_ISL_810981, EPI_ISL_810982, EPI_ISL_810983, EPI_ISL_810984, EPI_ISL_810985, EPI_ISL_810986, EPI_ISL_810987, EPI_ISL_810988, EPI_ISL_810989, EPI_ISL_810990, EPI_ISL_810991, EPI_ISL_810992, EPI_ISL_810993, EPI_ISL_810994, EPI_ISL_810995, EPI_ISL_810996, EPI_ISL_810997, EPI_ISL_810998, EPI_ISL_810999, EPI_ISL_811000, EPI_ISL_811001, EPI_ISL_811002, EPI_ISL_811003, EPI_ISL_811004, EPI_ISL_811005, EPI_ISL_811006, EPI_ISL_811007, EPI_ISL_811008, EPI_ISL_811009, EPI_ISL_811010, EPI_ISL_811011, EPI_ISL_811012, EPI_ISL_811013, EPI_ISL_811014, EPI_ISL_811015, EPI_ISL_811016, EPI_ISL_811017, EPI_ISL_811018, EPI_ISL_811019, EPI_ISL_811020, EPI_ISL_811021, EPI_ISL_811022, EPI_ISL_811023, EPI_ISL_811024, EPI_ISL_811025, EPI_ISL_811026, EPI_ISL_811027, EPI_ISL_811028, EPI_ISL_811029, EPI_ISL_811030, EPI_ISL_811031, EPI_ISL_811032, EPI_ISL_811033, EPI_ISL_811034, EPI_ISL_811035, EPI_ISL_811036, EPI_ISL_811037                                                                                                                                                                                                                                                                                                                                                                                                                                                                                                                                                                                                                                                                                                                                                                                                                                                                                                                                                                                                                                                                                                                                                                                                                                                                                                                                                                                                                                                                                                                                                                                                                                                                                                                 |                                                                                                                                                                     |                                                                                                                                                                                                                                                                                                                                                                        |                                                                                                                                                                                                                                                                                                                                                                    |
| see above                                                                                                                                                                                                                                                                                                                                                                                                                                                                                                                                                                                                                                                                                                                                                                                                                                                                                                                                                                                                                                                                                                                                                                                                                                                                                                                                                                                                                                                                                                                                                                                                                                                                                                                                                                                                                                                                                                                                                                                                                                                                                                                                                                                                                                                                                                                                                                                                                                                                                                                                                                                                                                                                                                                                                                                                                      | MRCG at LSHTM Genomics lab                                                                                                                                          | MRCG at LSHTM Genomics lab                                                                                                                                                                                                                                                                                                                                             | Abdul Karim sesay, Abdoulie Kante, Jarra Manneh, Mariama Kujabi, Bakary Sanyang                                                                                                                                                                                                                                                                                    |
| EPI_ISL_811145                                                                                                                                                                                                                                                                                                                                                                                                                                                                                                                                                                                                                                                                                                                                                                                                                                                                                                                                                                                                                                                                                                                                                                                                                                                                                                                                                                                                                                                                                                                                                                                                                                                                                                                                                                                                                                                                                                                                                                                                                                                                                                                                                                                                                                                                                                                                                                                                                                                                                                                                                                                                                                                                                                                                                                                                                 | Laboratory of Microbiology, National Reference Lab, Charles Nicolle Hospital; 2-University of Tunis ElManar, Faculty of Medicine of Tunis, LR99ES09, Tunis, Tunisia | Clinical and Experimental Pharmacology Lab, LR18SP02, National Center of Pharmacovigilance, University of Tunis El Manar, Tunis, Tunisia. 2-Neurodegenerative diseases and psychiatric troubles, LR18SP03, Razi Hospital, University of Tunis El Manar, Tunis, Tunisia. 3- Ministry of Health, National Observatory of New and Emerging Diseases, 1006, Tunis, Tunisia | Ilhem Boutiba-Ben Boubaker, Sameh Trabelsi, Nissaf Ben Alaya, Maher Kharrat, Alia Ben Kahla, Jalila Ben Khelil, Salma Abid, Sana Ferjani, Mouna Ben Sassi, Mouna Safer, Awatef El Moussi, Habiba Ben Romdhane, Souissi Amira, Ines Mdi, Hanen El Jebari, Asma Ferjani, Gaies Emna, Riadh Daghtous, Riadh Gouider.                                                  |
| EPI_ISL_812783, EPI_ISL_812784, EPI_ISL_812785, EPI_ISL_812786, EPI_ISL_812787, EPI_ISL_812788, EPI_ISL_812789, EPI_ISL_812790, EPI_ISL_812791, EPI_ISL_812792, EPI_ISL_812793, EPI_ISL_812794, EPI_ISL_812795, EPI_ISL_812796, EPI_ISL_812797, EPI_ISL_812798, EPI_ISL_812799, EPI_ISL_812800, EPI_ISL_812801, EPI_ISL_812802, EPI_ISL_812803, EPI_ISL_812804, EPI_ISL_812805, EPI_ISL_812806, EPI_ISL_812807, EPI_ISL_812808, EPI_ISL_812809, EPI_ISL_812810, EPI_ISL_812811, EPI_ISL_812812, EPI_ISL_812813, EPI_ISL_812814, EPI_ISL_812815, EPI_ISL_812816, EPI_ISL_812817, EPI_ISL_812818, EPI_ISL_812819, EPI_ISL_812820, EPI_ISL_812821, EPI_ISL_812822, EPI_ISL_812823, EPI_ISL_812824, EPI_ISL_812825, EPI_ISL_812826, EPI_ISL_812827, EPI_ISL_812828, EPI_ISL_812829, EPI_ISL_812830, EPI_ISL_812831, EPI_ISL_812832, EPI_ISL_812833, EPI_ISL_812834, EPI_ISL_812835, EPI_ISL_812836, EPI_ISL_812837, EPI_ISL_812838, EPI_ISL_812839, EPI_ISL_812840, EPI_ISL_812841, EPI_ISL_812842, EPI_ISL_812843, EPI_ISL_812844, EPI_ISL_812845, EPI_ISL_812846, EPI_ISL_812847, EPI_ISL_812848, EPI_ISL_812849, EPI_ISL_812850, EPI_ISL_812851, EPI_ISL_812852, EPI_ISL_812853, EPI_ISL_812854, EPI_ISL_812855, EPI_ISL_812856, EPI_ISL_812857, EPI_ISL_812858, EPI_ISL_812859, EPI_ISL_812860, EPI_ISL_812861, EPI_ISL_812862, EPI_ISL_812863, EPI_ISL_812864, EPI_ISL_812865, EPI_ISL_812866, EPI_ISL_812867, EPI_ISL_812868, EPI_ISL_812869, EPI_ISL_812870, EPI_ISL_812871, EPI_ISL_812872                                                                                                                                                                                                                                                                                                                                                                                                                                                                                                                                                                                                                                                                                                                                                                                                                                                                                                                                                                                                                                                                                                                                                                                                                                                                                                                                 |                                                                                                                                                                     |                                                                                                                                                                                                                                                                                                                                                                        |                                                                                                                                                                                                                                                                                                                                                                    |
| see above                                                                                                                                                                                                                                                                                                                                                                                                                                                                                                                                                                                                                                                                                                                                                                                                                                                                                                                                                                                                                                                                                                                                                                                                                                                                                                                                                                                                                                                                                                                                                                                                                                                                                                                                                                                                                                                                                                                                                                                                                                                                                                                                                                                                                                                                                                                                                                                                                                                                                                                                                                                                                                                                                                                                                                                                                      | Genomics Program, Children Cancer Hospital                                                                                                                          | Genomics Program, Children Cancer Hospital                                                                                                                                                                                                                                                                                                                             | Hatem,A., Hadad,A., Abouelnaga,S., Amer,K., Salah,H., Farawyla,H., Halafawy,A., Mansour,T., shalaby,L., Hassan,W., Soliman,M., Gomaa,C., Hassan,R., Soliman,S., Monuir,G., Hammad,M., Hussein,S., Abdo,I., Jalal,D., El-Zayat,M., El-Shaqnery,H., Diab,A., Bakry,U., Samir,O., Magdeldin,S., Sayed.A.                                                              |
| EPI_ISL_812966, EPI_ISL_812967                                                                                                                                                                                                                                                                                                                                                                                                                                                                                                                                                                                                                                                                                                                                                                                                                                                                                                                                                                                                                                                                                                                                                                                                                                                                                                                                                                                                                                                                                                                                                                                                                                                                                                                                                                                                                                                                                                                                                                                                                                                                                                                                                                                                                                                                                                                                                                                                                                                                                                                                                                                                                                                                                                                                                                                                 | University Clinical Research Center, University of Sciences                                                                                                         | University Clinical Research Center, University of Sciences                                                                                                                                                                                                                                                                                                            | Diarra,B., Kone,A., Guindo,I., Bane,S., Diakite,M., Dao,S., Iknane,A.A., Doumbia,S.                                                                                                                                                                                                                                                                                |
| EPI_ISL_815255                                                                                                                                                                                                                                                                                                                                                                                                                                                                                                                                                                                                                                                                                                                                                                                                                                                                                                                                                                                                                                                                                                                                                                                                                                                                                                                                                                                                                                                                                                                                                                                                                                                                                                                                                                                                                                                                                                                                                                                                                                                                                                                                                                                                                                                                                                                                                                                                                                                                                                                                                                                                                                                                                                                                                                                                                 | Centogene                                                                                                                                                           | Centogene                                                                                                                                                                                                                                                                                                                                                              | Peter Bauer, Krishna Kumar Kandaswamy, Vivi Hue-Trang Lieu                                                                                                                                                                                                                                                                                                         |
| EPI_ISL_825090, EPI_ISL_825091, EPI_ISL_825092, EPI_ISL_825093, EPI_ISL_825094, EPI_ISL_825095, EPI_ISL_825096, EPI_ISL_825097, EPI_ISL_825098, EPI_ISL_825099, EPI_ISL_825100, EPI_ISL_825101, EPI_ISL_825102, EPI_ISL_825103, EPI_ISL_825104, EPI_ISL_825105, EPI_ISL_825106, EPI_ISL_825107,                                                                                                                                                                                                                                                                                                                                                                                                                                                                                                                                                                                                                                                                                                                                                                                                                                                                                                                                                                                                                                                                                                                                                                                                                                                                                                                                                                                                                                                                                                                                                                                                                                                                                                                                                                                                                                                                                                                                                                                                                                                                                                                                                                                                                                                                                                                                                                                                                                                                                                                                |                                                                                                                                                                     |                                                                                                                                                                                                                                                                                                                                                                        |                                                                                                                                                                                                                                                                                                                                                                    |

|                                                                                                                                                                                                                                                                                                                                                                                                                                                                                                                                                                                                                                                                                                                                                                                                                                                                                                                                                                                                                                                                                                                                                                                                                                                                                                                                                                                                |           |                                                                                                                                                     |                                                                                                                                                     |                                                                                                                                                                                                                                                                                                                                                                                                                                   |
|------------------------------------------------------------------------------------------------------------------------------------------------------------------------------------------------------------------------------------------------------------------------------------------------------------------------------------------------------------------------------------------------------------------------------------------------------------------------------------------------------------------------------------------------------------------------------------------------------------------------------------------------------------------------------------------------------------------------------------------------------------------------------------------------------------------------------------------------------------------------------------------------------------------------------------------------------------------------------------------------------------------------------------------------------------------------------------------------------------------------------------------------------------------------------------------------------------------------------------------------------------------------------------------------------------------------------------------------------------------------------------------------|-----------|-----------------------------------------------------------------------------------------------------------------------------------------------------|-----------------------------------------------------------------------------------------------------------------------------------------------------|-----------------------------------------------------------------------------------------------------------------------------------------------------------------------------------------------------------------------------------------------------------------------------------------------------------------------------------------------------------------------------------------------------------------------------------|
| EPI_ISL_825108, EPI_ISL_825109, EPI_ISL_825110, EPI_ISL_825111, EPI_ISL_825112, EPI_ISL_825113, EPI_ISL_825114, EPI_ISL_825115, EPI_ISL_825116, EPI_ISL_825117, EPI_ISL_825118, EPI_ISL_825119, EPI_ISL_825120, EPI_ISL_825121, EPI_ISL_825122, EPI_ISL_825123, EPI_ISL_825124, EPI_ISL_825125, EPI_ISL_825126, EPI_ISL_825127, EPI_ISL_825128, EPI_ISL_825129, EPI_ISL_825130, EPI_ISL_825131, EPI_ISL_825132, EPI_ISL_825133, EPI_ISL_825134, EPI_ISL_825135, EPI_ISL_825136, EPI_ISL_825137, EPI_ISL_825138, EPI_ISL_825139                                                                                                                                                                                                                                                                                                                                                                                                                                                                                                                                                                                                                                                                                                                                                                                                                                                                 | see above | NHLS-IALCH                                                                                                                                          | KRISP, KZN Research Innovation and Sequencing Platform                                                                                              | Giandhari J, Pillay S, Lessells R, Mdlalose K, York D, Khan S, Tegally H, Wilkinson E, de Oliveira T                                                                                                                                                                                                                                                                                                                              |
| EPI_ISL_825385                                                                                                                                                                                                                                                                                                                                                                                                                                                                                                                                                                                                                                                                                                                                                                                                                                                                                                                                                                                                                                                                                                                                                                                                                                                                                                                                                                                 |           | Nigeria Centre For Disease Control                                                                                                                  | National reference Laboratory, NCDC, Gaduwa, Abuja                                                                                                  | Dr Ndodo Nnaemeka, Olusola Anuoluwapo Akanbi, Chimaobi Chukwu, Dr Omoare Adesuyi, Kingsley Madubuike, Anthony Ahumibe, Naidoo Dhamari, Nwando Mba, Dr Chikwe Ihekweazu                                                                                                                                                                                                                                                            |
| EPI_ISL_825437                                                                                                                                                                                                                                                                                                                                                                                                                                                                                                                                                                                                                                                                                                                                                                                                                                                                                                                                                                                                                                                                                                                                                                                                                                                                                                                                                                                 |           | Nigeria Centre For Disease Control                                                                                                                  | National reference Laboratory, NCDC, Gaduwa, Abuja                                                                                                  | Dr Ndodo Nnaemeka, Olusola Anuoluwapo Akanbi, Chimaobi Chukwu, Dr Omoare Adesuyi, Esebanmen Grace, Kingsley Njoku, Anthony Ahumibe, Naidoo Dhamari, Nwando Mba, Dr Chikwe Ihekweazu                                                                                                                                                                                                                                               |
| EPI_ISL_825438, EPI_ISL_825439, EPI_ISL_825440, EPI_ISL_825441, EPI_ISL_825442, EPI_ISL_825443, EPI_ISL_825444, EPI_ISL_825445, EPI_ISL_825446, EPI_ISL_825447, EPI_ISL_825448, EPI_ISL_825449, EPI_ISL_825450, EPI_ISL_825451, EPI_ISL_825452, EPI_ISL_825453, EPI_ISL_825454, EPI_ISL_825455, EPI_ISL_825456, EPI_ISL_825457, EPI_ISL_825458, EPI_ISL_825459, EPI_ISL_825460, EPI_ISL_825461, EPI_ISL_825462, EPI_ISL_825463, EPI_ISL_825464, EPI_ISL_825465, EPI_ISL_825466, EPI_ISL_825467, EPI_ISL_825468, EPI_ISL_825469, EPI_ISL_825470, EPI_ISL_825471, EPI_ISL_825472, EPI_ISL_825473, EPI_ISL_825474, EPI_ISL_825475, EPI_ISL_825476, EPI_ISL_825477, EPI_ISL_825478, EPI_ISL_825479, EPI_ISL_825480, EPI_ISL_825481, EPI_ISL_825482, EPI_ISL_825483, EPI_ISL_825484, EPI_ISL_825485, EPI_ISL_825486, EPI_ISL_825487, EPI_ISL_825488, EPI_ISL_825489                                                                                                                                                                                                                                                                                                                                                                                                                                                                                                                                 | see above | NHLS-IALCH                                                                                                                                          | KRISP, KZN Research Innovation and Sequencing Platform                                                                                              | Giandhari J, Pillay S, Lessells R, Mdlalose K, York D, Khan S, Tegally H, Wilkinson E, de Oliveira T                                                                                                                                                                                                                                                                                                                              |
| EPI_ISL_825617, EPI_ISL_825632, EPI_ISL_825633, EPI_ISL_825713, EPI_ISL_825714, EPI_ISL_825807                                                                                                                                                                                                                                                                                                                                                                                                                                                                                                                                                                                                                                                                                                                                                                                                                                                                                                                                                                                                                                                                                                                                                                                                                                                                                                 |           | Nigeria Centre For Disease Control                                                                                                                  | National reference Laboratory, NCDC, Gaduwa, Abuja                                                                                                  | Dr Ndodo Nnaemeka, Olusola Anuoluwapo Akanbi, Chimaobi Chukwu, Dr Omoare Adesuyi, Esebanmen Grace, Anthony Ahumibe, Naidoo Dhamari, Nwando Mba, Dr Chikwe Ihekweazu                                                                                                                                                                                                                                                               |
| EPI_ISL_845546, EPI_ISL_845547, EPI_ISL_845548, EPI_ISL_845549, EPI_ISL_845550, EPI_ISL_845551, EPI_ISL_845552, EPI_ISL_845553, EPI_ISL_845554, EPI_ISL_845555, EPI_ISL_845556, EPI_ISL_845557, EPI_ISL_845558, EPI_ISL_845559, EPI_ISL_845560, EPI_ISL_845561, EPI_ISL_845562, EPI_ISL_845563, EPI_ISL_845564, EPI_ISL_845565                                                                                                                                                                                                                                                                                                                                                                                                                                                                                                                                                                                                                                                                                                                                                                                                                                                                                                                                                                                                                                                                 | see above | National Public Health Laboratory, Cameroon                                                                                                         | African Centre of Excellence for Genomics of Infectious Diseases (ACEGID), Redeemer's University                                                    | Oluniyi P.E. et al                                                                                                                                                                                                                                                                                                                                                                                                                |
| EPI_ISL_855494, EPI_ISL_855495, EPI_ISL_855496, EPI_ISL_855497, EPI_ISL_855498, EPI_ISL_855499, EPI_ISL_855500, EPI_ISL_855501, EPI_ISL_855502, EPI_ISL_855503, EPI_ISL_855504, EPI_ISL_855505, EPI_ISL_855506, EPI_ISL_855507, EPI_ISL_855508, EPI_ISL_855509, EPI_ISL_855510, EPI_ISL_855511, EPI_ISL_855512, EPI_ISL_855513, EPI_ISL_855514, EPI_ISL_855515, EPI_ISL_855516, EPI_ISL_855517, EPI_ISL_855518, EPI_ISL_855519, EPI_ISL_855520, EPI_ISL_855521, EPI_ISL_855522, EPI_ISL_855523, EPI_ISL_855524, EPI_ISL_855525, EPI_ISL_855526, EPI_ISL_855527, EPI_ISL_855528, EPI_ISL_855529, EPI_ISL_855530, EPI_ISL_855531, EPI_ISL_855532, EPI_ISL_855533, EPI_ISL_855534, EPI_ISL_855535, EPI_ISL_855536, EPI_ISL_855537, EPI_ISL_855538, EPI_ISL_855539, EPI_ISL_855540, EPI_ISL_855541, EPI_ISL_855542, EPI_ISL_855543, EPI_ISL_855544, EPI_ISL_855545, EPI_ISL_855546, EPI_ISL_855547, EPI_ISL_855548, EPI_ISL_855549, EPI_ISL_855550, EPI_ISL_855551, EPI_ISL_855552, EPI_ISL_855553, EPI_ISL_855554, EPI_ISL_855555, EPI_ISL_855556, EPI_ISL_855557, EPI_ISL_855558, EPI_ISL_855559, EPI_ISL_855560, EPI_ISL_855561, EPI_ISL_855562, EPI_ISL_855563, EPI_ISL_855564, EPI_ISL_855565, EPI_ISL_855566, EPI_ISL_855567, EPI_ISL_855568, EPI_ISL_855569, EPI_ISL_855570, EPI_ISL_855571, EPI_ISL_855572                                                                                 | see above | KEMRI-Wellcome Trust Research Programme/KEMRI-CGMR-C Kilifi                                                                                         | KEMRI-Wellcome Trust Research Programme/KEMRI-CGMR-C Kilifi                                                                                         | Githinji et al                                                                                                                                                                                                                                                                                                                                                                                                                    |
| EPI_ISL_855557, EPI_ISL_855558, EPI_ISL_855559, EPI_ISL_855560, EPI_ISL_855561, EPI_ISL_855562, EPI_ISL_855563, EPI_ISL_855564, EPI_ISL_855565, EPI_ISL_855566, EPI_ISL_855567, EPI_ISL_855568, EPI_ISL_855569, EPI_ISL_855570, EPI_ISL_855571, EPI_ISL_855572                                                                                                                                                                                                                                                                                                                                                                                                                                                                                                                                                                                                                                                                                                                                                                                                                                                                                                                                                                                                                                                                                                                                 | see above | Department of Virology, Principal Military Hospital of Instruction of Tunis                                                                         | Bundeswehr Institute of Microbiology                                                                                                                | Susann Handrick, Malena Bestehorn-Willmann, Simone Eckstein, Mathias C. Walter, Markus H. Antwerpen, Habiba Najja, Kilian Stoecker, Roman Wölfel & Mohamed Ben Moussa                                                                                                                                                                                                                                                             |
| EPI_ISL_856695                                                                                                                                                                                                                                                                                                                                                                                                                                                                                                                                                                                                                                                                                                                                                                                                                                                                                                                                                                                                                                                                                                                                                                                                                                                                                                                                                                                 |           | University of Zambia, School of Veterinary Medicine, Disease Control                                                                                | University of Zambia, School of Veterinary Medicine, Disease Control                                                                                | Simulundu,E., Kapata,N., Mupeta,F., Kapata,P.C., Saasa,N., Changula,K., Muleya,W., Chitanga,S., Chambaro,H., Mubemba,B., Masahiro,K., Chanda,D., Mulenga,L., Fwoloshi,S., Shimbema,A.L., Kapaya,F., Zulu,P., Musonda,K., Monze,M., Sinyange,N., Liwewe,M.M., Kapin'a,M., Chipimo,P.J., Ngosa,W., Morales,A.N., Kayeyi,N., Malama,K., Tembo,J., Bates,M., Sawa,H., Takada,A., Nalubamba,K.S., Mukonka,V., Chilufya,C. and Zumla,A. |
| EPI_ISL_857315, EPI_ISL_857316, EPI_ISL_857317, EPI_ISL_857318, EPI_ISL_857319, EPI_ISL_857320, EPI_ISL_857321, EPI_ISL_857322, EPI_ISL_857323, EPI_ISL_857324, EPI_ISL_857325, EPI_ISL_857326, EPI_ISL_857327, EPI_ISL_857328, EPI_ISL_857329, EPI_ISL_857330, EPI_ISL_857331, EPI_ISL_857332, EPI_ISL_857333, EPI_ISL_857334, EPI_ISL_857335, EPI_ISL_857336, EPI_ISL_857337, EPI_ISL_857338, EPI_ISL_857339, EPI_ISL_857340, EPI_ISL_857341, EPI_ISL_857342, EPI_ISL_857343, EPI_ISL_857344, EPI_ISL_857345, EPI_ISL_857346, EPI_ISL_857347                                                                                                                                                                                                                                                                                                                                                                                                                                                                                                                                                                                                                                                                                                                                                                                                                                                 | see above | Cancer Biology Department, National Cancer Institute                                                                                                | Cancer Biology Department, National Cancer Institute                                                                                                | Zekri,A.N., Sedawy,M.G., Ahmed,O.S., Hafez,M.M., Soliman,H.K., Bahnassy,A.A., Elhosiény,F.W., Gad,A.E., Hamdy,M.S., Soliman,M.S., Soliman,L., Abouelhoda,M.                                                                                                                                                                                                                                                                       |
| EPI_ISL_860559, EPI_ISL_860560, EPI_ISL_860561, EPI_ISL_860562, EPI_ISL_860563, EPI_ISL_860564, EPI_ISL_860565, EPI_ISL_860566, EPI_ISL_860567, EPI_ISL_860568, EPI_ISL_860569, EPI_ISL_860570, EPI_ISL_860571, EPI_ISL_860572, EPI_ISL_860573, EPI_ISL_860574, EPI_ISL_860575, EPI_ISL_860576, EPI_ISL_860577, EPI_ISL_860578, EPI_ISL_860579, EPI_ISL_860580, EPI_ISL_860581, EPI_ISL_860582, EPI_ISL_860583, EPI_ISL_860584, EPI_ISL_860585, EPI_ISL_860586, EPI_ISL_860587, EPI_ISL_860588, EPI_ISL_860589, EPI_ISL_860590, EPI_ISL_860591, EPI_ISL_860592, EPI_ISL_860593, EPI_ISL_860594, EPI_ISL_860595, EPI_ISL_860596, EPI_ISL_860597, EPI_ISL_860598, EPI_ISL_860599, EPI_ISL_860600, EPI_ISL_860601, EPI_ISL_860602, EPI_ISL_860603, EPI_ISL_860604, EPI_ISL_860605, EPI_ISL_860606, EPI_ISL_860607, EPI_ISL_860608, EPI_ISL_860609, EPI_ISL_860610, EPI_ISL_860611, EPI_ISL_860612, EPI_ISL_860613, EPI_ISL_860614, EPI_ISL_860615, EPI_ISL_860616, EPI_ISL_860617, EPI_ISL_860618, EPI_ISL_860619, EPI_ISL_860620, EPI_ISL_860621, EPI_ISL_860622, EPI_ISL_860623, EPI_ISL_860624, EPI_ISL_860625, EPI_ISL_860626, EPI_ISL_860627, EPI_ISL_860628, EPI_ISL_860629, EPI_ISL_860630                                                                                                                                                                                                 | see above | NHLS-IALCH                                                                                                                                          | KRISP, KZN Research Innovation and Sequencing Platform                                                                                              | Giandhari J, Pillay S, Lessells R, Mdlalose K, York D, Khan S, Tegally H, Wilkinson E, de Oliveira T                                                                                                                                                                                                                                                                                                                              |
| EPI_ISL_860631, EPI_ISL_860632                                                                                                                                                                                                                                                                                                                                                                                                                                                                                                                                                                                                                                                                                                                                                                                                                                                                                                                                                                                                                                                                                                                                                                                                                                                                                                                                                                 |           | Ampath-Netcare                                                                                                                                      | KRISP, KZN Research Innovation and Sequencing Platform                                                                                              | Giandhari J, Pillay S, Lessells R, Mdlalose K, York D, Khan S, Tegally H, Wilkinson E, de Oliveira T                                                                                                                                                                                                                                                                                                                              |
| EPI_ISL_861459, EPI_ISL_861460, EPI_ISL_861461, EPI_ISL_861462, EPI_ISL_861463, EPI_ISL_861464, EPI_ISL_861465, EPI_ISL_861466, EPI_ISL_861467, EPI_ISL_861468, EPI_ISL_861469, EPI_ISL_861470, EPI_ISL_861471                                                                                                                                                                                                                                                                                                                                                                                                                                                                                                                                                                                                                                                                                                                                                                                                                                                                                                                                                                                                                                                                                                                                                                                 | see above | UHAS COVID-19 Lab                                                                                                                                   | UHAS COVID-19 Lab                                                                                                                                   | Kwabena O. Duedu, Jones Gyamfi, Reuben Ayivor-Djanie, John O. Gyapong and the UHAS COVID-19 Lab Team                                                                                                                                                                                                                                                                                                                              |
| EPI_ISL_862783, EPI_ISL_862784, EPI_ISL_862785                                                                                                                                                                                                                                                                                                                                                                                                                                                                                                                                                                                                                                                                                                                                                                                                                                                                                                                                                                                                                                                                                                                                                                                                                                                                                                                                                 |           | Cancer Biology Department, National Cancer Institute                                                                                                | Cancer Biology Department, National Cancer Institute                                                                                                | Zekri,A.N., Sedawy,M.G., Ahmed,O.S., Hafez,M.M., Soliman,H.K., Bahnassy,A.A., Elhosiény,F.W., Gad,A.E., Hamdy,M.S., Soliman,M.S., Soliman,L., Abouelhoda,M.                                                                                                                                                                                                                                                                       |
| EPI_ISL_872601, EPI_ISL_872602, EPI_ISL_872603, EPI_ISL_872604, EPI_ISL_872605, EPI_ISL_872606, EPI_ISL_872607, EPI_ISL_872608, EPI_ISL_872609, EPI_ISL_872610, EPI_ISL_872611, EPI_ISL_872612, EPI_ISL_872613, EPI_ISL_872614, EPI_ISL_872615, EPI_ISL_872616, EPI_ISL_872617, EPI_ISL_872618, EPI_ISL_872619, EPI_ISL_872620, EPI_ISL_872621, EPI_ISL_872622, EPI_ISL_872623, EPI_ISL_872624, EPI_ISL_872625, EPI_ISL_872626, EPI_ISL_872627                                                                                                                                                                                                                                                                                                                                                                                                                                                                                                                                                                                                                                                                                                                                                                                                                                                                                                                                                 | see above | Nigeria Centre for Disease Control (NCDC)                                                                                                           | African Centre of Excellence for Genomics of Infectious Diseases (ACEGID), Redeemer's University                                                    | Oluniyi P.E. et al                                                                                                                                                                                                                                                                                                                                                                                                                |
| EPI_ISL_884826, EPI_ISL_884827, EPI_ISL_884828, EPI_ISL_884829, EPI_ISL_884830, EPI_ISL_884831, EPI_ISL_884832, EPI_ISL_884833, EPI_ISL_884834, EPI_ISL_884835, EPI_ISL_884836, EPI_ISL_884837, EPI_ISL_884838, EPI_ISL_884839, EPI_ISL_884840, EPI_ISL_884841, EPI_ISL_884842, EPI_ISL_884843, EPI_ISL_884844, EPI_ISL_884845, EPI_ISL_884846, EPI_ISL_884847, EPI_ISL_884848, EPI_ISL_884849, EPI_ISL_884850, EPI_ISL_884851, EPI_ISL_884852, EPI_ISL_884853, EPI_ISL_884854, EPI_ISL_884855, EPI_ISL_884856                                                                                                                                                                                                                                                                                                                                                                                                                                                                                                                                                                                                                                                                                                                                                                                                                                                                                 | see above | Department of Biochemistry, Cell and Molecular Biology, West African Centre for Cell Biology of Infectious Pathogens (WACCBIP), University of Ghana | Department of Biochemistry, Cell and Molecular Biology, West African Centre for Cell Biology of Infectious Pathogens (WACCBIP), University of Ghana | Ngoi,J.M., Tei-Maya,F., Morang'a,C.M., Magnusen,V., Amuzu,D.S., Mohammed,A., Tapela,K., Kibinge,N., Diallo,A.B., Kumi-Ansah,F., Odoom,T., Boakye,O.D., Amoako,E., Abass,A.-K., Quashie,P., Amenga-Etego,L.N., Akorirya,S.K., Awandare,G.A., Bediako,Y.                                                                                                                                                                            |
| EPI_ISL_887420, EPI_ISL_887421, EPI_ISL_887422, EPI_ISL_887423, EPI_ISL_887424, EPI_ISL_887425, EPI_ISL_887426, EPI_ISL_887427, EPI_ISL_887428, EPI_ISL_887429, EPI_ISL_887430, EPI_ISL_887431, EPI_ISL_887432, EPI_ISL_887433, EPI_ISL_887434, EPI_ISL_887435, EPI_ISL_887436, EPI_ISL_887437, EPI_ISL_887438, EPI_ISL_887439, EPI_ISL_887440, EPI_ISL_887441, EPI_ISL_887442, EPI_ISL_887443, EPI_ISL_887444, EPI_ISL_887445, EPI_ISL_887446, EPI_ISL_887447, EPI_ISL_887448, EPI_ISL_887449, EPI_ISL_887450, EPI_ISL_887451, EPI_ISL_887452, EPI_ISL_887453, EPI_ISL_887454, EPI_ISL_887455, EPI_ISL_887456, EPI_ISL_887457, EPI_ISL_887458, EPI_ISL_887459, EPI_ISL_887460, EPI_ISL_887461, EPI_ISL_887462, EPI_ISL_887463, EPI_ISL_887464, EPI_ISL_887465, EPI_ISL_887466, EPI_ISL_887467, EPI_ISL_887468, EPI_ISL_887469, EPI_ISL_887470, EPI_ISL_887471, EPI_ISL_887472, EPI_ISL_887473, EPI_ISL_887474, EPI_ISL_887475, EPI_ISL_887476, EPI_ISL_887477, EPI_ISL_887478, EPI_ISL_887479, EPI_ISL_887480, EPI_ISL_887481, EPI_ISL_887482, EPI_ISL_887483, EPI_ISL_887484, EPI_ISL_887485, EPI_ISL_887486, EPI_ISL_887487, EPI_ISL_887488, EPI_ISL_887489, EPI_ISL_887490, EPI_ISL_887491, EPI_ISL_887492, EPI_ISL_887493, EPI_ISL_887494, EPI_ISL_887495, EPI_ISL_887496, EPI_ISL_887497, EPI_ISL_887498, EPI_ISL_887499, EPI_ISL_887500, EPI_ISL_887501, EPI_ISL_887502, EPI_ISL_887503 | see above | Instituto Nacional de Saude (INS), Mozambique                                                                                                       | KRISP, KZN Research Innovation and Sequencing Platform                                                                                              | Nalia Ismael, Nadia Siteo, Paulo Arnaldo, Nedio Mabunda, Giandhari J, Pillay S, Tegally H, Wilkinson E, de Oliveira T                                                                                                                                                                                                                                                                                                             |
| EPI_ISL_906275, EPI_ISL_906276, EPI_ISL_906285, EPI_ISL_906287, EPI_ISL_906288, EPI_ISL_906289, EPI_ISL_906290, EPI_ISL_906291, EPI_ISL_906292, EPI_ISL_906293, EPI_ISL_906294, EPI_ISL_906295, EPI_ISL_906296, EPI_ISL_906297, EPI_ISL_906298, EPI_ISL_906299, EPI_ISL_906300, EPI_ISL_906301, EPI_ISL_906302, EPI_ISL_906303, EPI_ISL_906304, EPI_ISL_906305                                                                                                                                                                                                                                                                                                                                                                                                                                                                                                                                                                                                                                                                                                                                                                                                                                                                                                                                                                                                                                 | see above | Nigeria Centre for Disease Control (NCDC)                                                                                                           | African Centre of Excellence for Genomics of Infectious Diseases (ACEGID), Redeemer's University                                                    | Oluniyi P.E. et al                                                                                                                                                                                                                                                                                                                                                                                                                |
| EPI_ISL_907076                                                                                                                                                                                                                                                                                                                                                                                                                                                                                                                                                                                                                                                                                                                                                                                                                                                                                                                                                                                                                                                                                                                                                                                                                                                                                                                                                                                 |           | Biology, MCL                                                                                                                                        | Biology, MCL                                                                                                                                        | Seadawy,M.G., Zekri,A.N., Shamel,M.D., Gad,A.F., Elhoseiny,M.F.                                                                                                                                                                                                                                                                                                                                                                   |
| EPI_ISL_907077, EPI_ISL_907078, EPI_ISL_907079, EPI_ISL_907080, EPI_ISL_907081, EPI_ISL_907082, EPI_ISL_907083, EPI_ISL_907084, EPI_ISL_907085                                                                                                                                                                                                                                                                                                                                                                                                                                                                                                                                                                                                                                                                                                                                                                                                                                                                                                                                                                                                                                                                                                                                                                                                                                                 |           | Biology, MCL                                                                                                                                        | Biology, MCL                                                                                                                                        | Seadawy,M.G., Shamel,M.D., Gad,A.F., Elhoseiny,M.F., Zekri,A.N.                                                                                                                                                                                                                                                                                                                                                                   |
| EPI_ISL_907086, EPI_ISL_907087, EPI_ISL_907088, EPI_ISL_907089, EPI_ISL_907090, EPI_ISL_907091, EPI_ISL_907092, EPI_ISL_907094, EPI_ISL_907095, EPI_ISL_907096, EPI_ISL_907097, EPI_ISL_907098, EPI_ISL_907099, EPI_ISL_907100                                                                                                                                                                                                                                                                                                                                                                                                                                                                                                                                                                                                                                                                                                                                                                                                                                                                                                                                                                                                                                                                                                                                                                 | see above | Cancer Biology Department, National Cancer Institute                                                                                                | Cancer Biology Department, National Cancer Institute                                                                                                | Zekri,A.N., Sedawy,M.G., Ahmed,O.S., Hafez,M.M., Soliman,H.K., Bahnassy,A.A., Elhosiény,F.W., Gad,A.E., Hamdy,M.S., Soliman,M.S., Soliman,L., Abouelhoda,M.                                                                                                                                                                                                                                                                       |
| EPI_ISL_912353, EPI_ISL_912354, EPI_ISL_912355, EPI_ISL_912356, EPI_ISL_912357, EPI_ISL_912358, EPI_ISL_912359, EPI_ISL_912360, EPI_ISL_912361, EPI_ISL_912362, EPI_ISL_912363, EPI_ISL_912364, EPI_ISL_912365, EPI_ISL_912366, EPI_ISL_912367, EPI_ISL_912368, EPI_ISL_912369, EPI_ISL_912370, EPI_ISL_912371, EPI_ISL_912372, EPI_ISL_912373, EPI_ISL_912374, EPI_ISL_912381, EPI_ISL_912382, EPI_ISL_912383, EPI_ISL_912384, EPI_ISL_912385, EPI_ISL_912391, EPI_ISL_912392, EPI_ISL_912393, EPI_ISL_912394                                                                                                                                                                                                                                                                                                                                                                                                                                                                                                                                                                                                                                                                                                                                                                                                                                                                                 |           |                                                                                                                                                     |                                                                                                                                                     |                                                                                                                                                                                                                                                                                                                                                                                                                                   |

|                                                                                                                                                                                                                                                                                                                                                                                                                                                                                                                                                                                                                                                                                                                                                                                                                                                                                                                                                                                                                                                                                                                                                                                                                                                                                                                                                                                                                                                                                                                                                                                                                                                                                                                                                                                                                                                                                                                                                                                                                                                                                                                                                                                                                                                                                                                                                                                                                                                                                                                                                                                                                                                                                                                                                                                                                                                                                                                                                                                                                                                                                                                                                                                                                                                                                                                                                                                                                                                                                                                                                                                                                                                                                                                                                                                                                                                                                                                                                                                                                                                                                                                                                                                                                                                                                                                                                                                                                                                                                                                                                                                                                                                                                                                                                                                                                                                                                                                                                                                                                                                                                                                                                                                                                                                                                                                                                                                                                                                                                                                                                                                                                                                                                                                                                                                                                                                                                                                                                                             |                                                                                                             |                                                                                                                      |                                                                                                                                                                                                                                                                 |
|-----------------------------------------------------------------------------------------------------------------------------------------------------------------------------------------------------------------------------------------------------------------------------------------------------------------------------------------------------------------------------------------------------------------------------------------------------------------------------------------------------------------------------------------------------------------------------------------------------------------------------------------------------------------------------------------------------------------------------------------------------------------------------------------------------------------------------------------------------------------------------------------------------------------------------------------------------------------------------------------------------------------------------------------------------------------------------------------------------------------------------------------------------------------------------------------------------------------------------------------------------------------------------------------------------------------------------------------------------------------------------------------------------------------------------------------------------------------------------------------------------------------------------------------------------------------------------------------------------------------------------------------------------------------------------------------------------------------------------------------------------------------------------------------------------------------------------------------------------------------------------------------------------------------------------------------------------------------------------------------------------------------------------------------------------------------------------------------------------------------------------------------------------------------------------------------------------------------------------------------------------------------------------------------------------------------------------------------------------------------------------------------------------------------------------------------------------------------------------------------------------------------------------------------------------------------------------------------------------------------------------------------------------------------------------------------------------------------------------------------------------------------------------------------------------------------------------------------------------------------------------------------------------------------------------------------------------------------------------------------------------------------------------------------------------------------------------------------------------------------------------------------------------------------------------------------------------------------------------------------------------------------------------------------------------------------------------------------------------------------------------------------------------------------------------------------------------------------------------------------------------------------------------------------------------------------------------------------------------------------------------------------------------------------------------------------------------------------------------------------------------------------------------------------------------------------------------------------------------------------------------------------------------------------------------------------------------------------------------------------------------------------------------------------------------------------------------------------------------------------------------------------------------------------------------------------------------------------------------------------------------------------------------------------------------------------------------------------------------------------------------------------------------------------------------------------------------------------------------------------------------------------------------------------------------------------------------------------------------------------------------------------------------------------------------------------------------------------------------------------------------------------------------------------------------------------------------------------------------------------------------------------------------------------------------------------------------------------------------------------------------------------------------------------------------------------------------------------------------------------------------------------------------------------------------------------------------------------------------------------------------------------------------------------------------------------------------------------------------------------------------------------------------------------------------------------------------------------------------------------------------------------------------------------------------------------------------------------------------------------------------------------------------------------------------------------------------------------------------------------------------------------------------------------------------------------------------------------------------------------------------------------------------------------------------------------------------------------------------|-------------------------------------------------------------------------------------------------------------|----------------------------------------------------------------------------------------------------------------------|-----------------------------------------------------------------------------------------------------------------------------------------------------------------------------------------------------------------------------------------------------------------|
| see above                                                                                                                                                                                                                                                                                                                                                                                                                                                                                                                                                                                                                                                                                                                                                                                                                                                                                                                                                                                                                                                                                                                                                                                                                                                                                                                                                                                                                                                                                                                                                                                                                                                                                                                                                                                                                                                                                                                                                                                                                                                                                                                                                                                                                                                                                                                                                                                                                                                                                                                                                                                                                                                                                                                                                                                                                                                                                                                                                                                                                                                                                                                                                                                                                                                                                                                                                                                                                                                                                                                                                                                                                                                                                                                                                                                                                                                                                                                                                                                                                                                                                                                                                                                                                                                                                                                                                                                                                                                                                                                                                                                                                                                                                                                                                                                                                                                                                                                                                                                                                                                                                                                                                                                                                                                                                                                                                                                                                                                                                                                                                                                                                                                                                                                                                                                                                                                                                                                                                                   | Fondation Congolaise pour la recherche medicale (FCRM), Francine Ntoumi                                     | NGS Competence Center Tuebingen, Institut für Medizinische Mikrobiologie und Hygiene, Universitaetsklinikum Tübingen | Angel Angelov                                                                                                                                                                                                                                                   |
| EPI_ISL_912456, EPI_ISL_912457, EPI_ISL_912458, EPI_ISL_912459, EPI_ISL_912460, EPI_ISL_912461, EPI_ISL_912462, EPI_ISL_912463, EPI_ISL_912464, EPI_ISL_912465, EPI_ISL_912466, EPI_ISL_912467, EPI_ISL_912468, EPI_ISL_912469, EPI_ISL_912470, EPI_ISL_912471, EPI_ISL_912472, EPI_ISL_912473, EPI_ISL_912474, EPI_ISL_912475, EPI_ISL_912476, EPI_ISL_912477, EPI_ISL_912478, EPI_ISL_912479, EPI_ISL_912480, EPI_ISL_912481, EPI_ISL_912482, EPI_ISL_912483, EPI_ISL_912485, EPI_ISL_912486, EPI_ISL_912487, EPI_ISL_912488, EPI_ISL_912489, EPI_ISL_912490, EPI_ISL_912491, EPI_ISL_912492, EPI_ISL_912493, EPI_ISL_912494, EPI_ISL_912495, EPI_ISL_912496, EPI_ISL_912497, EPI_ISL_912498, EPI_ISL_912499, EPI_ISL_912500, EPI_ISL_912501, EPI_ISL_912502, EPI_ISL_912503, EPI_ISL_912504, EPI_ISL_912505, EPI_ISL_912506, EPI_ISL_912507, EPI_ISL_912508, EPI_ISL_912509, EPI_ISL_912510, EPI_ISL_912511, EPI_ISL_912512, EPI_ISL_912513, EPI_ISL_912514, EPI_ISL_912515, EPI_ISL_912516, EPI_ISL_912517, EPI_ISL_912518, EPI_ISL_912519, EPI_ISL_912520, EPI_ISL_912521, EPI_ISL_912522, EPI_ISL_912523, EPI_ISL_912524, EPI_ISL_912525, EPI_ISL_912526, EPI_ISL_912527, EPI_ISL_912528, EPI_ISL_912529, EPI_ISL_912530, EPI_ISL_912531, EPI_ISL_912532, EPI_ISL_912533, EPI_ISL_912534, EPI_ISL_912535, EPI_ISL_912536, EPI_ISL_912537, EPI_ISL_912538                                                                                                                                                                                                                                                                                                                                                                                                                                                                                                                                                                                                                                                                                                                                                                                                                                                                                                                                                                                                                                                                                                                                                                                                                                                                                                                                                                                                                                                                                                                                                                                                                                                                                                                                                                                                                                                                                                                                                                                                                                                                                                                                                                                                                                                                                                                                                                                                                                                                                                                                                                                                                                                                                                                                                                                                                                                                                                                                                                                                                                                                                                                                                                                                                                                                                                                                                                                                                                                                                                                                                                                                                                                                                                                                                                                                                                                                                                                                                                                                                                                                                                                                                                                                                                                                                                                                                                                                                                                                                                                                                                                                              |                                                                                                             |                                                                                                                      |                                                                                                                                                                                                                                                                 |
| see above                                                                                                                                                                                                                                                                                                                                                                                                                                                                                                                                                                                                                                                                                                                                                                                                                                                                                                                                                                                                                                                                                                                                                                                                                                                                                                                                                                                                                                                                                                                                                                                                                                                                                                                                                                                                                                                                                                                                                                                                                                                                                                                                                                                                                                                                                                                                                                                                                                                                                                                                                                                                                                                                                                                                                                                                                                                                                                                                                                                                                                                                                                                                                                                                                                                                                                                                                                                                                                                                                                                                                                                                                                                                                                                                                                                                                                                                                                                                                                                                                                                                                                                                                                                                                                                                                                                                                                                                                                                                                                                                                                                                                                                                                                                                                                                                                                                                                                                                                                                                                                                                                                                                                                                                                                                                                                                                                                                                                                                                                                                                                                                                                                                                                                                                                                                                                                                                                                                                                                   | NHLS Universitas Academic                                                                                   | UFS Virology                                                                                                         | PA Bester, MM Nyaga, P Nthiga, MT Mogotsi, D Goedhals, T de Oliveira                                                                                                                                                                                            |
| EPI_ISL_925847, EPI_ISL_925848, EPI_ISL_925849, EPI_ISL_925850, EPI_ISL_925851, EPI_ISL_925852, EPI_ISL_925853, EPI_ISL_925854, EPI_ISL_925855, EPI_ISL_925856, EPI_ISL_925857, EPI_ISL_925858, EPI_ISL_925859, EPI_ISL_925860, EPI_ISL_925861, EPI_ISL_925862, EPI_ISL_925863, EPI_ISL_925864, EPI_ISL_925865, EPI_ISL_925866, EPI_ISL_925867, EPI_ISL_925868, EPI_ISL_925869, EPI_ISL_925870, EPI_ISL_925871, EPI_ISL_925872, EPI_ISL_925873, EPI_ISL_925874, EPI_ISL_925875, EPI_ISL_925876, EPI_ISL_925877, EPI_ISL_925878, EPI_ISL_925879, EPI_ISL_925880, EPI_ISL_925881, EPI_ISL_925882, EPI_ISL_925883, EPI_ISL_925884, EPI_ISL_925885, EPI_ISL_925886, EPI_ISL_925887, EPI_ISL_925888, EPI_ISL_925889, EPI_ISL_925890, EPI_ISL_925891, EPI_ISL_925892, EPI_ISL_925893, EPI_ISL_925894, EPI_ISL_925895, EPI_ISL_925896, EPI_ISL_925897, EPI_ISL_925898, EPI_ISL_925899, EPI_ISL_925900, EPI_ISL_925901, EPI_ISL_925902, EPI_ISL_925903, EPI_ISL_925904, EPI_ISL_925905, EPI_ISL_925906, EPI_ISL_925907, EPI_ISL_925908, EPI_ISL_925909, EPI_ISL_925910, EPI_ISL_925911, EPI_ISL_925912, EPI_ISL_925913, EPI_ISL_925914, EPI_ISL_925915, EPI_ISL_925916, EPI_ISL_925917, EPI_ISL_925918, EPI_ISL_925919, EPI_ISL_925920, EPI_ISL_925921, EPI_ISL_925922, EPI_ISL_925923, EPI_ISL_925924, EPI_ISL_925925, EPI_ISL_925926, EPI_ISL_925927, EPI_ISL_925928, EPI_ISL_925929, EPI_ISL_925930, EPI_ISL_925931, EPI_ISL_925932, EPI_ISL_925933, EPI_ISL_925934, EPI_ISL_925935, EPI_ISL_925936, EPI_ISL_925937, EPI_ISL_925938, EPI_ISL_925939, EPI_ISL_925940, EPI_ISL_925941, EPI_ISL_925942, EPI_ISL_925943, EPI_ISL_925944, EPI_ISL_925945, EPI_ISL_925946, EPI_ISL_925947, EPI_ISL_925948, EPI_ISL_925949, EPI_ISL_925950, EPI_ISL_925951, EPI_ISL_925952, EPI_ISL_925953, EPI_ISL_925954, EPI_ISL_925955, EPI_ISL_925956, EPI_ISL_925957, EPI_ISL_925958, EPI_ISL_925959, EPI_ISL_925960, EPI_ISL_925961, EPI_ISL_925962, EPI_ISL_925963, EPI_ISL_925964, EPI_ISL_925965, EPI_ISL_925966, EPI_ISL_925967, EPI_ISL_925968, EPI_ISL_925969, EPI_ISL_925970, EPI_ISL_925971, EPI_ISL_925972, EPI_ISL_925973, EPI_ISL_925974, EPI_ISL_925975, EPI_ISL_925976, EPI_ISL_925977, EPI_ISL_925978, EPI_ISL_925979, EPI_ISL_925980, EPI_ISL_925981, EPI_ISL_925982, EPI_ISL_925983, EPI_ISL_925984, EPI_ISL_925985, EPI_ISL_925986, EPI_ISL_925987, EPI_ISL_925988, EPI_ISL_925989, EPI_ISL_925990, EPI_ISL_925991, EPI_ISL_925992, EPI_ISL_925993, EPI_ISL_925994, EPI_ISL_925995, EPI_ISL_925996, EPI_ISL_925997, EPI_ISL_925998, EPI_ISL_925999, EPI_ISL_926000, EPI_ISL_926001, EPI_ISL_926002, EPI_ISL_926003, EPI_ISL_926004, EPI_ISL_926005, EPI_ISL_926006, EPI_ISL_926007, EPI_ISL_926008, EPI_ISL_926009, EPI_ISL_926010, EPI_ISL_926011, EPI_ISL_926012, EPI_ISL_926013, EPI_ISL_926014, EPI_ISL_926015, EPI_ISL_926016, EPI_ISL_926017, EPI_ISL_926018, EPI_ISL_926019, EPI_ISL_926020, EPI_ISL_926021, EPI_ISL_926022, EPI_ISL_926023, EPI_ISL_926024, EPI_ISL_926025, EPI_ISL_926026, EPI_ISL_926027, EPI_ISL_926028, EPI_ISL_926029, EPI_ISL_926030, EPI_ISL_926031, EPI_ISL_926032, EPI_ISL_926033, EPI_ISL_926034, EPI_ISL_926035, EPI_ISL_926036, EPI_ISL_926037, EPI_ISL_926038, EPI_ISL_926039, EPI_ISL_926040, EPI_ISL_926041, EPI_ISL_926042, EPI_ISL_926043, EPI_ISL_926044, EPI_ISL_926045, EPI_ISL_926046, EPI_ISL_926047, EPI_ISL_926048, EPI_ISL_926049, EPI_ISL_926050, EPI_ISL_926051, EPI_ISL_926052, EPI_ISL_926053, EPI_ISL_926054, EPI_ISL_926055, EPI_ISL_926056, EPI_ISL_926057, EPI_ISL_926058, EPI_ISL_926059, EPI_ISL_926060, EPI_ISL_926061, EPI_ISL_926062, EPI_ISL_926063, EPI_ISL_926064, EPI_ISL_926065, EPI_ISL_926066, EPI_ISL_926067, EPI_ISL_926068, EPI_ISL_926069, EPI_ISL_926070, EPI_ISL_926071, EPI_ISL_926072, EPI_ISL_926073, EPI_ISL_926074, EPI_ISL_926075, EPI_ISL_926076, EPI_ISL_926077, EPI_ISL_926078, EPI_ISL_926079, EPI_ISL_926080, EPI_ISL_926081, EPI_ISL_926082, EPI_ISL_926083, EPI_ISL_926084, EPI_ISL_926085, EPI_ISL_926086, EPI_ISL_926087, EPI_ISL_926088, EPI_ISL_926089, EPI_ISL_926090, EPI_ISL_926091, EPI_ISL_926092, EPI_ISL_926093, EPI_ISL_926094, EPI_ISL_926095, EPI_ISL_926096, EPI_ISL_926097, EPI_ISL_926098, EPI_ISL_926099, EPI_ISL_926100, EPI_ISL_926101, EPI_ISL_926102, EPI_ISL_926103, EPI_ISL_926104, EPI_ISL_926105, EPI_ISL_926106, EPI_ISL_926107, EPI_ISL_926108, EPI_ISL_926109, EPI_ISL_926110, EPI_ISL_926111, EPI_ISL_926112, EPI_ISL_926113, EPI_ISL_926114, EPI_ISL_926115, EPI_ISL_926116, EPI_ISL_926117, EPI_ISL_926118, EPI_ISL_926119, EPI_ISL_926120, EPI_ISL_926121, EPI_ISL_926122, EPI_ISL_926123, EPI_ISL_926124, EPI_ISL_926125, EPI_ISL_926126, EPI_ISL_926127, EPI_ISL_926128, EPI_ISL_926129, EPI_ISL_926130, EPI_ISL_926131, EPI_ISL_926132, EPI_ISL_926133, EPI_ISL_926134, EPI_ISL_926135, EPI_ISL_926136, EPI_ISL_926137                                                                                                                                                                                                                                                                                                                                                                                                                                                                                                                                                                                                                                                                                                                                                                                                                                                                                                                                                                                                                                                                                                                              |                                                                                                             |                                                                                                                      |                                                                                                                                                                                                                                                                 |
| see above                                                                                                                                                                                                                                                                                                                                                                                                                                                                                                                                                                                                                                                                                                                                                                                                                                                                                                                                                                                                                                                                                                                                                                                                                                                                                                                                                                                                                                                                                                                                                                                                                                                                                                                                                                                                                                                                                                                                                                                                                                                                                                                                                                                                                                                                                                                                                                                                                                                                                                                                                                                                                                                                                                                                                                                                                                                                                                                                                                                                                                                                                                                                                                                                                                                                                                                                                                                                                                                                                                                                                                                                                                                                                                                                                                                                                                                                                                                                                                                                                                                                                                                                                                                                                                                                                                                                                                                                                                                                                                                                                                                                                                                                                                                                                                                                                                                                                                                                                                                                                                                                                                                                                                                                                                                                                                                                                                                                                                                                                                                                                                                                                                                                                                                                                                                                                                                                                                                                                                   | Nucleic Acid Testing, National Reference Laboratory                                                         | GIGA Medical Genomics                                                                                                | Yvan Butera, Keith Durkin, Maria Artesi, Bouchra Boujemla, Robert Rutayisire, Patrick Tuyisenge, Esperence Umumararungu, Sébastien Bontems, Marie-Pierre Hayette, Nathalie Renotte, Swaibu Gatare, Jacob Souppgui, Sabin Nsanzimana, Vincent Bours, Léon Mutesa |
| EPI_ISL_933715                                                                                                                                                                                                                                                                                                                                                                                                                                                                                                                                                                                                                                                                                                                                                                                                                                                                                                                                                                                                                                                                                                                                                                                                                                                                                                                                                                                                                                                                                                                                                                                                                                                                                                                                                                                                                                                                                                                                                                                                                                                                                                                                                                                                                                                                                                                                                                                                                                                                                                                                                                                                                                                                                                                                                                                                                                                                                                                                                                                                                                                                                                                                                                                                                                                                                                                                                                                                                                                                                                                                                                                                                                                                                                                                                                                                                                                                                                                                                                                                                                                                                                                                                                                                                                                                                                                                                                                                                                                                                                                                                                                                                                                                                                                                                                                                                                                                                                                                                                                                                                                                                                                                                                                                                                                                                                                                                                                                                                                                                                                                                                                                                                                                                                                                                                                                                                                                                                                                                              | Laboratoire de Recherche et d'Analyses Medicales de la Gendarmerie Royale                                   | Laboratoire de Recherche et d'Analyses Medicales de la Gendarmerie Royale                                            | Sanaâ Lemriss, Amal Souiri, Nabil Lemzaoui, Momammed Labioui, elmostafa El Fahime, Saâd El kabbaï                                                                                                                                                               |
| EPI_ISL_933719                                                                                                                                                                                                                                                                                                                                                                                                                                                                                                                                                                                                                                                                                                                                                                                                                                                                                                                                                                                                                                                                                                                                                                                                                                                                                                                                                                                                                                                                                                                                                                                                                                                                                                                                                                                                                                                                                                                                                                                                                                                                                                                                                                                                                                                                                                                                                                                                                                                                                                                                                                                                                                                                                                                                                                                                                                                                                                                                                                                                                                                                                                                                                                                                                                                                                                                                                                                                                                                                                                                                                                                                                                                                                                                                                                                                                                                                                                                                                                                                                                                                                                                                                                                                                                                                                                                                                                                                                                                                                                                                                                                                                                                                                                                                                                                                                                                                                                                                                                                                                                                                                                                                                                                                                                                                                                                                                                                                                                                                                                                                                                                                                                                                                                                                                                                                                                                                                                                                                              | Laboratoire de Recherche et d'Analyses Medicales de la Gendarmerie Royale                                   | Laboratoire de Recherche et d'Analyses Medicales de la Gendarmerie Royale                                            | Sanaâ Lemriss, Amal Souiri, Nabil Lemzaoui, Mohammed Labioui, elmostafa El Fahime, S. El kabbaï                                                                                                                                                                 |
| EPI_ISL_939656, EPI_ISL_939657, EPI_ISL_939658, EPI_ISL_939659, EPI_ISL_940067                                                                                                                                                                                                                                                                                                                                                                                                                                                                                                                                                                                                                                                                                                                                                                                                                                                                                                                                                                                                                                                                                                                                                                                                                                                                                                                                                                                                                                                                                                                                                                                                                                                                                                                                                                                                                                                                                                                                                                                                                                                                                                                                                                                                                                                                                                                                                                                                                                                                                                                                                                                                                                                                                                                                                                                                                                                                                                                                                                                                                                                                                                                                                                                                                                                                                                                                                                                                                                                                                                                                                                                                                                                                                                                                                                                                                                                                                                                                                                                                                                                                                                                                                                                                                                                                                                                                                                                                                                                                                                                                                                                                                                                                                                                                                                                                                                                                                                                                                                                                                                                                                                                                                                                                                                                                                                                                                                                                                                                                                                                                                                                                                                                                                                                                                                                                                                                                                              | National Institute for Communicable Diseases, National Health Laboratory Services, Gauteng, South Africa    | National Institute for Communicable Diseases of the National Health Laboratory Service                               | Amoako DG, Mohale T, Ntuli N, Mahlangu B, Allam M, Ismail A, Bhiman JN                                                                                                                                                                                          |
| EPI_ISL_940075, EPI_ISL_940076, EPI_ISL_940077, EPI_ISL_940078, EPI_ISL_940079, EPI_ISL_940080, EPI_ISL_940081, EPI_ISL_940082, EPI_ISL_940083, EPI_ISL_940084, EPI_ISL_940085, EPI_ISL_940086, EPI_ISL_940087, EPI_ISL_940088, EPI_ISL_940089, EPI_ISL_940090, EPI_ISL_940091, EPI_ISL_940092, EPI_ISL_940093, EPI_ISL_940094, EPI_ISL_940095, EPI_ISL_940096, EPI_ISL_940097, EPI_ISL_940098, EPI_ISL_940099, EPI_ISL_940100, EPI_ISL_940101, EPI_ISL_940102, EPI_ISL_940103, EPI_ISL_940104, EPI_ISL_940105, EPI_ISL_940106, EPI_ISL_940107, EPI_ISL_940108, EPI_ISL_940109, EPI_ISL_940110, EPI_ISL_940111, EPI_ISL_940112, EPI_ISL_940113, EPI_ISL_940114, EPI_ISL_940115, EPI_ISL_940116, EPI_ISL_940117, EPI_ISL_940118, EPI_ISL_940119, EPI_ISL_940120, EPI_ISL_940121, EPI_ISL_940122, EPI_ISL_940123, EPI_ISL_940124, EPI_ISL_940125, EPI_ISL_940126, EPI_ISL_940127, EPI_ISL_940128, EPI_ISL_940129, EPI_ISL_940130, EPI_ISL_940131, EPI_ISL_940132, EPI_ISL_940133, EPI_ISL_940134, EPI_ISL_940135, EPI_ISL_940136, EPI_ISL_940137                                                                                                                                                                                                                                                                                                                                                                                                                                                                                                                                                                                                                                                                                                                                                                                                                                                                                                                                                                                                                                                                                                                                                                                                                                                                                                                                                                                                                                                                                                                                                                                                                                                                                                                                                                                                                                                                                                                                                                                                                                                                                                                                                                                                                                                                                                                                                                                                                                                                                                                                                                                                                                                                                                                                                                                                                                                                                                                                                                                                                                                                                                                                                                                                                                                                                                                                                                                                                                                                                                                                                                                                                                                                                                                                                                                                                                                                                                                                                                                                                                                                                                                                                                                                                                                                                                                                                                                                                                                                                                                                                                                                                                                                                                                                                                                                                                                                                                                              |                                                                                                             |                                                                                                                      |                                                                                                                                                                                                                                                                 |
| see above                                                                                                                                                                                                                                                                                                                                                                                                                                                                                                                                                                                                                                                                                                                                                                                                                                                                                                                                                                                                                                                                                                                                                                                                                                                                                                                                                                                                                                                                                                                                                                                                                                                                                                                                                                                                                                                                                                                                                                                                                                                                                                                                                                                                                                                                                                                                                                                                                                                                                                                                                                                                                                                                                                                                                                                                                                                                                                                                                                                                                                                                                                                                                                                                                                                                                                                                                                                                                                                                                                                                                                                                                                                                                                                                                                                                                                                                                                                                                                                                                                                                                                                                                                                                                                                                                                                                                                                                                                                                                                                                                                                                                                                                                                                                                                                                                                                                                                                                                                                                                                                                                                                                                                                                                                                                                                                                                                                                                                                                                                                                                                                                                                                                                                                                                                                                                                                                                                                                                                   | Charlotte Maxeke Johannesburg Academic Hospital, National Health Laboratory Services, Gauteng, South Africa | National Institute for Communicable Diseases of the National Health Laboratory Service                               | Amoako DG, Mohale T, Ntuli N, Mahlangu B, Allam M, Ismail A, Bhiman JN                                                                                                                                                                                          |
| EPI_ISL_940138, EPI_ISL_940139, EPI_ISL_940140, EPI_ISL_940141, EPI_ISL_940142, EPI_ISL_940143                                                                                                                                                                                                                                                                                                                                                                                                                                                                                                                                                                                                                                                                                                                                                                                                                                                                                                                                                                                                                                                                                                                                                                                                                                                                                                                                                                                                                                                                                                                                                                                                                                                                                                                                                                                                                                                                                                                                                                                                                                                                                                                                                                                                                                                                                                                                                                                                                                                                                                                                                                                                                                                                                                                                                                                                                                                                                                                                                                                                                                                                                                                                                                                                                                                                                                                                                                                                                                                                                                                                                                                                                                                                                                                                                                                                                                                                                                                                                                                                                                                                                                                                                                                                                                                                                                                                                                                                                                                                                                                                                                                                                                                                                                                                                                                                                                                                                                                                                                                                                                                                                                                                                                                                                                                                                                                                                                                                                                                                                                                                                                                                                                                                                                                                                                                                                                                                              | National Institute for Communicable Diseases, National Health Laboratory Services, Gauteng, South Africa    | National Institute for Communicable Diseases of the National Health Laboratory Service                               | Amoako DG, Mohale T, Ntuli N, Mahlangu B, Allam M, Ismail A, Bhiman JN                                                                                                                                                                                          |
| EPI_ISL_940147, EPI_ISL_940148, EPI_ISL_940149, EPI_ISL_940150, EPI_ISL_940151, EPI_ISL_940152, EPI_ISL_940153, EPI_ISL_940154, EPI_ISL_940155, EPI_ISL_940156                                                                                                                                                                                                                                                                                                                                                                                                                                                                                                                                                                                                                                                                                                                                                                                                                                                                                                                                                                                                                                                                                                                                                                                                                                                                                                                                                                                                                                                                                                                                                                                                                                                                                                                                                                                                                                                                                                                                                                                                                                                                                                                                                                                                                                                                                                                                                                                                                                                                                                                                                                                                                                                                                                                                                                                                                                                                                                                                                                                                                                                                                                                                                                                                                                                                                                                                                                                                                                                                                                                                                                                                                                                                                                                                                                                                                                                                                                                                                                                                                                                                                                                                                                                                                                                                                                                                                                                                                                                                                                                                                                                                                                                                                                                                                                                                                                                                                                                                                                                                                                                                                                                                                                                                                                                                                                                                                                                                                                                                                                                                                                                                                                                                                                                                                                                                              | NHLS Universitas Academic                                                                                   | UFS Virology                                                                                                         | PA Bester, MM Nyaga, P Nthiga, MT Mogotsi, D Goedhals, T de Oliveira                                                                                                                                                                                            |
| EPI_ISL_940850, EPI_ISL_940851, EPI_ISL_940853, EPI_ISL_940854, EPI_ISL_940855, EPI_ISL_940857, EPI_ISL_940858, EPI_ISL_940859, EPI_ISL_940861, EPI_ISL_940863, EPI_ISL_940872, EPI_ISL_940873, EPI_ISL_940877, EPI_ISL_940878, EPI_ISL_940879, EPI_ISL_940880, EPI_ISL_940881, EPI_ISL_940882, EPI_ISL_940883, EPI_ISL_940884, EPI_ISL_940885                                                                                                                                                                                                                                                                                                                                                                                                                                                                                                                                                                                                                                                                                                                                                                                                                                                                                                                                                                                                                                                                                                                                                                                                                                                                                                                                                                                                                                                                                                                                                                                                                                                                                                                                                                                                                                                                                                                                                                                                                                                                                                                                                                                                                                                                                                                                                                                                                                                                                                                                                                                                                                                                                                                                                                                                                                                                                                                                                                                                                                                                                                                                                                                                                                                                                                                                                                                                                                                                                                                                                                                                                                                                                                                                                                                                                                                                                                                                                                                                                                                                                                                                                                                                                                                                                                                                                                                                                                                                                                                                                                                                                                                                                                                                                                                                                                                                                                                                                                                                                                                                                                                                                                                                                                                                                                                                                                                                                                                                                                                                                                                                                              |                                                                                                             |                                                                                                                      |                                                                                                                                                                                                                                                                 |
| see above                                                                                                                                                                                                                                                                                                                                                                                                                                                                                                                                                                                                                                                                                                                                                                                                                                                                                                                                                                                                                                                                                                                                                                                                                                                                                                                                                                                                                                                                                                                                                                                                                                                                                                                                                                                                                                                                                                                                                                                                                                                                                                                                                                                                                                                                                                                                                                                                                                                                                                                                                                                                                                                                                                                                                                                                                                                                                                                                                                                                                                                                                                                                                                                                                                                                                                                                                                                                                                                                                                                                                                                                                                                                                                                                                                                                                                                                                                                                                                                                                                                                                                                                                                                                                                                                                                                                                                                                                                                                                                                                                                                                                                                                                                                                                                                                                                                                                                                                                                                                                                                                                                                                                                                                                                                                                                                                                                                                                                                                                                                                                                                                                                                                                                                                                                                                                                                                                                                                                                   | Vaccines and Infectious Diseases Analytics Research Unit (VIDA)                                             | KRISP, KZN Research Innovation and Sequencing Platform                                                               | Baillie Vicky, du Plessis Jeanine, Giandhari Jennifer, Pillay Sureshnee, Naidoo Yeshnee, Tegally Hourriyah, de Oliveira Tulio, Madhi Shabir                                                                                                                     |
| EPI_ISL_941275, EPI_ISL_941276, EPI_ISL_941277, EPI_ISL_941278, EPI_ISL_941279, EPI_ISL_941280, EPI_ISL_941281, EPI_ISL_941282, EPI_ISL_941283, EPI_ISL_941284, EPI_ISL_941285, EPI_ISL_941286, EPI_ISL_941287, EPI_ISL_941289, EPI_ISL_941290, EPI_ISL_941291, EPI_ISL_941295                                                                                                                                                                                                                                                                                                                                                                                                                                                                                                                                                                                                                                                                                                                                                                                                                                                                                                                                                                                                                                                                                                                                                                                                                                                                                                                                                                                                                                                                                                                                                                                                                                                                                                                                                                                                                                                                                                                                                                                                                                                                                                                                                                                                                                                                                                                                                                                                                                                                                                                                                                                                                                                                                                                                                                                                                                                                                                                                                                                                                                                                                                                                                                                                                                                                                                                                                                                                                                                                                                                                                                                                                                                                                                                                                                                                                                                                                                                                                                                                                                                                                                                                                                                                                                                                                                                                                                                                                                                                                                                                                                                                                                                                                                                                                                                                                                                                                                                                                                                                                                                                                                                                                                                                                                                                                                                                                                                                                                                                                                                                                                                                                                                                                              |                                                                                                             |                                                                                                                      |                                                                                                                                                                                                                                                                 |
| see above                                                                                                                                                                                                                                                                                                                                                                                                                                                                                                                                                                                                                                                                                                                                                                                                                                                                                                                                                                                                                                                                                                                                                                                                                                                                                                                                                                                                                                                                                                                                                                                                                                                                                                                                                                                                                                                                                                                                                                                                                                                                                                                                                                                                                                                                                                                                                                                                                                                                                                                                                                                                                                                                                                                                                                                                                                                                                                                                                                                                                                                                                                                                                                                                                                                                                                                                                                                                                                                                                                                                                                                                                                                                                                                                                                                                                                                                                                                                                                                                                                                                                                                                                                                                                                                                                                                                                                                                                                                                                                                                                                                                                                                                                                                                                                                                                                                                                                                                                                                                                                                                                                                                                                                                                                                                                                                                                                                                                                                                                                                                                                                                                                                                                                                                                                                                                                                                                                                                                                   | Nigeria Centre for Disease Control (NCDC)                                                                   | African Centre of Excellence for Genomics of Infectious Diseases (ACEGID), Redeemer's University                     | Oluniyi P.E. et al                                                                                                                                                                                                                                              |
| EPI_ISL_944126, EPI_ISL_944129, EPI_ISL_944140, EPI_ISL_944141, EPI_ISL_944142, EPI_ISL_944143, EPI_ISL_944149                                                                                                                                                                                                                                                                                                                                                                                                                                                                                                                                                                                                                                                                                                                                                                                                                                                                                                                                                                                                                                                                                                                                                                                                                                                                                                                                                                                                                                                                                                                                                                                                                                                                                                                                                                                                                                                                                                                                                                                                                                                                                                                                                                                                                                                                                                                                                                                                                                                                                                                                                                                                                                                                                                                                                                                                                                                                                                                                                                                                                                                                                                                                                                                                                                                                                                                                                                                                                                                                                                                                                                                                                                                                                                                                                                                                                                                                                                                                                                                                                                                                                                                                                                                                                                                                                                                                                                                                                                                                                                                                                                                                                                                                                                                                                                                                                                                                                                                                                                                                                                                                                                                                                                                                                                                                                                                                                                                                                                                                                                                                                                                                                                                                                                                                                                                                                                                              | National Health Laboratory Service, South Africa                                                            | KRISP, KZN Research Innovation and Sequencing Platform                                                               | Laguda-Akingba O, Giandhari J, Pillay S, Lessells R, Mdlalose K, York D, Khan S, Emmanuel SJ, Tegally H, Wilkinson E, de Oliveira T                                                                                                                             |
| EPI_ISL_949125                                                                                                                                                                                                                                                                                                                                                                                                                                                                                                                                                                                                                                                                                                                                                                                                                                                                                                                                                                                                                                                                                                                                                                                                                                                                                                                                                                                                                                                                                                                                                                                                                                                                                                                                                                                                                                                                                                                                                                                                                                                                                                                                                                                                                                                                                                                                                                                                                                                                                                                                                                                                                                                                                                                                                                                                                                                                                                                                                                                                                                                                                                                                                                                                                                                                                                                                                                                                                                                                                                                                                                                                                                                                                                                                                                                                                                                                                                                                                                                                                                                                                                                                                                                                                                                                                                                                                                                                                                                                                                                                                                                                                                                                                                                                                                                                                                                                                                                                                                                                                                                                                                                                                                                                                                                                                                                                                                                                                                                                                                                                                                                                                                                                                                                                                                                                                                                                                                                                                              | Virology, National Health Laboratory Service, Charlotte Maxeke Johannesburg Academic Institute              | Virology, National Health Laboratory Service, Charlotte Maxeke Johannesburg Academic Institute                       | Kathleen Subramoney, Mushal Ali, Ashard Ismail, Thabo Mohale, Florette K. Treurnicht                                                                                                                                                                            |
| EPI_ISL_949187                                                                                                                                                                                                                                                                                                                                                                                                                                                                                                                                                                                                                                                                                                                                                                                                                                                                                                                                                                                                                                                                                                                                                                                                                                                                                                                                                                                                                                                                                                                                                                                                                                                                                                                                                                                                                                                                                                                                                                                                                                                                                                                                                                                                                                                                                                                                                                                                                                                                                                                                                                                                                                                                                                                                                                                                                                                                                                                                                                                                                                                                                                                                                                                                                                                                                                                                                                                                                                                                                                                                                                                                                                                                                                                                                                                                                                                                                                                                                                                                                                                                                                                                                                                                                                                                                                                                                                                                                                                                                                                                                                                                                                                                                                                                                                                                                                                                                                                                                                                                                                                                                                                                                                                                                                                                                                                                                                                                                                                                                                                                                                                                                                                                                                                                                                                                                                                                                                                                                              | Virology, NHLS, CMJAH                                                                                       | Virology, NHLS, CMJAH                                                                                                | Kathleen Subramoney, Mushal Ali, Arshad Ismail, Thabo Mohale, Florette K. Treurnicht                                                                                                                                                                            |
| EPI_ISL_949618, EPI_ISL_949620, EPI_ISL_949622, EPI_ISL_949624, EPI_ISL_949626, EPI_ISL_949628, EPI_ISL_949630, EPI_ISL_949632, EPI_ISL_949634                                                                                                                                                                                                                                                                                                                                                                                                                                                                                                                                                                                                                                                                                                                                                                                                                                                                                                                                                                                                                                                                                                                                                                                                                                                                                                                                                                                                                                                                                                                                                                                                                                                                                                                                                                                                                                                                                                                                                                                                                                                                                                                                                                                                                                                                                                                                                                                                                                                                                                                                                                                                                                                                                                                                                                                                                                                                                                                                                                                                                                                                                                                                                                                                                                                                                                                                                                                                                                                                                                                                                                                                                                                                                                                                                                                                                                                                                                                                                                                                                                                                                                                                                                                                                                                                                                                                                                                                                                                                                                                                                                                                                                                                                                                                                                                                                                                                                                                                                                                                                                                                                                                                                                                                                                                                                                                                                                                                                                                                                                                                                                                                                                                                                                                                                                                                                              | NHLS Universitas Academic                                                                                   | UFS Virology                                                                                                         | PA Bester, MM Nyaga, P Nthiga, MT Mogotsi, Emmanuel Ogunbayo, D Goedhals, T de Oliveira                                                                                                                                                                         |
| EPI_ISL_953402, EPI_ISL_953403, EPI_ISL_953404, EPI_ISL_953405, EPI_ISL_953406, EPI_ISL_953407, EPI_ISL_953408, EPI_ISL_953409, EPI_ISL_953410, EPI_ISL_953411, EPI_ISL_953412, EPI_ISL_953413, EPI_ISL_953414, EPI_ISL_953415, EPI_ISL_953416, EPI_ISL_953417, EPI_ISL_953418, EPI_ISL_953419, EPI_ISL_953420, EPI_ISL_953421, EPI_ISL_953422, EPI_ISL_953423, EPI_ISL_953424, EPI_ISL_953425                                                                                                                                                                                                                                                                                                                                                                                                                                                                                                                                                                                                                                                                                                                                                                                                                                                                                                                                                                                                                                                                                                                                                                                                                                                                                                                                                                                                                                                                                                                                                                                                                                                                                                                                                                                                                                                                                                                                                                                                                                                                                                                                                                                                                                                                                                                                                                                                                                                                                                                                                                                                                                                                                                                                                                                                                                                                                                                                                                                                                                                                                                                                                                                                                                                                                                                                                                                                                                                                                                                                                                                                                                                                                                                                                                                                                                                                                                                                                                                                                                                                                                                                                                                                                                                                                                                                                                                                                                                                                                                                                                                                                                                                                                                                                                                                                                                                                                                                                                                                                                                                                                                                                                                                                                                                                                                                                                                                                                                                                                                                                                              |                                                                                                             |                                                                                                                      |                                                                                                                                                                                                                                                                 |
| see above                                                                                                                                                                                                                                                                                                                                                                                                                                                                                                                                                                                                                                                                                                                                                                                                                                                                                                                                                                                                                                                                                                                                                                                                                                                                                                                                                                                                                                                                                                                                                                                                                                                                                                                                                                                                                                                                                                                                                                                                                                                                                                                                                                                                                                                                                                                                                                                                                                                                                                                                                                                                                                                                                                                                                                                                                                                                                                                                                                                                                                                                                                                                                                                                                                                                                                                                                                                                                                                                                                                                                                                                                                                                                                                                                                                                                                                                                                                                                                                                                                                                                                                                                                                                                                                                                                                                                                                                                                                                                                                                                                                                                                                                                                                                                                                                                                                                                                                                                                                                                                                                                                                                                                                                                                                                                                                                                                                                                                                                                                                                                                                                                                                                                                                                                                                                                                                                                                                                                                   | Laboratorio de Investigaciones de Baney                                                                     | "Swiss Tropical and Public Health Institute"                                                                         | "Carlos Cortes, Claudia Daubenberger, Guillermo Garcia, Salome Hosch, Bonifacio Manguire Nlavo, Maximilian Mpina, Elizabeth Nyakarungu, Diosdado Ojama Nseng Ada, Mitoha Ondo O Ayekaba, Tobias Schindler, Philip Wonder Phiri"                                 |
| EPI_ISL_954227, EPI_ISL_954228, EPI_ISL_954229, EPI_ISL_954230, EPI_ISL_954231, EPI_ISL_954232, EPI_ISL_954233, EPI_ISL_954234, EPI_ISL_954235, EPI_ISL_954236, EPI_ISL_954237, EPI_ISL_954238, EPI_ISL_954239, EPI_ISL_954240, EPI_ISL_954241, EPI_ISL_954242, EPI_ISL_954243, EPI_ISL_954244, EPI_ISL_954245, EPI_ISL_954246, EPI_ISL_954247, EPI_ISL_954248, EPI_ISL_954249, EPI_ISL_954250, EPI_ISL_954251, EPI_ISL_954252, EPI_ISL_954253, EPI_ISL_954254, EPI_ISL_954255, EPI_ISL_954256, EPI_ISL_954257, EPI_ISL_954258, EPI_ISL_954259, EPI_ISL_954260, EPI_ISL_954261, EPI_ISL_954262, EPI_ISL_954263, EPI_ISL_954264, EPI_ISL_954265, EPI_ISL_954266, EPI_ISL_954267, EPI_ISL_954268, EPI_ISL_954269, EPI_ISL_954270, EPI_ISL_954271, EPI_ISL_954272, EPI_ISL_954273, EPI_ISL_954274, EPI_ISL_954275, EPI_ISL_954276, EPI_ISL_954277, EPI_ISL_954278, EPI_ISL_954279, EPI_ISL_954280, EPI_ISL_954281, EPI_ISL_954282, EPI_ISL_954283, EPI_ISL_954284, EPI_ISL_954285, EPI_ISL_954286, EPI_ISL_954287, EPI_ISL_954288, EPI_ISL_954289, EPI_ISL_954290, EPI_ISL_954291, EPI_ISL_954292, EPI_ISL_954293, EPI_ISL_954294, EPI_ISL_954295, EPI_ISL_954296, EPI_ISL_954297, EPI_ISL_954298, EPI_ISL_954299, EPI_ISL_954300, EPI_ISL_954301, EPI_ISL_954302, EPI_ISL_954303, EPI_ISL_954304, EPI_ISL_954305, EPI_ISL_954306, EPI_ISL_954307, EPI_ISL_954308, EPI_ISL_954309, EPI_ISL_954310, EPI_ISL_954311, EPI_ISL_954312, EPI_ISL_954313, EPI_ISL_954314, EPI_ISL_954315, EPI_ISL_954316, EPI_ISL_954317, EPI_ISL_954318, EPI_ISL_954319, EPI_ISL_954320, EPI_ISL_954321, EPI_ISL_954322, EPI_ISL_954323, EPI_ISL_954324, EPI_ISL_954325, EPI_ISL_954326, EPI_ISL_954327, EPI_ISL_954328, EPI_ISL_954329, EPI_ISL_954330, EPI_ISL_954331, EPI_ISL_954332, EPI_ISL_954333, EPI_ISL_954334, EPI_ISL_954335, EPI_ISL_954336, EPI_ISL_954337, EPI_ISL_954338, EPI_ISL_954339, EPI_ISL_954340, EPI_ISL_954341, EPI_ISL_954342, EPI_ISL_954343, EPI_ISL_954344, EPI_ISL_954345, EPI_ISL_954346, EPI_ISL_954347, EPI_ISL_954348, EPI_ISL_954349, EPI_ISL_954350, EPI_ISL_954351, EPI_ISL_954352, EPI_ISL_954353, EPI_ISL_954354, EPI_ISL_954355, EPI_ISL_954356, EPI_ISL_954357, EPI_ISL_954358, EPI_ISL_954359, EPI_ISL_954360, EPI_ISL_954361, EPI_ISL_954362, EPI_ISL_954363, EPI_ISL_954364, EPI_ISL_954365, EPI_ISL_954366, EPI_ISL_954367, EPI_ISL_954368, EPI_ISL_954369, EPI_ISL_954370, EPI_ISL_954371, EPI_ISL_954372, EPI_ISL_954373, EPI_ISL_954374, EPI_ISL_954375, EPI_ISL_954376, EPI_ISL_954377, EPI_ISL_954378, EPI_ISL_954379, EPI_ISL_954380, EPI_ISL_954381, EPI_ISL_954382, EPI_ISL_954383, EPI_ISL_954384, EPI_ISL_954385, EPI_ISL_954386, EPI_ISL_954387, EPI_ISL_954388, EPI_ISL_954389, EPI_ISL_954390, EPI_ISL_954391, EPI_ISL_954392, EPI_ISL_954393, EPI_ISL_954394, EPI_ISL_954395, EPI_ISL_954396, EPI_ISL_954397, EPI_ISL_954398, EPI_ISL_954399, EPI_ISL_954400, EPI_ISL_954401, EPI_ISL_954402, EPI_ISL_954403, EPI_ISL_954404, EPI_ISL_954405, EPI_ISL_954406, EPI_ISL_954407, EPI_ISL_954408, EPI_ISL_954409, EPI_ISL_954410, EPI_ISL_954411, EPI_ISL_954412, EPI_ISL_954413, EPI_ISL_954414, EPI_ISL_954415, EPI_ISL_954416, EPI_ISL_954417, EPI_ISL_954418, EPI_ISL_954419, EPI_ISL_954420, EPI_ISL_954421, EPI_ISL_954422, EPI_ISL_954423, EPI_ISL_954424, EPI_ISL_954425, EPI_ISL_954426, EPI_ISL_954427, EPI_ISL_954428, EPI_ISL_954429, EPI_ISL_954430, EPI_ISL_954431, EPI_ISL_954432, EPI_ISL_954433, EPI_ISL_954434, EPI_ISL_954435, EPI_ISL_954436, EPI_ISL_954437, EPI_ISL_954438, EPI_ISL_954439, EPI_ISL_954440, EPI_ISL_954441, EPI_ISL_954442, EPI_ISL_954443, EPI_ISL_954444, EPI_ISL_954445, EPI_ISL_954446, EPI_ISL_954447, EPI_ISL_954448, EPI_ISL_954449, EPI_ISL_954450, EPI_ISL_954451, EPI_ISL_954452, EPI_ISL_954453, EPI_ISL_954454, EPI_ISL_954455, EPI_ISL_954456, EPI_ISL_954457, EPI_ISL_954458, EPI_ISL_954459, EPI_ISL_954460, EPI_ISL_954461, EPI_ISL_954462, EPI_ISL_954463, EPI_ISL_954464, EPI_ISL_954465, EPI_ISL_954466, EPI_ISL_954467, EPI_ISL_954468, EPI_ISL_954469, EPI_ISL_954470, EPI_ISL_954471, EPI_ISL_954472, EPI_ISL_954473, EPI_ISL_954474, EPI_ISL_954475, EPI_ISL_954476, EPI_ISL_954477, EPI_ISL_954478, EPI_ISL_954479, EPI_ISL_954480, EPI_ISL_954481, EPI_ISL_954482, EPI_ISL_954483, EPI_ISL_954484, EPI_ISL_954485, EPI_ISL_954486, EPI_ISL_954487, EPI_ISL_954488, EPI_ISL_954489, EPI_ISL_954490, EPI_ISL_954491, EPI_ISL_954492, EPI_ISL_954493, EPI_ISL_954494, EPI_ISL_954495, EPI_ISL_954496, EPI_ISL_954497, EPI_ISL_954498, EPI_ISL_954499, EPI_ISL_954500, EPI_ISL_954501, EPI_ISL_954502, EPI_ISL_954503, EPI_ISL_954504, EPI_ISL_954505, EPI_ISL_954506, EPI_ISL_954507, EPI_ISL_954508, EPI_ISL_954509, EPI_ISL_954510, EPI_ISL_954511, EPI_ISL_954512, EPI_ISL_954513, EPI_ISL_954514, EPI_ISL_954515, EPI_ISL_954516, EPI_ISL_954517, EPI_ISL_954518, EPI_ISL_954519, EPI_ISL_954520, EPI_ISL_954521, EPI_ISL_954522, EPI_ISL_954523, EPI_ISL_954524, EPI_ISL_954525, EPI_ISL_954526, EPI_ISL_954527, EPI_ISL_954528, EPI_ISL_954529, EPI_ISL_954530, EPI_ISL_954531, EPI_ISL_954532, EPI_ISL_954533, EPI_ISL_954534, EPI_ISL_954535, EPI_ISL_954536, EPI_ISL_954537, EPI_ISL_954538, EPI_ISL_954539, EPI_ISL_954540, EPI_ISL_954541, EPI_ISL_954542, EPI_ISL_954543, EPI_ISL_954544, EPI_ISL_954545, EPI_ISL_954546, EPI_ISL_954547, EPI_ISL_954548, EPI_ISL_954549, EPI_ISL_954550, EPI_ISL_954551, EPI_ISL_954552, EPI_ISL_954553, EPI_ISL_954554, EPI_ISL_954555, EPI_ISL_954556, EPI_ISL_954557, EPI_ISL_954558, EPI_ISL_954559, EPI_ISL_954560, EPI_ISL_954561, EPI_ISL_954562, EPI_ISL_954563, EPI_ISL_954564, EPI_ISL_954565, EPI_ISL_954566, EPI_ISL_954567, EPI_ISL_954568, EPI_ISL_954569, EPI_ISL_954570, EPI_ISL_954571, EPI_ISL_954572, EPI_ISL_954573, EPI_ISL_954574, EPI_ISL_954575, EPI_ISL_954576, EPI_ISL_954577, EPI_ISL_954578, EPI_ISL_954579, EPI_ISL_954580, EPI_ISL_954581, EPI_ISL_954582, EPI_ISL_954583, EPI_ISL_954584, EPI_ISL_954 |                                                                                                             |                                                                                                                      |                                                                                                                                                                                                                                                                 |









We gratefully acknowledge the following Authors from the Originating laboratories responsible for obtaining the specimens, as well as the Submitting laboratories where the genome data were generated and shared via GISAID, on which this research is based.

All Submitters of data may be contacted directly via [www.gisaid.org](http://www.gisaid.org)

Authors are sorted alphabetically.

| Accession ID                                                                                                                                                                                                                                                                                                                                                                                                                                                                                                                                                                                                                                                                                                                                                                                                                                                                                                                                                                                                                                                                                                                                                                                                                                                                                                                                                                                                                                                                                                                                                                                                                                                                                                                                                                                                                                                                                                                                                                                                                                                                                                                                                                                                                                                                                                                                                                                                                                                                                                                                                                                                                                                                                                                                                                                                                                                                                                                                                                                                                                                                                                                                                                                                                                                                                                                                                                                                                                                                                                                                                                                                                                                                                                                                                                                                                                                                                                                                                                                                                                                                                                                                                                                                                                                                                                                                                                                                                                                                                                                                                                                                                                                                                                                                                                                                                                                                                                                                                                                                                                                                                                                                                                                                                                                                                                                                                                                                                                                        | Originating Laboratory                                      | Submitting Laboratory                                                                    | Authors                                                                                                                                                                                                                     |
|---------------------------------------------------------------------------------------------------------------------------------------------------------------------------------------------------------------------------------------------------------------------------------------------------------------------------------------------------------------------------------------------------------------------------------------------------------------------------------------------------------------------------------------------------------------------------------------------------------------------------------------------------------------------------------------------------------------------------------------------------------------------------------------------------------------------------------------------------------------------------------------------------------------------------------------------------------------------------------------------------------------------------------------------------------------------------------------------------------------------------------------------------------------------------------------------------------------------------------------------------------------------------------------------------------------------------------------------------------------------------------------------------------------------------------------------------------------------------------------------------------------------------------------------------------------------------------------------------------------------------------------------------------------------------------------------------------------------------------------------------------------------------------------------------------------------------------------------------------------------------------------------------------------------------------------------------------------------------------------------------------------------------------------------------------------------------------------------------------------------------------------------------------------------------------------------------------------------------------------------------------------------------------------------------------------------------------------------------------------------------------------------------------------------------------------------------------------------------------------------------------------------------------------------------------------------------------------------------------------------------------------------------------------------------------------------------------------------------------------------------------------------------------------------------------------------------------------------------------------------------------------------------------------------------------------------------------------------------------------------------------------------------------------------------------------------------------------------------------------------------------------------------------------------------------------------------------------------------------------------------------------------------------------------------------------------------------------------------------------------------------------------------------------------------------------------------------------------------------------------------------------------------------------------------------------------------------------------------------------------------------------------------------------------------------------------------------------------------------------------------------------------------------------------------------------------------------------------------------------------------------------------------------------------------------------------------------------------------------------------------------------------------------------------------------------------------------------------------------------------------------------------------------------------------------------------------------------------------------------------------------------------------------------------------------------------------------------------------------------------------------------------------------------------------------------------------------------------------------------------------------------------------------------------------------------------------------------------------------------------------------------------------------------------------------------------------------------------------------------------------------------------------------------------------------------------------------------------------------------------------------------------------------------------------------------------------------------------------------------------------------------------------------------------------------------------------------------------------------------------------------------------------------------------------------------------------------------------------------------------------------------------------------------------------------------------------------------------------------------------------------------------------------------------------------------------------------------------|-------------------------------------------------------------|------------------------------------------------------------------------------------------|-----------------------------------------------------------------------------------------------------------------------------------------------------------------------------------------------------------------------------|
| EPI_ISL_1007984, EPI_ISL_1007985, EPI_ISL_1007987, EPI_ISL_1007988, EPI_ISL_1007989, EPI_ISL_1007990, EPI_ISL_1007991                                                                                                                                                                                                                                                                                                                                                                                                                                                                                                                                                                                                                                                                                                                                                                                                                                                                                                                                                                                                                                                                                                                                                                                                                                                                                                                                                                                                                                                                                                                                                                                                                                                                                                                                                                                                                                                                                                                                                                                                                                                                                                                                                                                                                                                                                                                                                                                                                                                                                                                                                                                                                                                                                                                                                                                                                                                                                                                                                                                                                                                                                                                                                                                                                                                                                                                                                                                                                                                                                                                                                                                                                                                                                                                                                                                                                                                                                                                                                                                                                                                                                                                                                                                                                                                                                                                                                                                                                                                                                                                                                                                                                                                                                                                                                                                                                                                                                                                                                                                                                                                                                                                                                                                                                                                                                                                                               | NHLS Universitas Academic                                   | UFS Virology                                                                             | PA Bester, MM Nyaga, P Nthiga, MT Mogotsi, Emmanuel Ogunbayo, D Goedhals, T de Oliveira                                                                                                                                     |
| EPI_ISL_1013099, EPI_ISL_1013100, EPI_ISL_1013101, EPI_ISL_1013102, EPI_ISL_1013103, EPI_ISL_1013104, EPI_ISL_1013105, EPI_ISL_1013106, EPI_ISL_1013107, EPI_ISL_1013108, EPI_ISL_1013109, EPI_ISL_1013110, EPI_ISL_1013111, EPI_ISL_1013112, EPI_ISL_1013113, EPI_ISL_1013114, EPI_ISL_1013115, EPI_ISL_1013116, EPI_ISL_1013117, EPI_ISL_1013118, EPI_ISL_1013119, EPI_ISL_1013120, EPI_ISL_1013121, EPI_ISL_1013122, EPI_ISL_1013123, EPI_ISL_1013124, EPI_ISL_1013125, EPI_ISL_1013126, EPI_ISL_1013127, EPI_ISL_1013128, EPI_ISL_1013129, EPI_ISL_1013130, EPI_ISL_1013131, EPI_ISL_1013132, EPI_ISL_1013133, EPI_ISL_1013134, EPI_ISL_1013135, EPI_ISL_1013136, EPI_ISL_1013137, EPI_ISL_1013138, EPI_ISL_1013139, EPI_ISL_1013140, EPI_ISL_1013141, EPI_ISL_1013142, EPI_ISL_1013143, EPI_ISL_1013144, EPI_ISL_1013145, EPI_ISL_1013146, EPI_ISL_1013147, EPI_ISL_1013148, EPI_ISL_1013149, EPI_ISL_1013150, EPI_ISL_1013151, EPI_ISL_1013152, EPI_ISL_1013153, EPI_ISL_1013154, EPI_ISL_1013155, EPI_ISL_1013156, EPI_ISL_1013157, EPI_ISL_1013158, EPI_ISL_1013159, EPI_ISL_1013160, EPI_ISL_1013161, EPI_ISL_1013162, EPI_ISL_1013163, EPI_ISL_1013164, EPI_ISL_1013165, EPI_ISL_1013166, EPI_ISL_1013167, EPI_ISL_1013168, EPI_ISL_1013169, EPI_ISL_1013170, EPI_ISL_1013171, EPI_ISL_1013172, EPI_ISL_1013173, EPI_ISL_1013174, EPI_ISL_1013175, EPI_ISL_1013176, EPI_ISL_1013177, EPI_ISL_1013178, EPI_ISL_1013179, EPI_ISL_1013180, EPI_ISL_1013181, EPI_ISL_1013182, EPI_ISL_1013183, EPI_ISL_1013184, EPI_ISL_1013185, EPI_ISL_1013186, EPI_ISL_1013187, EPI_ISL_1013188, EPI_ISL_1013189, EPI_ISL_1013190, EPI_ISL_1013191, EPI_ISL_1013192, EPI_ISL_1013193, EPI_ISL_1013194, EPI_ISL_1013195, EPI_ISL_1013196, EPI_ISL_1013197, EPI_ISL_1013198, EPI_ISL_1013199, EPI_ISL_1013200, EPI_ISL_1013201, EPI_ISL_1013202, EPI_ISL_1013203, EPI_ISL_1013204, EPI_ISL_1013205, EPI_ISL_1013206, EPI_ISL_1013207, EPI_ISL_1013208, EPI_ISL_1013209, EPI_ISL_1013210, EPI_ISL_1013211, EPI_ISL_1013212, EPI_ISL_1013213, EPI_ISL_1013214, EPI_ISL_1013215, EPI_ISL_1013216, EPI_ISL_1013217, EPI_ISL_1013218, EPI_ISL_1013219, EPI_ISL_1013220, EPI_ISL_1013221, EPI_ISL_1013222, EPI_ISL_1013223, EPI_ISL_1013224, EPI_ISL_1013225, EPI_ISL_1013226, EPI_ISL_1013227, EPI_ISL_1013228, EPI_ISL_1013229, EPI_ISL_1013230, EPI_ISL_1013231, EPI_ISL_1013232, EPI_ISL_1013233, EPI_ISL_1013234, EPI_ISL_1013235, EPI_ISL_1013236, EPI_ISL_1013237, EPI_ISL_1013238, EPI_ISL_1013239, EPI_ISL_1013240, EPI_ISL_1013241, EPI_ISL_1013242, EPI_ISL_1013243, EPI_ISL_1013244, EPI_ISL_1013245, EPI_ISL_1013246, EPI_ISL_1013247, EPI_ISL_1013248, EPI_ISL_1013249, EPI_ISL_1013250, EPI_ISL_1013251, EPI_ISL_1013252, EPI_ISL_1013253, EPI_ISL_1013254, EPI_ISL_1013255, EPI_ISL_1013256, EPI_ISL_1013257, EPI_ISL_1013258, EPI_ISL_1013259, EPI_ISL_1013260, EPI_ISL_1013261, EPI_ISL_1013262, EPI_ISL_1013263, EPI_ISL_1013264, EPI_ISL_1013265, EPI_ISL_1013266, EPI_ISL_1013267, EPI_ISL_1013268, EPI_ISL_1013269, EPI_ISL_1013270, EPI_ISL_1013271, EPI_ISL_1013272, EPI_ISL_1013273, EPI_ISL_1013274, EPI_ISL_1013275, EPI_ISL_1013276, EPI_ISL_1013277, EPI_ISL_1013278, EPI_ISL_1013279, EPI_ISL_1013280, EPI_ISL_1013281, EPI_ISL_1013282, EPI_ISL_1013283, EPI_ISL_1013284, EPI_ISL_1013285, EPI_ISL_1013286, EPI_ISL_1013287, EPI_ISL_1013288, EPI_ISL_1013289, EPI_ISL_1013290, EPI_ISL_1013291, EPI_ISL_1013292, EPI_ISL_1013293, EPI_ISL_1013294, EPI_ISL_1013295, EPI_ISL_1013296, EPI_ISL_1013297, EPI_ISL_1013298, EPI_ISL_1013299, EPI_ISL_1013300, EPI_ISL_1013301, EPI_ISL_1013302, EPI_ISL_1013303, EPI_ISL_1013304, EPI_ISL_1013305, EPI_ISL_1013306, EPI_ISL_1013307, EPI_ISL_1013308, EPI_ISL_1013309, EPI_ISL_1013310, EPI_ISL_1013311, EPI_ISL_1013312, EPI_ISL_1013313, EPI_ISL_1013314, EPI_ISL_1013315, EPI_ISL_1013316, EPI_ISL_1013317, EPI_ISL_1013318, EPI_ISL_1013319, EPI_ISL_1013320, EPI_ISL_1013321, EPI_ISL_1013322, EPI_ISL_1013323, EPI_ISL_1013324, EPI_ISL_1013325, EPI_ISL_1013326, EPI_ISL_1013327, EPI_ISL_1013328, EPI_ISL_1013329, EPI_ISL_1013330, EPI_ISL_1013331, EPI_ISL_1013332, EPI_ISL_1013333, EPI_ISL_1013334, EPI_ISL_1013335, EPI_ISL_1013336, EPI_ISL_1013337, EPI_ISL_1013338, EPI_ISL_1013339, EPI_ISL_1013340, EPI_ISL_1013341, EPI_ISL_1013342, EPI_ISL_1013343, EPI_ISL_1013344, EPI_ISL_1013345, EPI_ISL_1013346, EPI_ISL_1013347, EPI_ISL_1013348, EPI_ISL_1013349, EPI_ISL_1013350, EPI_ISL_1013351, EPI_ISL_1013352, EPI_ISL_1013353, EPI_ISL_1013354, EPI_ISL_1013355, EPI_ISL_1013356, EPI_ISL_1013357, EPI_ISL_1013358, EPI_ISL_1013359, EPI_ISL_1013360, EPI_ISL_1013361, EPI_ISL_1013362, EPI_ISL_1013363, EPI_ISL_1013364, EPI_ISL_1013365, EPI_ISL_1013366, EPI_ISL_1013367, EPI_ISL_1013368, EPI_ISL_1013369, EPI_ISL_1013370, EPI_ISL_1013371, EPI_ISL_1013372, EPI_ISL_1013373, EPI_ISL_1013374, EPI_ISL_1013375, EPI_ISL_1013376, EPI_ISL_1013377, EPI_ISL_1013378, EPI_ISL_1013379, EPI_ISL_1013380, EPI_ISL_1013381, EPI_ISL_1013382, EPI_ISL_1013383, EPI_ISL_1013384, EPI_ISL_1013385, EPI_ISL_1013386, EPI_ISL_1013387, EPI_ISL_1013388, EPI_ISL_1013389, EPI_ISL_1013390, EPI_ISL_1013391, EPI_ISL_1013392, EPI_ISL_1013393, EPI_ISL_1013394, EPI_ISL_1013395, EPI_ISL_1013396, EPI_ISL_1013397, EPI_ISL_1013398, EPI_ISL_1013399, EPI_ISL_1013400, EPI_ISL_1013401, EPI_ISL_1013402, EPI_ISL_1013403, EPI_ISL_1013404, EPI_ISL_1013405, EPI_ISL_1013406, EPI_ISL_1013407 | CH de Mayotte                                               | National Reference Center for Viruses of Respiratory Infections, Institut Pasteur, Paris | Marion Barbet, Sylvie Behillil, Méline Bizard, Angela Brisebarre, Camille Capel, Etienne Simon-Lorière, Vincent Enouf, Maud Vanpeene, Sylvie van der Werf, Combe Patrice                                                    |
| EPI_ISL_1018071, EPI_ISL_1018072, EPI_ISL_1018073, EPI_ISL_1018074, EPI_ISL_1018075, EPI_ISL_1018076, EPI_ISL_1018077, EPI_ISL_1018078, EPI_ISL_1018079, EPI_ISL_1018080, EPI_ISL_1018081, EPI_ISL_1018082, EPI_ISL_1018083, EPI_ISL_1018084, EPI_ISL_1018085, EPI_ISL_1018086, EPI_ISL_1018087                                                                                                                                                                                                                                                                                                                                                                                                                                                                                                                                                                                                                                                                                                                                                                                                                                                                                                                                                                                                                                                                                                                                                                                                                                                                                                                                                                                                                                                                                                                                                                                                                                                                                                                                                                                                                                                                                                                                                                                                                                                                                                                                                                                                                                                                                                                                                                                                                                                                                                                                                                                                                                                                                                                                                                                                                                                                                                                                                                                                                                                                                                                                                                                                                                                                                                                                                                                                                                                                                                                                                                                                                                                                                                                                                                                                                                                                                                                                                                                                                                                                                                                                                                                                                                                                                                                                                                                                                                                                                                                                                                                                                                                                                                                                                                                                                                                                                                                                                                                                                                                                                                                                                                     | Immunology, Noguchi Memorial Institute for Medical Research | Immunology, Noguchi Memorial Institute for Medical Research                              | Adu,B., Egyir,B., Kumordjie,S., Agbodji,B., Yeboah,C., Mohhtar,Q., Otef,F., Owusu-Nyantakyi,C., Asare,K.M., Appiah-Kubi,J., Adusei-Poku,M.A., Odom,J.K., Ampofo,W.K., Bonney,J.K.                                           |
| EPI_ISL_1027628                                                                                                                                                                                                                                                                                                                                                                                                                                                                                                                                                                                                                                                                                                                                                                                                                                                                                                                                                                                                                                                                                                                                                                                                                                                                                                                                                                                                                                                                                                                                                                                                                                                                                                                                                                                                                                                                                                                                                                                                                                                                                                                                                                                                                                                                                                                                                                                                                                                                                                                                                                                                                                                                                                                                                                                                                                                                                                                                                                                                                                                                                                                                                                                                                                                                                                                                                                                                                                                                                                                                                                                                                                                                                                                                                                                                                                                                                                                                                                                                                                                                                                                                                                                                                                                                                                                                                                                                                                                                                                                                                                                                                                                                                                                                                                                                                                                                                                                                                                                                                                                                                                                                                                                                                                                                                                                                                                                                                                                     | IRESSEF GENOMICS LAB                                        | IRESSEF GENOMICS LAB                                                                     | Professor Souleymane MBOUP, Dr Abdul Karim Sesay, Abdoulie Kante, Dr Abdou PADANE, Dr Papa Alassane DIAW, Dr Birahim Pierre NDIAYE, Dr Badara Cisse, Dr Aminata MBOUP, Dr Moustapha MBOW, Professor Ndéye Coumba Touré KANE |
| EPI_ISL_1035923, EPI_ISL_1035931, EPI_ISL_1035932, EPI_ISL_1035933, EPI_ISL_1035934, EPI_ISL_1035935, EPI_ISL_1035936, EPI_ISL_1035937, EPI_ISL_1035938, EPI_ISL_1035939, EPI_ISL_1035940, EPI_ISL_1035941, EPI_ISL_1035942, EPI_ISL_1035943, EPI_ISL_1035944, EPI_ISL_1035945, EPI_ISL_1035946, EPI_ISL_1035947, EPI_ISL_1035948, EPI_ISL_1035959                                                                                                                                                                                                                                                                                                                                                                                                                                                                                                                                                                                                                                                                                                                                                                                                                                                                                                                                                                                                                                                                                                                                                                                                                                                                                                                                                                                                                                                                                                                                                                                                                                                                                                                                                                                                                                                                                                                                                                                                                                                                                                                                                                                                                                                                                                                                                                                                                                                                                                                                                                                                                                                                                                                                                                                                                                                                                                                                                                                                                                                                                                                                                                                                                                                                                                                                                                                                                                                                                                                                                                                                                                                                                                                                                                                                                                                                                                                                                                                                                                                                                                                                                                                                                                                                                                                                                                                                                                                                                                                                                                                                                                                                                                                                                                                                                                                                                                                                                                                                                                                                                                                  | Outre Mer CH de Mayotte                                     | National Reference Center for Viruses of Respiratory Infections, Institut Pasteur, Paris | Marion Barbet, Sylvie Behillil, Méline Bizard, Angela Brisebarre, Camille Capel, Etienne Simon-Lorière, Vincent Enouf, Maud Vanpeene, Sylvie van der Werf, Combe Patrice                                                    |
| EPI_ISL_1039227, EPI_ISL_1039228, EPI_ISL_1039229                                                                                                                                                                                                                                                                                                                                                                                                                                                                                                                                                                                                                                                                                                                                                                                                                                                                                                                                                                                                                                                                                                                                                                                                                                                                                                                                                                                                                                                                                                                                                                                                                                                                                                                                                                                                                                                                                                                                                                                                                                                                                                                                                                                                                                                                                                                                                                                                                                                                                                                                                                                                                                                                                                                                                                                                                                                                                                                                                                                                                                                                                                                                                                                                                                                                                                                                                                                                                                                                                                                                                                                                                                                                                                                                                                                                                                                                                                                                                                                                                                                                                                                                                                                                                                                                                                                                                                                                                                                                                                                                                                                                                                                                                                                                                                                                                                                                                                                                                                                                                                                                                                                                                                                                                                                                                                                                                                                                                   | KEMRI-Wellcome Trust Research Programme/KEMRI-CGMRC-Kilifi  | KEMRI-Wellcome Trust Research Programme/KEMRI-CGMRC-Kilifi                               | Githinji et al                                                                                                                                                                                                              |
| EPI_ISL_1040644, EPI_ISL_1040645, EPI_ISL_1040646                                                                                                                                                                                                                                                                                                                                                                                                                                                                                                                                                                                                                                                                                                                                                                                                                                                                                                                                                                                                                                                                                                                                                                                                                                                                                                                                                                                                                                                                                                                                                                                                                                                                                                                                                                                                                                                                                                                                                                                                                                                                                                                                                                                                                                                                                                                                                                                                                                                                                                                                                                                                                                                                                                                                                                                                                                                                                                                                                                                                                                                                                                                                                                                                                                                                                                                                                                                                                                                                                                                                                                                                                                                                                                                                                                                                                                                                                                                                                                                                                                                                                                                                                                                                                                                                                                                                                                                                                                                                                                                                                                                                                                                                                                                                                                                                                                                                                                                                                                                                                                                                                                                                                                                                                                                                                                                                                                                                                   | Groote Schuur Hospital wc GSH                               | NHLS/UCT                                                                                 | Arash Iranzadeh, Deelan Doolabh, Lynn Tyers, Bruna Galvao, Innocent Mudau, Marvin Hsiao, Kruger Marais, Diana Hardie, Stephen Korsman, Carolyn Williamson                                                                   |
| EPI_ISL_1040647                                                                                                                                                                                                                                                                                                                                                                                                                                                                                                                                                                                                                                                                                                                                                                                                                                                                                                                                                                                                                                                                                                                                                                                                                                                                                                                                                                                                                                                                                                                                                                                                                                                                                                                                                                                                                                                                                                                                                                                                                                                                                                                                                                                                                                                                                                                                                                                                                                                                                                                                                                                                                                                                                                                                                                                                                                                                                                                                                                                                                                                                                                                                                                                                                                                                                                                                                                                                                                                                                                                                                                                                                                                                                                                                                                                                                                                                                                                                                                                                                                                                                                                                                                                                                                                                                                                                                                                                                                                                                                                                                                                                                                                                                                                                                                                                                                                                                                                                                                                                                                                                                                                                                                                                                                                                                                                                                                                                                                                     | Swellendam PHC                                              | NHLS/UCT                                                                                 | Arash Iranzadeh, Deelan Doolabh, Lynn Tyers, Bruna Galvao, Innocent Mudau, Marvin Hsiao, Kruger Marais, Diana Hardie, Stephen Korsman, Carolyn Williamson                                                                   |
| EPI_ISL_1040648, EPI_ISL_1040649, EPI_ISL_1040650, EPI_ISL_1040651, EPI_ISL_1040652, EPI_ISL_1040653, EPI_ISL_1040654, EPI_ISL_1040655                                                                                                                                                                                                                                                                                                                                                                                                                                                                                                                                                                                                                                                                                                                                                                                                                                                                                                                                                                                                                                                                                                                                                                                                                                                                                                                                                                                                                                                                                                                                                                                                                                                                                                                                                                                                                                                                                                                                                                                                                                                                                                                                                                                                                                                                                                                                                                                                                                                                                                                                                                                                                                                                                                                                                                                                                                                                                                                                                                                                                                                                                                                                                                                                                                                                                                                                                                                                                                                                                                                                                                                                                                                                                                                                                                                                                                                                                                                                                                                                                                                                                                                                                                                                                                                                                                                                                                                                                                                                                                                                                                                                                                                                                                                                                                                                                                                                                                                                                                                                                                                                                                                                                                                                                                                                                                                              | Groote Schuur Hospital wc GSH                               | NHLS/UCT                                                                                 | Arash Iranzadeh, Deelan Doolabh, Lynn Tyers, Bruna Galvao, Innocent Mudau, Marvin Hsiao, Kruger Marais, Diana Hardie, Stephen Korsman, Carolyn Williamson                                                                   |
| EPI_ISL_1040656, EPI_ISL_1040657, EPI_ISL_1040658, EPI_ISL_1040659, EPI_ISL_1040660, EPI_ISL_1040661                                                                                                                                                                                                                                                                                                                                                                                                                                                                                                                                                                                                                                                                                                                                                                                                                                                                                                                                                                                                                                                                                                                                                                                                                                                                                                                                                                                                                                                                                                                                                                                                                                                                                                                                                                                                                                                                                                                                                                                                                                                                                                                                                                                                                                                                                                                                                                                                                                                                                                                                                                                                                                                                                                                                                                                                                                                                                                                                                                                                                                                                                                                                                                                                                                                                                                                                                                                                                                                                                                                                                                                                                                                                                                                                                                                                                                                                                                                                                                                                                                                                                                                                                                                                                                                                                                                                                                                                                                                                                                                                                                                                                                                                                                                                                                                                                                                                                                                                                                                                                                                                                                                                                                                                                                                                                                                                                                | Pacaltsdorp Clinic wc PAC                                   | NHLS/UCT                                                                                 | Arash Iranzadeh, Deelan Doolabh, Lynn Tyers, Bruna Galvao, Innocent Mudau, Marvin Hsiao, Kruger Marais, Diana Hardie, Stephen Korsman, Carolyn Williamson                                                                   |
| EPI_ISL_1040656, EPI_ISL_1040657, EPI_ISL_1040658, EPI_ISL_1040659, EPI_ISL_1040660, EPI_ISL_1040661                                                                                                                                                                                                                                                                                                                                                                                                                                                                                                                                                                                                                                                                                                                                                                                                                                                                                                                                                                                                                                                                                                                                                                                                                                                                                                                                                                                                                                                                                                                                                                                                                                                                                                                                                                                                                                                                                                                                                                                                                                                                                                                                                                                                                                                                                                                                                                                                                                                                                                                                                                                                                                                                                                                                                                                                                                                                                                                                                                                                                                                                                                                                                                                                                                                                                                                                                                                                                                                                                                                                                                                                                                                                                                                                                                                                                                                                                                                                                                                                                                                                                                                                                                                                                                                                                                                                                                                                                                                                                                                                                                                                                                                                                                                                                                                                                                                                                                                                                                                                                                                                                                                                                                                                                                                                                                                                                                | Groote Schuur Hospital wc GSH                               | NHLS/UCT                                                                                 | Arash Iranzadeh, Deelan Doolabh, Lynn Tyers, Bruna Galvao, Innocent Mudau, Marvin Hsiao, Kruger Marais, Diana Hardie, Stephen Korsman, Carolyn Williamson                                                                   |
| EPI_ISL_1040662                                                                                                                                                                                                                                                                                                                                                                                                                                                                                                                                                                                                                                                                                                                                                                                                                                                                                                                                                                                                                                                                                                                                                                                                                                                                                                                                                                                                                                                                                                                                                                                                                                                                                                                                                                                                                                                                                                                                                                                                                                                                                                                                                                                                                                                                                                                                                                                                                                                                                                                                                                                                                                                                                                                                                                                                                                                                                                                                                                                                                                                                                                                                                                                                                                                                                                                                                                                                                                                                                                                                                                                                                                                                                                                                                                                                                                                                                                                                                                                                                                                                                                                                                                                                                                                                                                                                                                                                                                                                                                                                                                                                                                                                                                                                                                                                                                                                                                                                                                                                                                                                                                                                                                                                                                                                                                                                                                                                                                                     | Heideveld Emergency Centre                                  | NHLS/UCT                                                                                 | Arash Iranzadeh, Deelan Doolabh, Lynn Tyers, Bruna Galvao, Innocent Mudau, Marvin Hsiao, Kruger Marais, Diana Hardie, Stephen Korsman, Carolyn Williamson                                                                   |
| EPI_ISL_1040663                                                                                                                                                                                                                                                                                                                                                                                                                                                                                                                                                                                                                                                                                                                                                                                                                                                                                                                                                                                                                                                                                                                                                                                                                                                                                                                                                                                                                                                                                                                                                                                                                                                                                                                                                                                                                                                                                                                                                                                                                                                                                                                                                                                                                                                                                                                                                                                                                                                                                                                                                                                                                                                                                                                                                                                                                                                                                                                                                                                                                                                                                                                                                                                                                                                                                                                                                                                                                                                                                                                                                                                                                                                                                                                                                                                                                                                                                                                                                                                                                                                                                                                                                                                                                                                                                                                                                                                                                                                                                                                                                                                                                                                                                                                                                                                                                                                                                                                                                                                                                                                                                                                                                                                                                                                                                                                                                                                                                                                     | Groote Schuur Hospital wc GSH                               | NHLS/UCT                                                                                 | Arash Iranzadeh, Deelan Doolabh, Lynn Tyers, Bruna Galvao, Innocent Mudau, Marvin Hsiao, Kruger Marais, Diana Hardie, Stephen Korsman, Carolyn Williamson                                                                   |
| EPI_ISL_1040916                                                                                                                                                                                                                                                                                                                                                                                                                                                                                                                                                                                                                                                                                                                                                                                                                                                                                                                                                                                                                                                                                                                                                                                                                                                                                                                                                                                                                                                                                                                                                                                                                                                                                                                                                                                                                                                                                                                                                                                                                                                                                                                                                                                                                                                                                                                                                                                                                                                                                                                                                                                                                                                                                                                                                                                                                                                                                                                                                                                                                                                                                                                                                                                                                                                                                                                                                                                                                                                                                                                                                                                                                                                                                                                                                                                                                                                                                                                                                                                                                                                                                                                                                                                                                                                                                                                                                                                                                                                                                                                                                                                                                                                                                                                                                                                                                                                                                                                                                                                                                                                                                                                                                                                                                                                                                                                                                                                                                                                     | Cancer Biology Department, National Cancer Institute        | Cancer Biology Department, National Cancer Institute                                     | Zekri,A.N., Sedawy,M.G., Ahmed,O.S., Hafez,M.M., Soliman,H.K., Bahnassy,A.A., Elhosieni,F.W., Gad,A.E., Hamdy,M.S., Soliman,M.S., Soliman,L. and Abouelhoda,M.                                                              |
| EPI_ISL_1048433, EPI_ISL_1048434, EPI_ISL_1048435, EPI_ISL_1048436, EPI_ISL_1048437, EPI_ISL_1048438, EPI_ISL_1048439, EPI_ISL_1048440, EPI_ISL_1048441, EPI_ISL_1048442, EPI_ISL_1048443, EPI_ISL_1048444, EPI_ISL_1048445, EPI_ISL_1048446, EPI_ISL_1048447, EPI_ISL_1048448, EPI_ISL_1048449, EPI_ISL_1048450, EPI_ISL_1048451, EPI_ISL_1048452, EPI_ISL_1048453, EPI_ISL_1048454, EPI_ISL_1048455, EPI_ISL_1048456, EPI_ISL_1048457, EPI_ISL_1048458, EPI_ISL_1048459, EPI_ISL_1048460, EPI_ISL_1048461                                                                                                                                                                                                                                                                                                                                                                                                                                                                                                                                                                                                                                                                                                                                                                                                                                                                                                                                                                                                                                                                                                                                                                                                                                                                                                                                                                                                                                                                                                                                                                                                                                                                                                                                                                                                                                                                                                                                                                                                                                                                                                                                                                                                                                                                                                                                                                                                                                                                                                                                                                                                                                                                                                                                                                                                                                                                                                                                                                                                                                                                                                                                                                                                                                                                                                                                                                                                                                                                                                                                                                                                                                                                                                                                                                                                                                                                                                                                                                                                                                                                                                                                                                                                                                                                                                                                                                                                                                                                                                                                                                                                                                                                                                                                                                                                                                                                                                                                                         | National Health Laboratory Service, South Africa            | KRISP, KZn Research Innovation and Sequencing Platform                                   | Laguda-Akingba O, Giandhari J, Pillay S, Lessells R, Mdlalose K, York D, Khan S, Emmanuel SJ, Tegally H, Wilkinson E, de Oliveira T                                                                                         |
| EPI_ISL_1048462, EPI_ISL_1048463, EPI_ISL_1048464, EPI_ISL_1048465, EPI_ISL_1048466, EPI_ISL_1048467, EPI_ISL_1048468, EPI_ISL_1048469, EPI_ISL_1048470, EPI_ISL_1048471, EPI_ISL_1048472, EPI_ISL_1048473, EPI_ISL_1048474, EPI_ISL_1048475, EPI_ISL_1048476, EPI_ISL_1048477, EPI_ISL_1048478, EPI_ISL_1048479, EPI_ISL_1048480, EPI_ISL_1048481, EPI_ISL_1048482, EPI_ISL_1048483, EPI_ISL_1048484, EPI_ISL_1048485, EPI_ISL_1048486, EPI_ISL_1048487, EPI_ISL_1048488, EPI_ISL_1048489, EPI_ISL_1048490, EPI_ISL_1048491, EPI_ISL_1048492, EPI_ISL_1048493, EPI_ISL_1048494, EPI_ISL_1048495, EPI_ISL_1048496, EPI_ISL_1048497, EPI_ISL_1048498, EPI_ISL_1048499, EPI_ISL_1048500, EPI_ISL_1048501, EPI_ISL_1048502, EPI_ISL_1048503, EPI_ISL_1048504, EPI_ISL_1048505, EPI_ISL_1048506, EPI_ISL_1048507, EPI_ISL_1048508, EPI_ISL_1048509, EPI_ISL_1048510, EPI_ISL_1048511, EPI_ISL_1048512, EPI_ISL_1048513, EPI_ISL_1048514, EPI_ISL_1048515, EPI_ISL_1048516, EPI_ISL_1048517, EPI_ISL_1048518, EPI_ISL_1048519, EPI_ISL_1048520, EPI_ISL_1048521, EPI_ISL_1048522, EPI_ISL_1048523, EPI_ISL_1048524, EPI_ISL_1048525, EPI_ISL_1048526, EPI_ISL_1048527, EPI_ISL_1048528, EPI_ISL_1048529, EPI_ISL_1048530, EPI_ISL_1048531, EPI_ISL_1048532, EPI_ISL_1048533, EPI_ISL_1048534, EPI_ISL_1048535, EPI_ISL_1048536, EPI_ISL_1048537, EPI_ISL_1048538, EPI_ISL_1048539, EPI_ISL_1048540, EPI_ISL_1048541, EPI_ISL_1048542, EPI_ISL_1048543, EPI_ISL_1048544, EPI_ISL_1048545, EPI_ISL_1048546, EPI_ISL_1048547, EPI_ISL_1048548, EPI_ISL_1048549, EPI_ISL_1048550, EPI_ISL_1048551, EPI_ISL_1048552, EPI_ISL_1048553, EPI_ISL_1048554, EPI_ISL_1048555, EPI_ISL_1048556, EPI_ISL_1048557, EPI_ISL_1048558, EPI_ISL_1048559, EPI_ISL_1048560, EPI_ISL_1048561, EPI_ISL_1048562, EPI_ISL_1048563, EPI_ISL_1048564, EPI_ISL_1048565, EPI_ISL_1048566, EPI_ISL_1048567, EPI_ISL_1048568                                                                                                                                                                                                                                                                                                                                                                                                                                                                                                                                                                                                                                                                                                                                                                                                                                                                                                                                                                                                                                                                                                                                                                                                                                                                                                                                                                                                                                                                                                                                                                                                                                                                                                                                                                                                                                                                                                                                                                                                                                                                                                                                                                                                                                                                                                                                                                                                                                                                                                                                                                                                                                                                                                                                                                                                                                                                                                                                                                                                                                                                                                                                                                                                                                                                                                                                                                                                                                                                                                                                                                           | National Health Laboratory Service, South Africa            | KRISP, KZn Research Innovation and Sequencing Platform                                   | Giandhari J, Pillay S, Lessells R, Mdlalose K, York D, Khan S, Emmanuel SJ, Tegally H, Wilkinson E, de Oliveira T                                                                                                           |

|                                                                                                                                                                                                                                                                                                                                                                                                                                                                                                                                                                                                                                                                                                                                                                                                                                                                                                                                                                                                                                                                                                                                                                                                                                                                                                                                                                                                                                                  |                                                                                                           |                                                                                                  |                                                                                                                                                                                                                |
|--------------------------------------------------------------------------------------------------------------------------------------------------------------------------------------------------------------------------------------------------------------------------------------------------------------------------------------------------------------------------------------------------------------------------------------------------------------------------------------------------------------------------------------------------------------------------------------------------------------------------------------------------------------------------------------------------------------------------------------------------------------------------------------------------------------------------------------------------------------------------------------------------------------------------------------------------------------------------------------------------------------------------------------------------------------------------------------------------------------------------------------------------------------------------------------------------------------------------------------------------------------------------------------------------------------------------------------------------------------------------------------------------------------------------------------------------|-----------------------------------------------------------------------------------------------------------|--------------------------------------------------------------------------------------------------|----------------------------------------------------------------------------------------------------------------------------------------------------------------------------------------------------------------|
| EPI_ISL_1064152                                                                                                                                                                                                                                                                                                                                                                                                                                                                                                                                                                                                                                                                                                                                                                                                                                                                                                                                                                                                                                                                                                                                                                                                                                                                                                                                                                                                                                  | Rwanda National Reference Laboratory                                                                      | Rwanda National Reference Laboratory                                                             | Enatha Mukantwari,Umuringa Jeanne d'Arc                                                                                                                                                                        |
| EPI_ISL_1064153                                                                                                                                                                                                                                                                                                                                                                                                                                                                                                                                                                                                                                                                                                                                                                                                                                                                                                                                                                                                                                                                                                                                                                                                                                                                                                                                                                                                                                  | Rwanda National Reference Laboratory                                                                      | Rwanda National Reference Laboratory                                                             | ENatha Mukantwari,Umuringa Jeanne d'Arc                                                                                                                                                                        |
| EPI_ISL_1064154, EPI_ISL_1064163                                                                                                                                                                                                                                                                                                                                                                                                                                                                                                                                                                                                                                                                                                                                                                                                                                                                                                                                                                                                                                                                                                                                                                                                                                                                                                                                                                                                                 | Rwanda National Reference Laboratory                                                                      | Rwanda National Reference Laboratory                                                             | Enatha Mukantwari,Umuringa Jeanne d'Arc                                                                                                                                                                        |
| EPI_ISL_1064164                                                                                                                                                                                                                                                                                                                                                                                                                                                                                                                                                                                                                                                                                                                                                                                                                                                                                                                                                                                                                                                                                                                                                                                                                                                                                                                                                                                                                                  | Rwanda National Reference Laboratory                                                                      | Rwanda National Reference Laboratory                                                             | ENatha Mukantwari,Umuringa Jeanne d'Arc                                                                                                                                                                        |
| EPI_ISL_1064165, EPI_ISL_1064166                                                                                                                                                                                                                                                                                                                                                                                                                                                                                                                                                                                                                                                                                                                                                                                                                                                                                                                                                                                                                                                                                                                                                                                                                                                                                                                                                                                                                 | Rwanda National Reference Laboratory                                                                      | Rwanda National Reference Laboratory                                                             | Enatha Mukantwari,Umuringa Jeanne d'Arc                                                                                                                                                                        |
| EPI_ISL_1064168, EPI_ISL_1064170                                                                                                                                                                                                                                                                                                                                                                                                                                                                                                                                                                                                                                                                                                                                                                                                                                                                                                                                                                                                                                                                                                                                                                                                                                                                                                                                                                                                                 | Rwanda National Reference Laboratory                                                                      | Rwanda National Reference Laboratory                                                             | Enatha Mukantwari,Umuringa Jeanne d'Arc                                                                                                                                                                        |
| EPI_ISL_1064171                                                                                                                                                                                                                                                                                                                                                                                                                                                                                                                                                                                                                                                                                                                                                                                                                                                                                                                                                                                                                                                                                                                                                                                                                                                                                                                                                                                                                                  | Rwanda National Reference Laboratory                                                                      | Rwanda National Reference Laboratory                                                             | Enatha Mukantwari,Umuringa Jeanne d'Arc                                                                                                                                                                        |
| EPI_ISL_1073037                                                                                                                                                                                                                                                                                                                                                                                                                                                                                                                                                                                                                                                                                                                                                                                                                                                                                                                                                                                                                                                                                                                                                                                                                                                                                                                                                                                                                                  | Kasane Primary Hospital Laboratory                                                                        | Botswana Harvard HIV Reference Laboratory                                                        | Sikhulile Moyo, Wonderful T. Choga, Dorcas Maruapula, Botshelo Radibe, Boitumelo Zuze, David Lawrence, Roger Shapiro, Shahin Lockman, Mosepele Mosepele, Joseph Makhema, Simani Gaseitsiwe                     |
| EPI_ISL_1073135                                                                                                                                                                                                                                                                                                                                                                                                                                                                                                                                                                                                                                                                                                                                                                                                                                                                                                                                                                                                                                                                                                                                                                                                                                                                                                                                                                                                                                  | National Reference Laboratory, Nigeria Centre for Disease Control.                                        | National Reference Laboratory, Nigeria Centre for Disease Control, Gaduwa, Abuja, Nigeria        | Dr Ndodo Nnaemeka, Olusola Anuoluwapo Akanbi, Chimaobi Chukwu, Dr Omoare Adesuyi, Esebanmen Grace, Anthony Ahumibe, Naidoo Dhamari, Nwando Mba, Dr Chikwe Ihekweazu                                            |
| EPI_ISL_1073137                                                                                                                                                                                                                                                                                                                                                                                                                                                                                                                                                                                                                                                                                                                                                                                                                                                                                                                                                                                                                                                                                                                                                                                                                                                                                                                                                                                                                                  | Nigeria Centre For Disease Control                                                                        | National reference Laboratory, NCDC, Gaduwa, Abuja                                               | Dr Ndodo Nnaemeka, Olusola Anuoluwapo Akanbi, Chimaobi Chukwu, Dr Omoare Adesuyi, Esebanmen Grace, Anthony Ahumibe, Naidoo Dhamari, Chinwe Ochu, Nwando Mba, Dr Chikwe Ihekweazu                               |
| EPI_ISL_1073139                                                                                                                                                                                                                                                                                                                                                                                                                                                                                                                                                                                                                                                                                                                                                                                                                                                                                                                                                                                                                                                                                                                                                                                                                                                                                                                                                                                                                                  | Nigeria Centre For Disease Control                                                                        | National reference Laboratory, NCDC, Gaduwa, Abuja                                               | Dr Ndodo Nnaemeka, Olusola Anuoluwapo Akanbi, Chimaobi Chukwu, Dr Omoare Adesuyi, Grace Esebanmen, Anthony Ahumibe, Naidoo Dhamari, Nwando Mba, Dr Chikwe Ihekweazu                                            |
| EPI_ISL_1073638                                                                                                                                                                                                                                                                                                                                                                                                                                                                                                                                                                                                                                                                                                                                                                                                                                                                                                                                                                                                                                                                                                                                                                                                                                                                                                                                                                                                                                  | Nigeria Centre For Disease Control                                                                        | National reference Laboratory, NCDC, Gaduwa, Abuja                                               | Dr Ndodo Nnaemeka, Olusola Anuoluwapo Akanbi, Chimaobi Chukwu, Dr Omoare Adesuyi, Grace Esebanmen, Anthony Ahumibe, Naidoo Dhamari, Catherine Okoi, Nwando Mba, Dr Chikwe Ihekweazu                            |
| EPI_ISL_1073639                                                                                                                                                                                                                                                                                                                                                                                                                                                                                                                                                                                                                                                                                                                                                                                                                                                                                                                                                                                                                                                                                                                                                                                                                                                                                                                                                                                                                                  | Nigeria Centre For Disease Control                                                                        | National reference Laboratory, NCDC, Gaduwa, Abuja                                               | Dr Ndodo Nnaemeka, Olusola Anuoluwapo Akanbi, Chimaobi Chukwu, Dr Omoare Adesuyi, Grace Esebanmen, Anthony Ahumibe, Naidoo Dhamari, Catherine Okoi, Nwando Mba, Dr Chikwe Ihekweazu                            |
| EPI_ISL_1073640                                                                                                                                                                                                                                                                                                                                                                                                                                                                                                                                                                                                                                                                                                                                                                                                                                                                                                                                                                                                                                                                                                                                                                                                                                                                                                                                                                                                                                  | Nigeria Centre For Disease Control                                                                        | National reference Laboratory, NCDC, Gaduwa, Abuja                                               | Dr Ndodo Nnaemeka, Olusola Anuoluwapo Akanbi, Chimaobi Chukwu, Dr Omoare Adesuyi, Grace Esebanmen, Celestina Obiekea, Anthony Ahumibe, Catherine Okoi, Naidoo Dhamari, Nwando Mba, Dr Chikwe Ihekweazu         |
| EPI_ISL_1074301                                                                                                                                                                                                                                                                                                                                                                                                                                                                                                                                                                                                                                                                                                                                                                                                                                                                                                                                                                                                                                                                                                                                                                                                                                                                                                                                                                                                                                  | Nyangabwe Hospital HIV Reference Laboratory                                                               | Botswana Harvard HIV Reference Laboratory,                                                       | Sikhulile Moyo, Wonderful T. Choga, Dorcas Maruapula, Botshelo Radibe, Boitumelo Zuze, David Lawrence, Roger Shapiro, Shahin Lockman, Mosepele Mosepele, Joseph Makhema, Simani Gaseitsiwe                     |
| EPI_ISL_1074743                                                                                                                                                                                                                                                                                                                                                                                                                                                                                                                                                                                                                                                                                                                                                                                                                                                                                                                                                                                                                                                                                                                                                                                                                                                                                                                                                                                                                                  | Nyangabwe Hospital HIV Reference Laboratory                                                               | Botswana Harvard HIV Reference Laboratory                                                        | Sikhulile Moyo, Wonderful T. Choga, Dorcas Maruapula, Botshelo Radibe, Boitumelo Zuze, David Lawrence, Roger Shapiro, Shahin Lockman, Mosepele Mosepele, Joseph Makhema, Simani Gaseitsiwe                     |
| EPI_ISL_1075350                                                                                                                                                                                                                                                                                                                                                                                                                                                                                                                                                                                                                                                                                                                                                                                                                                                                                                                                                                                                                                                                                                                                                                                                                                                                                                                                                                                                                                  | Palapye Primary Hospital Laboratory                                                                       | Botswana Harvard HIV Reference Laboratory                                                        | Sikhulile Moyo, Dorcas Maruapula, Wonderful T. Choga, Botshelo Radibe, Boitumelo Zuze, David Lawrence, Roger Shapiro, Shahin Lockman, Mosepele Mosepele, Joseph Makhema, Simani Gaseitsiwe                     |
| EPI_ISL_1075644                                                                                                                                                                                                                                                                                                                                                                                                                                                                                                                                                                                                                                                                                                                                                                                                                                                                                                                                                                                                                                                                                                                                                                                                                                                                                                                                                                                                                                  | Kasane Primary Hospital Laboratory                                                                        | Botswana Harvard HIV Reference Laboratory                                                        | Sikhulile Moyo, Wonderful T. Choga, Dorcas Maruapula, Botshelo Radibe, Boitumelo Zuze, Legodile Kooepile, David Lawrence, Roger Shapiro, Shahin Lockman, Mosepele Mosepele, Joseph, Makhema, Simani Gaseitsiwe |
| EPI_ISL_1076023                                                                                                                                                                                                                                                                                                                                                                                                                                                                                                                                                                                                                                                                                                                                                                                                                                                                                                                                                                                                                                                                                                                                                                                                                                                                                                                                                                                                                                  | Nyangabwe Hospital HIV Reference Laboratory                                                               | Botswana Harvard HIV Reference Laboratory                                                        | Sikhulile Moyo, Wonderful T. Choga, Dorcas Maruapula, Botshelo Radibe, Boitumelo Zuze, David Lawrence, Roger Shapiro, Shahin Lockman, Mosepele Mosepele, Joseph Makhema, Simani Gaseitsiwe                     |
| EPI_ISL_1076306                                                                                                                                                                                                                                                                                                                                                                                                                                                                                                                                                                                                                                                                                                                                                                                                                                                                                                                                                                                                                                                                                                                                                                                                                                                                                                                                                                                                                                  | Nyangabwe Hospital HIV Reference Laboratory                                                               | Botswana Harvard HIV Reference Laboratory                                                        | Sikhulile Moyo, Wonderful T. Choga, Dorcas Maruapula, Botshelo Radibe, Boitumelo Zuze, Legodile Kooepile, David Lawrence, Roger Shapiro, Shahin Lockman, Mosepele Mosepele, Joseph, Makhema, Simani Gaseitsiwe |
| EPI_ISL_1082297                                                                                                                                                                                                                                                                                                                                                                                                                                                                                                                                                                                                                                                                                                                                                                                                                                                                                                                                                                                                                                                                                                                                                                                                                                                                                                                                                                                                                                  | National Reference Laboratory, Nigeria Centre for Disease Control.                                        | National Reference Laboratory, Nigeria Centre for Disease Control, Gaduwa, Abuja, Nigeria        | Dr Ndodo Nnaemeka, Olusola Anuoluwapo Akanbi, Chimaobi Chukwu, Dr Omoare Adesuyi, Grace Esebanmen, Anthony Ahumibe, Catherine Okoi, Naidoo Dhamari, Nwando Mba, Dr Chikwe Ihekweazu                            |
| EPI_ISL_1085952, EPI_ISL_1085953, EPI_ISL_1085954, EPI_ISL_1085955, EPI_ISL_1085956, EPI_ISL_1085957, EPI_ISL_1085958, EPI_ISL_1085959, EPI_ISL_1085960, EPI_ISL_1085961, EPI_ISL_1085962, EPI_ISL_1085963, EPI_ISL_1085964, EPI_ISL_1085965, EPI_ISL_1085966, EPI_ISL_1085967, EPI_ISL_1085968, EPI_ISL_1085969, EPI_ISL_1085970, EPI_ISL_1085971, EPI_ISL_1085972, EPI_ISL_1085973, EPI_ISL_1085974, EPI_ISL_1085975, EPI_ISL_1085976, EPI_ISL_1085977, EPI_ISL_1085978, EPI_ISL_1085979, EPI_ISL_1085980, EPI_ISL_1085981, EPI_ISL_1085982, EPI_ISL_1085983, EPI_ISL_1085984, EPI_ISL_1085985, EPI_ISL_1085986, EPI_ISL_1085987, EPI_ISL_1085988, EPI_ISL_1085989, EPI_ISL_1085990, EPI_ISL_1085991, EPI_ISL_1085992, EPI_ISL_1085993, EPI_ISL_1085994, EPI_ISL_1085995, EPI_ISL_1085996, EPI_ISL_1085997, EPI_ISL_1085998, EPI_ISL_1085999, EPI_ISL_1086000, EPI_ISL_1086001, EPI_ISL_1086002, EPI_ISL_1086003, EPI_ISL_1086004, EPI_ISL_1086005, EPI_ISL_1086006, EPI_ISL_1086007, EPI_ISL_1086008, EPI_ISL_1086009, EPI_ISL_1086010, EPI_ISL_1086011, EPI_ISL_1086012, EPI_ISL_1086013, EPI_ISL_1086014, EPI_ISL_1086015, EPI_ISL_1086016, EPI_ISL_1086017, EPI_ISL_1086018, EPI_ISL_1086019, EPI_ISL_1086020, EPI_ISL_1086021, EPI_ISL_1086022, EPI_ISL_1086023, EPI_ISL_1086024, EPI_ISL_1086025, EPI_ISL_1086026, EPI_ISL_1086027, EPI_ISL_1086028, EPI_ISL_1086029, EPI_ISL_1086030, EPI_ISL_1086031, EPI_ISL_1086032, EPI_ISL_1086033 | Netcare/AMPATH                                                                                            | KRISP, KZN Research Innovation and Sequencing Platform                                           | Giandhari J, Pillay S, Maslo C, Sitharam L, Lessells R, Mdlalose K, York D, Khan S, Emmanuel SJ, Tegally H, Wilkinson E, de Oliveira T                                                                         |
| EPI_ISL_1093427                                                                                                                                                                                                                                                                                                                                                                                                                                                                                                                                                                                                                                                                                                                                                                                                                                                                                                                                                                                                                                                                                                                                                                                                                                                                                                                                                                                                                                  | Influenza and respiratory viruses lab. Pasteur Institute in Algeria                                       | Human virology Department                                                                        | A.Hachid, F.A.Khardine, M.A. Beloufa, F.Derrar                                                                                                                                                                 |
| EPI_ISL_1093428                                                                                                                                                                                                                                                                                                                                                                                                                                                                                                                                                                                                                                                                                                                                                                                                                                                                                                                                                                                                                                                                                                                                                                                                                                                                                                                                                                                                                                  | Influenza and respiratory viruses. Pasteur Institute in Algeria                                           | Human virology deptment                                                                          | A.Hachid, F.A.Khardine, F.Derrar                                                                                                                                                                               |
| EPI_ISL_1093429                                                                                                                                                                                                                                                                                                                                                                                                                                                                                                                                                                                                                                                                                                                                                                                                                                                                                                                                                                                                                                                                                                                                                                                                                                                                                                                                                                                                                                  | Influenza and respiratory viruses Lab. Pasteur Institute in Algeria                                       | Human Virology Department                                                                        | A.Hachid, F.A.Khardine, M.A.Beloufa, F.Derrar                                                                                                                                                                  |
| EPI_ISL_1093430                                                                                                                                                                                                                                                                                                                                                                                                                                                                                                                                                                                                                                                                                                                                                                                                                                                                                                                                                                                                                                                                                                                                                                                                                                                                                                                                                                                                                                  | Influenza and respiratory viurses Lab. Pasteur Institute in Algeria                                       | Human Virology Department                                                                        | A.Hachid, F.A.Khardine, M.A.Beloufa, F.Derrar                                                                                                                                                                  |
| EPI_ISL_1093431, EPI_ISL_1093433, EPI_ISL_1093434, EPI_ISL_1093437, EPI_ISL_1093438, EPI_ISL_1093439, EPI_ISL_1093440, EPI_ISL_1093441, EPI_ISL_1093442, EPI_ISL_1093443, EPI_ISL_1093444, EPI_ISL_1093445, EPI_ISL_1093446, EPI_ISL_1093447, EPI_ISL_1093448, EPI_ISL_1093449, EPI_ISL_1093450, EPI_ISL_1093451, EPI_ISL_1093452, EPI_ISL_1093453, EPI_ISL_1093454, EPI_ISL_1093455, EPI_ISL_1093456, EPI_ISL_1093457, EPI_ISL_1093458, EPI_ISL_1093459, EPI_ISL_1093460, EPI_ISL_1093462, EPI_ISL_1093463, EPI_ISL_1093464, EPI_ISL_1093466, EPI_ISL_1093469, EPI_ISL_1093470, EPI_ISL_1093471, EPI_ISL_1093472, EPI_ISL_1093473, EPI_ISL_1093475                                                                                                                                                                                                                                                                                                                                                                                                                                                                                                                                                                                                                                                                                                                                                                                              | Nigerian Centre for Disease Control (NCDC)                                                                | African Centre of Excellence for Genomics of Infectious Diseases (ACEGID), Redeemer's University | Olawoye, I.B., et al                                                                                                                                                                                           |
| EPI_ISL_1103569                                                                                                                                                                                                                                                                                                                                                                                                                                                                                                                                                                                                                                                                                                                                                                                                                                                                                                                                                                                                                                                                                                                                                                                                                                                                                                                                                                                                                                  | Laboratoire central de Virologie, Centre hospitalo-universitaire Ibn Sina, Hôpital des spécialités, Rabat | Laboratoire de Biotechnologie                                                                    | Myriam Seffar, Hakima Kabbaj, Ghizlane EL Amin, Amal Zouaki, Mouna Ouadghiri, Tarik Aanniz, Abdelmunim Essabbar, Saaïd Amzazi, Lahcen Belyamani and Azeddine Ibrahim                                           |
| EPI_ISL_1103576                                                                                                                                                                                                                                                                                                                                                                                                                                                                                                                                                                                                                                                                                                                                                                                                                                                                                                                                                                                                                                                                                                                                                                                                                                                                                                                                                                                                                                  | Laboratoire central de Virologie                                                                          | Laboratoire de Biotechnologie                                                                    | Myriam Seffar, Hakima Kabbaj, Ghizlane EL Amin, Amal Zouaki, Mouna Ouadghiri, Tarik Aanniz, Abdelmunim Essabbar, Saaïd Amzazi, Lahcen Belyamani and Azeddine Ibrahim                                           |
| EPI_ISL_1103579                                                                                                                                                                                                                                                                                                                                                                                                                                                                                                                                                                                                                                                                                                                                                                                                                                                                                                                                                                                                                                                                                                                                                                                                                                                                                                                                                                                                                                  | Laboratoire central de Virologie, Centre hospitalo-universitaire Ibn Sina, Hôpital des spécialités        | Laboratoire de Biotechnologie                                                                    | Myriam Seffar, Hakima Kabbaj, Ghizlane EL Amin, Amal Zouaki, Mouna Ouadghiri, Tarik Aanniz, Abdelmunim Essabbar, Saaïd Amzazi, Lahcen Belyamani and Azeddine Ibrahim                                           |
| EPI_ISL_1103584                                                                                                                                                                                                                                                                                                                                                                                                                                                                                                                                                                                                                                                                                                                                                                                                                                                                                                                                                                                                                                                                                                                                                                                                                                                                                                                                                                                                                                  | Laboratoire central de Virologie, Centre hospitalo-universitaire Ibn Sina, Hôpital des spécialités        | Laboratoire de Biotechnologie                                                                    | Myriam Seffar, Hakima Kabbaj, Ghizlane EL Amin, Amal Zouaki, Mouna Ouadghiri, Tarik Aanniz, Abdelmunim Essabbar, Saaïd Amzazi, Lahcen Belyamani and Azeddine Ibrahim                                           |
| EPI_ISL_1105946                                                                                                                                                                                                                                                                                                                                                                                                                                                                                                                                                                                                                                                                                                                                                                                                                                                                                                                                                                                                                                                                                                                                                                                                                                                                                                                                                                                                                                  | Laboratoire central de Virologie, Centre hospitalo-universitaire Ibn Sina Hôpital des spécialités         | Laboratoire de Biotechnologie                                                                    | Myriam Seffar, Hakima Kabbaj, Ghizlane EL Amin, Amal Zouaki, Mouna Ouadghiri, Tarik Aanniz, Abdelmunim Essabbar, Saaïd Amzazi, Lahcen Belyamani and Azeddine Ibrahim                                           |
| EPI_ISL_1107189                                                                                                                                                                                                                                                                                                                                                                                                                                                                                                                                                                                                                                                                                                                                                                                                                                                                                                                                                                                                                                                                                                                                                                                                                                                                                                                                                                                                                                  | Laboratoire central de Virologie                                                                          | Laboratoire de Biotechnologie                                                                    | Hakima Kabbaj, Myriam Seffar, Ghizlane EL Amin, Amal Zouaki, Abdelmunim Essabbar, Tarik Aanniz, Mouna Ouadghiri, Saaïd Amzazi, Lahcen Belyamani and Azeddine Ibrahim                                           |
| EPI_ISL_1109622                                                                                                                                                                                                                                                                                                                                                                                                                                                                                                                                                                                                                                                                                                                                                                                                                                                                                                                                                                                                                                                                                                                                                                                                                                                                                                                                                                                                                                  | Laboratoire central de Virologie                                                                          | Laboratoire de Biotechnologie                                                                    | Hakima Kabbaj, Myriam Seffar, Ghizlane EL Amin, Amal Zouaki, Abdelmunim Essabbar, Tarik Aanniz, Mouna Ouadghiri, Saaïd Amzazi, Lahcen Belyamani and Azeddine Ibrahim                                           |
| EPI_ISL_1109623                                                                                                                                                                                                                                                                                                                                                                                                                                                                                                                                                                                                                                                                                                                                                                                                                                                                                                                                                                                                                                                                                                                                                                                                                                                                                                                                                                                                                                  | Laboratoire central de Virologie                                                                          | Laboratoire de Biotechnologie                                                                    | Hakima Kabbaj, Myriam Seffar, Ghizlane EL Amin, Amal Zouaki, Abdelmunim Essabbar, Tarik Aanniz, Mouna Ouadghiri, Saaïd Amzazi, Lahcen Belyamani and Azeddine Ibrahim                                           |

|                                                                                                                                                                                                                                                                                                                                                                                                                                                                                                                                                                                                                                                                                                                                                                                                                                                                                                                                                                                                                                                                                                                                                                                                                                                                                                                                                                                                                                                                                                                                                                                                                                                                                                                                                                                                                                                                                                                                                                                                                                                                                                                                                                                                                                                                                                                   |                                                                   |                                                                                                 |                                                                                                                                                                                                                                                                                                                                      |                                                                                                                                                                          |
|-------------------------------------------------------------------------------------------------------------------------------------------------------------------------------------------------------------------------------------------------------------------------------------------------------------------------------------------------------------------------------------------------------------------------------------------------------------------------------------------------------------------------------------------------------------------------------------------------------------------------------------------------------------------------------------------------------------------------------------------------------------------------------------------------------------------------------------------------------------------------------------------------------------------------------------------------------------------------------------------------------------------------------------------------------------------------------------------------------------------------------------------------------------------------------------------------------------------------------------------------------------------------------------------------------------------------------------------------------------------------------------------------------------------------------------------------------------------------------------------------------------------------------------------------------------------------------------------------------------------------------------------------------------------------------------------------------------------------------------------------------------------------------------------------------------------------------------------------------------------------------------------------------------------------------------------------------------------------------------------------------------------------------------------------------------------------------------------------------------------------------------------------------------------------------------------------------------------------------------------------------------------------------------------------------------------|-------------------------------------------------------------------|-------------------------------------------------------------------------------------------------|--------------------------------------------------------------------------------------------------------------------------------------------------------------------------------------------------------------------------------------------------------------------------------------------------------------------------------------|--------------------------------------------------------------------------------------------------------------------------------------------------------------------------|
| EPI_ISL_1116465, EPI_ISL_1116466                                                                                                                                                                                                                                                                                                                                                                                                                                                                                                                                                                                                                                                                                                                                                                                                                                                                                                                                                                                                                                                                                                                                                                                                                                                                                                                                                                                                                                                                                                                                                                                                                                                                                                                                                                                                                                                                                                                                                                                                                                                                                                                                                                                                                                                                                  | Laboratoire central de Virologie                                  | Laboratoire de Biotechnologie                                                                   | Ghizlane EL Amin, Hakima Kabbaj, Myriam Seffar, Amal Zouaki, Abdelmunim Essabbar, Tarik Anniz, Mouna Ouadghiri, Saaid Amzazi, Lahcen Belyamani and Azeddine Ibrahim                                                                                                                                                                  |                                                                                                                                                                          |
| EPI_ISL_1116469                                                                                                                                                                                                                                                                                                                                                                                                                                                                                                                                                                                                                                                                                                                                                                                                                                                                                                                                                                                                                                                                                                                                                                                                                                                                                                                                                                                                                                                                                                                                                                                                                                                                                                                                                                                                                                                                                                                                                                                                                                                                                                                                                                                                                                                                                                   | Laboratoire de Microbiologie- CHU Habib Bourguiba - Sfax          | Laboratoire des Procédés de Criblage Moléculaire et Cellulaire-Centre de Biotechnologie de Sfax | Souissi.A., Abid.N., Ben Ayed.I., Gargouri.S., Abdelmoulah.F., Elargoubi.A., Smeti.I., Bensaid.M., Stambouli.N., Kharat.N., Ajili.F., Fki-berrajah.L., Mhalla.S., Chtourou.A., Gaaloul.I., Nabli.A., Turki.M., Aouni.M., Hammami.A., Mastouri.M., Karray Hakim.H., Kamoun.S., Rebai.A. and Masmoudi.S.                               |                                                                                                                                                                          |
| EPI_ISL_1116470                                                                                                                                                                                                                                                                                                                                                                                                                                                                                                                                                                                                                                                                                                                                                                                                                                                                                                                                                                                                                                                                                                                                                                                                                                                                                                                                                                                                                                                                                                                                                                                                                                                                                                                                                                                                                                                                                                                                                                                                                                                                                                                                                                                                                                                                                                   | Laboratoire central de Virologie                                  | Laboratoire de Biotechnologie                                                                   | Hakima Kabbaj, Myriam Seffar, Ghizlane EL Amin, Amal Zouaki, Abdelmunim Essabbar, Tarik Anniz, Mouna Ouadghiri, Saaid Amzazi, Lahcen Belyamani and Azeddine Ibrahim                                                                                                                                                                  |                                                                                                                                                                          |
| EPI_ISL_1116555                                                                                                                                                                                                                                                                                                                                                                                                                                                                                                                                                                                                                                                                                                                                                                                                                                                                                                                                                                                                                                                                                                                                                                                                                                                                                                                                                                                                                                                                                                                                                                                                                                                                                                                                                                                                                                                                                                                                                                                                                                                                                                                                                                                                                                                                                                   | Laboratoire central de Virologie                                  | Laboratoire de Biotechnologie                                                                   | Ghizlane EL Amin, Myriam Seffar, Hakima Kabbaj, Amal Zouaki, Abdelmunim Essabbar, Tarik Anniz, Mouna Ouadghiri, Saaid Amzazi, Lahcen Belyamani and Azeddine Ibrahim                                                                                                                                                                  |                                                                                                                                                                          |
| EPI_ISL_1116592, EPI_ISL_1117289                                                                                                                                                                                                                                                                                                                                                                                                                                                                                                                                                                                                                                                                                                                                                                                                                                                                                                                                                                                                                                                                                                                                                                                                                                                                                                                                                                                                                                                                                                                                                                                                                                                                                                                                                                                                                                                                                                                                                                                                                                                                                                                                                                                                                                                                                  | Laboratoire central de Virologie                                  | Laboratoire de Biotechnologie                                                                   | Hakima Kabbaj, Myriam Seffar, Ghizlane EL Amin, Amal Zouaki, Abdelmunim Essabbar, Tarik Anniz, Mouna Ouadghiri, Saaid Amzazi, Lahcen Belyamani and Azeddine Ibrahim                                                                                                                                                                  |                                                                                                                                                                          |
| EPI_ISL_1118923                                                                                                                                                                                                                                                                                                                                                                                                                                                                                                                                                                                                                                                                                                                                                                                                                                                                                                                                                                                                                                                                                                                                                                                                                                                                                                                                                                                                                                                                                                                                                                                                                                                                                                                                                                                                                                                                                                                                                                                                                                                                                                                                                                                                                                                                                                   | Laboratoire de Microbiologie- CHU Habib Bourguiba - Sfax          | Laboratoire des Procédés de Criblage Moléculaire et Cellulaire-Centre de Biotechnologie de Sfax | Souissi.A., Abid.N., Ben Ayed.I., Gargouri.S., Abdelmoulah.F., Elargoubi.A., Smeti.I., Bensaid.M., Stambouli.N., Kharat.N., Ajili.F., Fki-berrajah.L., Mhalla.S., Chtourou.A., Gaaloul.I., Nabli.A., Turki.M., Aouni.M., Hammami.A., Mastouri.M., Karray Hakim.H., Kamoun.S., Rebai.A. and Masmoudi.S.                               |                                                                                                                                                                          |
| EPI_ISL_1120732                                                                                                                                                                                                                                                                                                                                                                                                                                                                                                                                                                                                                                                                                                                                                                                                                                                                                                                                                                                                                                                                                                                                                                                                                                                                                                                                                                                                                                                                                                                                                                                                                                                                                                                                                                                                                                                                                                                                                                                                                                                                                                                                                                                                                                                                                                   | Laboratoire central de Virologie                                  | Laboratoire de Biotechnologie                                                                   | Hakima Kabbaj, Myriam Seffar, Ghizlane EL Amin, Amal Zouaki, Abdelmunim Essabbar, Tarik Anniz, Mouna Ouadghiri, Saaid Amzazi, Lahcen Belyamani and Azeddine Ibrahim                                                                                                                                                                  |                                                                                                                                                                          |
| EPI_ISL_1132818, EPI_ISL_1132819, EPI_ISL_1132820, EPI_ISL_1132821, EPI_ISL_1132822, EPI_ISL_1132823, EPI_ISL_1132824, EPI_ISL_1132835, EPI_ISL_1132836, EPI_ISL_1132837, EPI_ISL_1132838, EPI_ISL_1132839, EPI_ISL_1132840, EPI_ISL_1132841, EPI_ISL_1132842, EPI_ISL_1132843, EPI_ISL_1132844                                                                                                                                                                                                                                                                                                                                                                                                                                                                                                                                                                                                                                                                                                                                                                                                                                                                                                                                                                                                                                                                                                                                                                                                                                                                                                                                                                                                                                                                                                                                                                                                                                                                                                                                                                                                                                                                                                                                                                                                                   | see above                                                         | Instituto Nacional de Saude (INS), Mozambique                                                   | KRISP, KZN Research Innovation and Sequencing Platform                                                                                                                                                                                                                                                                               |                                                                                                                                                                          |
| EPI_ISL_1137621                                                                                                                                                                                                                                                                                                                                                                                                                                                                                                                                                                                                                                                                                                                                                                                                                                                                                                                                                                                                                                                                                                                                                                                                                                                                                                                                                                                                                                                                                                                                                                                                                                                                                                                                                                                                                                                                                                                                                                                                                                                                                                                                                                                                                                                                                                   | Laboratoire central de Virologie                                  | Laboratoire de Biotechnologie                                                                   | Nalia Ismael, Nadia Siteo, Paulo Arnaldo, Nedio Mabunda, Giandhari J, Pillay S, Emmanuel S, Tegally H, Wilkinson E, de Oliveira T                                                                                                                                                                                                    |                                                                                                                                                                          |
| EPI_ISL_1138747                                                                                                                                                                                                                                                                                                                                                                                                                                                                                                                                                                                                                                                                                                                                                                                                                                                                                                                                                                                                                                                                                                                                                                                                                                                                                                                                                                                                                                                                                                                                                                                                                                                                                                                                                                                                                                                                                                                                                                                                                                                                                                                                                                                                                                                                                                   | Laboratoire de Microbiologie- CHU Habib Bourguiba - Sfax          | Laboratoire des Procédés de Criblage Moléculaire et Cellulaire-Centre de Biotechnologie de Sfax | Myriam Seffar, Hakima Kabbaj, Ghizlane EL Amin, Amal Zouaki, Abdelmunim Essabbar, Tarik Anniz, Mouna Ouadghiri, Saaid Amzazi, Lahcen Belyamani and Azeddine Ibrahim                                                                                                                                                                  |                                                                                                                                                                          |
| EPI_ISL_1159697                                                                                                                                                                                                                                                                                                                                                                                                                                                                                                                                                                                                                                                                                                                                                                                                                                                                                                                                                                                                                                                                                                                                                                                                                                                                                                                                                                                                                                                                                                                                                                                                                                                                                                                                                                                                                                                                                                                                                                                                                                                                                                                                                                                                                                                                                                   | Laboratoire central de Virologie                                  | Laboratoire de Biotechnologie                                                                   | Souissi.A., Abid.N., Ben Ayed.I., Gargouri.S., Abdelmoulah.F., Elargoubi.A., Smeti.I., Bensaid.M., Stambouli.N., Kharat.N., Ajili.F., Fki-berrajah.L., Mhalla.S., Chtourou.A., Gaaloul.I., Nabli.A., Turki.M., Aouni.M., Hammami.A., Mastouri.M., Karray Hakim.H., Kamoun.S., Rebai.A. and Masmoudi.S.                               |                                                                                                                                                                          |
| EPI_ISL_1159698, EPI_ISL_1159699, EPI_ISL_1159700                                                                                                                                                                                                                                                                                                                                                                                                                                                                                                                                                                                                                                                                                                                                                                                                                                                                                                                                                                                                                                                                                                                                                                                                                                                                                                                                                                                                                                                                                                                                                                                                                                                                                                                                                                                                                                                                                                                                                                                                                                                                                                                                                                                                                                                                 | Laboratoire central de Virologie                                  | Laboratoire de Biotechnologie                                                                   | Tarik Anniz, Mouna Ouadghiri, Abdelmunim Essabbar, Ghizlane EL Amin, Amal Zouaki, Myriam Seffar, Hakima Kabbaj, Saaid Amzazi, Lahcen Belyamani and Azeddine Ibrahim                                                                                                                                                                  |                                                                                                                                                                          |
| EPI_ISL_1166891, EPI_ISL_1166892, EPI_ISL_1166893, EPI_ISL_1166894, EPI_ISL_1166895, EPI_ISL_1166896, EPI_ISL_1166897, EPI_ISL_1166898, EPI_ISL_1166899, EPI_ISL_1166900, EPI_ISL_1166901, EPI_ISL_1166902, EPI_ISL_1166903, EPI_ISL_1166904, EPI_ISL_1166905, EPI_ISL_1166906, EPI_ISL_1166907, EPI_ISL_1166908, EPI_ISL_1166909, EPI_ISL_1166910, EPI_ISL_1166911, EPI_ISL_1166912, EPI_ISL_1166913, EPI_ISL_1166914, EPI_ISL_1166915, EPI_ISL_1166916, EPI_ISL_1166917, EPI_ISL_1166918, EPI_ISL_1166919, EPI_ISL_1166920, EPI_ISL_1166921, EPI_ISL_1166922, EPI_ISL_1166923, EPI_ISL_1166924, EPI_ISL_1166925, EPI_ISL_1166926, EPI_ISL_1166927, EPI_ISL_1166928, EPI_ISL_1166929, EPI_ISL_1166930, EPI_ISL_1166931, EPI_ISL_1166932, EPI_ISL_1166933, EPI_ISL_1166934, EPI_ISL_1166935, EPI_ISL_1166936, EPI_ISL_1166937, EPI_ISL_1166938, EPI_ISL_1166939, EPI_ISL_1166940, EPI_ISL_1166941, EPI_ISL_1166942, EPI_ISL_1166943, EPI_ISL_1166944, EPI_ISL_1166945, EPI_ISL_1166946, EPI_ISL_1166947, EPI_ISL_1166948, EPI_ISL_1166949, EPI_ISL_1166950, EPI_ISL_1166951, EPI_ISL_1166952, EPI_ISL_1166953, EPI_ISL_1166954, EPI_ISL_1166955, EPI_ISL_1166956, EPI_ISL_1166957, EPI_ISL_1166958, EPI_ISL_1166959, EPI_ISL_1166960, EPI_ISL_1166961, EPI_ISL_1166962, EPI_ISL_1166963, EPI_ISL_1166964, EPI_ISL_1166965, EPI_ISL_1166966, EPI_ISL_1166967, EPI_ISL_1166968, EPI_ISL_1166969, EPI_ISL_1166970, EPI_ISL_1166971, EPI_ISL_1166972, EPI_ISL_1166973, EPI_ISL_1166974, EPI_ISL_1166975, EPI_ISL_1166976, EPI_ISL_1166977, EPI_ISL_1166978, EPI_ISL_1166979, EPI_ISL_1166980, EPI_ISL_1166981, EPI_ISL_1166982, EPI_ISL_1166983, EPI_ISL_1166984, EPI_ISL_1166985, EPI_ISL_1166986, EPI_ISL_1166987, EPI_ISL_1166988, EPI_ISL_1166989, EPI_ISL_1166990, EPI_ISL_1166991, EPI_ISL_1166992, EPI_ISL_1166993, EPI_ISL_1166994, EPI_ISL_1166995, EPI_ISL_1166996, EPI_ISL_1166997, EPI_ISL_1166998, EPI_ISL_1166999, EPI_ISL_1167000, EPI_ISL_1167001, EPI_ISL_1167002, EPI_ISL_1167003, EPI_ISL_1167004, EPI_ISL_1167005, EPI_ISL_1167006, EPI_ISL_1167007, EPI_ISL_1167008, EPI_ISL_1167009, EPI_ISL_1167010, EPI_ISL_1167011, EPI_ISL_1167012, EPI_ISL_1167013, EPI_ISL_1167014, EPI_ISL_1167015, EPI_ISL_1167016, EPI_ISL_1167017, EPI_ISL_1167018, EPI_ISL_1167019, EPI_ISL_1167020, EPI_ISL_1167021 | see above                                                         | Hopital                                                                                         | National Reference Center for Viruses of Respiratory Infections, Institut Pasteur, Paris                                                                                                                                                                                                                                             | Marion Barbet, Sylvie Behillil, Méline Bizard, Angela Brisebarre, Camille Capel, Etienne Simon-Lorière, Vincent Enouf, Maud Vanpeene, Sylvie van der Werf, Combe Patrice |
| EPI_ISL_1167125, EPI_ISL_1167126, EPI_ISL_1167127, EPI_ISL_1167128, EPI_ISL_1167129, EPI_ISL_1167130, EPI_ISL_1167131, EPI_ISL_1167132, EPI_ISL_1167133, EPI_ISL_1167134, EPI_ISL_1167136, EPI_ISL_1167137, EPI_ISL_1167138, EPI_ISL_1167139, EPI_ISL_1167140, EPI_ISL_1167142, EPI_ISL_1167143, EPI_ISL_1167144, EPI_ISL_1167147, EPI_ISL_1167148, EPI_ISL_1167149, EPI_ISL_1167150, EPI_ISL_1167151, EPI_ISL_1167152, EPI_ISL_1167153, EPI_ISL_1167154, EPI_ISL_1167155, EPI_ISL_1167156, EPI_ISL_1167157, EPI_ISL_1167158, EPI_ISL_1167159, EPI_ISL_1167160, EPI_ISL_1167161, EPI_ISL_1167162, EPI_ISL_1167163, EPI_ISL_1167164, EPI_ISL_1167165, EPI_ISL_1167166, EPI_ISL_1167167, EPI_ISL_1167168, EPI_ISL_1167169, EPI_ISL_1167170, EPI_ISL_1167171, EPI_ISL_1167172, EPI_ISL_1167173, EPI_ISL_1167174, EPI_ISL_1167175, EPI_ISL_1167176, EPI_ISL_1167177, EPI_ISL_1167178, EPI_ISL_1167179, EPI_ISL_1167180, EPI_ISL_1167181, EPI_ISL_1167182, EPI_ISL_1167183, EPI_ISL_1167184                                                                                                                                                                                                                                                                                                                                                                                                                                                                                                                                                                                                                                                                                                                                                                                                                                                                                                                                                                                                                                                                                                                                                                                                                                                                                                                            | see above                                                         | Iressef Genomics lab                                                                            | L'institut de Recherche en Santé, de Surveillance Épidémiologique et de Formation (IRESSEF)                                                                                                                                                                                                                                          |                                                                                                                                                                          |
| EPI_ISL_1169919                                                                                                                                                                                                                                                                                                                                                                                                                                                                                                                                                                                                                                                                                                                                                                                                                                                                                                                                                                                                                                                                                                                                                                                                                                                                                                                                                                                                                                                                                                                                                                                                                                                                                                                                                                                                                                                                                                                                                                                                                                                                                                                                                                                                                                                                                                   | HIV Molecular Laboratory, Ethiopian Public Health Institute       | HIV Molecular Laboratory, Ethiopian Public Health Institute                                     | Souleymane MBOUP, Abdou PADANE, Abdoulie KANTEH, Abdul Karim SESAY, Khadim GUEYE, Papa Alassane DIAW, Birahim Piere NDIAYE, Barada CISSE, Aminata MBOUP, Moustapha MBOW, Ndeye Coumba Toure KANE, Nafisatou LEYE, Gora LO, Ambroise AHOUIDI, Astou Gaye GAYE, Aminata DIA, Yacine DIA                                                |                                                                                                                                                                          |
| EPI_ISL_1170956                                                                                                                                                                                                                                                                                                                                                                                                                                                                                                                                                                                                                                                                                                                                                                                                                                                                                                                                                                                                                                                                                                                                                                                                                                                                                                                                                                                                                                                                                                                                                                                                                                                                                                                                                                                                                                                                                                                                                                                                                                                                                                                                                                                                                                                                                                   | HIV Molecular Lab, Ethiopian Public Health Institute              | HIV Molecular Lab                                                                               | Weldemariam.A.G., Vanaerschot.M., Abichu.G., Kidane.E., Damena.D., Tessema.S.K., Gutema.G., Ahyong.V., Detweiler.A., Tan.M., Neff.N., Fahsbender.E., Kalantar.K., Leta.D. and Tato.C.                                                                                                                                                |                                                                                                                                                                          |
| EPI_ISL_1173207, EPI_ISL_1173208, EPI_ISL_1173209, EPI_ISL_1173210, EPI_ISL_1173211, EPI_ISL_1173212, EPI_ISL_1173213, EPI_ISL_1173214, EPI_ISL_1173215, EPI_ISL_1173216, EPI_ISL_1173217, EPI_ISL_1173218, EPI_ISL_1173219, EPI_ISL_1173220, EPI_ISL_1173221, EPI_ISL_1173222, EPI_ISL_1173223, EPI_ISL_1173224, EPI_ISL_1173225, EPI_ISL_1173226, EPI_ISL_1173227, EPI_ISL_1173228, EPI_ISL_1173229, EPI_ISL_1173230, EPI_ISL_1173231, EPI_ISL_1173232, EPI_ISL_1173233, EPI_ISL_1173234, EPI_ISL_1173235, EPI_ISL_1173236, EPI_ISL_1173237, EPI_ISL_1173238, EPI_ISL_1173239, EPI_ISL_1173240, EPI_ISL_1173241, EPI_ISL_1173242, EPI_ISL_1173243, EPI_ISL_1173244, EPI_ISL_1173245, EPI_ISL_1173246                                                                                                                                                                                                                                                                                                                                                                                                                                                                                                                                                                                                                                                                                                                                                                                                                                                                                                                                                                                                                                                                                                                                                                                                                                                                                                                                                                                                                                                                                                                                                                                                            | see above                                                         | Nigeria Centre for Disease Control (NCDC)                                                       | African Centre for Excellence for Genomics of Infectious Diseases (ACEGID), Redeemer's University                                                                                                                                                                                                                                    |                                                                                                                                                                          |
| EPI_ISL_1190749, EPI_ISL_1190750, EPI_ISL_1190751, EPI_ISL_1190752, EPI_ISL_1190753, EPI_ISL_1190754, EPI_ISL_1190755, EPI_ISL_1190756, EPI_ISL_1190757, EPI_ISL_1190758, EPI_ISL_1190759, EPI_ISL_1190760, EPI_ISL_1190761, EPI_ISL_1190762, EPI_ISL_1190763, EPI_ISL_1190764, EPI_ISL_1190765                                                                                                                                                                                                                                                                                                                                                                                                                                                                                                                                                                                                                                                                                                                                                                                                                                                                                                                                                                                                                                                                                                                                                                                                                                                                                                                                                                                                                                                                                                                                                                                                                                                                                                                                                                                                                                                                                                                                                                                                                   | see above                                                         | CREMER(Centre de Recherches sur les Maladies Emergentes et Ré-émergentes)                       | Celestin Godwe, Christelle Butel, Ertim Maidadi Foudi, Laetitia Serrano, Dowbiss Meta Djoms, Nicole Vidal, Esemu Livo, Rodrigue Kanga, Marie Amougou, Y Mintl Mpoudi Ngole, Ahidjo Ayouba, Marcel Tongo, Marcel Peeters, Eloi Delaporte                                                                                              |                                                                                                                                                                          |
| EPI_ISL_1190785                                                                                                                                                                                                                                                                                                                                                                                                                                                                                                                                                                                                                                                                                                                                                                                                                                                                                                                                                                                                                                                                                                                                                                                                                                                                                                                                                                                                                                                                                                                                                                                                                                                                                                                                                                                                                                                                                                                                                                                                                                                                                                                                                                                                                                                                                                   | CHR LA REUNION FELIX GUYON                                        | CNR Virus des Infections Respiratoires - France SUD                                             | Antonin Bal, Gregory Destras, Gwendolyne Burfin, Hadrien Règue, Quentin Semanas, Martine Valette, Bruno Lina, Laurence Josset                                                                                                                                                                                                        |                                                                                                                                                                          |
| EPI_ISL_1191598, EPI_ISL_1191599, EPI_ISL_1191600, EPI_ISL_1191601, EPI_ISL_1191602, EPI_ISL_1191603, EPI_ISL_1191604, EPI_ISL_1191605, EPI_ISL_1191608                                                                                                                                                                                                                                                                                                                                                                                                                                                                                                                                                                                                                                                                                                                                                                                                                                                                                                                                                                                                                                                                                                                                                                                                                                                                                                                                                                                                                                                                                                                                                                                                                                                                                                                                                                                                                                                                                                                                                                                                                                                                                                                                                           | Virology Department, Victoria Hospital, Plaine-Wilhems, Mauritius | National Institute for Communicable Diseases of the National Health Laboratory Service          | Ramuth M, Manraj SS, Sonoo J, Baboo SB, Amoako DG, Scheepers C, Mohale T, Ntuli N, Mahlangu B, Ismail A, Bhiman JN                                                                                                                                                                                                                   |                                                                                                                                                                          |
| EPI_ISL_1191967, EPI_ISL_1191968, EPI_ISL_1191969, EPI_ISL_1191970, EPI_ISL_1191971, EPI_ISL_1191972, EPI_ISL_1191973, EPI_ISL_1191974, EPI_ISL_1191975, EPI_ISL_1191976, EPI_ISL_1191977, EPI_ISL_1191978, EPI_ISL_1191979, EPI_ISL_1191980, EPI_ISL_1191981, EPI_ISL_1191982, EPI_ISL_1191983, EPI_ISL_1191984, EPI_ISL_1191985, EPI_ISL_1191986, EPI_ISL_1191987, EPI_ISL_1191988, EPI_ISL_1191989, EPI_ISL_1191990, EPI_ISL_1191991, EPI_ISL_1191992, EPI_ISL_1191993, EPI_ISL_1191994, EPI_ISL_1191995, EPI_ISL_1191996, EPI_ISL_1191997, EPI_ISL_1191998, EPI_ISL_1191999, EPI_ISL_1192000, EPI_ISL_1192001, EPI_ISL_1192002, EPI_ISL_1192003, EPI_ISL_1192004, EPI_ISL_1192005, EPI_ISL_1192006, EPI_ISL_1192007, EPI_ISL_1192008, EPI_ISL_1192009, EPI_ISL_1192010, EPI_ISL_1192011, EPI_ISL_1192012, EPI_ISL_1192013, EPI_ISL_1192014, EPI_ISL_1192015, EPI_ISL_1192016, EPI_ISL_1192017, EPI_ISL_1192018, EPI_ISL_1192019, EPI_ISL_1192020, EPI_ISL_1192021, EPI_ISL_1192022, EPI_ISL_1192023, EPI_ISL_1192024, EPI_ISL_1192025, EPI_ISL_1192026, EPI_ISL_1192027, EPI_ISL_1192028, EPI_ISL_1192029, EPI_ISL_1192030, EPI_ISL_1192031, EPI_ISL_1192032, EPI_ISL_1192033, EPI_ISL_1192034, EPI_ISL_1192035, EPI_ISL_1192036, EPI_ISL_1192037, EPI_ISL_1192038, EPI_ISL_1192039, EPI_ISL_1192040, EPI_ISL_1192041, EPI_ISL_1192042, EPI_ISL_1192043, EPI_ISL_1192044, EPI_ISL_1192045, EPI_ISL_1192046, EPI_ISL_1192047, EPI_ISL_1192048, EPI_ISL_1192049, EPI_ISL_1192050, EPI_ISL_1192051, EPI_ISL_1192052, EPI_ISL_1192053, EPI_ISL_1192054, EPI_ISL_1192055, EPI_ISL_1192056, EPI_ISL_1192057, EPI_ISL_1192058, EPI_ISL_1192059, EPI_ISL_1192060, EPI_ISL_1192061, EPI_ISL_1192062, EPI_ISL_1192063, EPI_ISL_1192064, EPI_ISL_1192065, EPI_ISL_1192066, EPI_ISL_1192067, EPI_ISL_1192068, EPI_ISL_1192069, EPI_ISL_1192070, EPI_ISL_1192071, EPI_ISL_1192072, EPI_ISL_1192073, EPI_ISL_1192074, EPI_ISL_1192075                                                                                                                                                                                                                                                                                                                                                                                       | see above                                                         | National Microbiology Reference Laboratory                                                      | Quadram Institute Bioscience                                                                                                                                                                                                                                                                                                         |                                                                                                                                                                          |
| EPI_ISL_1195297, EPI_ISL_1195299, EPI_ISL_1195301                                                                                                                                                                                                                                                                                                                                                                                                                                                                                                                                                                                                                                                                                                                                                                                                                                                                                                                                                                                                                                                                                                                                                                                                                                                                                                                                                                                                                                                                                                                                                                                                                                                                                                                                                                                                                                                                                                                                                                                                                                                                                                                                                                                                                                                                 | National Microbiology Reference Laboratory                        | Quadram Institute Bioscience                                                                    | Tapfumaneni Mashe, Faustinos T Takawira, Hlanai Gumbo, Kenneth K Maeka, Agnes Juru, Charles Nyagupe, Sekesai Zinyowera, Muchaneta Mugabe, Thanh Le Viet, Justin O'Grady, Gemma Kay, David Baker, Gaetan Thilliez, Ana-Victoria Gutierrez, Robert Kingsley, Leonardo de Oliveira Martins, Andrew Tarupia, Andrew J. Page, Raiva Simbi |                                                                                                                                                                          |
|                                                                                                                                                                                                                                                                                                                                                                                                                                                                                                                                                                                                                                                                                                                                                                                                                                                                                                                                                                                                                                                                                                                                                                                                                                                                                                                                                                                                                                                                                                                                                                                                                                                                                                                                                                                                                                                                                                                                                                                                                                                                                                                                                                                                                                                                                                                   |                                                                   |                                                                                                 | Tapfumaneni Mashe, Faustinos T Takawira, Hlanai Gumbo, Kenneth K Maeka, Agnes Juru, Charles Nyagupe, Sekesai Zinyowera, Muchaneta Mugabe, Thanh Le Viet, Justin O'Grady, Gemma Kay, David Baker, Gaetan Thilliez, Ana-Victoria Gutierrez, Robert Kingsley, Leonardo de Oliveira Martins, Andrew Tarupia, Andrew J. Page, Raiva Simbi |                                                                                                                                                                          |

|                                                                                                                                                                                                                                                                                                                                                                                                                                                                                                                                                                                                                                                                                                                                                           |                                                                                                            |                                                                                                                                                                       |                                                                                                                                                                                                                                                                                                                                                          |
|-----------------------------------------------------------------------------------------------------------------------------------------------------------------------------------------------------------------------------------------------------------------------------------------------------------------------------------------------------------------------------------------------------------------------------------------------------------------------------------------------------------------------------------------------------------------------------------------------------------------------------------------------------------------------------------------------------------------------------------------------------------|------------------------------------------------------------------------------------------------------------|-----------------------------------------------------------------------------------------------------------------------------------------------------------------------|----------------------------------------------------------------------------------------------------------------------------------------------------------------------------------------------------------------------------------------------------------------------------------------------------------------------------------------------------------|
| EPI_ISL_1196006                                                                                                                                                                                                                                                                                                                                                                                                                                                                                                                                                                                                                                                                                                                                           | TLC Clinic                                                                                                 | National Institute for Communicable Diseases of the National Health Laboratory Service                                                                                | Maphalala GP, Amoako DG, Scheepers C, Mohale T, Ntuli N, Mahlangu B, Ismail A, Bhiman JN                                                                                                                                                                                                                                                                 |
| EPI_ISL_1196007                                                                                                                                                                                                                                                                                                                                                                                                                                                                                                                                                                                                                                                                                                                                           | Mbabane Gov Hospital                                                                                       | National Institute for Communicable Diseases of the National Health Laboratory Service                                                                                | Maphalala GP, Amoako DG, Scheepers C, Mohale T, Ntuli N, Mahlangu B, Ismail A, Bhiman JN                                                                                                                                                                                                                                                                 |
| EPI_ISL_1196012                                                                                                                                                                                                                                                                                                                                                                                                                                                                                                                                                                                                                                                                                                                                           | Homecare                                                                                                   | National Institute for Communicable Diseases of the National Health Laboratory Service                                                                                | Maphalala GP, Amoako DG, Scheepers C, Mohale T, Ntuli N, Mahlangu B, Ismail A, Bhiman JN                                                                                                                                                                                                                                                                 |
| EPI_ISL_1196013                                                                                                                                                                                                                                                                                                                                                                                                                                                                                                                                                                                                                                                                                                                                           | Hlathikhulu Government Hospital                                                                            | National Institute for Communicable Diseases of the National Health Laboratory Service                                                                                | Maphalala GP, Amoako DG, Scheepers C, Mohale T, Ntuli N, Mahlangu B, Ismail A, Bhiman JN                                                                                                                                                                                                                                                                 |
| EPI_ISL_1196014                                                                                                                                                                                                                                                                                                                                                                                                                                                                                                                                                                                                                                                                                                                                           | Homecare                                                                                                   | National Institute for Communicable Diseases of the National Health Laboratory Service                                                                                | Maphalala GP, Amoako DG, Scheepers C, Mohale T, Ntuli N, Mahlangu B, Ismail A, Bhiman JN                                                                                                                                                                                                                                                                 |
| EPI_ISL_1196020, EPI_ISL_1196021                                                                                                                                                                                                                                                                                                                                                                                                                                                                                                                                                                                                                                                                                                                          | Nhlangano Health Centre                                                                                    | National Institute for Communicable Diseases of the National Health Laboratory Service                                                                                | Maphalala GP, Amoako DG, Scheepers C, Mohale T, Ntuli N, Mahlangu B, Ismail A, Bhiman JN                                                                                                                                                                                                                                                                 |
| EPI_ISL_1197037                                                                                                                                                                                                                                                                                                                                                                                                                                                                                                                                                                                                                                                                                                                                           | Laboratoire de virologie clinique - Institut Pasteur de Tunis                                              | 1-Laboratory of Microbiology, National Reference Lab, Charles Nicolle Hospital; 2-University of Tunis ElManar, Faculty of Medicine of Tunis, LR99ES09, Tunis, Tunisia | Sameh Trabelsi, Nissaf Ben Alaya, Mouna Ben Sassi, Sana Ferjani, Mouna Safer, Salma Abid, Fares Wasfi, Mariem Gdoura, Sondes Haddad, Anissa Chouikha, Roua Ben Othman, Sara Chammam, Ines Mdiini, Manel Ben Sassi, Imen Kacem, Maher Kharrat, Alia BenKahla, Jalila Ben Khellil, Riadh Daghfous, Riadh Gouider, Henda Triki, Ilhem Boutiba-Ben Boubaker. |
| EPI_ISL_1197041                                                                                                                                                                                                                                                                                                                                                                                                                                                                                                                                                                                                                                                                                                                                           | Nigeria Centre For Disease Control                                                                         | National Reference Laboratory, NCDC, Gaduwa, Abuja                                                                                                                    | Dr Ndodo Nnaemeka, Olusola Anuoluwapo Akanbi, Chimaobi Chukwu, Dr Omoare Adesuyi, Anthony Ahumibe, Naidoo Dhamari, Catherine Okoi, Nwando Mba, Dr Chikwe Ihekweazu                                                                                                                                                                                       |
| EPI_ISL_1197062                                                                                                                                                                                                                                                                                                                                                                                                                                                                                                                                                                                                                                                                                                                                           | Nigeria Centre For Disease Control                                                                         | National reference Laboratory, NCDC, Gaduwa, Abuja                                                                                                                    | Dr Ndodo Nnaemeka, Olusola Anuoluwapo Akanbi, Chimaobi Chukwu, Dr Omoare Adesuyi, Anthony Ahumibe, Catherine Okoi, Naidoo Dhamari, Nwando Mba, Dr Chikwe Ihekweazu                                                                                                                                                                                       |
| EPI_ISL_1197063, EPI_ISL_1197064, EPI_ISL_1197065, EPI_ISL_1197066                                                                                                                                                                                                                                                                                                                                                                                                                                                                                                                                                                                                                                                                                        | Nigeria Centre For Disease Control                                                                         | National reference Laboratory, NCDC, Gaduwa, Abuja                                                                                                                    | Dr Ndodo Nnaemeka, Olusola Anuoluwapo Akanbi, Chimaobi Chukwu, Dr Omoare Adesuyi, Catherine Okoi, Anthony Ahumibe, Naidoo Dhamari, Nwando Mba, Dr Chikwe Ihekweazu                                                                                                                                                                                       |
| EPI_ISL_1197129                                                                                                                                                                                                                                                                                                                                                                                                                                                                                                                                                                                                                                                                                                                                           | Nigeria Centre For Disease Control                                                                         | National reference Laboratory, NCDC, Gaduwa, Abuja                                                                                                                    | Dr Ndodo Nnaemeka, Olusola Anuoluwapo Akanbi, Chimaobi Chukwu, Dr Omoare Adesuyi, Anthony Ahumibe, Catherine Okoi, Nwando Mba, Dr Chikwe Ihekweazu                                                                                                                                                                                                       |
| EPI_ISL_1197130                                                                                                                                                                                                                                                                                                                                                                                                                                                                                                                                                                                                                                                                                                                                           | Nigeria Centre For Disease Control                                                                         | National reference Laboratory, NCDC, Gaduwa, Abuja                                                                                                                    | Dr Ndodo Nnaemeka, Olusola Anuoluwapo Akanbi, Chimaobi Chukwu, Dr Omoare Adesuyi, Anthony Ahumibe, Naidoo Dhamari, Nwando Mba, Dr Chikwe Ihekweazu                                                                                                                                                                                                       |
| EPI_ISL_1197150                                                                                                                                                                                                                                                                                                                                                                                                                                                                                                                                                                                                                                                                                                                                           | Nigeria Centre For Disease Control                                                                         | National reference Laboratory, NCDC, Gaduwa, Abuja                                                                                                                    | Dr Ndodo Nnaemeka, Olusola Anuoluwapo Akanbi, Chimaobi Chukwu, Dr Omoare Adesuyi, Catherine Okoi, Anthony Ahumibe, Naidoo Dhamari, Nwando Mba, Dr Chikwe Ihekweazu                                                                                                                                                                                       |
| EPI_ISL_1197933, EPI_ISL_1198006                                                                                                                                                                                                                                                                                                                                                                                                                                                                                                                                                                                                                                                                                                                          | Nigeria Centre For Disease Control                                                                         | National reference Laboratory, NCDC, Gaduwa, Abuja                                                                                                                    | Dr Ndodo Nnaemeka, Olusola Anuoluwapo Akanbi, Chimaobi Chukwu, Dr Omoare Adesuyi, Anthony Ahumibe, Naidoo Dhamari, Nwando Mba, Dr Chikwe Ihekweazu                                                                                                                                                                                                       |
| EPI_ISL_1201511, EPI_ISL_1201512, EPI_ISL_1201513, EPI_ISL_1201514, EPI_ISL_1201515, EPI_ISL_1201516, EPI_ISL_1201517, EPI_ISL_1201518, EPI_ISL_1201519                                                                                                                                                                                                                                                                                                                                                                                                                                                                                                                                                                                                   | Outre mer                                                                                                  | National Reference Center for Viruses of Respiratory Infections, Institut Pasteur, Paris                                                                              | Marion Barbet, Sylvie Behillil, Méline Bizard, Angela Brisebarre, Camille Capel, Etienne Simon-Lorière, Vincent Enouf, Maud Vanpeene, Sylvie van der Werf,Combe Patrice                                                                                                                                                                                  |
| EPI_ISL_1208399                                                                                                                                                                                                                                                                                                                                                                                                                                                                                                                                                                                                                                                                                                                                           | Laboratoire de virologie clinique - Institut Pasteur de Tunis                                              | 1-Laboratory of Microbiology, National Reference Lab, Charles Nicolle Hospital; 2-University of Tunis ElManar, Faculty of Medicine of Tunis, LR99ES09, Tunis, Tunisia | Sameh Trabelsi, Nissaf Ben Alaya, Mouna Ben Sassi, Sana Ferjani, Mouna Safer, Salma Abid, Fares Wasfi, Mariem Gdoura, Sondes Haddad, Anissa Chouikha, Roua Ben Othman, Sara Chammam, Ines Mdiini, Manel Ben Sassi, Imen Kacem, Maher Kharrat, Alia BenKahla, Jalila Ben Khellil, Riadh Daghfous, Riadh Gouider, Henda Triki, Ilhem Boutiba-Ben Boubaker. |
| EPI_ISL_1209013                                                                                                                                                                                                                                                                                                                                                                                                                                                                                                                                                                                                                                                                                                                                           | University of Namibia (UNAM LAB)                                                                           | National Institute for Communicable Diseases of the National Health Laboratory Service                                                                                | Van Rooyen G, Konstantinus I, Amoako DG, Scheepers C, Mohale T, Ntuli N, Mahlangu B, Ismail A, Bhiman JN                                                                                                                                                                                                                                                 |
| EPI_ISL_1216070, EPI_ISL_1216072, EPI_ISL_1216074, EPI_ISL_1216076, EPI_ISL_1216077, EPI_ISL_1216079                                                                                                                                                                                                                                                                                                                                                                                                                                                                                                                                                                                                                                                      | MRCG at LSHTM Genomics lab                                                                                 | MRCG at LSHTM Genomics lab                                                                                                                                            | Abdul Karim sesay, Abdoulie Kanteh, Jarra Manneh, Mariama Kujabi, Bakary Sanyang                                                                                                                                                                                                                                                                         |
| EPI_ISL_1229367, EPI_ISL_1229368                                                                                                                                                                                                                                                                                                                                                                                                                                                                                                                                                                                                                                                                                                                          | AHRI-Sigal                                                                                                 | KRISP, KZN Research Innovation and Sequencing Platform                                                                                                                | Sigal A, Karim F, Cele S, Gazy I, Giandhari J, Pillay S, Tegally H, Wilkinson E, de Oliveira T                                                                                                                                                                                                                                                           |
| EPI_ISL_1234525, EPI_ISL_1234526, EPI_ISL_1234528, EPI_ISL_1234529, EPI_ISL_1234530, EPI_ISL_1234533                                                                                                                                                                                                                                                                                                                                                                                                                                                                                                                                                                                                                                                      | MRCG at LSHTM Genomics lab                                                                                 | MRCG at LSHTM Genomics lab                                                                                                                                            | Abdul Karim sesay, Abdoulie Kanteh, Jarra Manneh, Mariama Kujabi, Bakary Sanyang                                                                                                                                                                                                                                                                         |
| EPI_ISL_1235642, EPI_ISL_1235643, EPI_ISL_1235644, EPI_ISL_1235645, EPI_ISL_1235646, EPI_ISL_1235647, EPI_ISL_1235648, EPI_ISL_1235649, EPI_ISL_1235650, EPI_ISL_1235651, EPI_ISL_1235652, EPI_ISL_1235653, EPI_ISL_1235654, EPI_ISL_1235655, EPI_ISL_1235656, EPI_ISL_1235657, EPI_ISL_1235658, EPI_ISL_1235659, EPI_ISL_1235660, EPI_ISL_1235661, EPI_ISL_1235662, EPI_ISL_1235663, EPI_ISL_1235664, EPI_ISL_1235665, EPI_ISL_1235666, EPI_ISL_1235667                                                                                                                                                                                                                                                                                                  | see above                                                                                                  | Nigerian Centre for Disease Control (NCDC)                                                                                                                            | African Centre of Excellence for Genomics of Infectious Diseases (ACEGID), Redeemer's University                                                                                                                                                                                                                                                         |
| see above                                                                                                                                                                                                                                                                                                                                                                                                                                                                                                                                                                                                                                                                                                                                                 | Nigerian Centre for Disease Control (NCDC)                                                                 | African Centre of Excellence for Genomics of Infectious Diseases (ACEGID), Redeemer's University                                                                      | Olawoye, I.B., et al                                                                                                                                                                                                                                                                                                                                     |
| EPI_ISL_1239227, EPI_ISL_1239229, EPI_ISL_1239230, EPI_ISL_1239231, EPI_ISL_1239232, EPI_ISL_1239234, EPI_ISL_1239238, EPI_ISL_1239262                                                                                                                                                                                                                                                                                                                                                                                                                                                                                                                                                                                                                    | Kimberley Hospital, National Health Laboratory Services, Northern Cape, South Africa                       | National Institute for Communicable Diseases of the National Health Laboratory Service                                                                                | Amoako DG, Scheepers C, Mohale T, Ntuli N, Mahlangu B, Ismail A, Bhiman JN                                                                                                                                                                                                                                                                               |
| EPI_ISL_1239290, EPI_ISL_1239291, EPI_ISL_1239293, EPI_ISL_1239295, EPI_ISL_1239301, EPI_ISL_1239302, EPI_ISL_1239303, EPI_ISL_1239304, EPI_ISL_1239313, EPI_ISL_1239318, EPI_ISL_1239319, EPI_ISL_1239320, EPI_ISL_1239321, EPI_ISL_1239322, EPI_ISL_1239323, EPI_ISL_1239324, EPI_ISL_1239325, EPI_ISL_1239326, EPI_ISL_1239328, EPI_ISL_1239329                                                                                                                                                                                                                                                                                                                                                                                                        | see above                                                                                                  | Charlote Maxeke Johannesburg Academic Hospital, National Health Laboratory Services, Gauteng, South Africa                                                            | National Institute for Communicable Diseases of the National Health Laboratory Service                                                                                                                                                                                                                                                                   |
| see above                                                                                                                                                                                                                                                                                                                                                                                                                                                                                                                                                                                                                                                                                                                                                 | Charlote Maxeke Johannesburg Academic Hospital, National Health Laboratory Services, Gauteng, South Africa | National Institute for Communicable Diseases of the National Health Laboratory Service                                                                                | Amoako DG, Scheepers C, Mohale T, Ntuli N, Mahlangu B, Ismail A, Bhiman JN                                                                                                                                                                                                                                                                               |
| EPI_ISL_1240719, EPI_ISL_1240720, EPI_ISL_1240721, EPI_ISL_1240722, EPI_ISL_1240723                                                                                                                                                                                                                                                                                                                                                                                                                                                                                                                                                                                                                                                                       | Influenza and respiratory viruses                                                                          | Human virology Department                                                                                                                                             | A.Hachid, F.Khardine, M.A.Beloufa, A.Bensalem, F.Derrar                                                                                                                                                                                                                                                                                                  |
| EPI_ISL_1242009, EPI_ISL_1242010, EPI_ISL_1242011, EPI_ISL_1242012, EPI_ISL_1242013, EPI_ISL_1242014, EPI_ISL_1242015, EPI_ISL_1242016, EPI_ISL_1242017, EPI_ISL_1242018, EPI_ISL_1242019, EPI_ISL_1242020, EPI_ISL_1242021, EPI_ISL_1242022, EPI_ISL_1242023, EPI_ISL_1242024, EPI_ISL_1242025, EPI_ISL_1242026, EPI_ISL_1242027, EPI_ISL_1242028                                                                                                                                                                                                                                                                                                                                                                                                        | see above                                                                                                  | Nigeria Centre for Disease Control (NCDC)                                                                                                                             | African Centre of Excellence for Genomics of Infectious Diseases (ACEGID), Redeemer's University                                                                                                                                                                                                                                                         |
| see above                                                                                                                                                                                                                                                                                                                                                                                                                                                                                                                                                                                                                                                                                                                                                 | Nigeria Centre for Disease Control (NCDC)                                                                  | African Centre of Excellence for Genomics of Infectious Diseases (ACEGID), Redeemer's University                                                                      | Oluniyi P.E. et al                                                                                                                                                                                                                                                                                                                                       |
| EPI_ISL_1250356, EPI_ISL_1250358, EPI_ISL_1250359, EPI_ISL_1250361, EPI_ISL_1250362, EPI_ISL_1250364, EPI_ISL_1250366, EPI_ISL_1250367, EPI_ISL_1250369, EPI_ISL_1250370, EPI_ISL_1250371, EPI_ISL_1250373, EPI_ISL_1250375, EPI_ISL_1250376, EPI_ISL_1250378, EPI_ISL_1250379, EPI_ISL_1250381, EPI_ISL_1250383, EPI_ISL_1250385, EPI_ISL_1250386, EPI_ISL_1250388, EPI_ISL_1250390, EPI_ISL_1250392, EPI_ISL_1250393, EPI_ISL_1250394, EPI_ISL_1250396, EPI_ISL_1250397, EPI_ISL_1250399, EPI_ISL_1250401, EPI_ISL_1250402, EPI_ISL_1250404, EPI_ISL_1250405, EPI_ISL_1250407, EPI_ISL_1250409, EPI_ISL_1250410, EPI_ISL_1250412, EPI_ISL_1250413, EPI_ISL_1250414, EPI_ISL_1250416, EPI_ISL_1250417, EPI_ISL_1250419, EPI_ISL_1250420, EPI_ISL_1250422 | see above                                                                                                  | Netcare/AMPATH                                                                                                                                                        | KRISP, KZN Research Innovation and Sequencing Platform                                                                                                                                                                                                                                                                                                   |
| see above                                                                                                                                                                                                                                                                                                                                                                                                                                                                                                                                                                                                                                                                                                                                                 | Netcare/AMPATH                                                                                             | KRISP, KZN Research Innovation and Sequencing Platform                                                                                                                | Giandhari J, Pillay S, Maslo C, Sitharam L, Lessells R, Mdlalose K, York D, Khan S, Emmanuel SJ, Tegally H, Wilkinson E, de Oliveira T                                                                                                                                                                                                                   |
| EPI_ISL_1250552                                                                                                                                                                                                                                                                                                                                                                                                                                                                                                                                                                                                                                                                                                                                           | Molecular Diagnostics Services (MDS)                                                                       | KRISP, KZN Research Innovation and Sequencing Platform                                                                                                                | Giandhari J, Pillay S, Maslo C, Sitharam L, Lessells R, Mdlalose K, York D, Khan S, Emmanuel SJ, Tegally H, Wilkinson E, de Oliveira T                                                                                                                                                                                                                   |
| EPI_ISL_1255120, EPI_ISL_1255121, EPI_ISL_1255122, EPI_ISL_1255123, EPI_ISL_1255124, EPI_ISL_1255125, EPI_ISL_1255126, EPI_ISL_1255127, EPI_ISL_1255128, EPI_ISL_1255129, EPI_ISL_1255130, EPI_ISL_1255131, EPI_ISL_1255132, EPI_ISL_1255133, EPI_ISL_1255134, EPI_ISL_1255135, EPI_ISL_1255136, EPI_ISL_1255137, EPI_ISL_1255138, EPI_ISL_1255139, EPI_ISL_1255140, EPI_ISL_1255141, EPI_ISL_1255157, EPI_ISL_1255158, EPI_ISL_1255159, EPI_ISL_1255160, EPI_ISL_1255161, EPI_ISL_1255162, EPI_ISL_1255184, EPI_ISL_1255185, EPI_ISL_1255201, EPI_ISL_1255202, EPI_ISL_1255203, EPI_ISL_1255204,                                                                                                                                                         | see above                                                                                                  | Netcare/AMPATH                                                                                                                                                        | KRISP, KZN Research Innovation and Sequencing Platform                                                                                                                                                                                                                                                                                                   |

|                                                                                                                                                                                                                                                                                                                                                                                                                                                                                                                                                                                                                                                                                                                                                                                                                                                                                                                                                                                                                                                                                                                                                                  |           |                                                                                                           |                                                                                                                             |                                                                                                                                                                                                                                                                                                                                                                                                                                                                                                              |
|------------------------------------------------------------------------------------------------------------------------------------------------------------------------------------------------------------------------------------------------------------------------------------------------------------------------------------------------------------------------------------------------------------------------------------------------------------------------------------------------------------------------------------------------------------------------------------------------------------------------------------------------------------------------------------------------------------------------------------------------------------------------------------------------------------------------------------------------------------------------------------------------------------------------------------------------------------------------------------------------------------------------------------------------------------------------------------------------------------------------------------------------------------------|-----------|-----------------------------------------------------------------------------------------------------------|-----------------------------------------------------------------------------------------------------------------------------|--------------------------------------------------------------------------------------------------------------------------------------------------------------------------------------------------------------------------------------------------------------------------------------------------------------------------------------------------------------------------------------------------------------------------------------------------------------------------------------------------------------|
| EPI_ISL_1255205, EPI_ISL_1255206, EPI_ISL_1255207, EPI_ISL_1255208, EPI_ISL_1255209, EPI_ISL_1255210, EPI_ISL_1255211, EPI_ISL_1255212, EPI_ISL_1255213, EPI_ISL_1255214, EPI_ISL_1255215, EPI_ISL_1255216, EPI_ISL_1255217, EPI_ISL_1255218, EPI_ISL_1255219, EPI_ISL_1255220, EPI_ISL_1255221, EPI_ISL_1255222, EPI_ISL_1255223, EPI_ISL_1255224, EPI_ISL_1255225, EPI_ISL_1255226, EPI_ISL_1255227, EPI_ISL_1255229, EPI_ISL_1255264, EPI_ISL_1255265, EPI_ISL_1255266, EPI_ISL_1255267, EPI_ISL_1255268, EPI_ISL_1255269, EPI_ISL_1255270, EPI_ISL_1255271, EPI_ISL_1255272, EPI_ISL_1255273, EPI_ISL_1255274, EPI_ISL_1255275, EPI_ISL_1255276, EPI_ISL_1255277                                                                                                                                                                                                                                                                                                                                                                                                                                                                                             | see above | West African Centre for Cell Biology of Infectious Pathogens (WACCBIP), University of Ghana, Accra, Ghana | West African Centre for Cell Biology of Infectious Pathogens (WACCBIP), University of Ghana, Volta Road, Legon-Accra, Ghana | Collins M. Morang'a, Joyce M. Ngoi, Evelyn B. Quansah, Samirah Saidi, Dominic S.Y. Amuzu, Vincent Appiah, Philip M. Soglo, Vanessa Magnussen, Aisha Mohammed, Kesego Tapela, Nelson Kibinge, Abdoulaye B Diallo, Frederick Kumi-Ansah, Theophilus Odoom, Oliver D Boakyey, Emmanuella Amoakoa, Abdul-Karim Abass, Samuel Kaba Akoriya, Frederick Tei-Maya, Lucas N. Amenga-Etego, Dam Kenneth Mibut, Yaw Bediako, Benjamin Demah Nuertey, Gordon A Awandare, Peter K Quashie, Gordon A Awandare, Yaw Bediako |
| EPI_ISL_1257877, EPI_ISL_1257878, EPI_ISL_1257879, EPI_ISL_1257880, EPI_ISL_1257881                                                                                                                                                                                                                                                                                                                                                                                                                                                                                                                                                                                                                                                                                                                                                                                                                                                                                                                                                                                                                                                                              | see above | Centre Pasteur du Cameroun                                                                                | Institut Pasteur de Dakar                                                                                                   | Njoum Richard, Diagne Moussa Moïse, Dia Ndongo, Diallo Amadou, Sankhe Safietou, Diop Mamadou, Loucoubar Cheikh, Elisabeth Carniel, Faye Ousmane, Sall Amadou Alpha                                                                                                                                                                                                                                                                                                                                           |
| EPI_ISL_1257882, EPI_ISL_1257883, EPI_ISL_1257884, EPI_ISL_1257885, EPI_ISL_1257886, EPI_ISL_1257887, EPI_ISL_1257888                                                                                                                                                                                                                                                                                                                                                                                                                                                                                                                                                                                                                                                                                                                                                                                                                                                                                                                                                                                                                                            | see above | Hopital Général de Douala                                                                                 | Institut Pasteur de Dakar                                                                                                   | Njoum Richard, Diagne Moussa Moïse, Dia Ndongo, Diallo Amadou, Sankhe Safietou, Diop Mamadou, Loucoubar Cheikh, Elisabeth Carniel, Faye Ousmane, Sall Amadou Alpha                                                                                                                                                                                                                                                                                                                                           |
| EPI_ISL_1257889, EPI_ISL_1257890, EPI_ISL_1257891, EPI_ISL_1257892                                                                                                                                                                                                                                                                                                                                                                                                                                                                                                                                                                                                                                                                                                                                                                                                                                                                                                                                                                                                                                                                                               | see above | Hopital Laquintinie de Douala                                                                             | Institut Pasteur de Dakar                                                                                                   | Njoum Richard, Diagne Moussa Moïse, Dia Ndongo, Diallo Amadou, Sankhe Safietou, Diop Mamadou, Loucoubar Cheikh, Elisabeth Carniel, Faye Ousmane, Sall Amadou Alpha                                                                                                                                                                                                                                                                                                                                           |
| EPI_ISL_1257893                                                                                                                                                                                                                                                                                                                                                                                                                                                                                                                                                                                                                                                                                                                                                                                                                                                                                                                                                                                                                                                                                                                                                  | see above | Laboratoire de Référence de la TB Douala                                                                  | Institut Pasteur de Dakar                                                                                                   | Njoum Richard, Diagne Moussa Moïse, Dia Ndongo, Diallo Amadou, Sankhe Safietou, Diop Mamadou, Loucoubar Cheikh, Elisabeth Carniel, Faye Ousmane, Sall Amadou Alpha                                                                                                                                                                                                                                                                                                                                           |
| EPI_ISL_1259284, EPI_ISL_1259285, EPI_ISL_1259286, EPI_ISL_1259287, EPI_ISL_1259288, EPI_ISL_1259289, EPI_ISL_1259290, EPI_ISL_1259291, EPI_ISL_1259292, EPI_ISL_1259293, EPI_ISL_1259294, EPI_ISL_1259295                                                                                                                                                                                                                                                                                                                                                                                                                                                                                                                                                                                                                                                                                                                                                                                                                                                                                                                                                       | see above | Hopital                                                                                                   | National Reference Center for Viruses of Respiratory Infections, Institut Pasteur, Paris                                    | Marion Barbet, Sylvie Behillil, Méline Bizard, Angela Brisebarre, Camille Capel, Etienne Simon-Lorière, Vincent Enouf, Maud Vanpeene, Sylvie van der Werf, Combe Patrice                                                                                                                                                                                                                                                                                                                                     |
| EPI_ISL_1261702, EPI_ISL_1261703, EPI_ISL_1261707, EPI_ISL_1261709, EPI_ISL_1261710, EPI_ISL_1261711, EPI_ISL_1261714, EPI_ISL_1261716, EPI_ISL_1261717, EPI_ISL_1261718, EPI_ISL_1261721, EPI_ISL_1261722, EPI_ISL_1261723, EPI_ISL_1261724, EPI_ISL_1261725, EPI_ISL_1261727, EPI_ISL_1261728, EPI_ISL_1261729, EPI_ISL_1261732, EPI_ISL_1261733, EPI_ISL_1261734, EPI_ISL_1261738, EPI_ISL_1261739, EPI_ISL_1261740, EPI_ISL_1261741, EPI_ISL_1261742, EPI_ISL_1261743, EPI_ISL_1261744, EPI_ISL_1261747, EPI_ISL_1261748, EPI_ISL_1261749, EPI_ISL_1261750, EPI_ISL_1261754, EPI_ISL_1261755, EPI_ISL_1261756, EPI_ISL_1261757, EPI_ISL_1261758, EPI_ISL_1261759, EPI_ISL_1261760, EPI_ISL_1261761, EPI_ISL_1261762, EPI_ISL_1261763, EPI_ISL_1261764, EPI_ISL_1261765, EPI_ISL_1261766, EPI_ISL_1261767, EPI_ISL_1261768, EPI_ISL_1261769, EPI_ISL_1261770, EPI_ISL_1261771, EPI_ISL_1261772, EPI_ISL_1261773, EPI_ISL_1261774                                                                                                                                                                                                                              | see above | Iressel Genomics lab                                                                                      | IRÉSSEF                                                                                                                     | Souleymane MBOUP, Abdou PADANE, Abdoulie KANTEH, Abdul Karim SESAY, Khadim GUEYE, Papa Alassane DIAW, Birahim Piere NDIAYE, Barada CISSE, Aminata MBOUP, Moustapha MBOW, Ndeye Coumba Toure KANE, Nafisatou LEYE, Gora LO, Ambroise AHOUIDI, Astou Gaye GAYE, Aminata DIA, Yacine DIA                                                                                                                                                                                                                        |
| EPI_ISL_1265757, EPI_ISL_1265820, EPI_ISL_1265821, EPI_ISL_1265822, EPI_ISL_1265823, EPI_ISL_1265824                                                                                                                                                                                                                                                                                                                                                                                                                                                                                                                                                                                                                                                                                                                                                                                                                                                                                                                                                                                                                                                             | see above | GHE REUNION                                                                                               | CNR Virus des Infections Respiratoires - France SUD                                                                         | Antonin Bal, Gregory Destras, Gwendolyne Burfin, Hadrien Regue, Quentin Semanas, Martine Valette, Bruno Lina, Laurence Josset                                                                                                                                                                                                                                                                                                                                                                                |
| EPI_ISL_1265825, EPI_ISL_1265826, EPI_ISL_1265834                                                                                                                                                                                                                                                                                                                                                                                                                                                                                                                                                                                                                                                                                                                                                                                                                                                                                                                                                                                                                                                                                                                | see above | CHU REUNION                                                                                               | CNR Virus des Infections Respiratoires - France SUD                                                                         | Antonin Bal, Gregory Destras, Gwendolyne Burfin, Hadrien Regue, Quentin Semanas, Martine Valette, Bruno Lina, Laurence Josset                                                                                                                                                                                                                                                                                                                                                                                |
| EPI_ISL_1265836, EPI_ISL_1265837, EPI_ISL_1265838                                                                                                                                                                                                                                                                                                                                                                                                                                                                                                                                                                                                                                                                                                                                                                                                                                                                                                                                                                                                                                                                                                                | see above | GHE REUNION                                                                                               | CNR Virus des Infections Respiratoires - France SUD                                                                         | Antonin Bal, Gregory Destras, Gwendolyne Burfin, Hadrien Regue, Quentin Semanas, Martine Valette, Bruno Lina, Laurence Josset                                                                                                                                                                                                                                                                                                                                                                                |
| EPI_ISL_1265839, EPI_ISL_1265840, EPI_ISL_1265841                                                                                                                                                                                                                                                                                                                                                                                                                                                                                                                                                                                                                                                                                                                                                                                                                                                                                                                                                                                                                                                                                                                | see above | CHU REUNION                                                                                               | CNR Virus des Infections Respiratoires - France SUD                                                                         | Antonin Bal, Gregory Destras, Gwendolyne Burfin, Hadrien Regue, Quentin Semanas, Martine Valette, Bruno Lina, Laurence Josset                                                                                                                                                                                                                                                                                                                                                                                |
| EPI_ISL_1265849, EPI_ISL_1265850                                                                                                                                                                                                                                                                                                                                                                                                                                                                                                                                                                                                                                                                                                                                                                                                                                                                                                                                                                                                                                                                                                                                 | see above | GHE REUNION                                                                                               | CNR Virus des Infections Respiratoires - France SUD                                                                         | Antonin Bal, Gregory Destras, Gwendolyne Burfin, Hadrien Regue, Quentin Semanas, Martine Valette, Bruno Lina, Laurence Josset                                                                                                                                                                                                                                                                                                                                                                                |
| EPI_ISL_1265851, EPI_ISL_1265852                                                                                                                                                                                                                                                                                                                                                                                                                                                                                                                                                                                                                                                                                                                                                                                                                                                                                                                                                                                                                                                                                                                                 | see above | CHU REUNION                                                                                               | CNR Virus des Infections Respiratoires - France SUD                                                                         | Antonin Bal, Gregory Destras, Gwendolyne Burfin, Hadrien Regue, Quentin Semanas, Martine Valette, Bruno Lina, Laurence Josset                                                                                                                                                                                                                                                                                                                                                                                |
| EPI_ISL_1272300, EPI_ISL_1272302, EPI_ISL_1272303, EPI_ISL_1272304, EPI_ISL_1272305, EPI_ISL_1272306, EPI_ISL_1272308, EPI_ISL_1272309                                                                                                                                                                                                                                                                                                                                                                                                                                                                                                                                                                                                                                                                                                                                                                                                                                                                                                                                                                                                                           | see above | NHLS Universitas Academic                                                                                 | UFS Virology                                                                                                                | PA Bester, MM Nyaga, P Nthiga, MT Mogotsi, Emmanuel Ogunbayo, D Goedhals, T de Oliveira                                                                                                                                                                                                                                                                                                                                                                                                                      |
| EPI_ISL_1273396, EPI_ISL_1273397, EPI_ISL_1273398, EPI_ISL_1273399, EPI_ISL_1273400, EPI_ISL_1273401, EPI_ISL_1273402, EPI_ISL_1273403, EPI_ISL_1273404, EPI_ISL_1273405, EPI_ISL_1273406, EPI_ISL_1273407, EPI_ISL_1273408                                                                                                                                                                                                                                                                                                                                                                                                                                                                                                                                                                                                                                                                                                                                                                                                                                                                                                                                      | see above | National Reference Laboratory - Ministry of Health Maseru Lesotho                                         | National Institute for Communicable Diseases of the National Health Laboratory Service                                      | Gorova V, Mathabo M, Mooko M, Banda R, Amoako DG, Scheepers C, Mohale T, Ntuli N, Mahlangu B, Ismail A, Bhiman JN                                                                                                                                                                                                                                                                                                                                                                                            |
| EPI_ISL_1299496, EPI_ISL_1299499                                                                                                                                                                                                                                                                                                                                                                                                                                                                                                                                                                                                                                                                                                                                                                                                                                                                                                                                                                                                                                                                                                                                 | see above | Centre Hospitalo Universitaire Sourou Sanou                                                               | Centre Muraz                                                                                                                | Arsène Zongo, Ange Badjo, Yacouba Sawadogo, Jasmin Schlotterbeck, Essia Belarbi, Grit Schubert, Fabian Leendertz, Abdoul-Salam Ouedraogo, Thérèse Kagone, Arsène Somé, Firmin Kaboré, Arnel Poda, Soumeya Ouangraoua                                                                                                                                                                                                                                                                                         |
| EPI_ISL_1300663, EPI_ISL_1301734, EPI_ISL_1301735, EPI_ISL_1301736, EPI_ISL_1301737, EPI_ISL_1301738, EPI_ISL_1301739, EPI_ISL_1301740, EPI_ISL_1301741, EPI_ISL_1301742, EPI_ISL_1301743, EPI_ISL_1301744, EPI_ISL_1301745, EPI_ISL_1301746, EPI_ISL_1301747, EPI_ISL_1301748, EPI_ISL_1301749, EPI_ISL_1301750, EPI_ISL_1301751, EPI_ISL_1301752, EPI_ISL_1301753, EPI_ISL_1301754, EPI_ISL_1301755, EPI_ISL_1301756, EPI_ISL_1301757, EPI_ISL_1301758, EPI_ISL_1301759, EPI_ISL_1301760, EPI_ISL_1301764, EPI_ISL_1301771, EPI_ISL_1301772, EPI_ISL_1301773, EPI_ISL_1301774, EPI_ISL_1301775, EPI_ISL_1301776, EPI_ISL_1301777, EPI_ISL_1301778, EPI_ISL_1301779, EPI_ISL_1301780, EPI_ISL_1301781, EPI_ISL_1301782, EPI_ISL_1301783, EPI_ISL_1301784, EPI_ISL_1301785, EPI_ISL_1301786, EPI_ISL_1301787, EPI_ISL_1301788, EPI_ISL_1301789, EPI_ISL_1301790, EPI_ISL_1301791, EPI_ISL_1301792, EPI_ISL_1301793, EPI_ISL_1301794, EPI_ISL_1301795, EPI_ISL_1301796, EPI_ISL_1301797, EPI_ISL_1301800, EPI_ISL_1301801, EPI_ISL_1301802, EPI_ISL_1301803                                                                                                       | see above | Nucleic Acid Testing, National Reference Laboratory                                                       | GIGA Medical Genomics                                                                                                       | Yvan Butera, Keith Durkin, Maria Artesi, Bouchra Boujemla, Robert Rutayisire, Patrick Tuyisenge, Esperence Umumararungu, Sébastien Bontems, Marie-Pierre Hayette, Nathalie Renotte, Swaibu Gatara, Jacob Souppgui, Sabin Nsanzimana, Vincent Bours, Léon Mutesa                                                                                                                                                                                                                                              |
| EPI_ISL_1301887, EPI_ISL_1301899, EPI_ISL_1301900                                                                                                                                                                                                                                                                                                                                                                                                                                                                                                                                                                                                                                                                                                                                                                                                                                                                                                                                                                                                                                                                                                                | see above | Outre mer                                                                                                 | National Reference Center for Viruses of Respiratory Infections, Institut Pasteur, Paris                                    | Marion Barbet, Sylvie Behillil, Méline Bizard, Angela Brisebarre, Camille Capel, Louise Lefrançois, Etienne Simon-Lorière, Vincent Enouf, Maud Vanpeene, Sylvie van der Werf, Combe Patrice                                                                                                                                                                                                                                                                                                                  |
| EPI_ISL_1302666, EPI_ISL_1302667, EPI_ISL_1302675, EPI_ISL_1302676, EPI_ISL_1302677, EPI_ISL_1302678, EPI_ISL_1302679, EPI_ISL_1302680                                                                                                                                                                                                                                                                                                                                                                                                                                                                                                                                                                                                                                                                                                                                                                                                                                                                                                                                                                                                                           | see above | Nucleic Acid Testing, National Reference Laboratory                                                       | GIGA Medical Genomics                                                                                                       | Yvan Butera, Keith Durkin, Maria Artesi, Bouchra Boujemla, Robert Rutayisire, Patrick Tuyisenge, Esperence Umumararungu, Sébastien Bontems, Marie-Pierre Hayette, Nathalie Renotte, Swaibu Gatara, Jacob Souppgui, Sabin Nsanzimana, Vincent Bours, Léon Mutesa                                                                                                                                                                                                                                              |
| EPI_ISL_1323658, EPI_ISL_1323659, EPI_ISL_1323660, EPI_ISL_1323661, EPI_ISL_1323662, EPI_ISL_1323663                                                                                                                                                                                                                                                                                                                                                                                                                                                                                                                                                                                                                                                                                                                                                                                                                                                                                                                                                                                                                                                             | see above | KEMRI-Wellcome Trust Research Programme/KEMRI-CGMR-C Kilifi                                               | KEMRI-Wellcome Trust Research Programme/KEMRI-CGMR-C Kilifi                                                                 | Githinji G.                                                                                                                                                                                                                                                                                                                                                                                                                                                                                                  |
| EPI_ISL_1324128                                                                                                                                                                                                                                                                                                                                                                                                                                                                                                                                                                                                                                                                                                                                                                                                                                                                                                                                                                                                                                                                                                                                                  | see above | UW Virology Lab                                                                                           | UW Virology Lab                                                                                                             | Pavitra Roychoudhury, Hong Xie, Lasata Shrestha, Shah Mohamed Bakhsh, Michelle Lin, Margaret Mills, Noah Baker, Sean Ellis, Saraswathi Sathees, Meei-Li Huang, Keith R Jerome, Alexander Greninger                                                                                                                                                                                                                                                                                                           |
| EPI_ISL_1336529, EPI_ISL_1336530, EPI_ISL_1336531, EPI_ISL_1336532, EPI_ISL_1336574, EPI_ISL_1336575, EPI_ISL_1336576, EPI_ISL_1336577, EPI_ISL_1336578, EPI_ISL_1336580, EPI_ISL_1336581, EPI_ISL_1336582, EPI_ISL_1336583, EPI_ISL_1336584, EPI_ISL_1336585, EPI_ISL_1336586, EPI_ISL_1336587, EPI_ISL_1336588, EPI_ISL_1336589                                                                                                                                                                                                                                                                                                                                                                                                                                                                                                                                                                                                                                                                                                                                                                                                                                | see above | CHR LA REUNION FELIX GUYON                                                                                | CNR Virus des Infections Respiratoires - France SUD                                                                         | Antonin Bal, Gregory Destras, Gwendolyne Burfin, Hadrien Regue, Quentin Semanas, Martine Valette, Bruno Lina, Laurence Josset                                                                                                                                                                                                                                                                                                                                                                                |
| EPI_ISL_1347878, EPI_ISL_1347879, EPI_ISL_1347880, EPI_ISL_1347881, EPI_ISL_1347882, EPI_ISL_1347883, EPI_ISL_1347884, EPI_ISL_1347885, EPI_ISL_1347886, EPI_ISL_1347887, EPI_ISL_1347888, EPI_ISL_1347889, EPI_ISL_1347890, EPI_ISL_1347891, EPI_ISL_1347892, EPI_ISL_1347893, EPI_ISL_1347894, EPI_ISL_1347895, EPI_ISL_1347896, EPI_ISL_1347897, EPI_ISL_1347898, EPI_ISL_1347899, EPI_ISL_1347900, EPI_ISL_1347901, EPI_ISL_1347902, EPI_ISL_1347903, EPI_ISL_1347904, EPI_ISL_1347905, EPI_ISL_1347906, EPI_ISL_1347907, EPI_ISL_1347908, EPI_ISL_1347909, EPI_ISL_1347910, EPI_ISL_1347911, EPI_ISL_1347912, EPI_ISL_1347913, EPI_ISL_1347914, EPI_ISL_1347915, EPI_ISL_1347916, EPI_ISL_1347917, EPI_ISL_1347918, EPI_ISL_1347919, EPI_ISL_1347920, EPI_ISL_1347921, EPI_ISL_1347922, EPI_ISL_1347923, EPI_ISL_1347924, EPI_ISL_1347925, EPI_ISL_1347926, EPI_ISL_1347927, EPI_ISL_1347928, EPI_ISL_1347929, EPI_ISL_1347930, EPI_ISL_1347931, EPI_ISL_1347932, EPI_ISL_1347938, EPI_ISL_1347939, EPI_ISL_1347940, EPI_ISL_1347941, EPI_ISL_1347942, EPI_ISL_1347943, EPI_ISL_1347944, EPI_ISL_1347945, EPI_ISL_1347946, EPI_ISL_1347947, EPI_ISL_1347948 | see above | Instituto Nacional de Investigação em Saúde                                                               | KRISP, KZN Research Innovation and Sequencing Platform                                                                      | Morais J, Neto Z, Afonso P, Miranda J, David K, Inglês L, Pereira A, Paulo A Carralero RR Paixão JP, Freitas RH, Mufinda M, Lutucuta S, Giandhari J.                                                                                                                                                                                                                                                                                                                                                         |

|                                                                                                                                                                                                                                                                                                                                                                                                                                                                                                                                                                                                                                                                                                                                                                                                                                                                                                                                                                                                                                                                                                                                                                                                                                                                                                                                                                                                                                                                                                                                                                                                                                                                                                                                                                                                                                                                                                                                                                                                                                                                                                                                                                                                                                                                                                                                                                                                                                                                                                                                                                                                                                                                                                                                                            |           |                                                                                                     |                                                                                                                                                 |                                                                                                                                                                                                                                                                                                                                                                                             |
|------------------------------------------------------------------------------------------------------------------------------------------------------------------------------------------------------------------------------------------------------------------------------------------------------------------------------------------------------------------------------------------------------------------------------------------------------------------------------------------------------------------------------------------------------------------------------------------------------------------------------------------------------------------------------------------------------------------------------------------------------------------------------------------------------------------------------------------------------------------------------------------------------------------------------------------------------------------------------------------------------------------------------------------------------------------------------------------------------------------------------------------------------------------------------------------------------------------------------------------------------------------------------------------------------------------------------------------------------------------------------------------------------------------------------------------------------------------------------------------------------------------------------------------------------------------------------------------------------------------------------------------------------------------------------------------------------------------------------------------------------------------------------------------------------------------------------------------------------------------------------------------------------------------------------------------------------------------------------------------------------------------------------------------------------------------------------------------------------------------------------------------------------------------------------------------------------------------------------------------------------------------------------------------------------------------------------------------------------------------------------------------------------------------------------------------------------------------------------------------------------------------------------------------------------------------------------------------------------------------------------------------------------------------------------------------------------------------------------------------------------------|-----------|-----------------------------------------------------------------------------------------------------|-------------------------------------------------------------------------------------------------------------------------------------------------|---------------------------------------------------------------------------------------------------------------------------------------------------------------------------------------------------------------------------------------------------------------------------------------------------------------------------------------------------------------------------------------------|
| EPI_ISL_1365022, EPI_ISL_1365023, EPI_ISL_1365024, EPI_ISL_1365025, EPI_ISL_1365026, EPI_ISL_1365027, EPI_ISL_1365028, EPI_ISL_1365029, EPI_ISL_1365030, EPI_ISL_1365031, EPI_ISL_1365032, EPI_ISL_1365033, EPI_ISL_1365034, EPI_ISL_1365035                                                                                                                                                                                                                                                                                                                                                                                                                                                                                                                                                                                                                                                                                                                                                                                                                                                                                                                                                                                                                                                                                                                                                                                                                                                                                                                                                                                                                                                                                                                                                                                                                                                                                                                                                                                                                                                                                                                                                                                                                                                                                                                                                                                                                                                                                                                                                                                                                                                                                                               | see above | Molecular diagnostic unit for viral haemorrhagic fevers and emerging viruses, Bouaké CHU Laboratory | Molecular diagnostic unit for viral haemorrhagic fevers and emerging viruses, Bouaké CHU Laboratory                                             | Chantal Akoua-Koffi, Diané Bamourou, Etilé Aneh, Oby Wayoro, Safiatou Karidioula, Adjaratou Traoré, Soundélé Maïté, Monemo Pacome, Coulibaly Mbegan, Bamba Fatoumata Touré, Kra Ouffoué, Grit Schubert, Essia Belarbi, Fabian Leendertz                                                                                                                                                     |
| EPI_ISL_1366754, EPI_ISL_1366755, EPI_ISL_1366756, EPI_ISL_1366757, EPI_ISL_1366758, EPI_ISL_1366759, EPI_ISL_1366760, EPI_ISL_1366761, EPI_ISL_1366762, EPI_ISL_1366763, EPI_ISL_1366764, EPI_ISL_1366765, EPI_ISL_1366766, EPI_ISL_1366767, EPI_ISL_1366768, EPI_ISL_1366769, EPI_ISL_1366770, EPI_ISL_1366771, EPI_ISL_1366772, EPI_ISL_1366773, EPI_ISL_1366774, EPI_ISL_1366775, EPI_ISL_1366776, EPI_ISL_1366777, EPI_ISL_1366778, EPI_ISL_1366779, EPI_ISL_1366780, EPI_ISL_1366781, EPI_ISL_1366782, EPI_ISL_1366783, EPI_ISL_1366784, EPI_ISL_1366785, EPI_ISL_1366786, EPI_ISL_1366787, EPI_ISL_1366788, EPI_ISL_1366789, EPI_ISL_1366790, EPI_ISL_1366791, EPI_ISL_1366792, EPI_ISL_1366793, EPI_ISL_1366794, EPI_ISL_1366795, EPI_ISL_1366796, EPI_ISL_1366797, EPI_ISL_1366798, EPI_ISL_1366799, EPI_ISL_1366800, EPI_ISL_1366801, EPI_ISL_1366802, EPI_ISL_1366803, EPI_ISL_1366804, EPI_ISL_1366805, EPI_ISL_1366806, EPI_ISL_1366807, EPI_ISL_1366808, EPI_ISL_1366809, EPI_ISL_1366810, EPI_ISL_1366811, EPI_ISL_1366812, EPI_ISL_1366813, EPI_ISL_1366814, EPI_ISL_1366815, EPI_ISL_1366816, EPI_ISL_1366817, EPI_ISL_1366818, EPI_ISL_1366819, EPI_ISL_1366820, EPI_ISL_1366821, EPI_ISL_1366822, EPI_ISL_1366823, EPI_ISL_1366824, EPI_ISL_1366825, EPI_ISL_1366826, EPI_ISL_1366827, EPI_ISL_1366828, EPI_ISL_1366829, EPI_ISL_1366830, EPI_ISL_1366831, EPI_ISL_1366832, EPI_ISL_1366833, EPI_ISL_1366834, EPI_ISL_1366835, EPI_ISL_1366836, EPI_ISL_1366837, EPI_ISL_1366838, EPI_ISL_1366839, EPI_ISL_1366840, EPI_ISL_1366841, EPI_ISL_1366842, EPI_ISL_1366843, EPI_ISL_1366844, EPI_ISL_1366845, EPI_ISL_1366846, EPI_ISL_1366847, EPI_ISL_1366848, EPI_ISL_1366849, EPI_ISL_1366850, EPI_ISL_1366851, EPI_ISL_1366852, EPI_ISL_1366853, EPI_ISL_1366854, EPI_ISL_1366855, EPI_ISL_1366856, EPI_ISL_1366857, EPI_ISL_1366858, EPI_ISL_1366859, EPI_ISL_1366860, EPI_ISL_1366861, EPI_ISL_1366862, EPI_ISL_1366863, EPI_ISL_1366864, EPI_ISL_1366865, EPI_ISL_1366866, EPI_ISL_1366867, EPI_ISL_1366868, EPI_ISL_1366869, EPI_ISL_1366870, EPI_ISL_1366871, EPI_ISL_1366872, EPI_ISL_1366873, EPI_ISL_1366874, EPI_ISL_1366875, EPI_ISL_1366876, EPI_ISL_1366877, EPI_ISL_1366878, EPI_ISL_1366879, EPI_ISL_1366880, EPI_ISL_1366881, EPI_ISL_1366882, EPI_ISL_1366883, EPI_ISL_1366884, EPI_ISL_1366885, EPI_ISL_1366886, EPI_ISL_1366887, EPI_ISL_1366888                                                                                                                                                                                                                                                                                                                                                                      | see above | National Health Laboratory Service, South Africa                                                    | KRISP, KZN Research Innovation and Sequencing Platform                                                                                          | Laguda-Akingba O, Giandhari J, Pillay S, Lessells R, Mdlalose K, York D, Khan S, Emmanuel SJ, Tegally H, Wilkinson E, de Oliveira T                                                                                                                                                                                                                                                         |
| EPI_ISL_1367677, EPI_ISL_1367678, EPI_ISL_1367680, EPI_ISL_1367682, EPI_ISL_1367683, EPI_ISL_1367685, EPI_ISL_1367686, EPI_ISL_1367688, EPI_ISL_1367689, EPI_ISL_1367691, EPI_ISL_1367692, EPI_ISL_1367694, EPI_ISL_1367695, EPI_ISL_1367698, EPI_ISL_1367700, EPI_ISL_1367701, EPI_ISL_1367702, EPI_ISL_1367704                                                                                                                                                                                                                                                                                                                                                                                                                                                                                                                                                                                                                                                                                                                                                                                                                                                                                                                                                                                                                                                                                                                                                                                                                                                                                                                                                                                                                                                                                                                                                                                                                                                                                                                                                                                                                                                                                                                                                                                                                                                                                                                                                                                                                                                                                                                                                                                                                                           | see above | Molecular diagnostic unit for viral haemorrhagic fevers and emerging viruses, Bouaké CHU Laboratory | Molecular diagnostic unit for viral haemorrhagic fevers and emerging viruses, Bouaké CHU Laboratory                                             | Chantal Akoua-Koffi, Diané Bamourou, Etilé Aneh, Oby Wayoro, Safiatou Karidioula, Adjaratou Traoré, Soundélé Maïté, Monemo Pacome, Coulibaly Mbegan, Bamba Fatoumata Touré, Kra Ouffoué, Grit Schubert, Essia Belarbi, Fabian Leendertz                                                                                                                                                     |
| EPI_ISL_1371761                                                                                                                                                                                                                                                                                                                                                                                                                                                                                                                                                                                                                                                                                                                                                                                                                                                                                                                                                                                                                                                                                                                                                                                                                                                                                                                                                                                                                                                                                                                                                                                                                                                                                                                                                                                                                                                                                                                                                                                                                                                                                                                                                                                                                                                                                                                                                                                                                                                                                                                                                                                                                                                                                                                                            |           | CHR LA REUNION FELIX GUYON                                                                          | CNR Virus des Infections Respiratoires - France SUD                                                                                             | Antonin Bal, Gregory Destras, Gwendolyne Burfin, Hadrien Regue, Quentin Semanas, Martine Valette, Bruno Liza, Laurence Josset                                                                                                                                                                                                                                                               |
| EPI_ISL_1371906, EPI_ISL_1371907, EPI_ISL_1371908, EPI_ISL_1371909, EPI_ISL_1371910, EPI_ISL_1371911, EPI_ISL_1371912, EPI_ISL_1371913, EPI_ISL_1371914, EPI_ISL_1371915, EPI_ISL_1371916, EPI_ISL_1371917, EPI_ISL_1371918, EPI_ISL_1371919, EPI_ISL_1371920, EPI_ISL_1371921, EPI_ISL_1371922, EPI_ISL_1371923, EPI_ISL_1371924, EPI_ISL_1371925, EPI_ISL_1371926, EPI_ISL_1371927, EPI_ISL_1371928, EPI_ISL_1371929, EPI_ISL_1371930, EPI_ISL_1371931, EPI_ISL_1371932, EPI_ISL_1371933, EPI_ISL_1371934, EPI_ISL_1371935, EPI_ISL_1371936, EPI_ISL_1371937, EPI_ISL_1371938, EPI_ISL_1371939, EPI_ISL_1371940, EPI_ISL_1371941, EPI_ISL_1371942, EPI_ISL_1371943, EPI_ISL_1371944, EPI_ISL_1371945, EPI_ISL_1371946, EPI_ISL_1371947, EPI_ISL_1371948, EPI_ISL_1371949, EPI_ISL_1371950, EPI_ISL_1371951, EPI_ISL_1371952, EPI_ISL_1371953, EPI_ISL_1371954, EPI_ISL_1371955, EPI_ISL_1371956, EPI_ISL_1371957, EPI_ISL_1371958, EPI_ISL_1371959, EPI_ISL_1371960, EPI_ISL_1371961, EPI_ISL_1371962, EPI_ISL_1371963, EPI_ISL_1371964, EPI_ISL_1371965, EPI_ISL_1371966, EPI_ISL_1371967, EPI_ISL_1371968, EPI_ISL_1371969, EPI_ISL_1371970, EPI_ISL_1371971, EPI_ISL_1371972, EPI_ISL_1371973, EPI_ISL_1371974, EPI_ISL_1371975, EPI_ISL_1371976, EPI_ISL_1371977, EPI_ISL_1371978, EPI_ISL_1371979, EPI_ISL_1371980, EPI_ISL_1371981, EPI_ISL_1371982, EPI_ISL_1371983, EPI_ISL_1371984, EPI_ISL_1371985, EPI_ISL_1371986, EPI_ISL_1371987, EPI_ISL_1371988, EPI_ISL_1371989, EPI_ISL_1371990, EPI_ISL_1371991, EPI_ISL_1371992, EPI_ISL_1371993, EPI_ISL_1371994, EPI_ISL_1371995, EPI_ISL_1371996, EPI_ISL_1371997, EPI_ISL_1371998, EPI_ISL_1371999, EPI_ISL_1372000, EPI_ISL_1372001, EPI_ISL_1372002, EPI_ISL_1372003, EPI_ISL_1372004, EPI_ISL_1372005, EPI_ISL_1372006                                                                                                                                                                                                                                                                                                                                                                                                                                                                                                                                                                                                                                                                                                                                                                                                                                                                                                                                                                        | see above | National Health Laboratory Service, South Africa                                                    | KRISP, KZN Research Innovation and Sequencing Platform                                                                                          | Giandhari J, Pillay S, Maslo K, Sitharam L, Lessells R, Mdlalose K, York D, Khan S, Emmanuel SJ, Tegally H, Wilkinson E, de Oliveira T                                                                                                                                                                                                                                                      |
| EPI_ISL_1381741                                                                                                                                                                                                                                                                                                                                                                                                                                                                                                                                                                                                                                                                                                                                                                                                                                                                                                                                                                                                                                                                                                                                                                                                                                                                                                                                                                                                                                                                                                                                                                                                                                                                                                                                                                                                                                                                                                                                                                                                                                                                                                                                                                                                                                                                                                                                                                                                                                                                                                                                                                                                                                                                                                                                            |           | Nigeria Centre For Disease Control                                                                  | National reference Laboratory, NCDC, Gaduwa, Abuja                                                                                              | Dr Ndodo Nnaemeka, Olusola Anuoluwapo Akanbi, Chimaobi Chukwu, Dr Omoare Adesuyi, Anthony Ahumibe, Catherine Okoi, Nwando Mba, Dr Chikwe Ihekweazu                                                                                                                                                                                                                                          |
| EPI_ISL_1381742                                                                                                                                                                                                                                                                                                                                                                                                                                                                                                                                                                                                                                                                                                                                                                                                                                                                                                                                                                                                                                                                                                                                                                                                                                                                                                                                                                                                                                                                                                                                                                                                                                                                                                                                                                                                                                                                                                                                                                                                                                                                                                                                                                                                                                                                                                                                                                                                                                                                                                                                                                                                                                                                                                                                            |           | Nigeria Centre For Disease Control                                                                  | National reference Laboratory, NCDC, Gaduwa, Abuja                                                                                              | Dr Ndodo Nnaemeka, Olusola Anuoluwapo Akanbi, Chimaobi Chukwu, Dr Omoare Adesuyi, Anthony Ahumibe, Catherine Okoi, Nwando Mba, Dr Chikwe Ihekweazu                                                                                                                                                                                                                                          |
| EPI_ISL_1381743, EPI_ISL_1381744, EPI_ISL_1381745, EPI_ISL_1381746, EPI_ISL_1381747, EPI_ISL_1381748, EPI_ISL_1381813, EPI_ISL_1381814, EPI_ISL_1381815, EPI_ISL_1381832                                                                                                                                                                                                                                                                                                                                                                                                                                                                                                                                                                                                                                                                                                                                                                                                                                                                                                                                                                                                                                                                                                                                                                                                                                                                                                                                                                                                                                                                                                                                                                                                                                                                                                                                                                                                                                                                                                                                                                                                                                                                                                                                                                                                                                                                                                                                                                                                                                                                                                                                                                                   |           | Nigeria Centre For Disease Control                                                                  | National reference Laboratory, NCDC, Gaduwa, Abuja                                                                                              | Dr Ndodo Nnaemeka, Olusola Anuoluwapo Akanbi, Chimaobi Chukwu, Dr Omoare Adesuyi, Anthony Ahumibe, Catherine Okoi, Naidoo Dhamari, Nwando Mba, Dr Chikwe Ihekweazu                                                                                                                                                                                                                          |
| EPI_ISL_1407095, EPI_ISL_1407096, EPI_ISL_1407097, EPI_ISL_1407098, EPI_ISL_1407099, EPI_ISL_1407100, EPI_ISL_1407101, EPI_ISL_1407102, EPI_ISL_1407103, EPI_ISL_1407104, EPI_ISL_1407105, EPI_ISL_1407106, EPI_ISL_1407107, EPI_ISL_1407108, EPI_ISL_1407109, EPI_ISL_1407110, EPI_ISL_1407111, EPI_ISL_1407112, EPI_ISL_1407113, EPI_ISL_1407114, EPI_ISL_1407117, EPI_ISL_1407118, EPI_ISL_1407119, EPI_ISL_1407120, EPI_ISL_1407121, EPI_ISL_1407122, EPI_ISL_1407123, EPI_ISL_1407124, EPI_ISL_1407125, EPI_ISL_1407126, EPI_ISL_1407127, EPI_ISL_1407128, EPI_ISL_1407129, EPI_ISL_1407130, EPI_ISL_1407131, EPI_ISL_1407132, EPI_ISL_1407133, EPI_ISL_1407134, EPI_ISL_1407135, EPI_ISL_1407136, EPI_ISL_1407137, EPI_ISL_1407138, EPI_ISL_1407139, EPI_ISL_1407140, EPI_ISL_1407141, EPI_ISL_1407142, EPI_ISL_1407143, EPI_ISL_1407144, EPI_ISL_1407145, EPI_ISL_1407146, EPI_ISL_1407147, EPI_ISL_1407148, EPI_ISL_1407149, EPI_ISL_1407150, EPI_ISL_1407151, EPI_ISL_1407152, EPI_ISL_1407153, EPI_ISL_1407154, EPI_ISL_1407155, EPI_ISL_1407156, EPI_ISL_1407157, EPI_ISL_1407158, EPI_ISL_1407159, EPI_ISL_1407160, EPI_ISL_1407161, EPI_ISL_1407162, EPI_ISL_1407163, EPI_ISL_1407164, EPI_ISL_1407165, EPI_ISL_1407166, EPI_ISL_1407167, EPI_ISL_1407168, EPI_ISL_1407169, EPI_ISL_1407170, EPI_ISL_1407171, EPI_ISL_1407172, EPI_ISL_1407173, EPI_ISL_1407174, EPI_ISL_1407175, EPI_ISL_1407176, EPI_ISL_1407177, EPI_ISL_1407178, EPI_ISL_1407179, EPI_ISL_1407180, EPI_ISL_1407181, EPI_ISL_1407182, EPI_ISL_1407183, EPI_ISL_1407184, EPI_ISL_1407185, EPI_ISL_1407186, EPI_ISL_1407187, EPI_ISL_1407188, EPI_ISL_1407189, EPI_ISL_1407190, EPI_ISL_1407191, EPI_ISL_1407192, EPI_ISL_1407193, EPI_ISL_1407194, EPI_ISL_1407195, EPI_ISL_1407196, EPI_ISL_1407197, EPI_ISL_1407198, EPI_ISL_1407199, EPI_ISL_1407200, EPI_ISL_1407201, EPI_ISL_1407202, EPI_ISL_1407203, EPI_ISL_1407204, EPI_ISL_1407205, EPI_ISL_1407206, EPI_ISL_1407207, EPI_ISL_1407208, EPI_ISL_1407209, EPI_ISL_1407210, EPI_ISL_1407211, EPI_ISL_1407212, EPI_ISL_1407213, EPI_ISL_1407214, EPI_ISL_1407215, EPI_ISL_1407216, EPI_ISL_1407217, EPI_ISL_1407218, EPI_ISL_1407219, EPI_ISL_1407220, EPI_ISL_1407221, EPI_ISL_1407222, EPI_ISL_1407223, EPI_ISL_1407224, EPI_ISL_1407225, EPI_ISL_1407226, EPI_ISL_1407227, EPI_ISL_1407228, EPI_ISL_1407229, EPI_ISL_1407230, EPI_ISL_1407231, EPI_ISL_1407232, EPI_ISL_1407233, EPI_ISL_1407234, EPI_ISL_1407235, EPI_ISL_1407236, EPI_ISL_1407237, EPI_ISL_1407238, EPI_ISL_1407239, EPI_ISL_1407240, EPI_ISL_1407241, EPI_ISL_1407242, EPI_ISL_1407243, EPI_ISL_1407244, EPI_ISL_1407245, EPI_ISL_1407246, EPI_ISL_1407247, EPI_ISL_1407248, EPI_ISL_1407249, EPI_ISL_1407250, EPI_ISL_1407251, EPI_ISL_1407252 | see above | National HIV Reference Laboratory, Ministry of Health, Public Health Institute of Malawi            | KRISP, KZN Research Innovation and Sequencing Platform                                                                                          | Mvula B, Chilima B, Chiwuala M, Mwangomba W, Panja L, Kasambara W, Auld A, Kim L, Kampira E, Kaba M, Wadonda N, Maïda A, Giandhari J, Pillay S, Naidoo Y, Lessells R, Emmanuel SJ, Tegally H, Wilkinson E, de Oliveira T                                                                                                                                                                    |
| EPI_ISL_1440075, EPI_ISL_1440078, EPI_ISL_1440081, EPI_ISL_1440084, EPI_ISL_1440087, EPI_ISL_1440090, EPI_ISL_1440093, EPI_ISL_1440096, EPI_ISL_1440099, EPI_ISL_1440102, EPI_ISL_1440106, EPI_ISL_1440109, EPI_ISL_1440112, EPI_ISL_1440115, EPI_ISL_1440118, EPI_ISL_1440119, EPI_ISL_1440122, EPI_ISL_1440125, EPI_ISL_1440128                                                                                                                                                                                                                                                                                                                                                                                                                                                                                                                                                                                                                                                                                                                                                                                                                                                                                                                                                                                                                                                                                                                                                                                                                                                                                                                                                                                                                                                                                                                                                                                                                                                                                                                                                                                                                                                                                                                                                                                                                                                                                                                                                                                                                                                                                                                                                                                                                          | see above | KEMRI-Wellcome Trust Research Programme,Kilifi                                                      | KEMRI-Wellcome Trust Research Programme,Kilifi                                                                                                  | Githinji G.,Mohamed K.S.,deLaurent Z.,Mburu M.W.                                                                                                                                                                                                                                                                                                                                            |
| EPI_ISL_1469313, EPI_ISL_1469314, EPI_ISL_1469315, EPI_ISL_1469316, EPI_ISL_1469317, EPI_ISL_1469318, EPI_ISL_1469319, EPI_ISL_1469320, EPI_ISL_1469321, EPI_ISL_1469322, EPI_ISL_1469323, EPI_ISL_1469324, EPI_ISL_1469325                                                                                                                                                                                                                                                                                                                                                                                                                                                                                                                                                                                                                                                                                                                                                                                                                                                                                                                                                                                                                                                                                                                                                                                                                                                                                                                                                                                                                                                                                                                                                                                                                                                                                                                                                                                                                                                                                                                                                                                                                                                                                                                                                                                                                                                                                                                                                                                                                                                                                                                                | see above | MRC/UVRI & LSHTM Uganda Research Unit                                                               | Where sequence data have been generated and submitted to GISAID                                                                                 | Matthew Cotten, Dan Lule Bugembe, My V.T. Phan, Isaac Sseewanyana, Patrick Semanda, Susan Nabadda, Pontiano Kaleebu                                                                                                                                                                                                                                                                         |
| EPI_ISL_1498123                                                                                                                                                                                                                                                                                                                                                                                                                                                                                                                                                                                                                                                                                                                                                                                                                                                                                                                                                                                                                                                                                                                                                                                                                                                                                                                                                                                                                                                                                                                                                                                                                                                                                                                                                                                                                                                                                                                                                                                                                                                                                                                                                                                                                                                                                                                                                                                                                                                                                                                                                                                                                                                                                                                                            |           | National Reference Laboratory                                                                       | National Reference Laboratory                                                                                                                   | Enatha Mukantwari, Jeanne d'Arc Umuringa, Yvan Butera                                                                                                                                                                                                                                                                                                                                       |
| EPI_ISL_1498124                                                                                                                                                                                                                                                                                                                                                                                                                                                                                                                                                                                                                                                                                                                                                                                                                                                                                                                                                                                                                                                                                                                                                                                                                                                                                                                                                                                                                                                                                                                                                                                                                                                                                                                                                                                                                                                                                                                                                                                                                                                                                                                                                                                                                                                                                                                                                                                                                                                                                                                                                                                                                                                                                                                                            |           | National Reference Laboratory                                                                       | National Reference Laboratory                                                                                                                   | Enatha Mukantwari, Umuringa Jeanne d'Arc, Yvan Butera                                                                                                                                                                                                                                                                                                                                       |
| EPI_ISL_1500948, EPI_ISL_1501268                                                                                                                                                                                                                                                                                                                                                                                                                                                                                                                                                                                                                                                                                                                                                                                                                                                                                                                                                                                                                                                                                                                                                                                                                                                                                                                                                                                                                                                                                                                                                                                                                                                                                                                                                                                                                                                                                                                                                                                                                                                                                                                                                                                                                                                                                                                                                                                                                                                                                                                                                                                                                                                                                                                           |           | Institut National d'Hygiène (INH)                                                                   | Unité Mixte Internationale TransVIHMI (UMI 233 IRD - U1175 INSERM - Université de Montpellier)IRD (Institut de recherche pour le développement) | Mounerou SALOU, Christelle BUTEL, Wembo A. HALATOKO,Amivi EHLAN,Abia A. KONOU,Amivi EHLAN, Adodo SADJI, Kokou TEGUENI,Sidonie A.M.KAGNISSODE, Akoléé SILIADIN, Alassane OURO-MEDELI, Messanh DOUFFAN,Déléma MABA,Sika DOSSIM, Améyo DORKENOO, Mireille PRINCE-DAVID,Anoumou DAGNRA,Laetitia SERRANO,Ahidjo AYOUBA, Eric DELAPORTE, Martine PEETERS                                          |
| EPI_ISL_1502112                                                                                                                                                                                                                                                                                                                                                                                                                                                                                                                                                                                                                                                                                                                                                                                                                                                                                                                                                                                                                                                                                                                                                                                                                                                                                                                                                                                                                                                                                                                                                                                                                                                                                                                                                                                                                                                                                                                                                                                                                                                                                                                                                                                                                                                                                                                                                                                                                                                                                                                                                                                                                                                                                                                                            |           | Laboratoire Biolim/FSS/UL                                                                           | Unité Mixte Internationale TransVIHMI (UMI 233 IRD - U1175 INSERM - Université de Montpellier)IRD (Institut de recherche pour le développement) | Mounerou SALOU, Christelle BUTEL, Wembo A. HALATOKO,Amivi EHLAN,Abia A. KONOU,Issaka Maman,Syntiche DEVATCHAGNI Adodo SADJI, Kokou TEGUENI,Koku AGBODEKA, Sidonie A.M.KAGNISSODE, Akoléé SILIADIN, Alassane OURO-MEDELI, Messanh DOUFFAN,Déléma MABA,Sika DOSSIM, Améyo DORKENOO, Mireille PRINCE-DAVID,Anoumou DAGNRA,Laetitia SERRANO,Ahidjo AYOUBA, Eric DELAPORTE, Martine PEETERS      |
| EPI_ISL_1502567                                                                                                                                                                                                                                                                                                                                                                                                                                                                                                                                                                                                                                                                                                                                                                                                                                                                                                                                                                                                                                                                                                                                                                                                                                                                                                                                                                                                                                                                                                                                                                                                                                                                                                                                                                                                                                                                                                                                                                                                                                                                                                                                                                                                                                                                                                                                                                                                                                                                                                                                                                                                                                                                                                                                            |           | Laboratoire Biolim/FSS/UL                                                                           | Unité Mixte Internationale TransVIHMI (UMI 233 IRD - U1175 INSERM - Université de Montpellier)IRD (Institut de recherche pour le développement) | Mounerou SALOU, Christelle BUTEL, Wembo A. HALATOKO,Amivi EHLAN,Abia A. KONOU,Issaka Maman,Syntiche DEVATCHAGNI Adodo SADJI, Kokou TEGUENI,Koku AGBODEKA, Sidonie A.M.KAGNISSODE, Akoléé SILIADIN, Alassane OURO-MEDELI, Messanh DOUFFAN,Déléma MABA,Sika DOSSIM, Améyo DORKENOO, Mireille PRINCE-DAVID,Anoumou DAGNRA,Laetitia SERRANO,Ahidjo AYOUBA, Eric DELAPORTE, Martine PEETERS      |
| EPI_ISL_1508821, EPI_ISL_1508849                                                                                                                                                                                                                                                                                                                                                                                                                                                                                                                                                                                                                                                                                                                                                                                                                                                                                                                                                                                                                                                                                                                                                                                                                                                                                                                                                                                                                                                                                                                                                                                                                                                                                                                                                                                                                                                                                                                                                                                                                                                                                                                                                                                                                                                                                                                                                                                                                                                                                                                                                                                                                                                                                                                           |           | Laboratoire Biolim/FSS/UL                                                                           | Unité Mixte Internationale TransVIHMI (UMI 233 IRD - U1175 INSERM - Université de Montpellier)IRD (Institut de recherche pour le développement) | Mounerou SALOU, Christelle BUTEL, Wembo A. HALATOKO, Amivi EHLAN, Abia A. KONOU, Issaka Maman, Syntiche DEVATCHAGNI, Adodo SADJI, Kokou TEGUENI,Koku AGBODEKA, Sidonie A.M.KAGNISSODE, Akoléé SILIADIN, Alassane OURO-MEDELI, Messanh DOUFFAN,Déléma MABA,Sika DOSSIM, Améyo DORKENOO, Mireille PRINCE-DAVID,Anoumou DAGNRA,Laetitia SERRANO,Ahidjo AYOUBA, Eric DELAPORTE, Martine PEETERS |
| EPI_ISL_1508890                                                                                                                                                                                                                                                                                                                                                                                                                                                                                                                                                                                                                                                                                                                                                                                                                                                                                                                                                                                                                                                                                                                                                                                                                                                                                                                                                                                                                                                                                                                                                                                                                                                                                                                                                                                                                                                                                                                                                                                                                                                                                                                                                                                                                                                                                                                                                                                                                                                                                                                                                                                                                                                                                                                                            |           | Laboratoire Biolim/FSS/UL                                                                           | Unité Mixte Internationale TransVIHMI (UMI 233 IRD - U1175 INSERM - Université de Montpellier)IRD (Institut de recherche pour le développement) | Mounerou SALOU, Christelle BUTEL, Wembo A. HALATOKO, Amivi EHLAN, Abia A. KONOU, Issaka Maman,Syntiche DEVATCHAGNI, Adodo SADJI, Kokou TEGUENI,Koku AGBODEKA, Sidonie A.M.KAGNISSODE, Akoléé SILIADIN, Alassane OURO-MEDELI, Messanh DOUFFAN,Déléma MABA,Sika DOSSIM, Améyo DORKENOO, Mireille PRINCE-DAVID,Anoumou DAGNRA,Laetitia SERRANO,Ahidjo AYOUBA, Eric DELAPORTE, Martine PEETERS  |
| EPI_ISL_1508894                                                                                                                                                                                                                                                                                                                                                                                                                                                                                                                                                                                                                                                                                                                                                                                                                                                                                                                                                                                                                                                                                                                                                                                                                                                                                                                                                                                                                                                                                                                                                                                                                                                                                                                                                                                                                                                                                                                                                                                                                                                                                                                                                                                                                                                                                                                                                                                                                                                                                                                                                                                                                                                                                                                                            |           | Laboratoire Biolim/FSS/UL                                                                           | Unité Mixte Internationale TransVIHMI (UMI 233 IRD - U1175 INSERM - Université de Montpellier)IRD (Institut de recherche pour le développement) | Mounerou SALOU, Christelle BUTEL, Wembo A. HALATOKO,Amivi EHLAN,Abia A. KONOU, Issaka Maman,Syntiche DEVATCHAGNI, Adodo SADJI, Kokou TEGUENI,Koku AGBODEKA, Sidonie A.M.KAGNISSODE, Akoléé SILIADIN, Alassane OURO-MEDELI, Messanh DOUFFAN,Déléma MABA,Sika DOSSIM, Améyo DORKENOO, Mireille PRINCE-DAVID,Anoumou DAGNRA,Laetitia SERRANO,Ahidjo AYOUBA, Eric DELAPORTE, Martine PEETERS    |
| EPI_ISL_1508896                                                                                                                                                                                                                                                                                                                                                                                                                                                                                                                                                                                                                                                                                                                                                                                                                                                                                                                                                                                                                                                                                                                                                                                                                                                                                                                                                                                                                                                                                                                                                                                                                                                                                                                                                                                                                                                                                                                                                                                                                                                                                                                                                                                                                                                                                                                                                                                                                                                                                                                                                                                                                                                                                                                                            |           | Laboratoire Biolim/FSS/UL                                                                           | Unité Mixte Internationale TransVIHMI (UMI 233 IRD - U1175 INSERM - Université de Montpellier)IRD (Institut de recherche pour le développement) | Mounerou SALOU, Christelle BUTEL, Wembo A. HALATOKO, Amivi EHLAN, Abia A. KONOU, Issaka Maman,Syntiche DEVATCHAGNI, Adodo SADJI, Kokou TEGUENI,Koku AGBODEKA, Sidonie A.M.KAGNISSODE, Akoléé SILIADIN, Alassane OURO-MEDELI, Messanh DOUFFAN,Déléma MABA,Sika DOSSIM, Améyo DORKENOO, Mireille PRINCE-DAVID,Anoumou DAGNRA,Laetitia SERRANO,Ahidjo AYOUBA, Eric DELAPORTE, Martine PEETERS  |











|                                                                                                                                                                                                                                                                                                                                                                                                                                                                                                                                                                                                                                                                                                                                                                                                                                                                                                                                                                                                                                                                                                                                                                                                                                                                                                                                                                                                                                                                                                                                                                                                                                             |                                                                                                                       |                                                                                                                                                  |                                                                                                                                                                                                                                                                                                                                                                                                    |                                                                                   |
|---------------------------------------------------------------------------------------------------------------------------------------------------------------------------------------------------------------------------------------------------------------------------------------------------------------------------------------------------------------------------------------------------------------------------------------------------------------------------------------------------------------------------------------------------------------------------------------------------------------------------------------------------------------------------------------------------------------------------------------------------------------------------------------------------------------------------------------------------------------------------------------------------------------------------------------------------------------------------------------------------------------------------------------------------------------------------------------------------------------------------------------------------------------------------------------------------------------------------------------------------------------------------------------------------------------------------------------------------------------------------------------------------------------------------------------------------------------------------------------------------------------------------------------------------------------------------------------------------------------------------------------------|-----------------------------------------------------------------------------------------------------------------------|--------------------------------------------------------------------------------------------------------------------------------------------------|----------------------------------------------------------------------------------------------------------------------------------------------------------------------------------------------------------------------------------------------------------------------------------------------------------------------------------------------------------------------------------------------------|-----------------------------------------------------------------------------------|
|                                                                                                                                                                                                                                                                                                                                                                                                                                                                                                                                                                                                                                                                                                                                                                                                                                                                                                                                                                                                                                                                                                                                                                                                                                                                                                                                                                                                                                                                                                                                                                                                                                             |                                                                                                                       |                                                                                                                                                  |                                                                                                                                                                                                                                                                                                                                                                                                    | SJ, Tegally H, de Oliveira T, Carolyn Williamson                                  |
| EPI_ISL_1534449                                                                                                                                                                                                                                                                                                                                                                                                                                                                                                                                                                                                                                                                                                                                                                                                                                                                                                                                                                                                                                                                                                                                                                                                                                                                                                                                                                                                                                                                                                                                                                                                                             | Bongoletu Clinic wc BLC                                                                                               | NHLS/UCT                                                                                                                                         | Arash Iranzadeh, Deelan Doolabh, Lynn Tyers, Bruna Galvao, Innocent Mudau, Marvin Hsiao, Kruger Marais, Diana Hardie, Stephen Korsman, Emmanuel SJ, Tegally H, de Oliveira T, Carolyn Williamson                                                                                                                                                                                                   |                                                                                   |
| EPI_ISL_1534450, EPI_ISL_1534451, EPI_ISL_1534452, EPI_ISL_1534453                                                                                                                                                                                                                                                                                                                                                                                                                                                                                                                                                                                                                                                                                                                                                                                                                                                                                                                                                                                                                                                                                                                                                                                                                                                                                                                                                                                                                                                                                                                                                                          | Groote Schuur Hospital wc GSH                                                                                         | NHLS/UCT                                                                                                                                         | Arash Iranzadeh, Deelan Doolabh, Lynn Tyers, Bruna Galvao, Innocent Mudau, Marvin Hsiao, Kruger Marais, Diana Hardie, Stephen Korsman, Emmanuel SJ, Tegally H, de Oliveira T, Carolyn Williamson                                                                                                                                                                                                   |                                                                                   |
| EPI_ISL_1534454                                                                                                                                                                                                                                                                                                                                                                                                                                                                                                                                                                                                                                                                                                                                                                                                                                                                                                                                                                                                                                                                                                                                                                                                                                                                                                                                                                                                                                                                                                                                                                                                                             | Alma CDC wc AHC                                                                                                       | NHLS/UCT                                                                                                                                         | Arash Iranzadeh, Deelan Doolabh, Lynn Tyers, Bruna Galvao, Innocent Mudau, Marvin Hsiao, Kruger Marais, Diana Hardie, Stephen Korsman, Emmanuel SJ, Tegally H, de Oliveira T, Carolyn Williamson                                                                                                                                                                                                   |                                                                                   |
| EPI_ISL_1534455                                                                                                                                                                                                                                                                                                                                                                                                                                                                                                                                                                                                                                                                                                                                                                                                                                                                                                                                                                                                                                                                                                                                                                                                                                                                                                                                                                                                                                                                                                                                                                                                                             | Groote Schuur Hospital wc GSH                                                                                         | NHLS/UCT                                                                                                                                         | Arash Iranzadeh, Deelan Doolabh, Lynn Tyers, Bruna Galvao, Innocent Mudau, Marvin Hsiao, Kruger Marais, Diana Hardie, Stephen Korsman, Emmanuel SJ, Tegally H, de Oliveira T, Carolyn Williamson                                                                                                                                                                                                   |                                                                                   |
| EPI_ISL_1534456                                                                                                                                                                                                                                                                                                                                                                                                                                                                                                                                                                                                                                                                                                                                                                                                                                                                                                                                                                                                                                                                                                                                                                                                                                                                                                                                                                                                                                                                                                                                                                                                                             | Oudtshoorn Hospital wc OUD                                                                                            | NHLS/UCT                                                                                                                                         | Arash Iranzadeh, Deelan Doolabh, Lynn Tyers, Bruna Galvao, Innocent Mudau, Marvin Hsiao, Kruger Marais, Diana Hardie, Stephen Korsman, Emmanuel SJ, Tegally H, de Oliveira T, Carolyn Williamson                                                                                                                                                                                                   |                                                                                   |
| EPI_ISL_1534457                                                                                                                                                                                                                                                                                                                                                                                                                                                                                                                                                                                                                                                                                                                                                                                                                                                                                                                                                                                                                                                                                                                                                                                                                                                                                                                                                                                                                                                                                                                                                                                                                             | Groote Schuur Hospital wc GSH                                                                                         | NHLS/UCT                                                                                                                                         | Arash Iranzadeh, Deelan Doolabh, Lynn Tyers, Bruna Galvao, Innocent Mudau, Marvin Hsiao, Kruger Marais, Diana Hardie, Stephen Korsman, Emmanuel SJ, Tegally H, de Oliveira T, Carolyn Williamson                                                                                                                                                                                                   |                                                                                   |
| EPI_ISL_1534458                                                                                                                                                                                                                                                                                                                                                                                                                                                                                                                                                                                                                                                                                                                                                                                                                                                                                                                                                                                                                                                                                                                                                                                                                                                                                                                                                                                                                                                                                                                                                                                                                             | Pacaltsdorp Clinic wc PAC                                                                                             | NHLS/UCT                                                                                                                                         | Arash Iranzadeh, Deelan Doolabh, Lynn Tyers, Bruna Galvao, Innocent Mudau, Marvin Hsiao, Kruger Marais, Diana Hardie, Stephen Korsman, Emmanuel SJ, Tegally H, de Oliveira T, Carolyn Williamson                                                                                                                                                                                                   |                                                                                   |
| EPI_ISL_1534459                                                                                                                                                                                                                                                                                                                                                                                                                                                                                                                                                                                                                                                                                                                                                                                                                                                                                                                                                                                                                                                                                                                                                                                                                                                                                                                                                                                                                                                                                                                                                                                                                             | Groote Schuur Hospital wc GSH                                                                                         | NHLS/UCT                                                                                                                                         | Arash Iranzadeh, Deelan Doolabh, Lynn Tyers, Bruna Galvao, Innocent Mudau, Marvin Hsiao, Kruger Marais, Diana Hardie, Stephen Korsman, Emmanuel SJ, Tegally H, de Oliveira T, Carolyn Williamson                                                                                                                                                                                                   |                                                                                   |
| EPI_ISL_1534460                                                                                                                                                                                                                                                                                                                                                                                                                                                                                                                                                                                                                                                                                                                                                                                                                                                                                                                                                                                                                                                                                                                                                                                                                                                                                                                                                                                                                                                                                                                                                                                                                             | D'Almeida Clinic wc DAL                                                                                               | NHLS/UCT                                                                                                                                         | Arash Iranzadeh, Deelan Doolabh, Lynn Tyers, Bruna Galvao, Innocent Mudau, Marvin Hsiao, Kruger Marais, Diana Hardie, Stephen Korsman, Emmanuel SJ, Tegally H, de Oliveira T, Carolyn Williamson                                                                                                                                                                                                   |                                                                                   |
| EPI_ISL_1534461                                                                                                                                                                                                                                                                                                                                                                                                                                                                                                                                                                                                                                                                                                                                                                                                                                                                                                                                                                                                                                                                                                                                                                                                                                                                                                                                                                                                                                                                                                                                                                                                                             | False Bay Hospital wc FBH                                                                                             | NHLS/UCT                                                                                                                                         | Arash Iranzadeh, Deelan Doolabh, Lynn Tyers, Bruna Galvao, Innocent Mudau, Marvin Hsiao, Kruger Marais, Diana Hardie, Stephen Korsman, Emmanuel SJ, Tegally H, de Oliveira T, Carolyn Williamson                                                                                                                                                                                                   |                                                                                   |
| EPI_ISL_1545272, EPI_ISL_1545273, EPI_ISL_1545274, EPI_ISL_1545275, EPI_ISL_1545276, EPI_ISL_1545277, EPI_ISL_1545278, EPI_ISL_1545279, EPI_ISL_1545280, EPI_ISL_1545281, EPI_ISL_1545282, EPI_ISL_1545283, EPI_ISL_1545284, EPI_ISL_1545285, EPI_ISL_1545286, EPI_ISL_1545287, EPI_ISL_1545288, EPI_ISL_1545289, EPI_ISL_1545290, EPI_ISL_1545292, EPI_ISL_1545293, EPI_ISL_1545294, EPI_ISL_1545295, EPI_ISL_1545296, EPI_ISL_1545297, EPI_ISL_1545298, EPI_ISL_1545299, EPI_ISL_1545300, EPI_ISL_1545322, EPI_ISL_1545324, EPI_ISL_1545325, EPI_ISL_1545326, EPI_ISL_1545327, EPI_ISL_1545328, EPI_ISL_1545329, EPI_ISL_1545330, EPI_ISL_1545331, EPI_ISL_1545332, EPI_ISL_1545333, EPI_ISL_1545334, EPI_ISL_1545335, EPI_ISL_1545336, EPI_ISL_1545337, EPI_ISL_1545338, EPI_ISL_1545341, EPI_ISL_1545342, EPI_ISL_1545343, EPI_ISL_1545344, EPI_ISL_1545345, EPI_ISL_1545346, EPI_ISL_1545347, EPI_ISL_1545348, EPI_ISL_1545349, EPI_ISL_1545350, EPI_ISL_1545351, EPI_ISL_1545352, EPI_ISL_1545353, EPI_ISL_1545354, EPI_ISL_1545355, EPI_ISL_1545356, EPI_ISL_1545357, EPI_ISL_1545358, EPI_ISL_1545359, EPI_ISL_1545360, EPI_ISL_1545361, EPI_ISL_1545362, EPI_ISL_1545363, EPI_ISL_1545364, EPI_ISL_1545365, EPI_ISL_1545366, EPI_ISL_1545367, EPI_ISL_1545368, EPI_ISL_1545369, EPI_ISL_1545370, EPI_ISL_1545371, EPI_ISL_1545372, EPI_ISL_1545373, EPI_ISL_1545374, EPI_ISL_1545375, EPI_ISL_1545376, EPI_ISL_1545377, EPI_ISL_1545378, EPI_ISL_1545379, EPI_ISL_1545380, EPI_ISL_1545381, EPI_ISL_1545382, EPI_ISL_1545383, EPI_ISL_1545384, EPI_ISL_1545385, EPI_ISL_1545386, EPI_ISL_1545387, EPI_ISL_1545388, EPI_ISL_1545389 |                                                                                                                       |                                                                                                                                                  |                                                                                                                                                                                                                                                                                                                                                                                                    |                                                                                   |
| see above                                                                                                                                                                                                                                                                                                                                                                                                                                                                                                                                                                                                                                                                                                                                                                                                                                                                                                                                                                                                                                                                                                                                                                                                                                                                                                                                                                                                                                                                                                                                                                                                                                   | Instituto Nacional de Investigação em Saúde                                                                           | KRISP, KZN Research Innovation and Sequencing Platform                                                                                           | Morais J, Neto Z, Afonso P, Miranda J, David K, Inglês L, Pereira A, Paulo A Carralero RR Paixão JP, Freitas RH, Mufinda M, Lutucuta S, Giandhari J, Pillay S, Naidoo Y, Emmanuel SJ, Tegally H, Wilkinson E, de Oliveira T                                                                                                                                                                        |                                                                                   |
| EPI_ISL_1548504                                                                                                                                                                                                                                                                                                                                                                                                                                                                                                                                                                                                                                                                                                                                                                                                                                                                                                                                                                                                                                                                                                                                                                                                                                                                                                                                                                                                                                                                                                                                                                                                                             | Laboratoire Biolim/FSS/UL                                                                                             | Unité Mixte Internationale TransVIHMI (UMI 233 IRD - U1175 INSERM - Université de Montpellier) IRD (Institut de recherche pour le développement) | Mounerou SALOU, Christelle BUTEL, Wembo A. HALATOKO, Amivi EHLAN, Abia A. KONOU, Issaka Maman, Syntyche DEVATCHAGNI, Adodo SADJI, Kokou TEGUENI, Koku AGBODEKA, Sidonie A.M.KAGNISSODE, Akoélé SILIADIN, Alassane OURO-MEDELI, Messanh DOUFFAN, Déliéma MABA, Sika DOSSIM, Améyo DORKENOO, Mireille PRINCE-DAVID, Anoumou DAGNRA, Laetitia SERRANO, Ahidjo AYOUBA, Eric DELAPORTE, Martine PEETERS |                                                                                   |
| EPI_ISL_1550913, EPI_ISL_1550921, EPI_ISL_1550924, EPI_ISL_1550930, EPI_ISL_1550932, EPI_ISL_1550938, EPI_ISL_1550939, EPI_ISL_1550941, EPI_ISL_1550942                                                                                                                                                                                                                                                                                                                                                                                                                                                                                                                                                                                                                                                                                                                                                                                                                                                                                                                                                                                                                                                                                                                                                                                                                                                                                                                                                                                                                                                                                     | National Health Laboratory Service, South Africa                                                                      | KRISP, KZN Research Innovation and Sequencing Platform                                                                                           | Giandhari J, Pillay S, Naidoo Y, Rampahl U, Lessells R, Mdlatlose K, York D, Khan S, Emmanuel SJ, Tegally H, Wilkinson E, de Oliveira T                                                                                                                                                                                                                                                            |                                                                                   |
| EPI_ISL_1575296, EPI_ISL_1575443, EPI_ISL_1575444, EPI_ISL_1575479                                                                                                                                                                                                                                                                                                                                                                                                                                                                                                                                                                                                                                                                                                                                                                                                                                                                                                                                                                                                                                                                                                                                                                                                                                                                                                                                                                                                                                                                                                                                                                          | Laboratoire Biolim/FSS/UL                                                                                             | Unité Mixte Internationale TransVIHMI (UMI 233 IRD - U1175 INSERM - Université de Montpellier) IRD (Institut de recherche pour le développement) | Mounerou SALOU, Christelle BUTEL, Wembo A. HALATOKO, Amivi EHLAN, Abia A. KONOU, Issaka Maman, Syntyche DEVATCHAGNI, Adodo SADJI, Kokou TEGUENI, Koku AGBODEKA, Sidonie A.M.KAGNISSODE, Akoélé SILIADIN, Alassane OURO-MEDELI, Messanh DOUFFAN, Déliéma MABA, Sika DOSSIM, Améyo DORKENOO, Mireille PRINCE-DAVID, Anoumou DAGNRA, Laetitia SERRANO, Ahidjo AYOUBA, Eric DELAPORTE, Martine PEETERS |                                                                                   |
| EPI_ISL_1576832                                                                                                                                                                                                                                                                                                                                                                                                                                                                                                                                                                                                                                                                                                                                                                                                                                                                                                                                                                                                                                                                                                                                                                                                                                                                                                                                                                                                                                                                                                                                                                                                                             | National reference Laboratory, NCDC, Gaduwa, Abuja                                                                    | National reference Laboratory, NCDC, Gaduwa, Abuja                                                                                               | Dr Ndodo Nnaemeka, Olusola Anuoluwapo Akanbi, Chimaobi Chukwu, Dr Omoare Adesuyi, Anthony Ahumbe, Nwando Mba, Dr Chikwe Ihekweazu                                                                                                                                                                                                                                                                  |                                                                                   |
| EPI_ISL_1585941, EPI_ISL_1586897, EPI_ISL_1586899, EPI_ISL_1586900, EPI_ISL_1586901, EPI_ISL_1586902, EPI_ISL_1586903, EPI_ISL_1586904, EPI_ISL_1586905, EPI_ISL_1586907, EPI_ISL_1586954, EPI_ISL_1587257                                                                                                                                                                                                                                                                                                                                                                                                                                                                                                                                                                                                                                                                                                                                                                                                                                                                                                                                                                                                                                                                                                                                                                                                                                                                                                                                                                                                                                  | Laboratoire Biolim/FSS/UL                                                                                             | Unité Mixte Internationale TransVIHMI (UMI 233 IRD - U1175 INSERM - Université de Montpellier) IRD (Institut de recherche pour le développement) | Mounerou SALOU, Christelle BUTEL, Wembo A. HALATOKO, Amivi EHLAN, Abia A. KONOU, Issaka Maman, Syntyche DEVATCHAGNI, Adodo SADJI, Kokou TEGUENI, Koku AGBODEKA, Sidonie A.M.KAGNISSODE, Akoélé SILIADIN, Alassane OURO-MEDELI, Messanh DOUFFAN, Déliéma MABA, Sika DOSSIM, Améyo DORKENOO, Mireille PRINCE-DAVID, Anoumou DAGNRA, Laetitia SERRANO, Ahidjo AYOUBA, Eric DELAPORTE, Martine PEETERS |                                                                                   |
| see above                                                                                                                                                                                                                                                                                                                                                                                                                                                                                                                                                                                                                                                                                                                                                                                                                                                                                                                                                                                                                                                                                                                                                                                                                                                                                                                                                                                                                                                                                                                                                                                                                                   | Laboratoire Biolim/FSS/UL                                                                                             | Unité Mixte Internationale TransVIHMI (UMI 233 IRD - U1175 INSERM - Université de Montpellier) IRD (Institut de recherche pour le développement) | Mounerou SALOU, Christelle BUTEL, Wembo A. HALATOKO, Amivi EHLAN, Abia A. KONOU, Issaka Maman, Syntyche DEVATCHAGNI, Adodo SADJI, Kokou TEGUENI, Koku AGBODEKA, Sidonie A.M.KAGNISSODE, Akoélé SILIADIN, Alassane OURO-MEDELI, Messanh DOUFFAN, Déliéma MABA, Sika DOSSIM, Améyo DORKENOO, Mireille PRINCE-DAVID, Anoumou DAGNRA, Laetitia SERRANO, Ahidjo AYOUBA, Eric DELAPORTE, Martine PEETERS |                                                                                   |
| EPI_ISL_1591099, EPI_ISL_1591100                                                                                                                                                                                                                                                                                                                                                                                                                                                                                                                                                                                                                                                                                                                                                                                                                                                                                                                                                                                                                                                                                                                                                                                                                                                                                                                                                                                                                                                                                                                                                                                                            | CMA Dano                                                                                                              | Centre Muraz                                                                                                                                     | Arsène Zongo, Ange Badjo, Yacouba Sawadogo, Jasmin Schlotterbeck, Essia Belarbi, Grit Schubert, Fabian Leendertz, Abdoul-Salam Ouedraogo, Thérèse Kagone, Arsène Somé, Firmin Kaboré, Arnel Poda, Soumeiya Ouaingraoua                                                                                                                                                                             |                                                                                   |
| EPI_ISL_1591359, EPI_ISL_1591377, EPI_ISL_1591378, EPI_ISL_1591379, EPI_ISL_1591380, EPI_ISL_1591381, EPI_ISL_1591382, EPI_ISL_1591387, EPI_ISL_1591388, EPI_ISL_1591389, EPI_ISL_1591390, EPI_ISL_1591391, EPI_ISL_1591392, EPI_ISL_1591393, EPI_ISL_1591394, EPI_ISL_1591395, EPI_ISL_1591396, EPI_ISL_1591397, EPI_ISL_1591398, EPI_ISL_1591399, EPI_ISL_1591400, EPI_ISL_1591401, EPI_ISL_1591402, EPI_ISL_1591403, EPI_ISL_1591404, EPI_ISL_1591405, EPI_ISL_1591406, EPI_ISL_1591407, EPI_ISL_1591408, EPI_ISL_1591409, EPI_ISL_1591410, EPI_ISL_1591411, EPI_ISL_1591412, EPI_ISL_1591413, EPI_ISL_1591414, EPI_ISL_1591415, EPI_ISL_1591416, EPI_ISL_1591417, EPI_ISL_1591418, EPI_ISL_1591419, EPI_ISL_1591420, EPI_ISL_1591421, EPI_ISL_1591422, EPI_ISL_1591423, EPI_ISL_1591424, EPI_ISL_1591425, EPI_ISL_1591426, EPI_ISL_1591427, EPI_ISL_1591428, EPI_ISL_1591429, EPI_ISL_1591430, EPI_ISL_1591431, EPI_ISL_1591432, EPI_ISL_1591433, EPI_ISL_1591434, EPI_ISL_1591435, EPI_ISL_1591436, EPI_ISL_1591437, EPI_ISL_1591438, EPI_ISL_1591439, EPI_ISL_1591440, EPI_ISL_1591441, EPI_ISL_1591442, EPI_ISL_1591443, EPI_ISL_1591444, EPI_ISL_1591445, EPI_ISL_1591446, EPI_ISL_1591447, EPI_ISL_1591448, EPI_ISL_1591450, EPI_ISL_1591451, EPI_ISL_1591452, EPI_ISL_1591453, EPI_ISL_1591454, EPI_ISL_1591455, EPI_ISL_1608099, EPI_ISL_1608102                                                                                                                                                                                                                                                                                 | Division of Medical Virology, National Health Laboratory Service (NHLS), Tygerberg Hospital / Stellenbosch University | Division of Medical Virology, Stellenbosch University and NHLS Tygerberg Hospital                                                                | Susan Engelbrecht, Bronwyn Kleinhans, Gert van Zyl, Wolfgang Preiser                                                                                                                                                                                                                                                                                                                               |                                                                                   |
| EPI_ISL_1610600, EPI_ISL_1610645                                                                                                                                                                                                                                                                                                                                                                                                                                                                                                                                                                                                                                                                                                                                                                                                                                                                                                                                                                                                                                                                                                                                                                                                                                                                                                                                                                                                                                                                                                                                                                                                            | KEMRI Center for Biotechnology Research and Development                                                               | KEMRI-Wellcome Trust Research Programme, Kilifi                                                                                                  | Githinji G., Matoke D., Mohamed K.S., de Laurent Z., Mburu M.W., Thiongo K.                                                                                                                                                                                                                                                                                                                        |                                                                                   |
| EPI_ISL_1623756, EPI_ISL_1623757, EPI_ISL_1623758, EPI_ISL_1623759, EPI_ISL_1623760, EPI_ISL_1623761, EPI_ISL_1623762                                                                                                                                                                                                                                                                                                                                                                                                                                                                                                                                                                                                                                                                                                                                                                                                                                                                                                                                                                                                                                                                                                                                                                                                                                                                                                                                                                                                                                                                                                                       | Viral Respiratory Lab, National Institute for Biomedical Research (INRB)                                              | Pathogen Sequencing Lab, National Institute for Biomedical Research (INRB)                                                                       | Placide Mbala-Kingebeni, Edith Nkwembe, Eddy Kinganda-Lusamaki, Amuri Aza, Francisca Muyembe Mawete, Emmanuel Lokilo Lofiko, Jean Claude Makangara, Catherine Pratt, Kwameh Pauthner, Josh Quick, Allison Black, James Hadfield, James Haddfield, Trevor Bedford, Ian Goodfellow, Andrew Rambaut, Nick Loman, Kristian Andersen, Michael Wiley, Steve Ahuka-Mundekwe, Jean-Jacques Muyembe Tamfum  |                                                                                   |
| EPI_ISL_1627088                                                                                                                                                                                                                                                                                                                                                                                                                                                                                                                                                                                                                                                                                                                                                                                                                                                                                                                                                                                                                                                                                                                                                                                                                                                                                                                                                                                                                                                                                                                                                                                                                             | National reference Laboratory, NCDC, Gaduwa, Abuja, Nigeria                                                           | National reference Laboratory, NCDC, Gaduwa, Abuja, Nigeria                                                                                      | Dr Ndodo Nnaemeka, Olusola Anuoluwapo Akanbi, Chimaobi Chukwu, Dr Omoare Adesuyi, Dr Grace Esebanmen, Kingsley Njoku, Catherine Okoi, Akinpelu Afolabi, Badaru Sikiru, Celestina Obiekea, Anthony Ahumbe, Nwando Mba, Dr Chikwe Ihekweazu                                                                                                                                                          |                                                                                   |
| EPI_ISL_1627092                                                                                                                                                                                                                                                                                                                                                                                                                                                                                                                                                                                                                                                                                                                                                                                                                                                                                                                                                                                                                                                                                                                                                                                                                                                                                                                                                                                                                                                                                                                                                                                                                             | Everight Diagnostics                                                                                                  | National reference Laboratory, NCDC, Gaduwa, Abuja, Nigeria                                                                                      | Dr Ndodo Nnaemeka, Olusola Anuoluwapo Akanbi, Chimaobi Chukwu, Dr Omoare Adesuyi, Dr Grace Esebanmen, Kingsley Njoku, Catherine Okoi, Akinpelu Afolabi, Badaru Sikiru, Celestina Obiekea, Anthony Ahumbe, Nwando Mba, Dr Chikwe Ihekweazu                                                                                                                                                          |                                                                                   |
| EPI_ISL_1627093, EPI_ISL_1627094, EPI_ISL_1627095                                                                                                                                                                                                                                                                                                                                                                                                                                                                                                                                                                                                                                                                                                                                                                                                                                                                                                                                                                                                                                                                                                                                                                                                                                                                                                                                                                                                                                                                                                                                                                                           | National reference Laboratory, NCDC, Gaduwa, Abuja, Nigeria                                                           | National reference Laboratory, NCDC, Gaduwa, Abuja, Nigeria                                                                                      | Dr Ndodo Nnaemeka, Olusola Anuoluwapo Akanbi, Chimaobi Chukwu, Dr Omoare Adesuyi, Dr Grace Esebanmen, Kingsley Njoku, Catherine Okoi, Akinpelu Afolabi, Badaru Sikiru, Celestina Obiekea, Anthony Ahumbe, Nwando Mba, Dr Chikwe Ihekweazu                                                                                                                                                          |                                                                                   |
| EPI_ISL_1627096                                                                                                                                                                                                                                                                                                                                                                                                                                                                                                                                                                                                                                                                                                                                                                                                                                                                                                                                                                                                                                                                                                                                                                                                                                                                                                                                                                                                                                                                                                                                                                                                                             | National reference Laboratory, NCDC, Gaduwa, Abuja, Nigeria                                                           | National reference Laboratory, NCDC, Gaduwa, Abuja, Nigeria                                                                                      | Dr Ndodo Nnaemeka, Olusola Anuoluwapo Akanbi, Chimaobi Chukwu, Dr Omoare Adesuyi, Dr Grace Esebanmen, Kingsley Njoku, Catherine Okoi, Akinpelu Afolabi, Badaru Sikiru, Celestina Obiekea, Adama Ahmad, Anthony Ahumbe, Nwando Mba, Dr Chikwe Ihekweazu                                                                                                                                             |                                                                                   |
| EPI_ISL_1628686, EPI_ISL_1628687, EPI_ISL_1628688, EPI_ISL_1628689, EPI_ISL_1628690, EPI_ISL_1628691, EPI_ISL_1628692, EPI_ISL_1628693, EPI_ISL_1628694, EPI_ISL_1628695, EPI_ISL_1628696, EPI_ISL_1628697, EPI_ISL_1628698, EPI_ISL_1628699                                                                                                                                                                                                                                                                                                                                                                                                                                                                                                                                                                                                                                                                                                                                                                                                                                                                                                                                                                                                                                                                                                                                                                                                                                                                                                                                                                                                | see above                                                                                                             | CERBALLIANCE                                                                                                                                     | UMR PIMIT                                                                                                                                                                                                                                                                                                                                                                                          | Dr David A Wilkinson, Dr Patrick Mavingui, Dr Camille Lebarbenchon, Magali Turpin |
| EPI_ISL_1628700, EPI_ISL_1628701, EPI_ISL_1628702, EPI_ISL_1628703,                                                                                                                                                                                                                                                                                                                                                                                                                                                                                                                                                                                                                                                                                                                                                                                                                                                                                                                                                                                                                                                                                                                                                                                                                                                                                                                                                                                                                                                                                                                                                                         | see above                                                                                                             | REUNILAB                                                                                                                                         | UMR PIMIT                                                                                                                                                                                                                                                                                                                                                                                          | Dr David A Wilkinson, Dr Patrick Mavingui, Dr Camille Lebarbenchon, Magali Turpin |





|                                                                                                                                                                                                                                                                                                                                                                                                                                                                                                                                                                                                                                                                                                                                                                                                                                                                                                                                     |                                                             |                                                                         |                                               |                                                                                                                                                                                                                                                                                                                                                                                                                                        |
|-------------------------------------------------------------------------------------------------------------------------------------------------------------------------------------------------------------------------------------------------------------------------------------------------------------------------------------------------------------------------------------------------------------------------------------------------------------------------------------------------------------------------------------------------------------------------------------------------------------------------------------------------------------------------------------------------------------------------------------------------------------------------------------------------------------------------------------------------------------------------------------------------------------------------------------|-------------------------------------------------------------|-------------------------------------------------------------------------|-----------------------------------------------|----------------------------------------------------------------------------------------------------------------------------------------------------------------------------------------------------------------------------------------------------------------------------------------------------------------------------------------------------------------------------------------------------------------------------------------|
| EPI_ISL_1629108, EPI_ISL_1629109, EPI_ISL_1629110, EPI_ISL_1629111, EPI_ISL_1629112, EPI_ISL_1629113, EPI_ISL_1629114, EPI_ISL_1629116, EPI_ISL_1629117, EPI_ISL_1629118, EPI_ISL_1629119, EPI_ISL_1629120, EPI_ISL_1629121, EPI_ISL_1629122, EPI_ISL_1629123, EPI_ISL_1629124                                                                                                                                                                                                                                                                                                                                                                                                                                                                                                                                                                                                                                                      | see above                                                   | GHER                                                                    | UMR PIMIT                                     | Dr David A Wilkinson, Dr Patrick Mavingui, Dr Camille Lebarbenchon, Magali Turpin                                                                                                                                                                                                                                                                                                                                                      |
| EPI_ISL_1629126, EPI_ISL_1629127, EPI_ISL_1629128, EPI_ISL_1629129, EPI_ISL_1629130, EPI_ISL_1629131, EPI_ISL_1629132, EPI_ISL_1629133, EPI_ISL_1629134, EPI_ISL_1629135, EPI_ISL_1629136, EPI_ISL_1629137, EPI_ISL_1629138, EPI_ISL_1629139, EPI_ISL_1629140, EPI_ISL_1629141, EPI_ISL_1629142, EPI_ISL_1629143, EPI_ISL_1629144, EPI_ISL_1629145, EPI_ISL_1629146, EPI_ISL_1629147, EPI_ISL_1629148, EPI_ISL_1629149, EPI_ISL_1629150, EPI_ISL_1629151, EPI_ISL_1629152, EPI_ISL_1629153, EPI_ISL_1629154, EPI_ISL_1629155, EPI_ISL_1629156, EPI_ISL_1629157, EPI_ISL_1629158, EPI_ISL_1629159, EPI_ISL_1629160, EPI_ISL_1629161, EPI_ISL_1629162, EPI_ISL_1629163                                                                                                                                                                                                                                                                | see above                                                   | CERBALLIANCE                                                            | UMR PIMIT                                     | Dr David A Wilkinson, Dr Patrick Mavingui, Dr Camille Lebarbenchon, Magali Turpin                                                                                                                                                                                                                                                                                                                                                      |
| EPI_ISL_1629165, EPI_ISL_1629166, EPI_ISL_1629167, EPI_ISL_1629168, EPI_ISL_1629169, EPI_ISL_1629172, EPI_ISL_1629173                                                                                                                                                                                                                                                                                                                                                                                                                                                                                                                                                                                                                                                                                                                                                                                                               |                                                             | GHER                                                                    | UMR PIMIT                                     | Dr David A Wilkinson, Dr Patrick Mavingui, Dr Camille Lebarbenchon, Magali Turpin                                                                                                                                                                                                                                                                                                                                                      |
| EPI_ISL_1629174, EPI_ISL_1629175, EPI_ISL_1629176, EPI_ISL_1629177                                                                                                                                                                                                                                                                                                                                                                                                                                                                                                                                                                                                                                                                                                                                                                                                                                                                  |                                                             | CHU                                                                     | UMR PIMIT                                     | Dr David A Wilkinson, Dr Patrick Mavingui, Dr Camille Lebarbenchon, Magali Turpin                                                                                                                                                                                                                                                                                                                                                      |
| EPI_ISL_1629180, EPI_ISL_1629181, EPI_ISL_1629182                                                                                                                                                                                                                                                                                                                                                                                                                                                                                                                                                                                                                                                                                                                                                                                                                                                                                   |                                                             | GHER                                                                    | UMR PIMIT                                     | Dr David A Wilkinson, Dr Patrick Mavingui, Dr Camille Lebarbenchon, Magali Turpin                                                                                                                                                                                                                                                                                                                                                      |
| EPI_ISL_1629183, EPI_ISL_1629184, EPI_ISL_1629187, EPI_ISL_1629188                                                                                                                                                                                                                                                                                                                                                                                                                                                                                                                                                                                                                                                                                                                                                                                                                                                                  |                                                             | CHU                                                                     | UMR PIMIT                                     | Dr David A Wilkinson, Dr Patrick Mavingui, Dr Camille Lebarbenchon, Magali Turpin                                                                                                                                                                                                                                                                                                                                                      |
| EPI_ISL_1629189, EPI_ISL_1629190, EPI_ISL_1629191, EPI_ISL_1629192, EPI_ISL_1629193, EPI_ISL_1629194, EPI_ISL_1629195, EPI_ISL_1629196, EPI_ISL_1629197, EPI_ISL_1629198, EPI_ISL_1629199, EPI_ISL_1629200, EPI_ISL_1629201, EPI_ISL_1629202, EPI_ISL_1629203, EPI_ISL_1629204, EPI_ISL_1629205, EPI_ISL_1629206, EPI_ISL_1629207, EPI_ISL_1629208                                                                                                                                                                                                                                                                                                                                                                                                                                                                                                                                                                                  | see above                                                   | REUNILAB                                                                | UMR PIMIT                                     | Dr David A Wilkinson, Dr Patrick Mavingui, Dr Camille Lebarbenchon, Magali Turpin                                                                                                                                                                                                                                                                                                                                                      |
| EPI_ISL_1629260, EPI_ISL_1629263                                                                                                                                                                                                                                                                                                                                                                                                                                                                                                                                                                                                                                                                                                                                                                                                                                                                                                    |                                                             | CHU NORD                                                                | UMR PIMIT                                     | Dr David A Wilkinson, Dr Patrick Mavingui, Dr Camille Lebarbenchon, Magali Turpin                                                                                                                                                                                                                                                                                                                                                      |
| EPI_ISL_1629341, EPI_ISL_1629342, EPI_ISL_1629343, EPI_ISL_1629344, EPI_ISL_1629345, EPI_ISL_1629346, EPI_ISL_1629347, EPI_ISL_1629348, EPI_ISL_1629349                                                                                                                                                                                                                                                                                                                                                                                                                                                                                                                                                                                                                                                                                                                                                                             |                                                             | REUNILAB                                                                | UMR PIMIT                                     | Dr David A Wilkinson, Dr Patrick Mavingui, Dr Camille Lebarbenchon, Magali Turpin                                                                                                                                                                                                                                                                                                                                                      |
| EPI_ISL_1629350, EPI_ISL_1629351, EPI_ISL_1629352, EPI_ISL_1629353, EPI_ISL_1629354, EPI_ISL_1629355                                                                                                                                                                                                                                                                                                                                                                                                                                                                                                                                                                                                                                                                                                                                                                                                                                |                                                             | CERBALLIANCE                                                            | UMR PIMIT                                     | Dr David A Wilkinson, Dr Patrick Mavingui, Dr Camille Lebarbenchon, Magali Turpin                                                                                                                                                                                                                                                                                                                                                      |
| EPI_ISL_1629381, EPI_ISL_1629382, EPI_ISL_1629383, EPI_ISL_1629384, EPI_ISL_1629385, EPI_ISL_1629386, EPI_ISL_1629387, EPI_ISL_1629388, EPI_ISL_1629389, EPI_ISL_1629390, EPI_ISL_1629391, EPI_ISL_1629392, EPI_ISL_1629393, EPI_ISL_1629394, EPI_ISL_1629395, EPI_ISL_1629396, EPI_ISL_1629397                                                                                                                                                                                                                                                                                                                                                                                                                                                                                                                                                                                                                                     | see above                                                   | CHU                                                                     | UMR PIMIT                                     | Dr David A Wilkinson, Dr Patrick Mavingui, Dr Camille Lebarbenchon, Magali Turpin                                                                                                                                                                                                                                                                                                                                                      |
| EPI_ISL_1629398                                                                                                                                                                                                                                                                                                                                                                                                                                                                                                                                                                                                                                                                                                                                                                                                                                                                                                                     |                                                             | SAINT BENOIT                                                            | UMR PIMIT                                     | Dr David A Wilkinson, Dr Patrick Mavingui, Dr Camille Lebarbenchon, Magali Turpin                                                                                                                                                                                                                                                                                                                                                      |
| EPI_ISL_1629399, EPI_ISL_1629400, EPI_ISL_1629401, EPI_ISL_1629402, EPI_ISL_1629403, EPI_ISL_1629404, EPI_ISL_1629405, EPI_ISL_1629406, EPI_ISL_1629407, EPI_ISL_1629408, EPI_ISL_1629409, EPI_ISL_1629410, EPI_ISL_1629411, EPI_ISL_1629412                                                                                                                                                                                                                                                                                                                                                                                                                                                                                                                                                                                                                                                                                        | see above                                                   | REUNILAB                                                                | UMR PIMIT                                     | Dr David A Wilkinson, Dr Patrick Mavingui, Dr Camille Lebarbenchon, Magali Turpin                                                                                                                                                                                                                                                                                                                                                      |
| EPI_ISL_1629413, EPI_ISL_1629414, EPI_ISL_1629415, EPI_ISL_1629416, EPI_ISL_1629417, EPI_ISL_1629418, EPI_ISL_1629419, EPI_ISL_1629420                                                                                                                                                                                                                                                                                                                                                                                                                                                                                                                                                                                                                                                                                                                                                                                              |                                                             | BIO AUSTRAL                                                             | UMR PIMIT                                     | Dr David A Wilkinson, Dr Patrick Mavingui, Dr Camille Lebarbenchon, Magali Turpin                                                                                                                                                                                                                                                                                                                                                      |
| EPI_ISL_1629437                                                                                                                                                                                                                                                                                                                                                                                                                                                                                                                                                                                                                                                                                                                                                                                                                                                                                                                     |                                                             | REUNILAB                                                                | UMR PIMIT                                     | Dr David A Wilkinson, Dr Patrick Mavingui, Dr Camille Lebarbenchon, Magali Turpin                                                                                                                                                                                                                                                                                                                                                      |
| EPI_ISL_1629472                                                                                                                                                                                                                                                                                                                                                                                                                                                                                                                                                                                                                                                                                                                                                                                                                                                                                                                     |                                                             | CHU                                                                     | UMR PIMIT                                     | Dr David A Wilkinson, Dr Patrick Mavingui, Dr Camille Lebarbenchon, Magali Turpin                                                                                                                                                                                                                                                                                                                                                      |
| EPI_ISL_1629473, EPI_ISL_1629474                                                                                                                                                                                                                                                                                                                                                                                                                                                                                                                                                                                                                                                                                                                                                                                                                                                                                                    |                                                             | REUNILAB                                                                | UMR PIMIT                                     | Dr David A Wilkinson, Dr Patrick Mavingui, Dr Camille Lebarbenchon, Magali Turpin                                                                                                                                                                                                                                                                                                                                                      |
| EPI_ISL_1629712, EPI_ISL_1629713                                                                                                                                                                                                                                                                                                                                                                                                                                                                                                                                                                                                                                                                                                                                                                                                                                                                                                    | National Reference Laboratory, NCDC, Gaduwa, Abuja, Nigeria | National Reference Laboratory, NCDC, Gaduwa, Abuja, Nigeria             |                                               | Dr Ndodo Nnaemeka, Olusola Anuoluwapo Akanbi, Chimaobi Chukwu, Dr Omoare Adesuyi, Dr Grace Esebanmen, Anthony Ahumibe, Nwando Mba, Dr Chikwe Ihekweazu                                                                                                                                                                                                                                                                                 |
| EPI_ISL_1629714                                                                                                                                                                                                                                                                                                                                                                                                                                                                                                                                                                                                                                                                                                                                                                                                                                                                                                                     | National Reference Laboratory, NCDC, Gaduwa, Abuja, Nigeria | National Reference Laboratory, NCDC, Gaduwa, Abuja, Nigeria             |                                               | Dr Ndodo Nnaemeka, Olusola Anuoluwapo Akanbi, Chimaobi Chukwu, Dr Omoare Adesuyi, Anthony Ahumibe, Nwando Mba, Dr Chikwe Ihekweazu                                                                                                                                                                                                                                                                                                     |
| EPI_ISL_1630256, EPI_ISL_1630257, EPI_ISL_1630258, EPI_ISL_1630259, EPI_ISL_1630260, EPI_ISL_1630262, EPI_ISL_1630263, EPI_ISL_1630264, EPI_ISL_1630265, EPI_ISL_1630272                                                                                                                                                                                                                                                                                                                                                                                                                                                                                                                                                                                                                                                                                                                                                            |                                                             | IRESEEF                                                                 | Abbott                                        | Souleymane Mboup, Ambroise Ahouidi, Adbou Padane, Nafissatou Leye, Moustapha Mbou, Aminata Mboup, Papa Alassane Diaw, Cyrille Diedhiou, Aminata Dia , Anna julienne selbe Ndiaye, Ndeye Diabou Diagne, Ana Olivo, Todd Meyer, Barbara Harris, Mary Rodgers, Gavin Cloherty                                                                                                                                                             |
| EPI_ISL_1652055, EPI_ISL_1652056, EPI_ISL_1652057, EPI_ISL_1652058, EPI_ISL_1652059, EPI_ISL_1652060, EPI_ISL_1652067, EPI_ISL_1652068, EPI_ISL_1652069, EPI_ISL_1652070, EPI_ISL_1652071, EPI_ISL_1652072, EPI_ISL_1652073                                                                                                                                                                                                                                                                                                                                                                                                                                                                                                                                                                                                                                                                                                         | see above                                                   | Integrated Biorepository of H3Africa Uganda - IBRH3AU                   | Molecular Biology Laboratory                  | Savannah Mwesigwa, Eric Katagiriya, Gerald Mboowa, David Patrick Kateete, Misaki Wayengera, Emmanuel Nasinghe, Ashaba Fred Katabazi, Edgar Kigozi, Samuel Kirimunda, Rogers Kamulegeya, Moses Luutu, Lwanga Newton, Nsubuga Gideon, Bernard Ssentalo Bagaya, Sarah Stanley, Moses Joloba                                                                                                                                               |
| EPI_ISL_1654211, EPI_ISL_1654212, EPI_ISL_1654213, EPI_ISL_1654214, EPI_ISL_1654215, EPI_ISL_1654216, EPI_ISL_1654218                                                                                                                                                                                                                                                                                                                                                                                                                                                                                                                                                                                                                                                                                                                                                                                                               |                                                             | Fondation Congolaise pour la recherche medicale (FCRM), Francine Ntoumi | Institute of Tropical Medicine                | Prof. Francine Ntoumi and Prof. Dr. Thirumalaisamy P. Velavan                                                                                                                                                                                                                                                                                                                                                                          |
| EPI_ISL_1655962, EPI_ISL_1655963                                                                                                                                                                                                                                                                                                                                                                                                                                                                                                                                                                                                                                                                                                                                                                                                                                                                                                    |                                                             | Integrated Biorepository of H3Africa Uganda - IBRH3AU                   | Molecular Biology Laboratory                  | Savannah Mwesigwa, Eric Katagiriya, Gerald Mboowa, David Patrick Kateete, Misaki Wayengera, Emmanuel Nasinghe, Ashaba Fred Katabazi, Edgar Kigozi, Samuel Kirimunda, Rogers Kamulegeya, Moses Luutu, Lwanga Newton, Nsubuga Gideon, Bernard Ssentalo Bagaya, Sarah Stanley, Moses Joloba                                                                                                                                               |
| EPI_ISL_1660235, EPI_ISL_1660236, EPI_ISL_1660237, EPI_ISL_1660238, EPI_ISL_1660239, EPI_ISL_1660240, EPI_ISL_1660241, EPI_ISL_1660242, EPI_ISL_1660243, EPI_ISL_1660244, EPI_ISL_1660245, EPI_ISL_1660246, EPI_ISL_1660247, EPI_ISL_1660248, EPI_ISL_1660249, EPI_ISL_1660250, EPI_ISL_1660251, EPI_ISL_1660252, EPI_ISL_1660253, EPI_ISL_1660254, EPI_ISL_1660255, EPI_ISL_1660256, EPI_ISL_1660257, EPI_ISL_1660258, EPI_ISL_1660259, EPI_ISL_1660260, EPI_ISL_1660261, EPI_ISL_1660262, EPI_ISL_1660263, EPI_ISL_1660264, EPI_ISL_1660265, EPI_ISL_1660266, EPI_ISL_1660267, EPI_ISL_1660268, EPI_ISL_1660269, EPI_ISL_1660270, EPI_ISL_1660271, EPI_ISL_1660272, EPI_ISL_1660273, EPI_ISL_1660274, EPI_ISL_1660275, EPI_ISL_1660276, EPI_ISL_1660277, EPI_ISL_1660278, EPI_ISL_1660279, EPI_ISL_1660280, EPI_ISL_1660281, EPI_ISL_1660282, EPI_ISL_1660283, EPI_ISL_1660284, EPI_ISL_1660285, EPI_ISL_1660286, EPI_ISL_1660287 | see above                                                   | Virology Unit, Institut Pasteur de Madagascar                           | Virology Unit, Institut Pasteur de Madagascar | Christian Ranaivoson, Cara E. Brook, Vida Ahyong, Soa Fy Andriamandimby, Vololoniaina Raharinosy, Tsiry Randriambolanantsoa, Helisoa Razafimanjato, Norosoa Razanajatovo, Michelle Tan, Cristina M. Tato, Joseph L. DeRisi, Jean-Michel Heraud, Philippe Dussart                                                                                                                                                                       |
| EPI_ISL_1660293, EPI_ISL_1660294, EPI_ISL_1660295, EPI_ISL_1660297, EPI_ISL_1660298, EPI_ISL_1660299, EPI_ISL_1660300, EPI_ISL_1660301, EPI_ISL_1660302, EPI_ISL_1660303, EPI_ISL_1660304, EPI_ISL_1660305, EPI_ISL_1660306, EPI_ISL_1660307, EPI_ISL_1660308, EPI_ISL_1660309, EPI_ISL_1660332, EPI_ISL_1660333, EPI_ISL_1660334, EPI_ISL_1660335, EPI_ISL_1660336                                                                                                                                                                                                                                                                                                                                                                                                                                                                                                                                                                 | see above                                                   | Virology Unit, Institut Pasteur de Madagascar                           | Virology Unit, Institut Pasteur de Madagascar | Marion Barbet, Sylvie Behillil, Frédéric Lemoine, Corinne Maufrais, Christophe Malabat, Emmanuelle Permal, Méline Bizard, Angela Brisebarre, Camille Capel, Louise Lefrançois, Etienne Simon-Lorière, Vincent Enouf, Maud Vanpeene, Christian Ranaivoson, Cara E. Brook, Soa Fy Andriamandimby, Vololoniaina Raharinosy, Tsiry Randriambolanantsoa, Helisoa Razafimanjato, Norosoa Razanajatovo, Sylvie van der Werf, Philippe Dussart |

|                                                                                                                                                                                                                                                                                                                                                                                                                                                                                                                                                                                                                                                                                                                                                                                                                                                                                                                    |           |                                                                                                     |                                                                                                                                                  |                                                                                                                                                                                                                                                                                                                                                                                                                               |
|--------------------------------------------------------------------------------------------------------------------------------------------------------------------------------------------------------------------------------------------------------------------------------------------------------------------------------------------------------------------------------------------------------------------------------------------------------------------------------------------------------------------------------------------------------------------------------------------------------------------------------------------------------------------------------------------------------------------------------------------------------------------------------------------------------------------------------------------------------------------------------------------------------------------|-----------|-----------------------------------------------------------------------------------------------------|--------------------------------------------------------------------------------------------------------------------------------------------------|-------------------------------------------------------------------------------------------------------------------------------------------------------------------------------------------------------------------------------------------------------------------------------------------------------------------------------------------------------------------------------------------------------------------------------|
| EPI_ISL_1663649, EPI_ISL_1663650, EPI_ISL_1663651, EPI_ISL_1663652, EPI_ISL_1663653, EPI_ISL_1663654, EPI_ISL_1663655, EPI_ISL_1663656, EPI_ISL_1663659, EPI_ISL_1663663, EPI_ISL_1663666, EPI_ISL_1663667, EPI_ISL_1663668, EPI_ISL_1663671, EPI_ISL_1663672, EPI_ISL_1663675, EPI_ISL_1663676                                                                                                                                                                                                                                                                                                                                                                                                                                                                                                                                                                                                                    | see above | Molecular diagnostic unit for viral haemorrhagic fevers and emerging viruses, Bouaké CHU Laboratory | Molecular diagnostic unit for viral haemorrhagic fevers and emerging viruses, Bouaké CHU Laboratory                                              | Chantal Akoua-Koffi, Diané Bamourou, Etilé Anoh, Oby Wayoro, Safiatou Karidioula, Adjaratou Traoré, Soundélé Maïté, Monemo Pacome, Coulibaly Mbegan, Bamba Fatoumata Touré, Kra Ouffoué, Grit Schubert, Essia Belarbi, Fabian Leendertz                                                                                                                                                                                       |
| EPI_ISL_1671922, EPI_ISL_1671924, EPI_ISL_1671927, EPI_ISL_1671928, EPI_ISL_1671929, EPI_ISL_1671930, EPI_ISL_1671931                                                                                                                                                                                                                                                                                                                                                                                                                                                                                                                                                                                                                                                                                                                                                                                              |           | Fondation Congolaise pour la recherche medicale (FCRM), Francine Ntoumi                             | Institute of Tropical Medicine                                                                                                                   | Prof. Dr. Thirumalaisamy P. Velavan and Prof. Francine Ntoumi                                                                                                                                                                                                                                                                                                                                                                 |
| EPI_ISL_1672388, EPI_ISL_1672389, EPI_ISL_1672390                                                                                                                                                                                                                                                                                                                                                                                                                                                                                                                                                                                                                                                                                                                                                                                                                                                                  |           | Virology Unit, Institut Pasteur de Madagascar                                                       | Virology Unit, Institut Pasteur de Madagascar                                                                                                    | Christian Ranaivoson, Cara E. Brook, Vida Ahyong, Soa Fy Andriamandimby, Vololonaina Raharinosy, Tsiry Randriambolanantsoa, Helisoa Razafimanjato, Norosoa Razanajatovo, Michelle Tan, Cristina M. Tato, Joseph L. DeRisi, Jean-Michel Heraud, Philippe Dussart                                                                                                                                                               |
| EPI_ISL_1673314, EPI_ISL_1673315, EPI_ISL_1673316, EPI_ISL_1673317, EPI_ISL_1673318, EPI_ISL_1673319, EPI_ISL_1673320, EPI_ISL_1673321, EPI_ISL_1673322, EPI_ISL_1673323, EPI_ISL_1673324, EPI_ISL_1673325, EPI_ISL_1673326, EPI_ISL_1673327, EPI_ISL_1673328, EPI_ISL_1673329, EPI_ISL_1673330, EPI_ISL_1673331                                                                                                                                                                                                                                                                                                                                                                                                                                                                                                                                                                                                   | see above | Laboratorio de Investigaciones de Baney                                                             | Swiss Tropical and Public Health Institute                                                                                                       | Salome Hosch, Carlos Cortes, Claudia Daubenberger, Guillermo Garcia, Bonifacio Manguire Nlavo, Maximilian Mpina, Elizabeth Nyakarungu, Diosdado Ojama Nseng Ada, Mitoha Ondo O Ayekaba, Tobias Schindler, Philipp Wagner, Philip Wonder Phiri                                                                                                                                                                                 |
| EPI_ISL_1675094, EPI_ISL_1675141                                                                                                                                                                                                                                                                                                                                                                                                                                                                                                                                                                                                                                                                                                                                                                                                                                                                                   |           | Laboratoire Biolimi/FSS/UL                                                                          | Unité Mixte Internationale TransVIHMI (UMI 233 IRD - U1175 INSERM - Université de Montpellier) IRD (Institut de recherche pour le développement) | Mounerou SALOU, Christelle BUTEL, Wembo A. HALATOKO, Amivi EHLAN, Abia A. KONOU, Issaka Maman, Syntyche DEVATCHAGNI, Adodo SADJI, Kokou TEGUENI, Kokou AGBODEKA, Sidonie A.M.KAGNISSODE, Akoélé SILIADIN, Alassane OURO-MEDELI, Messanh DOUFFAN, Déléma MABA, Sika DOSSIM, Améyo DORKENOO, Mireille PRINCE-DAVID, Anoumou DAGNRA, Laetitia SERRANO, Ahidjo AYOUNA, Eric DELAPORTE, Martine PEETERS                            |
| EPI_ISL_1677699, EPI_ISL_1677701, EPI_ISL_1677703, EPI_ISL_1677706, EPI_ISL_1677708, EPI_ISL_1677709, EPI_ISL_1677710, EPI_ISL_1677711, EPI_ISL_1677712, EPI_ISL_1677713, EPI_ISL_1677716, EPI_ISL_1677718, EPI_ISL_1677721, EPI_ISL_1677722, EPI_ISL_1677723, EPI_ISL_1677724, EPI_ISL_1677725, EPI_ISL_1677726, EPI_ISL_1677727, EPI_ISL_1677728, EPI_ISL_1677729, EPI_ISL_1677730, EPI_ISL_1677731, EPI_ISL_1677732, EPI_ISL_1677733, EPI_ISL_1677734, EPI_ISL_1677735, EPI_ISL_1677736, EPI_ISL_1677737, EPI_ISL_1677738                                                                                                                                                                                                                                                                                                                                                                                       | see above | National Health Laboratory                                                                          | Botswana Institute for Technology Research and Innovation                                                                                        | Kefentse Arnold Tumedji, Madisa Mine, Dineo Emang Tshiamo. Tefelo Thela, Gape Nyepetsi, Thongbotho Mphoyakgosi, Malebogo Kebabonye, Maitshwarelo Ignatius Matsheka                                                                                                                                                                                                                                                            |
| EPI_ISL_1697386, EPI_ISL_1697391                                                                                                                                                                                                                                                                                                                                                                                                                                                                                                                                                                                                                                                                                                                                                                                                                                                                                   |           | Iressef / LBV                                                                                       | Iressef Genomics lab                                                                                                                             | Souleymane MBOUP, Abdou PADANE, Khadim GUEYE, Assane DIENG, Papa Alassane DIAW, Anna Julienne Selbe NDIAYE, Birahim Piere NDIAYE, Adjiratou Aissatou BA, Barada Cisse, Mengue FALL, Aminata MBOUP, Pauline SENE, Moustapha MBOW, Serigne Mbaye Lo NDIAYE, Ndeye Coumba Toure KANE, Ailoune TINE, Nafisatou LEYE, Gora LO, SADA DIALLO, Ambroise AHOUJIDI, OUMY DIOP, Astou Gaye GAYE, Aminata DIA, Yacine DIA, Makhtar Camara |
| EPI_ISL_1700676, EPI_ISL_1700677, EPI_ISL_1700678, EPI_ISL_1700679, EPI_ISL_1700680, EPI_ISL_1700681, EPI_ISL_1700682, EPI_ISL_1700683, EPI_ISL_1700684, EPI_ISL_1700685, EPI_ISL_1700686                                                                                                                                                                                                                                                                                                                                                                                                                                                                                                                                                                                                                                                                                                                          | see above | Laboratorio de Investigaciones de Baney                                                             | Swiss Tropical and Public Health Institute                                                                                                       | Salome Hosch, Carlos Cortes, Claudia Daubenberger, Guillermo Garcia, Bonifacio Manguire Nlavo, Maximilian Mpina, Elizabeth Nyakarungu, Diosdado Ojama Nseng Ada, Mitoha Ondo O Ayekaba, Tobias Schindler, Philipp Wagner, Philip Wonder Phiri                                                                                                                                                                                 |
| EPI_ISL_1706551, EPI_ISL_1706552                                                                                                                                                                                                                                                                                                                                                                                                                                                                                                                                                                                                                                                                                                                                                                                                                                                                                   |           | Ampath Cape Town                                                                                    | NHLs/UCT                                                                                                                                         | Arash Iranzadeh, Deelan Doolabh, Jacques Marx, Lynn Tyers, Bruna Galvao, Innocent Mudau, Marvin Hsiao, Kruger Marais, Diana Hardie, Stephen Korsman, Emmanuel SJ, Tegally H, de Oliveira T, Carolyn Williamson                                                                                                                                                                                                                |
| EPI_ISL_1706562, EPI_ISL_1706563, EPI_ISL_1706564, EPI_ISL_1706565, EPI_ISL_1706566, EPI_ISL_1706567, EPI_ISL_1706568, EPI_ISL_1706569, EPI_ISL_1706570, EPI_ISL_1706571, EPI_ISL_1706572, EPI_ISL_1706573, EPI_ISL_1706574, EPI_ISL_1706575, EPI_ISL_1706576                                                                                                                                                                                                                                                                                                                                                                                                                                                                                                                                                                                                                                                      | see above | Groote Schuur Hospital wc GSH                                                                       | NHLs/UCT                                                                                                                                         | Arash Iranzadeh, Deelan Doolabh, Lynn Tyers, Bruna Galvao, Innocent Mudau, Marvin Hsiao, Kruger Marais, Diana Hardie, Stephen Korsman, Emmanuel SJ, Tegally H, de Oliveira T, Carolyn Williamson                                                                                                                                                                                                                              |
| EPI_ISL_1715191, EPI_ISL_1715192, EPI_ISL_1715193, EPI_ISL_1715195, EPI_ISL_1715196, EPI_ISL_1715197, EPI_ISL_1715198, EPI_ISL_1715199, EPI_ISL_1715200                                                                                                                                                                                                                                                                                                                                                                                                                                                                                                                                                                                                                                                                                                                                                            |           | National Public Health Laboratory, Cameroon                                                         | African Centre of Excellence for Genomics of Infectious Diseases, Redeemer's University                                                          | Olawoye, I.B. et al                                                                                                                                                                                                                                                                                                                                                                                                           |
| EPI_ISL_1715364, EPI_ISL_1715365, EPI_ISL_1715366, EPI_ISL_1715367, EPI_ISL_1715368, EPI_ISL_1715369, EPI_ISL_1715370, EPI_ISL_1715371, EPI_ISL_1715372, EPI_ISL_1715373, EPI_ISL_1715374, EPI_ISL_1715375, EPI_ISL_1715376, EPI_ISL_1715377, EPI_ISL_1715378, EPI_ISL_1715379, EPI_ISL_1715380, EPI_ISL_1715381, EPI_ISL_1715382, EPI_ISL_1715383, EPI_ISL_1715384, EPI_ISL_1715385, EPI_ISL_1715386, EPI_ISL_1715387, EPI_ISL_1715388, EPI_ISL_1715389, EPI_ISL_1715390, EPI_ISL_1715391, EPI_ISL_1715392, EPI_ISL_1715393, EPI_ISL_1715394, EPI_ISL_1715395, EPI_ISL_1715396, EPI_ISL_1715397, EPI_ISL_1715398, EPI_ISL_1715399, EPI_ISL_1715400, EPI_ISL_1715401, EPI_ISL_1715402, EPI_ISL_1715403, EPI_ISL_1715404, EPI_ISL_1715405, EPI_ISL_1715406, EPI_ISL_1715407, EPI_ISL_1715408, EPI_ISL_1715409, EPI_ISL_1715410, EPI_ISL_1715411, EPI_ISL_1715412, EPI_ISL_1715413, EPI_ISL_1715414, EPI_ISL_1715415 | see above | Nigerian Centre for Disease Control (NCDC)                                                          | African Centre of Excellence for Genomics of Infectious Diseases, Redeemer's University                                                          | Olawoye, I.B. et al                                                                                                                                                                                                                                                                                                                                                                                                           |
| EPI_ISL_1731557                                                                                                                                                                                                                                                                                                                                                                                                                                                                                                                                                                                                                                                                                                                                                                                                                                                                                                    |           | MRCG at LSHTM Genomics lab                                                                          | MRCG at LSHTM Genomics lab                                                                                                                       | Abdul Karim sesay, Abdoulie Kanteh, Jarra Manneh, Mariama Kujabi, Bakary Sanyang                                                                                                                                                                                                                                                                                                                                              |
| EPI_ISL_1753023, EPI_ISL_1753024, EPI_ISL_1753025                                                                                                                                                                                                                                                                                                                                                                                                                                                                                                                                                                                                                                                                                                                                                                                                                                                                  |           | Laboratorio de Investigaciones de Baney                                                             | Swiss Tropical and Public Health Institute                                                                                                       | Salome Hosch, Carlos Cortes, Claudia Daubenberger, Guillermo Garcia, Bonifacio Manguire Nlavo, Maximilian Mpina, Elizabeth Nyakarungu, Diosdado Ojama Nseng Ada, Mitoha Ondo O Ayekaba, Tobias Schindler, Philipp Wagner, Philip Wonder Phiri                                                                                                                                                                                 |
| EPI_ISL_1760555                                                                                                                                                                                                                                                                                                                                                                                                                                                                                                                                                                                                                                                                                                                                                                                                                                                                                                    |           | Laboratoire Professeur Daniel GAHOUMA (LPDG)                                                        | Centre de recherches médicales de Lambaréné (CERMEL)                                                                                             | Haruka Abe, Yuri Ushijima, Rodrigue Bikangui, Samira Zoa-Assoumou, Georgetin Nguema Ondo, Gédéon P. Manouana, Ayong Moure, Emilio Skarwan, Bénédicte Ndeboko, Rotimi Myrabelle Avome Houeuchenou, Joel Fleury Djoba Siawaya, Bertrand Leli, Ayola A. Adegnika, Jiro Yasuda                                                                                                                                                    |
| EPI_ISL_1760556                                                                                                                                                                                                                                                                                                                                                                                                                                                                                                                                                                                                                                                                                                                                                                                                                                                                                                    |           | Centre Hospitalier Universitaire Mère-Enfant, Fondation Jeanne Ebori (CHUMEFJE)                     | Centre de recherches médicales de Lambaréné (CERMEL)                                                                                             | Haruka Abe, Yuri Ushijima, Rodrigue Bikangui, Samira Zoa-Assoumou, Georgetin Nguema Ondo, Gédéon P. Manouana, Ayong Moure, Emilio Skarwan, Bénédicte Ndeboko, Rotimi Myrabelle Avome Houeuchenou, Joel Fleury Djoba Siawaya, Bertrand Leli, Ayola A. Adegnika, Jiro Yasuda                                                                                                                                                    |
| EPI_ISL_1785562, EPI_ISL_1785563, EPI_ISL_1785564, EPI_ISL_1785565, EPI_ISL_1785569, EPI_ISL_1785570, EPI_ISL_1785571, EPI_ISL_1785572, EPI_ISL_1785573, EPI_ISL_1785574, EPI_ISL_1785575, EPI_ISL_1785576                                                                                                                                                                                                                                                                                                                                                                                                                                                                                                                                                                                                                                                                                                         | see above | Viral Respiratory Lab, National Institute for Biomedical Research (INRB)                            | Pathogen Sequencing Lab, National Institute for Biomedical Research (INRB)                                                                       | Placide Mbala-Kingebeni, Edith Nkwembe, Eddy Kinganda-Lusamaki, Amuri Aziza, Francisca Muyembe Mawete, Emmanuel Lokilo Lofiko, Jean Claude Makangara, Catherine Pratt, Matthias Pauthner, Josh Quick, Allison Black, James Hadfield, Trevor Bedford, Ian Goodfellow, Andrew Rambaut, Nick Loman, Kristian Andersen, Michael Wiley, Steve Ahuka-Mundeke, Jean-Jacques Muyembe Tatumf                                           |
| EPI_ISL_1790063, EPI_ISL_1790064, EPI_ISL_1790065, EPI_ISL_1790066, EPI_ISL_1790067                                                                                                                                                                                                                                                                                                                                                                                                                                                                                                                                                                                                                                                                                                                                                                                                                                |           | Hopital Laquintinie de Douala                                                                       | Institut Pasteur de Dakar                                                                                                                        | Njoum Richard, Diagne Moussa Moïse, Dia Ndongo, Diallo Amadou, Sankhe Safietou, Diop Mamadou, Ndiaye Ndack, Loucoubar Cheikh, Carniel Elisabeth, Faye Ousmane, Sall Amadou Alpha                                                                                                                                                                                                                                              |
| EPI_ISL_1790068, EPI_ISL_1790069, EPI_ISL_1790070, EPI_ISL_1790071, EPI_ISL_1790072, EPI_ISL_1790073                                                                                                                                                                                                                                                                                                                                                                                                                                                                                                                                                                                                                                                                                                                                                                                                               |           | Hopital Général de Douala                                                                           | Institut Pasteur de Dakar                                                                                                                        | Njoum Richard, Diagne Moussa Moïse, Dia Ndongo, Diallo Amadou, Sankhe Safietou, Diop Mamadou, Ndiaye Ndack, Loucoubar Cheikh, Carniel Elisabeth, Faye Ousmane, Sall Amadou Alpha                                                                                                                                                                                                                                              |
| EPI_ISL_1790074, EPI_ISL_1790075, EPI_ISL_1790076                                                                                                                                                                                                                                                                                                                                                                                                                                                                                                                                                                                                                                                                                                                                                                                                                                                                  |           | Laboratoire de Référence de la TB Douala                                                            | Institut Pasteur de Dakar                                                                                                                        | Njoum Richard, Diagne Moussa Moïse, Dia Ndongo, Diallo Amadou, Sankhe Safietou, Diop Mamadou, Ndiaye Ndack, Loucoubar Cheikh, Carniel Elisabeth, Faye Ousmane, Sall Amadou Alpha                                                                                                                                                                                                                                              |
| EPI_ISL_1790090, EPI_ISL_1790091, EPI_ISL_1790092, EPI_ISL_1790093, EPI_ISL_1790094, EPI_ISL_1790095, EPI_ISL_1790096, EPI_ISL_1790097, EPI_ISL_1790098, EPI_ISL_1790099, EPI_ISL_1790101, EPI_ISL_1790102, EPI_ISL_1790103                                                                                                                                                                                                                                                                                                                                                                                                                                                                                                                                                                                                                                                                                        | see above | Centre Pasteur Annexe de Garoua                                                                     | Institut Pasteur de Dakar                                                                                                                        | Njoum Richard, Diagne Moussa Moïse, Dia Ndongo, Diallo Amadou, Sankhe Safietou, Diop Mamadou, Ndiaye Ndack, Loucoubar Cheikh, Carniel Elisabeth, Faye Ousmane, Sall Amadou Alpha                                                                                                                                                                                                                                              |
| EPI_ISL_1790104, EPI_ISL_1790105, EPI_ISL_1790106, EPI_ISL_1790107, EPI_ISL_1790108, EPI_ISL_1790109, EPI_ISL_1790110, EPI_ISL_1790111, EPI_ISL_1790112, EPI_ISL_1790113, EPI_ISL_1790114, EPI_ISL_1790115, EPI_ISL_1790116, EPI_ISL_1790117, EPI_ISL_1790118, EPI_ISL_1790119, EPI_ISL_1790120, EPI_ISL_1790121, EPI_ISL_1790122, EPI_ISL_1790123, EPI_ISL_1790124, EPI_ISL_1790125, EPI_ISL_1790126, EPI_ISL_1790127, EPI_ISL_1790128, EPI_ISL_1790129, EPI_ISL_1790130, EPI_ISL_1790131, EPI_ISL_1790132, EPI_ISL_1790133                                                                                                                                                                                                                                                                                                                                                                                       | see above | Centre Pasteur du Cameroun                                                                          | Institut Pasteur de Dakar                                                                                                                        | Njoum Richard, Diagne Moussa Moïse, Dia Ndongo, Diallo Amadou, Sankhe Safietou, Diop Mamadou, Ndiaye Ndack, Loucoubar Cheikh, Carniel Elisabeth, Faye Ousmane, Sall Amadou Alpha                                                                                                                                                                                                                                              |
| EPI_ISL_1797819, EPI_ISL_1799071, EPI_ISL_1799444, EPI_ISL_1800014, EPI_ISL_1810924, EPI_ISL_1810927,                                                                                                                                                                                                                                                                                                                                                                                                                                                                                                                                                                                                                                                                                                                                                                                                              |           | Laboratoire Biolimi/FSS/UL                                                                          | Unité Mixte Internationale TransVIHMI (UMI 233 IRD - U1175 INSERM - Université de Montpellier) IRD (Institut de recherche pour le développement) | Mounerou SALOU, Christelle BUTEL, Wembo A. HALATOKO, Amivi EHLAN, Abia A. KONOU, Issaka Maman, Syntyche DEVATCHAGNI, Adodo SADJI, Kokou TEGUENI, Kokou AGBODEKA, Sidonie A.M.KAGNISSODE, Akoélé SILIADIN, Alassane OURO-MEDELI, Messanh DOUFFAN, Déléma MABA, Sika DOSSIM, Améyo DORKENOO, Mireille PRINCE-DAVID, Anoumou DAGNRA, Laetitia SERRANO, Ahidjo AYOUNA, Eric DELAPORTE, Martine PEETERS                            |



|                                                                                                                                                                                                                                                                                                                                                                                                                                                                                                                                                                                                                                                                                                                                                                                                                                                                                                                                                                                                                                                                                                                                                                                                                                                                                                                                                                                                                                                                                    |                                                                                                         |                                                                                        |                                                                                                                                                                                                                                                                             |  |
|------------------------------------------------------------------------------------------------------------------------------------------------------------------------------------------------------------------------------------------------------------------------------------------------------------------------------------------------------------------------------------------------------------------------------------------------------------------------------------------------------------------------------------------------------------------------------------------------------------------------------------------------------------------------------------------------------------------------------------------------------------------------------------------------------------------------------------------------------------------------------------------------------------------------------------------------------------------------------------------------------------------------------------------------------------------------------------------------------------------------------------------------------------------------------------------------------------------------------------------------------------------------------------------------------------------------------------------------------------------------------------------------------------------------------------------------------------------------------------|---------------------------------------------------------------------------------------------------------|----------------------------------------------------------------------------------------|-----------------------------------------------------------------------------------------------------------------------------------------------------------------------------------------------------------------------------------------------------------------------------|--|
| EPI_ISL_1810929                                                                                                                                                                                                                                                                                                                                                                                                                                                                                                                                                                                                                                                                                                                                                                                                                                                                                                                                                                                                                                                                                                                                                                                                                                                                                                                                                                                                                                                                    |                                                                                                         |                                                                                        |                                                                                                                                                                                                                                                                             |  |
| EPI_ISL_1810933, EPI_ISL_1810934, EPI_ISL_1810935                                                                                                                                                                                                                                                                                                                                                                                                                                                                                                                                                                                                                                                                                                                                                                                                                                                                                                                                                                                                                                                                                                                                                                                                                                                                                                                                                                                                                                  | Laboratoire central de Virologie                                                                        | Laboratoire de Biotechnologie                                                          | Tarik Aanniz, Mouna Ouadghiri, Abdelmunim Essabbar, Ghizlane EL Amin, Amal Zouaki, Myriam Seffar, Hakima Kabbaj, Saaïd Amzazi, Lahcen Belyamani and Azeddine Ibrahim                                                                                                        |  |
| EPI_ISL_1810936, EPI_ISL_1810937                                                                                                                                                                                                                                                                                                                                                                                                                                                                                                                                                                                                                                                                                                                                                                                                                                                                                                                                                                                                                                                                                                                                                                                                                                                                                                                                                                                                                                                   | Laboratoire central de Virologie                                                                        | Laboratoire de Biotechnologie                                                          | Mouna Ouadghiri, Tarik Aanniz, Abdelmunim Essabbar, Ghizlane EL Amin, Amal Zouaki, Myriam Seffar, Hakima Kabbaj, Saaïd Amzazi, Lahcen Belyamani and Azeddine Ibrahim                                                                                                        |  |
| EPI_ISL_1810938, EPI_ISL_1810944                                                                                                                                                                                                                                                                                                                                                                                                                                                                                                                                                                                                                                                                                                                                                                                                                                                                                                                                                                                                                                                                                                                                                                                                                                                                                                                                                                                                                                                   | Laboratoire central de Virologie                                                                        | Laboratoire de Biotechnologie                                                          | Tarik Aanniz, Mouna Ouadghiri, Abdelmunim Essabbar, Ghizlane EL Amin, Amal Zouaki, Myriam Seffar, Hakima Kabbaj, Saaïd Amzazi, Lahcen Belyamani and Azeddine Ibrahim                                                                                                        |  |
| EPI_ISL_1810947                                                                                                                                                                                                                                                                                                                                                                                                                                                                                                                                                                                                                                                                                                                                                                                                                                                                                                                                                                                                                                                                                                                                                                                                                                                                                                                                                                                                                                                                    | Laboratoire central de Virologie                                                                        | Laboratoire de Biotechnologie                                                          | Mouna Ouadghiri, Tarik Aanniz, Abdelmunim Essabbar, Ghizlane EL Amin, Amal Zouaki, Myriam Seffar, Hakima Kabbaj, Saaïd Amzazi, Lahcen Belyamani and Azeddine Ibrahim                                                                                                        |  |
| EPI_ISL_1810948                                                                                                                                                                                                                                                                                                                                                                                                                                                                                                                                                                                                                                                                                                                                                                                                                                                                                                                                                                                                                                                                                                                                                                                                                                                                                                                                                                                                                                                                    | Laboratoire central de Virologie                                                                        | Laboratoire de Biotechnologie                                                          | Tarik Aanniz, Mouna Ouadghiri, Abdelmunim Essabbar, Ghizlane EL Amin, Amal Zouaki, Myriam Seffar, Hakima Kabbaj, Saaïd Amzazi, Lahcen Belyamani and Azeddine Ibrahim                                                                                                        |  |
| EPI_ISL_1810949                                                                                                                                                                                                                                                                                                                                                                                                                                                                                                                                                                                                                                                                                                                                                                                                                                                                                                                                                                                                                                                                                                                                                                                                                                                                                                                                                                                                                                                                    | Laboratoire central de Virologie                                                                        | Laboratoire de Biotechnologie                                                          | Mouna Ouadghiri, Tarik Aanniz, Abdelmunim Essabbar, Ghizlane EL Amin, Amal Zouaki, Myriam Seffar, Hakima Kabbaj, Saaïd Amzazi, Lahcen Belyamani and Azeddine Ibrahim                                                                                                        |  |
| EPI_ISL_1811221, EPI_ISL_1811222                                                                                                                                                                                                                                                                                                                                                                                                                                                                                                                                                                                                                                                                                                                                                                                                                                                                                                                                                                                                                                                                                                                                                                                                                                                                                                                                                                                                                                                   | Laboratoire central de Virologie                                                                        | Laboratoire de Biotechnologie                                                          | Tarik Aanniz, Mouna Ouadghiri, Abdelmunim Essabbar, Ghizlane EL Amin, Amal Zouaki, Myriam Seffar, Hakima Kabbaj, Saaïd Amzazi, Lahcen Belyamani and Azeddine Ibrahim                                                                                                        |  |
| EPI_ISL_1817665                                                                                                                                                                                                                                                                                                                                                                                                                                                                                                                                                                                                                                                                                                                                                                                                                                                                                                                                                                                                                                                                                                                                                                                                                                                                                                                                                                                                                                                                    | Groote Schuur Hospital wc GSH                                                                           | NHLS/UCT                                                                               | Arash Iranzadeh, Deelan Doolabh, Lynn Tyers, Bruna Galvao, Innocent Mudau, Marvin Hsiao, Kruger Marais, Diana Hardie, Stephen Korsman, Carolyn Williamson                                                                                                                   |  |
| EPI_ISL_1817674                                                                                                                                                                                                                                                                                                                                                                                                                                                                                                                                                                                                                                                                                                                                                                                                                                                                                                                                                                                                                                                                                                                                                                                                                                                                                                                                                                                                                                                                    | Victoria Hospital wc VHW                                                                                | NHLS/UCT                                                                               | Arash Iranzadeh, Deelan Doolabh, Lynn Tyers, Bruna Galvao, Innocent Mudau, Marvin Hsiao, Kruger Marais, Diana Hardie, Stephen Korsman, Carolyn Williamson                                                                                                                   |  |
| EPI_ISL_1817676                                                                                                                                                                                                                                                                                                                                                                                                                                                                                                                                                                                                                                                                                                                                                                                                                                                                                                                                                                                                                                                                                                                                                                                                                                                                                                                                                                                                                                                                    | Calvinia RSC Clinic                                                                                     | NHLS/UCT                                                                               | Arash Iranzadeh, Deelan Doolabh, Lynn Tyers, Bruna Galvao, Innocent Mudau, Marvin Hsiao, Kruger Marais, Diana Hardie, Stephen Korsman, Carolyn Williamson                                                                                                                   |  |
| EPI_ISL_1817680                                                                                                                                                                                                                                                                                                                                                                                                                                                                                                                                                                                                                                                                                                                                                                                                                                                                                                                                                                                                                                                                                                                                                                                                                                                                                                                                                                                                                                                                    | Knysna Hospital wc KNY                                                                                  | NHLS/UCT                                                                               | Arash Iranzadeh, Deelan Doolabh, Lynn Tyers, Bruna Galvao, Innocent Mudau, Marvin Hsiao, Kruger Marais, Diana Hardie, Stephen Korsman, Carolyn Williamson                                                                                                                   |  |
| EPI_ISL_1817684                                                                                                                                                                                                                                                                                                                                                                                                                                                                                                                                                                                                                                                                                                                                                                                                                                                                                                                                                                                                                                                                                                                                                                                                                                                                                                                                                                                                                                                                    | False Bay Hospital wc FBH                                                                               | NHLS/UCT                                                                               | Arash Iranzadeh, Deelan Doolabh, Lynn Tyers, Bruna Galvao, Innocent Mudau, Marvin Hsiao, Kruger Marais, Diana Hardie, Stephen Korsman, Carolyn Williamson                                                                                                                   |  |
| EPI_ISL_1817687                                                                                                                                                                                                                                                                                                                                                                                                                                                                                                                                                                                                                                                                                                                                                                                                                                                                                                                                                                                                                                                                                                                                                                                                                                                                                                                                                                                                                                                                    | Ladismith (Alan Blyth) Hosp wc ABH                                                                      | NHLS/UCT                                                                               | Arash Iranzadeh, Deelan Doolabh, Lynn Tyers, Bruna Galvao, Innocent Mudau, Marvin Hsiao, Kruger Marais, Diana Hardie, Stephen Korsman, Carolyn Williamson                                                                                                                   |  |
| EPI_ISL_1817688                                                                                                                                                                                                                                                                                                                                                                                                                                                                                                                                                                                                                                                                                                                                                                                                                                                                                                                                                                                                                                                                                                                                                                                                                                                                                                                                                                                                                                                                    | D'Almeida Clinic wc DAL                                                                                 | NHLS/UCT                                                                               | Arash Iranzadeh, Deelan Doolabh, Lynn Tyers, Bruna Galvao, Innocent Mudau, Marvin Hsiao, Kruger Marais, Diana Hardie, Stephen Korsman, Carolyn Williamson                                                                                                                   |  |
| EPI_ISL_1817690, EPI_ISL_1817692                                                                                                                                                                                                                                                                                                                                                                                                                                                                                                                                                                                                                                                                                                                                                                                                                                                                                                                                                                                                                                                                                                                                                                                                                                                                                                                                                                                                                                                   | Victoria Hospital wc VHW                                                                                | NHLS/UCT                                                                               | Arash Iranzadeh, Deelan Doolabh, Lynn Tyers, Bruna Galvao, Innocent Mudau, Marvin Hsiao, Kruger Marais, Diana Hardie, Stephen Korsman, Carolyn Williamson                                                                                                                   |  |
| EPI_ISL_1817694                                                                                                                                                                                                                                                                                                                                                                                                                                                                                                                                                                                                                                                                                                                                                                                                                                                                                                                                                                                                                                                                                                                                                                                                                                                                                                                                                                                                                                                                    | Groote Schuur Hospital wc GSH                                                                           | NHLS/UCT                                                                               | Arash Iranzadeh, Deelan Doolabh, Lynn Tyers, Bruna Galvao, Innocent Mudau, Marvin Hsiao, Kruger Marais, Diana Hardie, Stephen Korsman, Carolyn Williamson                                                                                                                   |  |
| EPI_ISL_1817706                                                                                                                                                                                                                                                                                                                                                                                                                                                                                                                                                                                                                                                                                                                                                                                                                                                                                                                                                                                                                                                                                                                                                                                                                                                                                                                                                                                                                                                                    | D'Almeida Clinic wc DAL                                                                                 | NHLS/UCT                                                                               | Arash Iranzadeh, Deelan Doolabh, Lynn Tyers, Bruna Galvao, Innocent Mudau, Marvin Hsiao, Kruger Marais, Diana Hardie, Stephen Korsman, Carolyn Williamson                                                                                                                   |  |
| EPI_ISL_1817707                                                                                                                                                                                                                                                                                                                                                                                                                                                                                                                                                                                                                                                                                                                                                                                                                                                                                                                                                                                                                                                                                                                                                                                                                                                                                                                                                                                                                                                                    | Conville CDC wc CVC                                                                                     | NHLS/UCT                                                                               | Arash Iranzadeh, Deelan Doolabh, Lynn Tyers, Bruna Galvao, Innocent Mudau, Marvin Hsiao, Kruger Marais, Diana Hardie, Stephen Korsman, Carolyn Williamson                                                                                                                   |  |
| EPI_ISL_1817720, EPI_ISL_1817723, EPI_ISL_1817725, EPI_ISL_1817728, EPI_ISL_1817732                                                                                                                                                                                                                                                                                                                                                                                                                                                                                                                                                                                                                                                                                                                                                                                                                                                                                                                                                                                                                                                                                                                                                                                                                                                                                                                                                                                                | Calvinia RSC Clinic                                                                                     | NHLS/UCT                                                                               | Arash Iranzadeh, Deelan Doolabh, Lynn Tyers, Bruna Galvao, Innocent Mudau, Marvin Hsiao, Kruger Marais, Diana Hardie, Stephen Korsman, Carolyn Williamson                                                                                                                   |  |
| EPI_ISL_1817736                                                                                                                                                                                                                                                                                                                                                                                                                                                                                                                                                                                                                                                                                                                                                                                                                                                                                                                                                                                                                                                                                                                                                                                                                                                                                                                                                                                                                                                                    | Mitchells Plain Hospital wc MPH                                                                         | NHLS/UCT                                                                               | Arash Iranzadeh, Deelan Doolabh, Lynn Tyers, Bruna Galvao, Innocent Mudau, Marvin Hsiao, Kruger Marais, Diana Hardie, Stephen Korsman, Carolyn Williamson                                                                                                                   |  |
| EPI_ISL_1817752                                                                                                                                                                                                                                                                                                                                                                                                                                                                                                                                                                                                                                                                                                                                                                                                                                                                                                                                                                                                                                                                                                                                                                                                                                                                                                                                                                                                                                                                    | Heideveld Emergency Centre                                                                              | NHLS/UCT                                                                               | Arash Iranzadeh, Deelan Doolabh, Lynn Tyers, Bruna Galvao, Innocent Mudau, Marvin Hsiao, Kruger Marais, Diana Hardie, Stephen Korsman, Carolyn Williamson                                                                                                                   |  |
| EPI_ISL_1817782, EPI_ISL_1817783, EPI_ISL_1817855, EPI_ISL_1817857                                                                                                                                                                                                                                                                                                                                                                                                                                                                                                                                                                                                                                                                                                                                                                                                                                                                                                                                                                                                                                                                                                                                                                                                                                                                                                                                                                                                                 | National Health Laboratory Service, South Africa                                                        | KRISP, KZN Research Innovation and Sequencing Platform                                 | Giandhari J, Pillay S, Naidoo Y, Ramphal U, Lessells R, Mdlalose K, York D, Khan S, Emmanuel SJ, Tegally H, Wilkinson E, de Oliveira T                                                                                                                                      |  |
| EPI_ISL_1818854, EPI_ISL_1818855, EPI_ISL_1818856, EPI_ISL_1818857, EPI_ISL_1818858, EPI_ISL_1818859, EPI_ISL_1818860, EPI_ISL_1818861, EPI_ISL_1818862, EPI_ISL_1818863, EPI_ISL_1818864, EPI_ISL_1818865, EPI_ISL_1818866, EPI_ISL_1818867, EPI_ISL_1818868, EPI_ISL_1818869, EPI_ISL_1818870, EPI_ISL_1818871, EPI_ISL_1818872, EPI_ISL_1818873, EPI_ISL_1818874, EPI_ISL_1818875, EPI_ISL_1818876, EPI_ISL_1818877, EPI_ISL_1818878, EPI_ISL_1818879, EPI_ISL_1818880, EPI_ISL_1818881, EPI_ISL_1818882, EPI_ISL_1818883, EPI_ISL_1818884, EPI_ISL_1818885, EPI_ISL_1818886, EPI_ISL_1818887, EPI_ISL_1818888, EPI_ISL_1818889, EPI_ISL_1818890, EPI_ISL_1818891, EPI_ISL_1818892, EPI_ISL_1818893, EPI_ISL_1818894, EPI_ISL_1818895, EPI_ISL_1818896, EPI_ISL_1818897, EPI_ISL_1818898, EPI_ISL_1818899, EPI_ISL_1818900, EPI_ISL_1818901, EPI_ISL_1818902, EPI_ISL_1818903, EPI_ISL_1818904, EPI_ISL_1818905, EPI_ISL_1818906, EPI_ISL_1818907, EPI_ISL_1818908, EPI_ISL_1818909, EPI_ISL_1818910, EPI_ISL_1818911, EPI_ISL_1818912, EPI_ISL_1818913, EPI_ISL_1818914, EPI_ISL_1818915, EPI_ISL_1818916, EPI_ISL_1818917, EPI_ISL_1818918, EPI_ISL_1818919, EPI_ISL_1818920, EPI_ISL_1818921, EPI_ISL_1818922, EPI_ISL_1818923, EPI_ISL_1818924, EPI_ISL_1818925, EPI_ISL_1818926, EPI_ISL_1818927, EPI_ISL_1818928, EPI_ISL_1818929, EPI_ISL_1818930, EPI_ISL_1818931, EPI_ISL_1818932, EPI_ISL_1818933, EPI_ISL_1818934, EPI_ISL_1818935, EPI_ISL_1818936, EPI_ISL_1818937 |                                                                                                         |                                                                                        | PA Bester, MM Nyaga, P Nthiga, MT Mogotsi, Emmanuel Ogunbayo, D Goedhals, T de Oliveira                                                                                                                                                                                     |  |
| see above                                                                                                                                                                                                                                                                                                                                                                                                                                                                                                                                                                                                                                                                                                                                                                                                                                                                                                                                                                                                                                                                                                                                                                                                                                                                                                                                                                                                                                                                          | NHLS Universitas Academic                                                                               | UFS Virology                                                                           |                                                                                                                                                                                                                                                                             |  |
| EPI_ISL_1819026, EPI_ISL_1819027, EPI_ISL_1819028, EPI_ISL_1819029, EPI_ISL_1819030, EPI_ISL_1819031, EPI_ISL_1819032, EPI_ISL_1819033, EPI_ISL_1819034, EPI_ISL_1819035, EPI_ISL_1819036, EPI_ISL_1819037, EPI_ISL_1819038, EPI_ISL_1819039, EPI_ISL_1819040, EPI_ISL_1819041, EPI_ISL_1819042, EPI_ISL_1819043, EPI_ISL_1819044                                                                                                                                                                                                                                                                                                                                                                                                                                                                                                                                                                                                                                                                                                                                                                                                                                                                                                                                                                                                                                                                                                                                                  |                                                                                                         |                                                                                        |                                                                                                                                                                                                                                                                             |  |
| see above                                                                                                                                                                                                                                                                                                                                                                                                                                                                                                                                                                                                                                                                                                                                                                                                                                                                                                                                                                                                                                                                                                                                                                                                                                                                                                                                                                                                                                                                          | Centre Hospitalier Universitaire Mère-Enfant Fondation Jeanne Ebori (CHUMEFJE)                          | Centre de recherches médicales de Lambaréné (CERMEL)                                   | Haruka Abe, Yuri Ushijima, Rodrigue Bikangui, Samira Zoa-Assoumou, Georjelin Nguema Ondo, Gédéon P. Manouana, Ayong Moure, Emilio Skarwan, Bénédicte Ndeboko, Rotimi Myrabelle Avome Houecheunou, Joel Fleury Djoba Siawaya, Bertrand Leli, Ayola A. Adegnikka, Jiro Yasuda |  |
| EPI_ISL_1822602, EPI_ISL_1822603, EPI_ISL_1822604                                                                                                                                                                                                                                                                                                                                                                                                                                                                                                                                                                                                                                                                                                                                                                                                                                                                                                                                                                                                                                                                                                                                                                                                                                                                                                                                                                                                                                  | Institute for Health Research, Epidemiological Surveillance and Training (IRESSEF)                      | Abbott Laboratories                                                                    | Souleymane Mboup, Ambroise Ahouidi, Abdou Padane, Nafissatou Leye, Moustapha Mbou, Aminata Mboup, Papa Alassane Diaw, Cyrille Diedhiou, Aminata Dia, Anna julienne selbe Ndiaye, Ndeye Diabou Diagne, Ana Olivo, Todd Meyer, Barbara Harris, Mary Rodgers, Gavin Cloherty   |  |
| EPI_ISL_1822607                                                                                                                                                                                                                                                                                                                                                                                                                                                                                                                                                                                                                                                                                                                                                                                                                                                                                                                                                                                                                                                                                                                                                                                                                                                                                                                                                                                                                                                                    | IRSESSEF                                                                                                | Abbott                                                                                 | Souleymane Mboup, Ambroise Ahouidi, Abdou Padane, Nafissatou Leye, Moustapha Mbou, Aminata Mboup, Papa Alassane Diaw, Cyrille Diedhiou, Aminata Dia, Anna julienne selbe Ndiaye, Ndeye Diabou Diagne, Ana Olivo, Todd Meyer, Barbara Harris, Mary Rodgers, Gavin Cloherty   |  |
| EPI_ISL_1827555, EPI_ISL_1827556, EPI_ISL_1827557, EPI_ISL_1827558, EPI_ISL_1827559, EPI_ISL_1827560, EPI_ISL_1827561, EPI_ISL_1827562, EPI_ISL_1827563, EPI_ISL_1827564, EPI_ISL_1827565, EPI_ISL_1827566, EPI_ISL_1827567, EPI_ISL_1827568, EPI_ISL_1827569, EPI_ISL_1827570, EPI_ISL_1827571, EPI_ISL_1827572, EPI_ISL_1827573, EPI_ISL_1827574, EPI_ISL_1827575, EPI_ISL_1827576, EPI_ISL_1827577, EPI_ISL_1827578, EPI_ISL_1827579, EPI_ISL_1827580, EPI_ISL_1827581, EPI_ISL_1827582, EPI_ISL_1827583, EPI_ISL_1827584, EPI_ISL_1827585, EPI_ISL_1827586, EPI_ISL_1827587, EPI_ISL_1827588, EPI_ISL_1827589, EPI_ISL_1827590, EPI_ISL_1827591, EPI_ISL_1827592, EPI_ISL_1827593, EPI_ISL_1827594, EPI_ISL_1827595, EPI_ISL_1827596, EPI_ISL_1827597, EPI_ISL_1827598, EPI_ISL_1827599, EPI_ISL_1827600, EPI_ISL_1827601, EPI_ISL_1827602, EPI_ISL_1827603, EPI_ISL_1827604, EPI_ISL_1827605, EPI_ISL_1827606, EPI_ISL_1827607, EPI_ISL_1827608, EPI_ISL_1827609, EPI_ISL_1827610, EPI_ISL_1827611, EPI_ISL_1827612, EPI_ISL_1827613, EPI_ISL_1827614, EPI_ISL_1827615, EPI_ISL_1827616, EPI_ISL_1827617, EPI_ISL_1827618, EPI_ISL_1827619, EPI_ISL_1827620, EPI_ISL_1827621, EPI_ISL_1827622, EPI_ISL_1827623, EPI_ISL_1827624, EPI_ISL_1827625, EPI_ISL_1827626, EPI_ISL_1827627, EPI_ISL_1827628, EPI_ISL_1827629, EPI_ISL_1827630, EPI_ISL_1827631, EPI_ISL_1827633                                                                                                       |                                                                                                         |                                                                                        | Amoako DG, Scheepers C, Mohale T, Ntuli N, Mahlangu B, Ismail A, Bhiman JN                                                                                                                                                                                                  |  |
| see above                                                                                                                                                                                                                                                                                                                                                                                                                                                                                                                                                                                                                                                                                                                                                                                                                                                                                                                                                                                                                                                                                                                                                                                                                                                                                                                                                                                                                                                                          | National Institute for Communicable Diseases.National Health Laboratory Services, Gauteng, South Africa | National Institute for Communicable Diseases of the National Health Laboratory Service |                                                                                                                                                                                                                                                                             |  |
| EPI_ISL_1827698                                                                                                                                                                                                                                                                                                                                                                                                                                                                                                                                                                                                                                                                                                                                                                                                                                                                                                                                                                                                                                                                                                                                                                                                                                                                                                                                                                                                                                                                    | Manzana                                                                                                 | National Institute for Communicable Diseases of the National Health Laboratory Service | Maphalala GP, Amoako DG, Scheepers C, Mohale T, Ntuli N, Mahlangu B, Ismail A, Bhiman JN                                                                                                                                                                                    |  |
| EPI_ISL_1827699                                                                                                                                                                                                                                                                                                                                                                                                                                                                                                                                                                                                                                                                                                                                                                                                                                                                                                                                                                                                                                                                                                                                                                                                                                                                                                                                                                                                                                                                    | Lobamba                                                                                                 | National Institute for Communicable Diseases of the National Health Laboratory Service | Maphalala GP, Amoako DG, Scheepers C, Mohale T, Ntuli N, Mahlangu B, Ismail A, Bhiman JN                                                                                                                                                                                    |  |

|                                                                                                                                                                                                                                                                                                                                                                                                                                                                                                                                                                                                                                                                                                                                                                                                                                                                                                                                                                                                                                                                                                                                                                                                                                                                                                                                                                                                                                 |                                                                                                                                                                                                                                                                                                                                                                                                                                                                                                                                                                                                                                                                                                                                                                                                                                                                                                                                                                                                                                                                                                                                                                                                                                                                                                                                                                                                                                                                                                                                                                                                                                                                                                                                                                                                                                                                                                                                                                                                                                                                                                                                                                                                                                                                                                                   |                                                                                                         |                                                                                                                |                                                                                                                                                                                                                                                                                                        |
|---------------------------------------------------------------------------------------------------------------------------------------------------------------------------------------------------------------------------------------------------------------------------------------------------------------------------------------------------------------------------------------------------------------------------------------------------------------------------------------------------------------------------------------------------------------------------------------------------------------------------------------------------------------------------------------------------------------------------------------------------------------------------------------------------------------------------------------------------------------------------------------------------------------------------------------------------------------------------------------------------------------------------------------------------------------------------------------------------------------------------------------------------------------------------------------------------------------------------------------------------------------------------------------------------------------------------------------------------------------------------------------------------------------------------------|-------------------------------------------------------------------------------------------------------------------------------------------------------------------------------------------------------------------------------------------------------------------------------------------------------------------------------------------------------------------------------------------------------------------------------------------------------------------------------------------------------------------------------------------------------------------------------------------------------------------------------------------------------------------------------------------------------------------------------------------------------------------------------------------------------------------------------------------------------------------------------------------------------------------------------------------------------------------------------------------------------------------------------------------------------------------------------------------------------------------------------------------------------------------------------------------------------------------------------------------------------------------------------------------------------------------------------------------------------------------------------------------------------------------------------------------------------------------------------------------------------------------------------------------------------------------------------------------------------------------------------------------------------------------------------------------------------------------------------------------------------------------------------------------------------------------------------------------------------------------------------------------------------------------------------------------------------------------------------------------------------------------------------------------------------------------------------------------------------------------------------------------------------------------------------------------------------------------------------------------------------------------------------------------------------------------|---------------------------------------------------------------------------------------------------------|----------------------------------------------------------------------------------------------------------------|--------------------------------------------------------------------------------------------------------------------------------------------------------------------------------------------------------------------------------------------------------------------------------------------------------|
| EPI_ISL_1827700                                                                                                                                                                                                                                                                                                                                                                                                                                                                                                                                                                                                                                                                                                                                                                                                                                                                                                                                                                                                                                                                                                                                                                                                                                                                                                                                                                                                                 | Manzana                                                                                                                                                                                                                                                                                                                                                                                                                                                                                                                                                                                                                                                                                                                                                                                                                                                                                                                                                                                                                                                                                                                                                                                                                                                                                                                                                                                                                                                                                                                                                                                                                                                                                                                                                                                                                                                                                                                                                                                                                                                                                                                                                                                                                                                                                                           | National Institute for Communicable Diseases of the National Health Laboratory Service                  | Maphalala GP, Amoako DG, Scheepers C, Mohale T, Ntuli N, Mahlangu B, Ismail A, Bhiman JN                       |                                                                                                                                                                                                                                                                                                        |
| EPI_ISL_1827701, EPI_ISL_1827702, EPI_ISL_1827703                                                                                                                                                                                                                                                                                                                                                                                                                                                                                                                                                                                                                                                                                                                                                                                                                                                                                                                                                                                                                                                                                                                                                                                                                                                                                                                                                                               | Lobamba                                                                                                                                                                                                                                                                                                                                                                                                                                                                                                                                                                                                                                                                                                                                                                                                                                                                                                                                                                                                                                                                                                                                                                                                                                                                                                                                                                                                                                                                                                                                                                                                                                                                                                                                                                                                                                                                                                                                                                                                                                                                                                                                                                                                                                                                                                           | National Institute for Communicable Diseases of the National Health Laboratory Service                  | Maphalala GP, Amoako DG, Scheepers C, Mohale T, Ntuli N, Mahlangu B, Ismail A, Bhiman JN                       |                                                                                                                                                                                                                                                                                                        |
| EPI_ISL_1827704                                                                                                                                                                                                                                                                                                                                                                                                                                                                                                                                                                                                                                                                                                                                                                                                                                                                                                                                                                                                                                                                                                                                                                                                                                                                                                                                                                                                                 | Manzana                                                                                                                                                                                                                                                                                                                                                                                                                                                                                                                                                                                                                                                                                                                                                                                                                                                                                                                                                                                                                                                                                                                                                                                                                                                                                                                                                                                                                                                                                                                                                                                                                                                                                                                                                                                                                                                                                                                                                                                                                                                                                                                                                                                                                                                                                                           | National Institute for Communicable Diseases of the National Health Laboratory Service                  | Maphalala GP, Amoako DG, Scheepers C, Mohale T, Ntuli N, Mahlangu B, Ismail A, Bhiman JN                       |                                                                                                                                                                                                                                                                                                        |
| EPI_ISL_1827858, EPI_ISL_1827859, EPI_ISL_1827860, EPI_ISL_1827863, EPI_ISL_1827873, EPI_ISL_1827880, EPI_ISL_1827887, EPI_ISL_1827888, EPI_ISL_1827893, EPI_ISL_1827896, EPI_ISL_1827897, EPI_ISL_1827904, EPI_ISL_1827905, EPI_ISL_1827909, EPI_ISL_1827917, EPI_ISL_1827921, EPI_ISL_1827927, EPI_ISL_1827943, EPI_ISL_1827944, EPI_ISL_1827945, EPI_ISL_1827949                                                                                                                                                                                                                                                                                                                                                                                                                                                                                                                                                                                                                                                                                                                                                                                                                                                                                                                                                                                                                                                             | see above                                                                                                                                                                                                                                                                                                                                                                                                                                                                                                                                                                                                                                                                                                                                                                                                                                                                                                                                                                                                                                                                                                                                                                                                                                                                                                                                                                                                                                                                                                                                                                                                                                                                                                                                                                                                                                                                                                                                                                                                                                                                                                                                                                                                                                                                                                         | Institute for Health Research, Epidemiological Surveillance and Training (IRESSEF)                      | Abbott Laboratories                                                                                            |                                                                                                                                                                                                                                                                                                        |
| EPI_ISL_1827950                                                                                                                                                                                                                                                                                                                                                                                                                                                                                                                                                                                                                                                                                                                                                                                                                                                                                                                                                                                                                                                                                                                                                                                                                                                                                                                                                                                                                 | see above                                                                                                                                                                                                                                                                                                                                                                                                                                                                                                                                                                                                                                                                                                                                                                                                                                                                                                                                                                                                                                                                                                                                                                                                                                                                                                                                                                                                                                                                                                                                                                                                                                                                                                                                                                                                                                                                                                                                                                                                                                                                                                                                                                                                                                                                                                         | Institute for Health Research, Epidemiological Surveillance and Training (IRESSEF)                      | Abbott                                                                                                         |                                                                                                                                                                                                                                                                                                        |
| EPI_ISL_1840862, EPI_ISL_1840863, EPI_ISL_1840864, EPI_ISL_1840865, EPI_ISL_1854755, EPI_ISL_1854756, EPI_ISL_1854757, EPI_ISL_1854758, EPI_ISL_1854759, EPI_ISL_1854760, EPI_ISL_1854761, EPI_ISL_1854762, EPI_ISL_1854763, EPI_ISL_1854764, EPI_ISL_1854765, EPI_ISL_1854766, EPI_ISL_1854767, EPI_ISL_1854768, EPI_ISL_1854769, EPI_ISL_1854770, EPI_ISL_1854771, EPI_ISL_1854772, EPI_ISL_1854773, EPI_ISL_1854774, EPI_ISL_1854775, EPI_ISL_1854776, EPI_ISL_1854777, EPI_ISL_1854778, EPI_ISL_1854779, EPI_ISL_1854780, EPI_ISL_1854781, EPI_ISL_1854782, EPI_ISL_1854783, EPI_ISL_1854784, EPI_ISL_1854785, EPI_ISL_1854786, EPI_ISL_1854787, EPI_ISL_1854788, EPI_ISL_1854789, EPI_ISL_1854790, EPI_ISL_1854791, EPI_ISL_1854792, EPI_ISL_1854793, EPI_ISL_1857277, EPI_ISL_1857278, EPI_ISL_1857279, EPI_ISL_1857280, EPI_ISL_1857283, EPI_ISL_1857284, EPI_ISL_1857285, EPI_ISL_1857286                                                                                                                                                                                                                                                                                                                                                                                                                                                                                                                               | see above                                                                                                                                                                                                                                                                                                                                                                                                                                                                                                                                                                                                                                                                                                                                                                                                                                                                                                                                                                                                                                                                                                                                                                                                                                                                                                                                                                                                                                                                                                                                                                                                                                                                                                                                                                                                                                                                                                                                                                                                                                                                                                                                                                                                                                                                                                         | Fondation Congolaise pour la recherche medicale (FCRM), Francine Ntumi                                  | Institute of Tropical Medicine                                                                                 | Prof. Francine Ntumi; Prof. Dr. Thirumalaisamy P. Velavan; Mfoutou Mapanguy Claujeans Chastel and Batchi-Bouyou Armel Landry                                                                                                                                                                           |
| EPI_ISL_1896670                                                                                                                                                                                                                                                                                                                                                                                                                                                                                                                                                                                                                                                                                                                                                                                                                                                                                                                                                                                                                                                                                                                                                                                                                                                                                                                                                                                                                 | EPI_ISL_1897644, EPI_ISL_1897646, EPI_ISL_1897648, EPI_ISL_1897884, EPI_ISL_1898258, EPI_ISL_1898554, EPI_ISL_1898814, EPI_ISL_1899047, EPI_ISL_1899281, EPI_ISL_1899485                                                                                                                                                                                                                                                                                                                                                                                                                                                                                                                                                                                                                                                                                                                                                                                                                                                                                                                                                                                                                                                                                                                                                                                                                                                                                                                                                                                                                                                                                                                                                                                                                                                                                                                                                                                                                                                                                                                                                                                                                                                                                                                                          | Institut National d'Hygiène                                                                             | Laboratoire de Biotechnologie                                                                                  | Mouna Ouadghiri, Tarik Aanniz, Abdelmunim Essabbar, Saaïd Amzazi, Lahcen Belyamani and Azeddine Ibrahim                                                                                                                                                                                                |
| EPI_ISL_1909253                                                                                                                                                                                                                                                                                                                                                                                                                                                                                                                                                                                                                                                                                                                                                                                                                                                                                                                                                                                                                                                                                                                                                                                                                                                                                                                                                                                                                 | EPI_ISL_1912936, EPI_ISL_1912937, EPI_ISL_1913009, EPI_ISL_1913014, EPI_ISL_1913018, EPI_ISL_1913024, EPI_ISL_1913026                                                                                                                                                                                                                                                                                                                                                                                                                                                                                                                                                                                                                                                                                                                                                                                                                                                                                                                                                                                                                                                                                                                                                                                                                                                                                                                                                                                                                                                                                                                                                                                                                                                                                                                                                                                                                                                                                                                                                                                                                                                                                                                                                                                             | Ethiopian Biotechnology Institute (EBTI)                                                                | International Centre for Genetic Engineering and Biotechnology (ICGEB) and ARGO Open Lab for Genome Sequencing | Molalegne Bitew, Getnet Hailu, Keyru Tuki, Kominist Asmamaw, Kassahun Tesfaye, Hailu Dadi, Yakob Gebregziabher Tsegay, Emanuele Orsini, Simeone Dal Monego, Danilo Licastro, Alessandro Marcello                                                                                                       |
| EPI_ISL_1913028                                                                                                                                                                                                                                                                                                                                                                                                                                                                                                                                                                                                                                                                                                                                                                                                                                                                                                                                                                                                                                                                                                                                                                                                                                                                                                                                                                                                                 | EPI_ISL_1913035                                                                                                                                                                                                                                                                                                                                                                                                                                                                                                                                                                                                                                                                                                                                                                                                                                                                                                                                                                                                                                                                                                                                                                                                                                                                                                                                                                                                                                                                                                                                                                                                                                                                                                                                                                                                                                                                                                                                                                                                                                                                                                                                                                                                                                                                                                   | Institut National d'Hygiène                                                                             | Laboratoire de Biotechnologie                                                                                  | Mouna Ouadghiri, Tarik Aanniz, Abdelmunim Essabbar, Fatima ElFalaki, Hicham Oumzil, Mohamed Rhajaoui, Saaïd Amzazi, Lahcen Belyamani and Azeddine Ibrahim                                                                                                                                              |
| EPI_ISL_1913035                                                                                                                                                                                                                                                                                                                                                                                                                                                                                                                                                                                                                                                                                                                                                                                                                                                                                                                                                                                                                                                                                                                                                                                                                                                                                                                                                                                                                 | EPI_ISL_1914289                                                                                                                                                                                                                                                                                                                                                                                                                                                                                                                                                                                                                                                                                                                                                                                                                                                                                                                                                                                                                                                                                                                                                                                                                                                                                                                                                                                                                                                                                                                                                                                                                                                                                                                                                                                                                                                                                                                                                                                                                                                                                                                                                                                                                                                                                                   | Centre de Recherches Médicales de Lambaréné (CERMEL)                                                    | Centre de Recherches Médicales de Lambaréné (CERMEL)                                                           | Gédéon Prince Manouana, Anicet Mouïy Matoumba, Michel Ngonga Dikongo, Georgetin Nguema Ondo, Rodrigue Bikangui, Samira Zoa Assoumou, Srinivas reddy Pallerla, Jean Bernard Lekana-Douki, Joël-Fleury Djoba Siawaya, Steffen Borrmann, Thirumalaisamy P. Velavan, Bertrand Lell and Ayola Akim Adegnika |
| EPI_ISL_1914289                                                                                                                                                                                                                                                                                                                                                                                                                                                                                                                                                                                                                                                                                                                                                                                                                                                                                                                                                                                                                                                                                                                                                                                                                                                                                                                                                                                                                 | EPI_ISL_1914787, EPI_ISL_1914788, EPI_ISL_1914789, EPI_ISL_1914790, EPI_ISL_1914791, EPI_ISL_1914792, EPI_ISL_1914793, EPI_ISL_1914794, EPI_ISL_1914795, EPI_ISL_1914796, EPI_ISL_1914797, EPI_ISL_1914798, EPI_ISL_1914799, EPI_ISL_1914800, EPI_ISL_1914801, EPI_ISL_1914802, EPI_ISL_1914803, EPI_ISL_1914804, EPI_ISL_1914805, EPI_ISL_1914806, EPI_ISL_1914807, EPI_ISL_1914808, EPI_ISL_1914809, EPI_ISL_1914810, EPI_ISL_1914811, EPI_ISL_1914812, EPI_ISL_1914813, EPI_ISL_1914814, EPI_ISL_1914815, EPI_ISL_1914816, EPI_ISL_1914817, EPI_ISL_1914818, EPI_ISL_1914819, EPI_ISL_1914820, EPI_ISL_1914821, EPI_ISL_1914822, EPI_ISL_1914823, EPI_ISL_1914824, EPI_ISL_1914825, EPI_ISL_1914826, EPI_ISL_1914827, EPI_ISL_1914828, EPI_ISL_1914829, EPI_ISL_1914830, EPI_ISL_1914831, EPI_ISL_1914832, EPI_ISL_1914833, EPI_ISL_1914834, EPI_ISL_1914835, EPI_ISL_1914836, EPI_ISL_1914837, EPI_ISL_1914838, EPI_ISL_1914839, EPI_ISL_1914840, EPI_ISL_1914841, EPI_ISL_1914842, EPI_ISL_1914843, EPI_ISL_1914844, EPI_ISL_1914845, EPI_ISL_1914846, EPI_ISL_1914847, EPI_ISL_1914848, EPI_ISL_1914849, EPI_ISL_1914850, EPI_ISL_1914851, EPI_ISL_1914852, EPI_ISL_1914853, EPI_ISL_1914854, EPI_ISL_1914855, EPI_ISL_1914856, EPI_ISL_1914857, EPI_ISL_1914858, EPI_ISL_1914859, EPI_ISL_1914860, EPI_ISL_1914861, EPI_ISL_1914862, EPI_ISL_1914863, EPI_ISL_1914864, EPI_ISL_1914865, EPI_ISL_1914866, EPI_ISL_1914867, EPI_ISL_1914868, EPI_ISL_1914869, EPI_ISL_1914870, EPI_ISL_1914871, EPI_ISL_1914872, EPI_ISL_1914873, EPI_ISL_1914874, EPI_ISL_1914875, EPI_ISL_1914876, EPI_ISL_1914877, EPI_ISL_1914878, EPI_ISL_1914879, EPI_ISL_1914880, EPI_ISL_1914881, EPI_ISL_1914882, EPI_ISL_1914883, EPI_ISL_1914884, EPI_ISL_1914885, EPI_ISL_1914886, EPI_ISL_1914887, EPI_ISL_1914888, EPI_ISL_1914889, EPI_ISL_1914900, EPI_ISL_1914901, EPI_ISL_1914902, EPI_ISL_1914903, EPI_ISL_1914904, EPI_ISL_1914905, EPI_ISL_1914906, EPI_ISL_1914907, EPI_ISL_1914908, EPI_ISL_1914909, EPI_ISL_1914910, EPI_ISL_1914911, EPI_ISL_1914912, EPI_ISL_1914913, EPI_ISL_1914914, EPI_ISL_1914915, EPI_ISL_1914916, EPI_ISL_1914917, EPI_ISL_1914918, EPI_ISL_1914919, EPI_ISL_1914920, EPI_ISL_1914921, EPI_ISL_1914922, EPI_ISL_1914923, EPI_ISL_1914924, EPI_ISL_1914925, EPI_ISL_1914926, EPI_ISL_1914927 | Institut National d'Hygiène                                                                             | Laboratoire de Biotechnologie                                                                                  | Mouna Ouadghiri, Tarik Aanniz, Abdelmunim Essabbar, Fatima El Falaki, Hicham Oumzil, Mohamed Rhajaoui, Saaïd Amzazi, Lahcen Belyamani and Azeddine Ibrahim                                                                                                                                             |
| see above                                                                                                                                                                                                                                                                                                                                                                                                                                                                                                                                                                                                                                                                                                                                                                                                                                                                                                                                                                                                                                                                                                                                                                                                                                                                                                                                                                                                                       | see above                                                                                                                                                                                                                                                                                                                                                                                                                                                                                                                                                                                                                                                                                                                                                                                                                                                                                                                                                                                                                                                                                                                                                                                                                                                                                                                                                                                                                                                                                                                                                                                                                                                                                                                                                                                                                                                                                                                                                                                                                                                                                                                                                                                                                                                                                                         | National Institute for Communicable Diseases.National Health Laboratory Services, Gauteng, South Africa | National Institute for Communicable Diseases of the National Health Laboratory Service                         | Amoako DG, Scheepers C, Mohale T, Ntuli N, Mahlangu B, Ismail A, Bhiman JN                                                                                                                                                                                                                             |
| EPI_ISL_1915786, EPI_ISL_1915789, EPI_ISL_1915790, EPI_ISL_1915791, EPI_ISL_1915792, EPI_ISL_1915797, EPI_ISL_1915799, EPI_ISL_1915800, EPI_ISL_1917489, EPI_ISL_1917490, EPI_ISL_1917491                                                                                                                                                                                                                                                                                                                                                                                                                                                                                                                                                                                                                                                                                                                                                                                                                                                                                                                                                                                                                                                                                                                                                                                                                                       | see above                                                                                                                                                                                                                                                                                                                                                                                                                                                                                                                                                                                                                                                                                                                                                                                                                                                                                                                                                                                                                                                                                                                                                                                                                                                                                                                                                                                                                                                                                                                                                                                                                                                                                                                                                                                                                                                                                                                                                                                                                                                                                                                                                                                                                                                                                                         | EHA Clinics                                                                                             | National Reference Laboratory, Nigeria Centre for Disease Control                                              | Dr Ndodo Nnaemeka, Olusola Anuoluwapo Akanbi, Chimaobi Chukwu, Dr Omoare Adesuyi, Grace Esebanmen, Anthony Ahumbe, Catherine Okoi, Naidoo Dhamari, Nwando Mba, Dr Chikwe Ihekweazu                                                                                                                     |
| EPI_ISL_1935059                                                                                                                                                                                                                                                                                                                                                                                                                                                                                                                                                                                                                                                                                                                                                                                                                                                                                                                                                                                                                                                                                                                                                                                                                                                                                                                                                                                                                 | see above                                                                                                                                                                                                                                                                                                                                                                                                                                                                                                                                                                                                                                                                                                                                                                                                                                                                                                                                                                                                                                                                                                                                                                                                                                                                                                                                                                                                                                                                                                                                                                                                                                                                                                                                                                                                                                                                                                                                                                                                                                                                                                                                                                                                                                                                                                         | Centre de Recherches Médicales de Lambaréné (CERMEL)                                                    | Centre de Recherches Médicales de Lambaréné (CERMEL)                                                           | Gédéon Prince Manouana, Georgetin Nguema Ondo, Rodrigue Bikangui, Samira Zoa Assoumou, Srinivas reddy Pallerla, Jean Bernard Lekana-Douki, Joël-Fleury Djoba Siawaya, Steffen Borrmann, Thirumalaisamy P. Velavan, Bertrand Lell and Ayola Akim Adegnika                                               |
| EPI_ISL_1936296, EPI_ISL_1936297, EPI_ISL_1936298, EPI_ISL_1936299, EPI_ISL_1936300, EPI_ISL_1936301, EPI_ISL_1936302, EPI_ISL_1936303, EPI_ISL_1936304, EPI_ISL_1936305, EPI_ISL_1936306, EPI_ISL_1936307, EPI_ISL_1936308, EPI_ISL_1936309, EPI_ISL_1936310, EPI_ISL_1936311, EPI_ISL_1936312, EPI_ISL_1936313, EPI_ISL_1936314, EPI_ISL_1936315, EPI_ISL_1936316, EPI_ISL_1936317, EPI_ISL_1936318, EPI_ISL_1936319, EPI_ISL_1936320, EPI_ISL_1936321, EPI_ISL_1936322, EPI_ISL_1936323, EPI_ISL_1936324, EPI_ISL_1936325, EPI_ISL_1936326, EPI_ISL_1936327, EPI_ISL_1936328, EPI_ISL_1936329, EPI_ISL_1936330, EPI_ISL_1936331, EPI_ISL_1936332, EPI_ISL_1936333, EPI_ISL_1936334, EPI_ISL_1936335, EPI_ISL_1936336, EPI_ISL_1936337, EPI_ISL_1936338, EPI_ISL_1936339, EPI_ISL_1936340, EPI_ISL_1936341, EPI_ISL_1936342, EPI_ISL_1936343, EPI_ISL_1936344, EPI_ISL_1936345, EPI_ISL_1936346, EPI_ISL_1936347, EPI_ISL_1936348, EPI_ISL_1936349, EPI_ISL_1936350, EPI_ISL_1936351, EPI_ISL_1936352, EPI_ISL_1936353, EPI_ISL_1936354, EPI_ISL_1936355, EPI_ISL_1936356, EPI_ISL_1936357, EPI_ISL_1936358, EPI_ISL_1936359, EPI_ISL_1936360, EPI_ISL_1936361, EPI_ISL_1936362, EPI_ISL_1936363, EPI_ISL_1936364, EPI_ISL_1936365, EPI_ISL_1936366, EPI_ISL_1936367, EPI_ISL_1936368, EPI_ISL_1936369, EPI_ISL_1936370, EPI_ISL_1936371, EPI_ISL_1936372, EPI_ISL_1936373, EPI_ISL_1936374                                   | see above                                                                                                                                                                                                                                                                                                                                                                                                                                                                                                                                                                                                                                                                                                                                                                                                                                                                                                                                                                                                                                                                                                                                                                                                                                                                                                                                                                                                                                                                                                                                                                                                                                                                                                                                                                                                                                                                                                                                                                                                                                                                                                                                                                                                                                                                                                         | Main Chemical Laboratories Egypt Army                                                                   | Main Chemical Laboratories Egypt Army                                                                          | Sherine Helmy, Laila Elsayw, Ola Elroby, Mostfa Yakout, Mohamed Seadawy                                                                                                                                                                                                                                |
| EPI_ISL_1936375, EPI_ISL_1936376, EPI_ISL_1936377, EPI_ISL_1936378, EPI_ISL_1936379, EPI_ISL_1936380, EPI_ISL_1936381, EPI_ISL_1936382, EPI_ISL_1936383, EPI_ISL_1936384, EPI_ISL_1936385, EPI_ISL_1936386, EPI_ISL_1936387, EPI_ISL_1936388, EPI_ISL_1936389, EPI_ISL_1936390, EPI_ISL_1936391, EPI_ISL_1936392, EPI_ISL_1936393, EPI_ISL_1936394, EPI_ISL_1936395, EPI_ISL_1936396, EPI_ISL_1936397, EPI_ISL_1936398, EPI_ISL_1936399, EPI_ISL_1936400, EPI_ISL_1936401, EPI_ISL_1936402, EPI_ISL_1936403, EPI_ISL_1936404, EPI_ISL_1936405, EPI_ISL_1936406, EPI_ISL_1936407, EPI_ISL_1936408, EPI_ISL_1936409, EPI_ISL_1936410, EPI_ISL_1936411, EPI_ISL_1936412, EPI_ISL_1936413, EPI_ISL_1936414, EPI_ISL_1936415, EPI_ISL_1936416, EPI_ISL_1936417, EPI_ISL_1936418, EPI_ISL_1936419, EPI_ISL_1936420, EPI_ISL_1936421, EPI_ISL_1936422, EPI_ISL_1936423, EPI_ISL_1936424, EPI_ISL_1936425, EPI_ISL_1936426, EPI_ISL_1936427, EPI_ISL_1936428, EPI_ISL_1936429, EPI_ISL_1936430, EPI_ISL_1936431, EPI_ISL_1936432, EPI_ISL_1936433, EPI_ISL_1936434, EPI_ISL_1936435, EPI_ISL_1936436, EPI_ISL_1936437, EPI_ISL_1936438, EPI_ISL_1936439, EPI_ISL_1936440, EPI_ISL_1936441, EPI_ISL_1936442, EPI_ISL_1936443, EPI_ISL_1936444, EPI_ISL_1936445, EPI_ISL_1936446, EPI_ISL_1936447, EPI_ISL_1936448, EPI_ISL_1936449, EPI_ISL_1936450, EPI_ISL_1936451, EPI_ISL_1936452, EPI_ISL_1936453, EPI_ISL_1936454, EPI_ISL_1936455 | see above                                                                                                                                                                                                                                                                                                                                                                                                                                                                                                                                                                                                                                                                                                                                                                                                                                                                                                                                                                                                                                                                                                                                                                                                                                                                                                                                                                                                                                                                                                                                                                                                                                                                                                                                                                                                                                                                                                                                                                                                                                                                                                                                                                                                                                                                                                         | Laboratoire Professeur Daniel GAHOUMA (LPDG)                                                            | Centre de recherches médicales de Lambaréné (CERMEL)                                                           | Haruka Abe, Yuri Ushijima, Rodrigue Bikangui, Samira Zoa-Assoumou, Georgetin Nguema Ondo, Gédéon P. Manouana, Ayong Moure, Emilio Skarwan, Bénédicte Ndeboko, Rotimi Myrabolome Houeuchenou, Joel Fleury Djoba Siawaya, Bertrand Lell, Ayola A. Adegnika, Jiro Yasuda                                  |
| EPI_ISL_1970547, EPI_ISL_1970549, EPI_ISL_1970550, EPI_ISL_1970551, EPI_ISL_1970552, EPI_ISL_1970553, EPI_ISL_1970554, EPI_ISL_1970555, EPI_ISL_1970556, EPI_ISL_1970557, EPI_ISL_1970558, EPI_ISL_1970559, EPI_ISL_1970560, EPI_ISL_1970561, EPI_ISL_1970562, EPI_ISL_1970563                                                                                                                                                                                                                                                                                                                                                                                                                                                                                                                                                                                                                                                                                                                                                                                                                                                                                                                                                                                                                                                                                                                                                  | see above                                                                                                                                                                                                                                                                                                                                                                                                                                                                                                                                                                                                                                                                                                                                                                                                                                                                                                                                                                                                                                                                                                                                                                                                                                                                                                                                                                                                                                                                                                                                                                                                                                                                                                                                                                                                                                                                                                                                                                                                                                                                                                                                                                                                                                                                                                         | Nigeria Centre for Disease Control (NCDC)                                                               | African Centre for Excellence for Genomics of Infectious Diseases (ACEGID), Redeemer's University              | Olawoye, I.B., Oluniyi, P.E., Eromon, P.E., Oguzie, J.U., Kayode, A.T., Uwanibe, J.N., Ugwu, C.A., Akano, K.O., Ajojobasile, F.V., Abechi, P.S., Oluamide, T.J., Folarin, O., Happi, C.T.                                                                                                              |
| EPI_ISL_1970569                                                                                                                                                                                                                                                                                                                                                                                                                                                                                                                                                                                                                                                                                                                                                                                                                                                                                                                                                                                                                                                                                                                                                                                                                                                                                                                                                                                                                 | EPI_ISL_1972357, EPI_ISL_1972358, EPI_ISL_1972359, EPI_ISL_1972360, EPI_ISL_1972361, EPI_ISL_1972362, EPI_ISL_1972364                                                                                                                                                                                                                                                                                                                                                                                                                                                                                                                                                                                                                                                                                                                                                                                                                                                                                                                                                                                                                                                                                                                                                                                                                                                                                                                                                                                                                                                                                                                                                                                                                                                                                                                                                                                                                                                                                                                                                                                                                                                                                                                                                                                             | Centre de Recherche sur les Maladies Infectieuses                                                       | Centre de Recherche sur les Maladies Infectieuses                                                              | Prof. Francine Ntumi; Prof. Dr. Thirumalaisamy P. Velavan; Mfoutou Mapanguy Claujeans Chastel and Batchi-Bouyou Armel Landry                                                                                                                                                                           |
| EPI_ISL_1989326, EPI_ISL_1989331,                                                                                                                                                                                                                                                                                                                                                                                                                                                                                                                                                                                                                                                                                                                                                                                                                                                                                                                                                                                                                                                                                                                                                                                                                                                                                                                                                                                               | EPI_ISL_1989326, EPI_ISL_1989331,                                                                                                                                                                                                                                                                                                                                                                                                                                                                                                                                                                                                                                                                                                                                                                                                                                                                                                                                                                                                                                                                                                                                                                                                                                                                                                                                                                                                                                                                                                                                                                                                                                                                                                                                                                                                                                                                                                                                                                                                                                                                                                                                                                                                                                                                                 | EHA Clinics                                                                                             | National Reference Laboratory, Nigeria Centre for Disease Control                                              | Dr Ndodo Nnaemeka, Olusola Anuoluwapo Akanbi, Chimaobi Chukwu, Dr Omoare Adesuyi, Grace Esebanmen, Anthony Ahumbe, Catherine Okoi, Naidoo Dhamari, Nwando Mba, Dr Chikwe Ihekweazu                                                                                                                     |
| EPI_ISL_1989326, EPI_ISL_1989331,                                                                                                                                                                                                                                                                                                                                                                                                                                                                                                                                                                                                                                                                                                                                                                                                                                                                                                                                                                                                                                                                                                                                                                                                                                                                                                                                                                                               | EPI_ISL_1989326, EPI_ISL_1989331,                                                                                                                                                                                                                                                                                                                                                                                                                                                                                                                                                                                                                                                                                                                                                                                                                                                                                                                                                                                                                                                                                                                                                                                                                                                                                                                                                                                                                                                                                                                                                                                                                                                                                                                                                                                                                                                                                                                                                                                                                                                                                                                                                                                                                                                                                 | Laboratorio de Investigaciones de Baney                                                                 | Swiss Tropical and Public Health Institute                                                                     | Salome Hosch, Carlos Cortes, Claudia Daubenberger, Guillermo Garcia, Bonifacio Manguire Nlavo, Maximilian Mpina, Elizabeth Nyakarungu, Diosdado                                                                                                                                                        |

|                                                                                                                                                                                                                                                                                                                                                                                                                                                                                                                                                                                                                |                                                                                                                                                                       |                                                                                                                                                                                                                                                                                                                                                                          |                                                                                                                                                                                                                                                                                                                                        |
|----------------------------------------------------------------------------------------------------------------------------------------------------------------------------------------------------------------------------------------------------------------------------------------------------------------------------------------------------------------------------------------------------------------------------------------------------------------------------------------------------------------------------------------------------------------------------------------------------------------|-----------------------------------------------------------------------------------------------------------------------------------------------------------------------|--------------------------------------------------------------------------------------------------------------------------------------------------------------------------------------------------------------------------------------------------------------------------------------------------------------------------------------------------------------------------|----------------------------------------------------------------------------------------------------------------------------------------------------------------------------------------------------------------------------------------------------------------------------------------------------------------------------------------|
| EPI_ISL_1989335, EPI_ISL_1989339                                                                                                                                                                                                                                                                                                                                                                                                                                                                                                                                                                               |                                                                                                                                                                       |                                                                                                                                                                                                                                                                                                                                                                          | Odjama Nseng Ada, Mitoha Ondo O Ayekaba, Tobias Schindler, Philipp Wagner, Philip Wonder Phiri                                                                                                                                                                                                                                         |
| EPI_ISL_2001062, EPI_ISL_2001063, EPI_ISL_2001064                                                                                                                                                                                                                                                                                                                                                                                                                                                                                                                                                              | Immunology, Noguchi Memorial Institute for Medical Research                                                                                                           | Immunology, Noguchi Memorial Institute for Medical Research                                                                                                                                                                                                                                                                                                              | Halatoko,A.W., Maman,I., Sadjj,Y.A., Mohktar,Q., Asare,K.M., Kossi,K., Salah,D., Layibo,Y., Kumordjie,S., Agbodzi,B., Appiah-Kubi,J., Lamboni,L., Assane,H., Issa,Z., Awunyo,S., Dorkenoo,A., Bonney,J.K., Salou,M., Dagnran,A., Adu.B.                                                                                                |
| EPI_ISL_2001065, EPI_ISL_2001066, EPI_ISL_2001067, EPI_ISL_2001068                                                                                                                                                                                                                                                                                                                                                                                                                                                                                                                                             | Immunology, Noguchi Memorial Institute for Medical Research                                                                                                           | Immunology, Noguchi Memorial Institute for Medical Research                                                                                                                                                                                                                                                                                                              | Campbell,A., Wurie,I., Mohktar,Q., Harding,D., Kumordjie,S., Agbodzi,B., Asare,K.M., Appiah-Kubi,J., Rogers,J., Bonney,J.K., Gevao,S., Adu.B.                                                                                                                                                                                          |
| EPI_ISL_2001080, EPI_ISL_2001081, EPI_ISL_2001082, EPI_ISL_2001083, EPI_ISL_2001084, EPI_ISL_2001085, EPI_ISL_2001086, EPI_ISL_2001087, EPI_ISL_2001088, EPI_ISL_2001089, EPI_ISL_2001090, EPI_ISL_2001091, EPI_ISL_2001092, EPI_ISL_2001093, EPI_ISL_2001094, EPI_ISL_2001095, EPI_ISL_2001096, EPI_ISL_2001097, EPI_ISL_2001098                                                                                                                                                                                                                                                                              |                                                                                                                                                                       |                                                                                                                                                                                                                                                                                                                                                                          |                                                                                                                                                                                                                                                                                                                                        |
| see above                                                                                                                                                                                                                                                                                                                                                                                                                                                                                                                                                                                                      | Immunology, Noguchi Memorial Institute for Medical Research                                                                                                           | Immunology, Noguchi Memorial Institute for Medical Research                                                                                                                                                                                                                                                                                                              | Adu,B., Egyir,B., Kumordjie,S., Agbodzi,B., Yeboah.C., Mohktar,Q., Oteng,F., Owusu-Nyantakyi,C., Asare,K.M., Appiah-Kubi,J., Bonney,J.K., Odoom,J.K.                                                                                                                                                                                   |
| EPI_ISL_2002675, EPI_ISL_2002676, EPI_ISL_2002677, EPI_ISL_2002678, EPI_ISL_2002679, EPI_ISL_2002680, EPI_ISL_2002681, EPI_ISL_2002682, EPI_ISL_2002683, EPI_ISL_2002684, EPI_ISL_2002685, EPI_ISL_2002686, EPI_ISL_2002687                                                                                                                                                                                                                                                                                                                                                                                    |                                                                                                                                                                       |                                                                                                                                                                                                                                                                                                                                                                          |                                                                                                                                                                                                                                                                                                                                        |
| see above                                                                                                                                                                                                                                                                                                                                                                                                                                                                                                                                                                                                      | Laboratorio de Investigaciones de Baney                                                                                                                               | Swiss Tropical and Public Health Institute                                                                                                                                                                                                                                                                                                                               | Salome Hosch, Carlos Cortes, Claudia Daubenberger, Guillermo Garcia, Yahya Maidane, Bonifacio Manguire Nlavo, Maximilian Mpina, Elizabeth Nyakarungu, Diosdado Odjama Nseng Ada, Mitoha Ondo O Ayekaba, Tobias Schindler, Philipp Wagner, Philip Wonder Phiri                                                                          |
| EPI_ISL_794735, EPI_ISL_794736, EPI_ISL_794737, EPI_ISL_794738                                                                                                                                                                                                                                                                                                                                                                                                                                                                                                                                                 | 1-Laboratory of Microbiology, National Reference Lab, Charles Nicolle Hospital; 2-University of Tunis ElManar, Faculty of Medicine of Tunis, LR99ES09, Tunis, Tunisia | 1-Clinical and Experimental Pharmacology Lab, LR16SP02, National Center of Pharmacovigilance, University of Tunis El Manar, Tunis, Tunisia. 2-Neurodegenerative diseases and psychiatric troubles, LR18SP03, Razi Hospital, University of Tunis El Manar, Tunis, Tunisia. 3- Ministry of Health, National Observatory of New and Emerging Diseases, 1006, Tunis, Tunisia | Ilhem Boutiba-Ben Boubaker, Sameh Trabelsi, Nissaf Ben Alaya, Maher Kharrat, Alia BenKahla, Jalila Ben Khelil, Salma Abid, Sana Ferjani, Mouna Ben Sassi, Mouna Safer, Zaineb Hamzaoui, Guedi Ali Barreh, Habiba Ben Romdhane, Souissi Amira, Sarra Chamman, Hanen El Jebari, Asma Ferjani, Gaies Emna, Riadh Daghfous, Riadh Gouider. |
| EPI_ISL_803119, EPI_ISL_803120, EPI_ISL_803430, EPI_ISL_803851                                                                                                                                                                                                                                                                                                                                                                                                                                                                                                                                                 | Laboratory of Microbiology, National Reference Lab, Charles Nicolle Hospital; 2-University of Tunis ElManar, Faculty of Medicine of Tunis, LR99ES09, Tunis, Tunisia   | Clinical and Experimental Pharmacology Lab, LR16SP02, National Center of Pharmacovigilance, University of Tunis El Manar, Tunis, Tunisia. 2-Neurodegenerative diseases and psychiatric troubles, LR18SP03, Razi Hospital, University of Tunis El Manar, Tunis, Tunisia. 3- Ministry of Health, National Observatory of New and Emerging Diseases, 1006, Tunis, Tunisia   | Ilhem Boutiba-Ben Boubaker, Sameh Trabelsi, Nissaf Ben Alaya, Maher Kharrat, Alia BenKahla, Jalila Ben Khelil, Salma Abid, Sana Ferjani, Mouna Ben Sassi, Mouna Safer, Zaineb Hamzaoui, Habiba Ben Romdhane, Souissi Amira, Sarra Chamman, Hanen El Jebari, Ahmed Fakhfakh, Gaies Emna, Riadh Daghfous, Riadh Gouider.                 |
| EPI_ISL_855360, EPI_ISL_855361, EPI_ISL_855362, EPI_ISL_855363, EPI_ISL_855364, EPI_ISL_855365, EPI_ISL_855366, EPI_ISL_855367, EPI_ISL_855368, EPI_ISL_855369, EPI_ISL_855370, EPI_ISL_855371, EPI_ISL_855372, EPI_ISL_855373, EPI_ISL_855374, EPI_ISL_855375, EPI_ISL_855376, EPI_ISL_855377, EPI_ISL_855378, EPI_ISL_855379, EPI_ISL_855380                                                                                                                                                                                                                                                                 |                                                                                                                                                                       |                                                                                                                                                                                                                                                                                                                                                                          |                                                                                                                                                                                                                                                                                                                                        |
| see above                                                                                                                                                                                                                                                                                                                                                                                                                                                                                                                                                                                                      | Hospital                                                                                                                                                              | National Reference Center for Viruses of Respiratory Infections, Institut Pasteur, Paris                                                                                                                                                                                                                                                                                 | Marion Barbet, Sylvie Behillil, Méline Bizard, Angela Brisebarre, Camille Capel, Etienne Simon-Lorière, Vincent Enouf, Maud Vanpeene, Sylvie van der Werf,Combe Patrice                                                                                                                                                                |
| EPI_ISL_860553                                                                                                                                                                                                                                                                                                                                                                                                                                                                                                                                                                                                 | Ampath-Netcare                                                                                                                                                        | KRISP, KZn Research Innovation and Sequencing Platform                                                                                                                                                                                                                                                                                                                   | Giandhari J, Pillay S, Lessells R, Mdlalose K, York D, Khan S, Tegally H, Wilkinson E, de Oliveira T                                                                                                                                                                                                                                   |
| EPI_ISL_860554, EPI_ISL_860555, EPI_ISL_860556, EPI_ISL_860557, EPI_ISL_860558, EPI_ISL_860560, EPI_ISL_860561, EPI_ISL_860562, EPI_ISL_860563, EPI_ISL_860564, EPI_ISL_860565, EPI_ISL_860567, EPI_ISL_860568, EPI_ISL_860569, EPI_ISL_860570, EPI_ISL_860571, EPI_ISL_860572, EPI_ISL_860573, EPI_ISL_860574, EPI_ISL_860575, EPI_ISL_860577, EPI_ISL_860578, EPI_ISL_860582, EPI_ISL_860585, EPI_ISL_860587, EPI_ISL_860588, EPI_ISL_860589, EPI_ISL_860590, EPI_ISL_860591, EPI_ISL_860592, EPI_ISL_860593, EPI_ISL_860594                                                                                 |                                                                                                                                                                       |                                                                                                                                                                                                                                                                                                                                                                          |                                                                                                                                                                                                                                                                                                                                        |
| see above                                                                                                                                                                                                                                                                                                                                                                                                                                                                                                                                                                                                      | NHLS-IALCH                                                                                                                                                            | KRISP, KZn Research Innovation and Sequencing Platform                                                                                                                                                                                                                                                                                                                   | Giandhari J, Pillay S, Lessells R, Mdlalose K, York D, Khan S, Tegally H, Wilkinson E, de Oliveira T                                                                                                                                                                                                                                   |
| EPI_ISL_862786, EPI_ISL_862787, EPI_ISL_862788, EPI_ISL_862789, EPI_ISL_862790, EPI_ISL_862791, EPI_ISL_862792, EPI_ISL_862793, EPI_ISL_862794, EPI_ISL_862795, EPI_ISL_862796, EPI_ISL_862797, EPI_ISL_862798, EPI_ISL_862799, EPI_ISL_862800, EPI_ISL_862801, EPI_ISL_862802, EPI_ISL_862803, EPI_ISL_862804, EPI_ISL_862805, EPI_ISL_862806, EPI_ISL_862807, EPI_ISL_862808, EPI_ISL_862809, EPI_ISL_862810, EPI_ISL_862811, EPI_ISL_862812, EPI_ISL_862813                                                                                                                                                 |                                                                                                                                                                       |                                                                                                                                                                                                                                                                                                                                                                          |                                                                                                                                                                                                                                                                                                                                        |
| see above                                                                                                                                                                                                                                                                                                                                                                                                                                                                                                                                                                                                      | Cancer Biology Department, National Cancer Institute                                                                                                                  | Cancer Biology Department, National Cancer Institute                                                                                                                                                                                                                                                                                                                     | Zekri,A.N., Sedawy,M.G., Ahmed,O.S., Hafez,M.M., Soliman,H.K., Bahnassy,A.A., Elhosiény,F.W., Gad,A.E., Hamdy,M.S., Soliman,M.S., Soliman,L., Abouelhoda,M.                                                                                                                                                                            |
| EPI_ISL_871872                                                                                                                                                                                                                                                                                                                                                                                                                                                                                                                                                                                                 | Botswana Harvard HIV Reference Laboratory                                                                                                                             | Botswana Harvard HIV Reference Laboratory                                                                                                                                                                                                                                                                                                                                | Sikhulile Moyo, Dorcas Maruapula, Wonderfull Choga, Botshelo Radibe, Boitumelo Zuze, David Lawrence, Roger Shapiro, Shahin Lockman, Mosepele Mosepele, Joseph, Makhema, Simani Gaseitsiwe                                                                                                                                              |
| EPI_ISL_872197, EPI_ISL_872200, EPI_ISL_872202, EPI_ISL_872221, EPI_ISL_872222, EPI_ISL_872223, EPI_ISL_872224, EPI_ISL_872225, EPI_ISL_872226, EPI_ISL_872232, EPI_ISL_872240, EPI_ISL_872241, EPI_ISL_872242, EPI_ISL_872243, EPI_ISL_872244, EPI_ISL_872245, EPI_ISL_872246, EPI_ISL_872247, EPI_ISL_872248, EPI_ISL_872271, EPI_ISL_872272, EPI_ISL_872273, EPI_ISL_872326, EPI_ISL_872327, EPI_ISL_872328, EPI_ISL_872329, EPI_ISL_872330, EPI_ISL_872331, EPI_ISL_872332, EPI_ISL_872333, EPI_ISL_872334, EPI_ISL_872335, EPI_ISL_872336, EPI_ISL_872337, EPI_ISL_872338, EPI_ISL_884006, EPI_ISL_884007 |                                                                                                                                                                       |                                                                                                                                                                                                                                                                                                                                                                          |                                                                                                                                                                                                                                                                                                                                        |
| see above                                                                                                                                                                                                                                                                                                                                                                                                                                                                                                                                                                                                      | hopital                                                                                                                                                               | National Reference Center for Viruses of Respiratory Infections, Institut Pasteur, Paris                                                                                                                                                                                                                                                                                 | Marion Barbet, Sylvie Behillil, Méline Bizard, Angela Brisebarre, Camille Capel, Etienne Simon-Lorière, Vincent Enouf, Maud Vanpeene, Sylvie van der Werf,Combe Patrice                                                                                                                                                                |
| EPI_ISL_887419, EPI_ISL_887422, EPI_ISL_887423, EPI_ISL_887427, EPI_ISL_887430, EPI_ISL_887432, EPI_ISL_887433, EPI_ISL_887448, EPI_ISL_887449, EPI_ISL_887450, EPI_ISL_887451, EPI_ISL_887452, EPI_ISL_887453, EPI_ISL_887454, EPI_ISL_887504, EPI_ISL_887505                                                                                                                                                                                                                                                                                                                                                 |                                                                                                                                                                       |                                                                                                                                                                                                                                                                                                                                                                          |                                                                                                                                                                                                                                                                                                                                        |
| see above                                                                                                                                                                                                                                                                                                                                                                                                                                                                                                                                                                                                      | Instituto Nacional de Saude (INS), Mozambique                                                                                                                         | KRISP, KZn Research Innovation and Sequencing Platform                                                                                                                                                                                                                                                                                                                   | Nalia Ismael, Nadia Siteo, Paulo Arnaldo, Nedio Mabunda, Giandhari J, Pillay S, Tegally H, Wilkinson E, de Oliveira T                                                                                                                                                                                                                  |
| EPI_ISL_890195, EPI_ISL_890196, EPI_ISL_890197, EPI_ISL_890198, EPI_ISL_890199, EPI_ISL_890200, EPI_ISL_890201, EPI_ISL_890202, EPI_ISL_890203, EPI_ISL_890204, EPI_ISL_890205, EPI_ISL_890206, EPI_ISL_890207, EPI_ISL_890208, EPI_ISL_890209, EPI_ISL_890210, EPI_ISL_890211, EPI_ISL_890212, EPI_ISL_890213, EPI_ISL_890214, EPI_ISL_890215, EPI_ISL_890216, EPI_ISL_890217, EPI_ISL_890218, EPI_ISL_890219, EPI_ISL_890220, EPI_ISL_890221, EPI_ISL_890222, EPI_ISL_890223, EPI_ISL_890224, EPI_ISL_890225, EPI_ISL_890226, EPI_ISL_890227, EPI_ISL_890228, EPI_ISL_890229, EPI_ISL_890230, EPI_ISL_890231 |                                                                                                                                                                       |                                                                                                                                                                                                                                                                                                                                                                          |                                                                                                                                                                                                                                                                                                                                        |
| see above                                                                                                                                                                                                                                                                                                                                                                                                                                                                                                                                                                                                      | Cancer Biology Department, National Cancer Institute                                                                                                                  | Cancer Biology Department, National Cancer Institute                                                                                                                                                                                                                                                                                                                     | Zekri,A.N., Sedawy,M.G., Ahmed,O.S., Hafez,M.M., Soliman,H.K., Bahnassy,A.A., Elhosiény,F.W., Gad,A.E., Hamdy,M.S., Soliman,M.S., Soliman,L., Abouelhoda,M.                                                                                                                                                                            |
| EPI_ISL_890355, EPI_ISL_890356, EPI_ISL_890357, EPI_ISL_890358                                                                                                                                                                                                                                                                                                                                                                                                                                                                                                                                                 | Hospital                                                                                                                                                              | National Reference Center for Viruses of Respiratory Infections, Institut Pasteur, Paris                                                                                                                                                                                                                                                                                 | Marion Barbet, Sylvie Behillil, Méline Bizard, Angela Brisebarre, Camille Capel, Etienne Simon-Lorière, Vincent Enouf, Maud Vanpeene, Sylvie van der Werf,Combe Patrice                                                                                                                                                                |
| EPI_ISL_894220, EPI_ISL_894221, EPI_ISL_894222, EPI_ISL_894224, EPI_ISL_894225, EPI_ISL_894226, EPI_ISL_894227, EPI_ISL_894228, EPI_ISL_894229, EPI_ISL_894230, EPI_ISL_894231                                                                                                                                                                                                                                                                                                                                                                                                                                 |                                                                                                                                                                       |                                                                                                                                                                                                                                                                                                                                                                          |                                                                                                                                                                                                                                                                                                                                        |
| see above                                                                                                                                                                                                                                                                                                                                                                                                                                                                                                                                                                                                      | CH de Mayotte - Laboratoire de Biologie                                                                                                                               | National Reference Center for Viruses of Respiratory Infections, Institut Pasteur, Paris                                                                                                                                                                                                                                                                                 | Marion Barbet, Sylvie Behillil, Méline Bizard, Angela Brisebarre, Camille Capel, Etienne Simon-Lorière, Vincent Enouf, Maud Vanpeene, Sylvie van der Werf,Combe Patrice                                                                                                                                                                |
| EPI_ISL_906277, EPI_ISL_906278, EPI_ISL_906279, EPI_ISL_906280, EPI_ISL_906281, EPI_ISL_906282, EPI_ISL_906283, EPI_ISL_906284                                                                                                                                                                                                                                                                                                                                                                                                                                                                                 | Nigeria Centre for Disease Control (NCDC)                                                                                                                             | African Centre of Excellence for Genomics of Infectious Diseases (ACEGID), Redeemer's University                                                                                                                                                                                                                                                                         | Oluniyi P.E. et al                                                                                                                                                                                                                                                                                                                     |
| EPI_ISL_907093, EPI_ISL_907101, EPI_ISL_907102, EPI_ISL_907103, EPI_ISL_907104, EPI_ISL_907105, EPI_ISL_907106, EPI_ISL_907107, EPI_ISL_907108, EPI_ISL_907109, EPI_ISL_907110, EPI_ISL_907111, EPI_ISL_907112, EPI_ISL_907113, EPI_ISL_907114, EPI_ISL_907115, EPI_ISL_907116, EPI_ISL_907117, EPI_ISL_907118                                                                                                                                                                                                                                                                                                 |                                                                                                                                                                       |                                                                                                                                                                                                                                                                                                                                                                          |                                                                                                                                                                                                                                                                                                                                        |
| see above                                                                                                                                                                                                                                                                                                                                                                                                                                                                                                                                                                                                      | Cancer Biology Department, National Cancer Institute                                                                                                                  | Cancer Biology Department, National Cancer Institute                                                                                                                                                                                                                                                                                                                     | Zekri,A.N., Sedawy,M.G., Ahmed,O.S., Hafez,M.M., Soliman,H.K., Bahnassy,A.A., Elhosiény,F.W., Gad,A.E., Hamdy,M.S., Soliman,M.S., Soliman,L., Abouelhoda,M.                                                                                                                                                                            |
| EPI_ISL_909674, EPI_ISL_909687, EPI_ISL_909688, EPI_ISL_909689, EPI_ISL_909690, EPI_ISL_909691, EPI_ISL_909692, EPI_ISL_909693, EPI_ISL_909694, EPI_ISL_909695, EPI_ISL_909696, EPI_ISL_909697, EPI_ISL_909698, EPI_ISL_909699, EPI_ISL_909700, EPI_ISL_909701, EPI_ISL_909708, EPI_ISL_909709, EPI_ISL_909710, EPI_ISL_909711, EPI_ISL_909712, EPI_ISL_909713, EPI_ISL_909714, EPI_ISL_909715, EPI_ISL_909716, EPI_ISL_909717, EPI_ISL_909718, EPI_ISL_909719, EPI_ISL_909720, EPI_ISL_909721, EPI_ISL_909722, EPI_ISL_909723                                                                                 |                                                                                                                                                                       |                                                                                                                                                                                                                                                                                                                                                                          |                                                                                                                                                                                                                                                                                                                                        |
| see above                                                                                                                                                                                                                                                                                                                                                                                                                                                                                                                                                                                                      | CH de Mayotte - Laboratoire de Biologie                                                                                                                               | National Reference Center for Viruses of Respiratory Infections, Institut Pasteur, Paris                                                                                                                                                                                                                                                                                 | Marion Barbet, Sylvie Behillil, Méline Bizard, Angela Brisebarre, Camille Capel, Etienne Simon-Lorière, Vincent Enouf, Maud Vanpeene, Sylvie van der Werf,Combe Patrice                                                                                                                                                                |
| EPI_ISL_912375, EPI_ISL_912376, EPI_ISL_912377, EPI_ISL_912378, EPI_ISL_912379, EPI_ISL_912380, EPI_ISL_912386, EPI_ISL_912387, EPI_ISL_912388, EPI_ISL_912389, EPI_ISL_912390                                                                                                                                                                                                                                                                                                                                                                                                                                 |                                                                                                                                                                       |                                                                                                                                                                                                                                                                                                                                                                          |                                                                                                                                                                                                                                                                                                                                        |
| see above                                                                                                                                                                                                                                                                                                                                                                                                                                                                                                                                                                                                      | Fondation Congolaise pour la recherche medicale (FCRM), Francine Ntoumi                                                                                               | NGS Competence Center Tuebingen, Institut für Medizinische Mikrobiologie und Hygiene, Universitätsklinikum Tübingen                                                                                                                                                                                                                                                      | Angel Angelov                                                                                                                                                                                                                                                                                                                          |

|                                                                                                                                                                                                                                                                                                                                                                                                                                                                                                                                                                                                                                                                                                                                                                                                                                                                                                                                                                                                                                                                                                                                                                                                                                                                                                                                                                                                                                                                                                |                                           |                                                                                                                                                     |                                                                                                                                                                                                                                                               |
|------------------------------------------------------------------------------------------------------------------------------------------------------------------------------------------------------------------------------------------------------------------------------------------------------------------------------------------------------------------------------------------------------------------------------------------------------------------------------------------------------------------------------------------------------------------------------------------------------------------------------------------------------------------------------------------------------------------------------------------------------------------------------------------------------------------------------------------------------------------------------------------------------------------------------------------------------------------------------------------------------------------------------------------------------------------------------------------------------------------------------------------------------------------------------------------------------------------------------------------------------------------------------------------------------------------------------------------------------------------------------------------------------------------------------------------------------------------------------------------------|-------------------------------------------|-----------------------------------------------------------------------------------------------------------------------------------------------------|---------------------------------------------------------------------------------------------------------------------------------------------------------------------------------------------------------------------------------------------------------------|
| EPI_ISL_912401                                                                                                                                                                                                                                                                                                                                                                                                                                                                                                                                                                                                                                                                                                                                                                                                                                                                                                                                                                                                                                                                                                                                                                                                                                                                                                                                                                                                                                                                                 | PathCare                                  | National Health Laboratory Service (NHLS), Tygerberg                                                                                                | Susan Engelbrecht, Jean Maritz, Bronwyn Kleinhans, Houriyah Tegally, Eduan Wilkindon, Gert van Zyl, Wolfgang Preiser, Tulio de Oliveira                                                                                                                       |
| EPI_ISL_912402, EPI_ISL_912403                                                                                                                                                                                                                                                                                                                                                                                                                                                                                                                                                                                                                                                                                                                                                                                                                                                                                                                                                                                                                                                                                                                                                                                                                                                                                                                                                                                                                                                                 | CH de Mayotte - Laboratoire de Biologie   | National Reference Center for Viruses of Respiratory Infections, Institut Pasteur, Paris                                                            | Marion Barbet, Sylvie Behilli, Méline Bizard, Angela Brisebarre, Camille Capel, Etienne Simon-Lorière, Vincent Enouf, Maud Vanpeene, Sylvie van der Werf, Combe Patrice                                                                                       |
| EPI_ISL_912484, EPI_ISL_912521, EPI_ISL_912524, EPI_ISL_912526                                                                                                                                                                                                                                                                                                                                                                                                                                                                                                                                                                                                                                                                                                                                                                                                                                                                                                                                                                                                                                                                                                                                                                                                                                                                                                                                                                                                                                 | NHLS Universitas Academic                 | UFS Virology                                                                                                                                        | PA Bester, MM Nyaga, P Nthiga, MT Mogotsi, D Goedhals, T de Oliveira                                                                                                                                                                                          |
| EPI_ISL_914970, EPI_ISL_915192, EPI_ISL_915421                                                                                                                                                                                                                                                                                                                                                                                                                                                                                                                                                                                                                                                                                                                                                                                                                                                                                                                                                                                                                                                                                                                                                                                                                                                                                                                                                                                                                                                 | MRCG at LSHTM Genomics lab                | MRCG at LSHTM Genomics lab                                                                                                                          | Abdul Karim sesay, Abdoulie Kanteh, Jarra Manneh, Mariama Kujabi, Bakary Sanyang                                                                                                                                                                              |
| EPI_ISL_925882, EPI_ISL_925884, EPI_ISL_925885, EPI_ISL_925886, EPI_ISL_925887, EPI_ISL_925888, EPI_ISL_925889, EPI_ISL_925890, EPI_ISL_925891, EPI_ISL_925892, EPI_ISL_925908, EPI_ISL_925909, EPI_ISL_925910, EPI_ISL_925912, EPI_ISL_925914, EPI_ISL_925915                                                                                                                                                                                                                                                                                                                                                                                                                                                                                                                                                                                                                                                                                                                                                                                                                                                                                                                                                                                                                                                                                                                                                                                                                                 | see above                                 | Nucleic Acid Testing, National Reference Laboratory                                                                                                 | GIGA Medical Genomics                                                                                                                                                                                                                                         |
| EPI_ISL_933724                                                                                                                                                                                                                                                                                                                                                                                                                                                                                                                                                                                                                                                                                                                                                                                                                                                                                                                                                                                                                                                                                                                                                                                                                                                                                                                                                                                                                                                                                 | Botswana Harvard HIV Reference Laboratory | Botswana Harvard HIV Reference Laboratory                                                                                                           | Yvan Butera, Keith Durkin, Maria Artesi, Bouchra Boujemla, Robert Rutayisire, Patrick Tuyisenge, Esperence Umumarungu, Sébastien Bontems, Marie-Pierre Hayette, Nathalie Renotte, Swaibu Gatare, Jacob Souppgui, Sabin Nsanzimana, Vincent Bours, Léon Mutesa |
| EPI_ISL_935040                                                                                                                                                                                                                                                                                                                                                                                                                                                                                                                                                                                                                                                                                                                                                                                                                                                                                                                                                                                                                                                                                                                                                                                                                                                                                                                                                                                                                                                                                 | Botswana Harvard HIV Reference Laboratory | Botswana Harvard HIV Reference Laboratory                                                                                                           | Sikhulile Moyo, Dorcas Maruapula, Wonderful T. Choga, Botshelo Radibe, Boitumelo Zuze, David Lawrence, Roger Shapiro, Shahin Lockman, Mosepele Mosepele, Joseph Makhema, Simani Gaseitsiwe                                                                    |
| EPI_ISL_935042                                                                                                                                                                                                                                                                                                                                                                                                                                                                                                                                                                                                                                                                                                                                                                                                                                                                                                                                                                                                                                                                                                                                                                                                                                                                                                                                                                                                                                                                                 | Botswana Harvard HIV Reference Laboratory | Botswana Harvard HIV Reference Laboratory                                                                                                           | Sikhulile Moyo, Dorcas Maruapula, Wonderful Choga, Botshelo Radibe, Boitumelo Zuze, David Lawrence, Roger Shapiro, Shahin Lockman, Mosepele Mosepele, Joseph Makhema, Simani Gaseitsiwe                                                                       |
| EPI_ISL_935045                                                                                                                                                                                                                                                                                                                                                                                                                                                                                                                                                                                                                                                                                                                                                                                                                                                                                                                                                                                                                                                                                                                                                                                                                                                                                                                                                                                                                                                                                 | Botswana Harvard HIV Reference Laboratory | Botswana Harvard HIV Reference Laboratory                                                                                                           | Sikhulile Moyo, Dorcas Maruapula, Wonderful T. Choga, Botshelo Radibe, Boitumelo Zuze, David Lawrence, Roger Shapiro, Shahin Lockman, Mosepele Mosepele, Joseph Makhema, Simani Gaseitsiwe                                                                    |
| EPI_ISL_940762, EPI_ISL_940765, EPI_ISL_940768                                                                                                                                                                                                                                                                                                                                                                                                                                                                                                                                                                                                                                                                                                                                                                                                                                                                                                                                                                                                                                                                                                                                                                                                                                                                                                                                                                                                                                                 | Botswana Harvard HIV Reference Laboratory | Botswana Harvard HIV Reference Laboratory                                                                                                           | Sikhulile Moyo, Wonderful Choga, Dorcas Maruapula, Botshelo Radibe, Boitumelo Zuze, David Lawrence, Roger Shapiro, Shahin Lockman, Mosepele Mosepele, Joseph Makhema, Simani Gaseitsiwe                                                                       |
| EPI_ISL_940776                                                                                                                                                                                                                                                                                                                                                                                                                                                                                                                                                                                                                                                                                                                                                                                                                                                                                                                                                                                                                                                                                                                                                                                                                                                                                                                                                                                                                                                                                 | Botswana Harvard HIV Reference Laboratory | Botswana Harvard HIV Reference Laboratory                                                                                                           | Sikhulile Moyo, Dorcas Maruapula, Wonderful Choga, Botshelo Radibe, Boitumelo Zuze, Legodile T. Koepile David Lawrence, Roger L. Shapiro, Shahin Lockman, Mosepele Mosepele, Joseph Makhema, Simani Gaseitsiwe                                                |
| EPI_ISL_940844                                                                                                                                                                                                                                                                                                                                                                                                                                                                                                                                                                                                                                                                                                                                                                                                                                                                                                                                                                                                                                                                                                                                                                                                                                                                                                                                                                                                                                                                                 | Botswana Harvard HIV Reference Laboratory | Botswana Harvard HIV Reference Laboratory                                                                                                           | Sikhulile Moyo, Dorcas Maruapula, Wonderful Choga, Botshelo Radibe, Boitumelo Zuze, David Lawrence, Roger Shapiro, Shahin Lockman, Mosepele Mosepele, Joseph Makhema, Simani Gaseitsiwe                                                                       |
| EPI_ISL_940852, EPI_ISL_940856, EPI_ISL_940862, EPI_ISL_940864, EPI_ISL_940865, EPI_ISL_940866, EPI_ISL_940867, EPI_ISL_940868, EPI_ISL_940869, EPI_ISL_940870, EPI_ISL_940871, EPI_ISL_940874, EPI_ISL_940875, EPI_ISL_940876, EPI_ISL_940877, EPI_ISL_940878, EPI_ISL_940887, EPI_ISL_940888, EPI_ISL_940889, EPI_ISL_940890, EPI_ISL_940891                                                                                                                                                                                                                                                                                                                                                                                                                                                                                                                                                                                                                                                                                                                                                                                                                                                                                                                                                                                                                                                                                                                                                 | see above                                 | Vaccines and Infectious Diseases Analytics Research Unit (VIDA)                                                                                     | KRISP, KZN Research Innovation and Sequencing Platform                                                                                                                                                                                                        |
| EPI_ISL_941288, EPI_ISL_941292, EPI_ISL_941293, EPI_ISL_941294, EPI_ISL_941295, EPI_ISL_941296, EPI_ISL_941297, EPI_ISL_941926                                                                                                                                                                                                                                                                                                                                                                                                                                                                                                                                                                                                                                                                                                                                                                                                                                                                                                                                                                                                                                                                                                                                                                                                                                                                                                                                                                 | Nigeria Centre for Disease Control (NCDC) | African Centre of Excellence for Genomics of Infectious Diseases (ACEGID), Redeemer's University                                                    | Oluniji P.E. et al                                                                                                                                                                                                                                            |
| EPI_ISL_943992                                                                                                                                                                                                                                                                                                                                                                                                                                                                                                                                                                                                                                                                                                                                                                                                                                                                                                                                                                                                                                                                                                                                                                                                                                                                                                                                                                                                                                                                                 | Botswana Harvard HIV Reference Laboratory | Botswana Harvard HIV Reference Laboratory                                                                                                           | Sikhulile Moyo, Wonderful T. Choga, Dorcas Maruapula, Botshelo Radibe, Boitumelo Zuze, David Lawrence, Roger Shapiro, Shahin Lockman, Mosepele Mosepele, Joseph Makhema, Simani Gaseitsiwe                                                                    |
| EPI_ISL_944124, EPI_ISL_944125, EPI_ISL_944127, EPI_ISL_944128, EPI_ISL_944130, EPI_ISL_944131, EPI_ISL_944132, EPI_ISL_944133, EPI_ISL_944134, EPI_ISL_944135, EPI_ISL_944136, EPI_ISL_944137, EPI_ISL_944138, EPI_ISL_944139, EPI_ISL_944144, EPI_ISL_944145, EPI_ISL_944146, EPI_ISL_944147, EPI_ISL_944148, EPI_ISL_944150, EPI_ISL_944151, EPI_ISL_944152, EPI_ISL_944153, EPI_ISL_944154, EPI_ISL_944155, EPI_ISL_944156, EPI_ISL_944157, EPI_ISL_944158, EPI_ISL_944159, EPI_ISL_944160, EPI_ISL_944161, EPI_ISL_944162, EPI_ISL_944163, EPI_ISL_944164, EPI_ISL_944165, EPI_ISL_944166, EPI_ISL_944167, EPI_ISL_944168, EPI_ISL_944169, EPI_ISL_944170, EPI_ISL_944171, EPI_ISL_944172, EPI_ISL_944173, EPI_ISL_944174, EPI_ISL_944175, EPI_ISL_944176, EPI_ISL_944177                                                                                                                                                                                                                                                                                                                                                                                                                                                                                                                                                                                                                                                                                                                 | see above                                 | National Health Laboratory Service, South Africa                                                                                                    | KRISP, KZN Research Innovation and Sequencing Platform                                                                                                                                                                                                        |
| EPI_ISL_944590                                                                                                                                                                                                                                                                                                                                                                                                                                                                                                                                                                                                                                                                                                                                                                                                                                                                                                                                                                                                                                                                                                                                                                                                                                                                                                                                                                                                                                                                                 | Botswana Harvard HIV Reference Laboratory | Botswana Harvard HIV Reference Laboratory                                                                                                           | Laguda-Akingba O, Giandhari J, Pillay S, Lessells R, Mdlalose K, York D, Khan S, Emmanuel SJ, Tegally H, Wilkinson E, de Oliveira T                                                                                                                           |
| EPI_ISL_944646, EPI_ISL_944647, EPI_ISL_944648, EPI_ISL_944649, EPI_ISL_944650, EPI_ISL_944651, EPI_ISL_944652, EPI_ISL_944653, EPI_ISL_944654, EPI_ISL_944655, EPI_ISL_944656, EPI_ISL_944657, EPI_ISL_944658, EPI_ISL_944659, EPI_ISL_944660, EPI_ISL_944661, EPI_ISL_944662, EPI_ISL_944663, EPI_ISL_944664, EPI_ISL_944665, EPI_ISL_944666, EPI_ISL_944667, EPI_ISL_944668, EPI_ISL_944669, EPI_ISL_944670, EPI_ISL_944671, EPI_ISL_944672, EPI_ISL_944673, EPI_ISL_944674, EPI_ISL_944675, EPI_ISL_944676, EPI_ISL_944677, EPI_ISL_944678, EPI_ISL_944679, EPI_ISL_944680, EPI_ISL_944681, EPI_ISL_944682, EPI_ISL_944683, EPI_ISL_944684, EPI_ISL_944685, EPI_ISL_944686, EPI_ISL_944687, EPI_ISL_944688, EPI_ISL_944689, EPI_ISL_944690, EPI_ISL_944691, EPI_ISL_944692, EPI_ISL_944693, EPI_ISL_944694, EPI_ISL_944695, EPI_ISL_944696, EPI_ISL_944697, EPI_ISL_944698, EPI_ISL_944699, EPI_ISL_944700, EPI_ISL_944701, EPI_ISL_944702, EPI_ISL_944703, EPI_ISL_944704, EPI_ISL_944705, EPI_ISL_944706, EPI_ISL_944707, EPI_ISL_944708, EPI_ISL_944709, EPI_ISL_944710, EPI_ISL_944711, EPI_ISL_944712, EPI_ISL_944713, EPI_ISL_944714, EPI_ISL_944715, EPI_ISL_944716, EPI_ISL_944717, EPI_ISL_944718, EPI_ISL_944719, EPI_ISL_944720, EPI_ISL_944721, EPI_ISL_944722, EPI_ISL_944723, EPI_ISL_944724, EPI_ISL_944725, EPI_ISL_944726, EPI_ISL_944727, EPI_ISL_944728, EPI_ISL_944729, EPI_ISL_944730, EPI_ISL_944731, EPI_ISL_944732, EPI_ISL_944733, EPI_ISL_944734, EPI_ISL_944735 | see above                                 | Department of Biochemistry, Cell and Molecular Biology, West African Centre for Cell Biology of Infectious Pathogens (WACCBIP), University of Ghana | Department of Biochemistry, Cell and Molecular Biology, West African Centre for Cell Biology of Infectious Pathogens (WACCBIP), University of Ghana                                                                                                           |
| EPI_ISL_944756                                                                                                                                                                                                                                                                                                                                                                                                                                                                                                                                                                                                                                                                                                                                                                                                                                                                                                                                                                                                                                                                                                                                                                                                                                                                                                                                                                                                                                                                                 | Botswana Harvard HIV Reference Laboratory | Botswana Harvard HIV Reference Laboratory                                                                                                           | Sikhulile Moyo, Wonderful T. Choga, Dorcas Maruapula, Botshelo Radibe, Boitumelo Zuze, David Lawrence, Roger Shapiro, Shahin Lockman, Mosepele Mosepele, Joseph Makhema, Simani Gaseitsiwe                                                                    |
| EPI_ISL_944757                                                                                                                                                                                                                                                                                                                                                                                                                                                                                                                                                                                                                                                                                                                                                                                                                                                                                                                                                                                                                                                                                                                                                                                                                                                                                                                                                                                                                                                                                 | Botswana Harvard HIV Reference Laboratory | Botswana Harvard HIV Reference Laboratory                                                                                                           | Sikhulile Moyo, Dorcas Maruapula, Wonderful Choga, Botshelo Radibe, Boitumelo Zuze, David Lawrence, Roger Shapiro, Shahin Lockman, Mosepele Mosepele, Joseph Makhema, Simani Gaseitsiwe                                                                       |
| EPI_ISL_944760, EPI_ISL_944761                                                                                                                                                                                                                                                                                                                                                                                                                                                                                                                                                                                                                                                                                                                                                                                                                                                                                                                                                                                                                                                                                                                                                                                                                                                                                                                                                                                                                                                                 | Botswana Harvard HIV Reference Laboratory | Botswana Harvard HIV Reference Laboratory                                                                                                           | Sikhulile Moyo, Wonderful T. Choga, Dorcas Maruapula, Botshelo Radibe, Boitumelo Zuze, David Lawrence, Roger Shapiro, Shahin Lockman, Mosepele Mosepele, Joseph Makhema, Simani Gaseitsiwe                                                                    |
| EPI_ISL_944767                                                                                                                                                                                                                                                                                                                                                                                                                                                                                                                                                                                                                                                                                                                                                                                                                                                                                                                                                                                                                                                                                                                                                                                                                                                                                                                                                                                                                                                                                 | Botswana Harvard HIV Reference Laboratory | Botswana Harvard HIV Reference Laboratory                                                                                                           | Sikhulile Moyo, Dorcas Maruapula, Wonderful Choga, Botshelo Radibe, Boitumelo Zuze, David Lawrence, Roger Shapiro, Shahin Lockman, Mosepele Mosepele, Joseph Makhema, Simani Gaseitsiwe                                                                       |
| EPI_ISL_944782                                                                                                                                                                                                                                                                                                                                                                                                                                                                                                                                                                                                                                                                                                                                                                                                                                                                                                                                                                                                                                                                                                                                                                                                                                                                                                                                                                                                                                                                                 | Botswana Harvard HIV Reference Laboratory | Botswana Harvard HIV Reference Laboratory                                                                                                           | Sikhulile Moyo, Wonderful T. Choga, Dorcas Maruapula, Botshelo Radibe, Boitumelo Zuze, David Lawrence, Roger Shapiro, Shahin Lockman, Mosepele Mosepele, Joseph Makhema, Simani Gaseitsiwe                                                                    |
| EPI_ISL_944790                                                                                                                                                                                                                                                                                                                                                                                                                                                                                                                                                                                                                                                                                                                                                                                                                                                                                                                                                                                                                                                                                                                                                                                                                                                                                                                                                                                                                                                                                 | Botswana Harvard HIV Reference Laboratory | Botswana Harvard HIV Reference Laboratory                                                                                                           | Sikhulile Moyo, Wonderful T. Choga, Dorcas Maruapula, Botshelo Radibe, Boitumelo Zuze, David Lawrence, Roger Shapiro, Shahin Lockman, Mosepele Mosepele, Joseph Makhema, Simani Gaseitsiwe                                                                    |
| EPI_ISL_949068                                                                                                                                                                                                                                                                                                                                                                                                                                                                                                                                                                                                                                                                                                                                                                                                                                                                                                                                                                                                                                                                                                                                                                                                                                                                                                                                                                                                                                                                                 | Botswana Harvard HIV Reference Laboratory | Botswana Harvard HIV Reference Laboratory                                                                                                           | Sikhulile Moyo, Wonderful T. Choga, Dorcas Maruapula, Botshelo Radibe, Boitumelo Zuze, David Lawrence, Roger Shapiro, Shahin Lockman, Mosepele Mosepele, Joseph Makhema, Simani Gaseitsiwe                                                                    |
| EPI_ISL_954226, EPI_ISL_954297, EPI_ISL_954298, EPI_ISL_954299, EPI_ISL_954300                                                                                                                                                                                                                                                                                                                                                                                                                                                                                                                                                                                                                                                                                                                                                                                                                                                                                                                                                                                                                                                                                                                                                                                                                                                                                                                                                                                                                 | MRC/UVRI & LSHTM Uganda Research Unit     | Where sequence data have been generated and submitted to GISAID                                                                                     | Matthew Cotten, Dan Lule Bugembe, My V.T. Phan, Isaac Sseewanyana, Patrick Semanda, Susan Nabadda, Pontiano Kaleebu                                                                                                                                           |
| EPI_ISL_955102                                                                                                                                                                                                                                                                                                                                                                                                                                                                                                                                                                                                                                                                                                                                                                                                                                                                                                                                                                                                                                                                                                                                                                                                                                                                                                                                                                                                                                                                                 | Botswana Harvard HIV Reference Laboratory | Botswana Harvard HIV Reference Laboratory                                                                                                           | Sikhulile Moyo, Wonderful Choga, Dorcas Maruapula, Botshelo Radibe, Boitumelo Zuze, David Lawrence, Roger Shapiro, Shahin Lockman, Mosepele Mosepele, Joseph Makhema, Simani Gaseitsiwe                                                                       |
| EPI_ISL_960226                                                                                                                                                                                                                                                                                                                                                                                                                                                                                                                                                                                                                                                                                                                                                                                                                                                                                                                                                                                                                                                                                                                                                                                                                                                                                                                                                                                                                                                                                 | Botswana Harvard HIV Reference Laboratory | Botswana Harvard HIV Reference Laboratory                                                                                                           | Sikhulile Moyo, Dorcas Maruapula, Wonderful T. Choga, Botshelo Radibe, Boitumelo Zuze, David Lawrence, Roger Shapiro, Shahin Lockman, Mosepele Mosepele, Joseph Makhema, Simani Gaseitsiwe                                                                    |
| EPI_ISL_960303                                                                                                                                                                                                                                                                                                                                                                                                                                                                                                                                                                                                                                                                                                                                                                                                                                                                                                                                                                                                                                                                                                                                                                                                                                                                                                                                                                                                                                                                                 | Botswana Harvard HIV Reference Laboratory | Botswana Harvard HIV Reference Laboratory                                                                                                           | Sikhulile Moyo, Dorcas Maruapula, Wonderful Choga, Botshelo Radibe, Boitumelo Zuze, David Lawrence, Roger Shapiro, Shahin Lockman, Mosepele Mosepele, Joseph Makhema, Simani Gaseitsiwe                                                                       |

|                                                                                                                                                                                                                                                                                                                                                                                                                                                                                                                                                                                                                                                                                                                                                                                                                                                                                                                                                                                                                                                                                                                                                                                                                                                                                                                                                                                                                                                                                                                                                                                                                                                                                                                                                                                                                                                                                                                |                                                                          |                                                                                                  |                                                                                                                                                                                                                                                                                                                                                                                            |
|----------------------------------------------------------------------------------------------------------------------------------------------------------------------------------------------------------------------------------------------------------------------------------------------------------------------------------------------------------------------------------------------------------------------------------------------------------------------------------------------------------------------------------------------------------------------------------------------------------------------------------------------------------------------------------------------------------------------------------------------------------------------------------------------------------------------------------------------------------------------------------------------------------------------------------------------------------------------------------------------------------------------------------------------------------------------------------------------------------------------------------------------------------------------------------------------------------------------------------------------------------------------------------------------------------------------------------------------------------------------------------------------------------------------------------------------------------------------------------------------------------------------------------------------------------------------------------------------------------------------------------------------------------------------------------------------------------------------------------------------------------------------------------------------------------------------------------------------------------------------------------------------------------------|--------------------------------------------------------------------------|--------------------------------------------------------------------------------------------------|--------------------------------------------------------------------------------------------------------------------------------------------------------------------------------------------------------------------------------------------------------------------------------------------------------------------------------------------------------------------------------------------|
| EPI_ISL_960312                                                                                                                                                                                                                                                                                                                                                                                                                                                                                                                                                                                                                                                                                                                                                                                                                                                                                                                                                                                                                                                                                                                                                                                                                                                                                                                                                                                                                                                                                                                                                                                                                                                                                                                                                                                                                                                                                                 | Botswana Harvard HIV Reference Laboratory                                | Botswana Harvard HIV Reference Laboratory                                                        | Sikhulile Moyo, Wonderful T. Choga, Dorcas Maruapula, Botshelo Radibe, Boitumelo Zuze, David Lawrence, Roger Shapiro, Shahin Lockman, Mosepele Mosepele, Joseph Makhema, Simani Gaseitsiwe                                                                                                                                                                                                 |
| EPI_ISL_962880                                                                                                                                                                                                                                                                                                                                                                                                                                                                                                                                                                                                                                                                                                                                                                                                                                                                                                                                                                                                                                                                                                                                                                                                                                                                                                                                                                                                                                                                                                                                                                                                                                                                                                                                                                                                                                                                                                 | Botswana Harvard HIV Reference Laboratory                                | Botswana Harvard HIV Reference Laboratory                                                        | Sikhulile Moyo, Wonderful T. Choga, Dorcas Maruapula, Botshelo Radibe, Boitumelo Zuze, David Lawrence, Roger Shapiro, Shahin Lockman, Mosepele Mosepele, Joseph, Makhema, Simani Gaseitsiwe                                                                                                                                                                                                |
| EPI_ISL_962882, EPI_ISL_962886                                                                                                                                                                                                                                                                                                                                                                                                                                                                                                                                                                                                                                                                                                                                                                                                                                                                                                                                                                                                                                                                                                                                                                                                                                                                                                                                                                                                                                                                                                                                                                                                                                                                                                                                                                                                                                                                                 | Botswana Harvard HIV Reference Laboratory                                | Botswana Harvard HIV Reference Laboratory                                                        | Sikhulile Moyo, Wonderful T. Choga, Dorcas Maruapula, Botshelo Radibe, Boitumelo Zuze, David Lawrence, Roger Shapiro, Shahin Lockman, Mosepele Mosepele, Joseph Makhema, Simani Gaseitsiwe                                                                                                                                                                                                 |
| EPI_ISL_964918, EPI_ISL_964919, EPI_ISL_964920, EPI_ISL_964921, EPI_ISL_964922, EPI_ISL_964923, EPI_ISL_964924, EPI_ISL_964925, EPI_ISL_964926, EPI_ISL_964927, EPI_ISL_964928, EPI_ISL_964929, EPI_ISL_964930, EPI_ISL_964931, EPI_ISL_964932, EPI_ISL_964933, EPI_ISL_964934, EPI_ISL_964935, EPI_ISL_964936, EPI_ISL_964937, EPI_ISL_964938, EPI_ISL_964939, EPI_ISL_964940, EPI_ISL_964941, EPI_ISL_964942, EPI_ISL_964943, EPI_ISL_964944, EPI_ISL_964945, EPI_ISL_964946, EPI_ISL_964947, EPI_ISL_964948                                                                                                                                                                                                                                                                                                                                                                                                                                                                                                                                                                                                                                                                                                                                                                                                                                                                                                                                                                                                                                                                                                                                                                                                                                                                                                                                                                                                 | Botswana Harvard HIV Reference Laboratory                                | Botswana Harvard HIV Reference Laboratory                                                        | Sikhulile Moyo, Wonderful T. Choga, Dorcas Maruapula, Botshelo Radibe, Boitumelo Zuze, David Lawrence, Roger Shapiro, Shahin Lockman, Mosepele Mosepele, Joseph Makhema, Simani Gaseitsiwe                                                                                                                                                                                                 |
| see above                                                                                                                                                                                                                                                                                                                                                                                                                                                                                                                                                                                                                                                                                                                                                                                                                                                                                                                                                                                                                                                                                                                                                                                                                                                                                                                                                                                                                                                                                                                                                                                                                                                                                                                                                                                                                                                                                                      | Instituto Nacional de Saude (INS), Mozambique                            | KRISP, KZN Research Innovation and Sequencing Platform                                           | Nalia Ismael, Nadia Siteo, Paulo Arnaldo, Nedio Mabunda, Giandhari J, Pillay S, Emmanuel S, Tegally H, Wilkinson E, de Oliveira T                                                                                                                                                                                                                                                          |
| EPI_ISL_965122, EPI_ISL_965123, EPI_ISL_965124                                                                                                                                                                                                                                                                                                                                                                                                                                                                                                                                                                                                                                                                                                                                                                                                                                                                                                                                                                                                                                                                                                                                                                                                                                                                                                                                                                                                                                                                                                                                                                                                                                                                                                                                                                                                                                                                 | Viral Respiratory Lab, National Institute for Biomedical Research (INRB) | Pathogen Sequencing Lab, National Institute for Biomedical Research (INRB)                       | Placide Mbala-Kingebeni, Edith Nkwembe, Eddy Kinganda-Lusamaki, Amuri Aziza, Francisca Muyembe Mawete, Emmanuel Lokilo Lofiko, Jean-Claude Makangara Cigolo, Catherine Pratt, Matthias Pauthner, Josh Quick, Allison Black, James Hadfield, Trevor Bedford, Ian Goodfellow, Andrew Rambaut, Nick Loman, Kristian Andersen, Michael Wiley, Steve Ahuka-Mundeke, Jean-Jacques Muyembe Tamfum |
| EPI_ISL_965178                                                                                                                                                                                                                                                                                                                                                                                                                                                                                                                                                                                                                                                                                                                                                                                                                                                                                                                                                                                                                                                                                                                                                                                                                                                                                                                                                                                                                                                                                                                                                                                                                                                                                                                                                                                                                                                                                                 | Botswana Harvard HIV Reference Laboratory                                | Botswana Harvard AIDS Institute Partnership                                                      | Sikhulile Moyo, Wonderful T. Choga, Dorcas Maruapula, Botshelo Radibe, Boitumelo Zuze, David Lawrence, Roger Shapiro, Shahin Lockman, Mosepele Mosepele, Joseph Makhema, Simani Gaseitsiwe                                                                                                                                                                                                 |
| EPI_ISL_965181                                                                                                                                                                                                                                                                                                                                                                                                                                                                                                                                                                                                                                                                                                                                                                                                                                                                                                                                                                                                                                                                                                                                                                                                                                                                                                                                                                                                                                                                                                                                                                                                                                                                                                                                                                                                                                                                                                 | Botswana Harvard HIV Reference Laboratory                                | Botswana Harvard HIV Reference Laboratory                                                        | Sikhulile Moyo, Dorcas Maruapula, Wonderful T. Choga, Botshelo Radibe, Boitumelo Zuze, David Lawrence, Roger Shapiro, Shahin Lockman, Mosepele Mosepele, Joseph Makhema, Simani Gaseitsiwe                                                                                                                                                                                                 |
| EPI_ISL_965182                                                                                                                                                                                                                                                                                                                                                                                                                                                                                                                                                                                                                                                                                                                                                                                                                                                                                                                                                                                                                                                                                                                                                                                                                                                                                                                                                                                                                                                                                                                                                                                                                                                                                                                                                                                                                                                                                                 | Botswana Harvard AIDS Institute Partnership                              | Botswana Harvard AIDS Institute Partnership                                                      | Sikhulile Moyo, Wonderful T. Choga, Dorcas Maruapula, Botshelo Radibe, Boitumelo Zuze, David Lawrence, Roger Shapiro, Shahin Lockman, Mosepele Mosepele, Joseph Makhema, Simani Gaseitsiwe                                                                                                                                                                                                 |
| EPI_ISL_965264, EPI_ISL_965277, EPI_ISL_965909                                                                                                                                                                                                                                                                                                                                                                                                                                                                                                                                                                                                                                                                                                                                                                                                                                                                                                                                                                                                                                                                                                                                                                                                                                                                                                                                                                                                                                                                                                                                                                                                                                                                                                                                                                                                                                                                 | Botswana Harvard HIV Reference Laboratory                                | Botswana Harvard HIV Reference Laboratory                                                        | Sikhulile Moyo, Wonderful T. Choga, Dorcas Maruapula, Botshelo Radibe, Boitumelo Zuze, David Lawrence, Roger Shapiro, Shahin Lockman, Mosepele Mosepele, Joseph Makhema, Simani Gaseitsiwe                                                                                                                                                                                                 |
| EPI_ISL_968214, EPI_ISL_968234, EPI_ISL_968252                                                                                                                                                                                                                                                                                                                                                                                                                                                                                                                                                                                                                                                                                                                                                                                                                                                                                                                                                                                                                                                                                                                                                                                                                                                                                                                                                                                                                                                                                                                                                                                                                                                                                                                                                                                                                                                                 | Botswana Harvard HIV Reference Laboratory                                | Botswana Harvard HIV Reference Laboratory                                                        | Sikhulile Moyo, Dorcas Maruapula, Wonderful Choga, Botshelo Radibe, Boitumelo Zuze, David Lawrence, Roger Shapiro, Shahin Lockman, Mosepele Mosepele, Joseph Makhema, Simani Gaseitsiwe                                                                                                                                                                                                    |
| EPI_ISL_968853, EPI_ISL_968855, EPI_ISL_968856                                                                                                                                                                                                                                                                                                                                                                                                                                                                                                                                                                                                                                                                                                                                                                                                                                                                                                                                                                                                                                                                                                                                                                                                                                                                                                                                                                                                                                                                                                                                                                                                                                                                                                                                                                                                                                                                 | KEMRI-Wellcome Trust Research Programme/KEMRI-CGMR-C Kilifi              | KEMRI-Wellcome Trust Research Programme/KEMRI-CGMR-C Kilifi                                      | Githinji et al                                                                                                                                                                                                                                                                                                                                                                             |
| EPI_ISL_968857                                                                                                                                                                                                                                                                                                                                                                                                                                                                                                                                                                                                                                                                                                                                                                                                                                                                                                                                                                                                                                                                                                                                                                                                                                                                                                                                                                                                                                                                                                                                                                                                                                                                                                                                                                                                                                                                                                 | Botswana Harvard HIV Reference Laboratory                                | Botswana Harvard HIV Reference Laboratory                                                        | Sikhulile Moyo, Dorcas Maruapula, Wonderful Choga, Botshelo Radibe, Boitumelo Zuze, David Lawrence, Roger Shapiro, Shahin Lockman, Mosepele Mosepele, Joseph Makhema, Simani Gaseitsiwe                                                                                                                                                                                                    |
| EPI_ISL_968858, EPI_ISL_968860, EPI_ISL_968861, EPI_ISL_968863, EPI_ISL_968864, EPI_ISL_968865, EPI_ISL_968868, EPI_ISL_968869, EPI_ISL_968871, EPI_ISL_968873, EPI_ISL_968877, EPI_ISL_968898, EPI_ISL_968999, EPI_ISL_969001, EPI_ISL_969002, EPI_ISL_969003, EPI_ISL_969004, EPI_ISL_969005, EPI_ISL_969007, EPI_ISL_969008, EPI_ISL_969009, EPI_ISL_969010, EPI_ISL_969011, EPI_ISL_969012, EPI_ISL_969013, EPI_ISL_969014, EPI_ISL_969016, EPI_ISL_969017, EPI_ISL_969018, EPI_ISL_969019, EPI_ISL_969020, EPI_ISL_969021, EPI_ISL_969023, EPI_ISL_969024, EPI_ISL_969025, EPI_ISL_969026, EPI_ISL_969027, EPI_ISL_969028, EPI_ISL_969029, EPI_ISL_969030, EPI_ISL_969031                                                                                                                                                                                                                                                                                                                                                                                                                                                                                                                                                                                                                                                                                                                                                                                                                                                                                                                                                                                                                                                                                                                                                                                                                                 | Botswana Harvard HIV Reference Laboratory                                | Botswana Harvard HIV Reference Laboratory                                                        | Sikhulile Moyo, Dorcas Maruapula, Wonderful Choga, Botshelo Radibe, Boitumelo Zuze, David Lawrence, Roger Shapiro, Shahin Lockman, Mosepele Mosepele, Joseph Makhema, Simani Gaseitsiwe                                                                                                                                                                                                    |
| see above                                                                                                                                                                                                                                                                                                                                                                                                                                                                                                                                                                                                                                                                                                                                                                                                                                                                                                                                                                                                                                                                                                                                                                                                                                                                                                                                                                                                                                                                                                                                                                                                                                                                                                                                                                                                                                                                                                      | KEMRI-Wellcome Trust Research Programme/KEMRI-CGMR-C Kilifi              | KEMRI-Wellcome Trust Research Programme/KEMRI-CGMR-C Kilifi                                      | Githinji et al                                                                                                                                                                                                                                                                                                                                                                             |
| EPI_ISL_969034                                                                                                                                                                                                                                                                                                                                                                                                                                                                                                                                                                                                                                                                                                                                                                                                                                                                                                                                                                                                                                                                                                                                                                                                                                                                                                                                                                                                                                                                                                                                                                                                                                                                                                                                                                                                                                                                                                 | Botswana Harvard HIV Reference Laboratory                                | Botswana Harvard HIV Reference Laboratory                                                        | Sikhulile Moyo, Dorcas Maruapula, Wonderful Choga, Botshelo Radibe, Boitumelo Zuze, David Lawrence, Roger Shapiro, Shahin Lockman, Mosepele Mosepele, Joseph Makhema, Simani Gaseitsiwe                                                                                                                                                                                                    |
| EPI_ISL_969041, EPI_ISL_969042, EPI_ISL_969043, EPI_ISL_969044, EPI_ISL_969046, EPI_ISL_969047, EPI_ISL_969048, EPI_ISL_969049, EPI_ISL_969050, EPI_ISL_969051, EPI_ISL_969052, EPI_ISL_969053, EPI_ISL_969054, EPI_ISL_969056, EPI_ISL_969057, EPI_ISL_969058, EPI_ISL_969059, EPI_ISL_969060, EPI_ISL_969061, EPI_ISL_969063, EPI_ISL_969064, EPI_ISL_969065, EPI_ISL_969066, EPI_ISL_969067, EPI_ISL_969068, EPI_ISL_969069, EPI_ISL_969071, EPI_ISL_969072, EPI_ISL_969073, EPI_ISL_969074, EPI_ISL_969245                                                                                                                                                                                                                                                                                                                                                                                                                                                                                                                                                                                                                                                                                                                                                                                                                                                                                                                                                                                                                                                                                                                                                                                                                                                                                                                                                                                                 | Botswana Harvard HIV Reference Laboratory                                | Botswana Harvard HIV Reference Laboratory                                                        | Sikhulile Moyo, Dorcas Maruapula, Wonderful Choga, Botshelo Radibe, Boitumelo Zuze, David Lawrence, Roger Shapiro, Shahin Lockman, Mosepele Mosepele, Joseph Makhema, Simani Gaseitsiwe                                                                                                                                                                                                    |
| see above                                                                                                                                                                                                                                                                                                                                                                                                                                                                                                                                                                                                                                                                                                                                                                                                                                                                                                                                                                                                                                                                                                                                                                                                                                                                                                                                                                                                                                                                                                                                                                                                                                                                                                                                                                                                                                                                                                      | KEMRI-Wellcome Trust Research Programme/KEMRI-CGMR-C Kilifi              | KEMRI-Wellcome Trust Research Programme/KEMRI-CGMR-C Kilifi                                      | Githinji et al                                                                                                                                                                                                                                                                                                                                                                             |
| EPI_ISL_977270, EPI_ISL_977278, EPI_ISL_977292, EPI_ISL_977334, EPI_ISL_977346, EPI_ISL_977347, EPI_ISL_977348, EPI_ISL_977349, EPI_ISL_977350, EPI_ISL_977351, EPI_ISL_977468                                                                                                                                                                                                                                                                                                                                                                                                                                                                                                                                                                                                                                                                                                                                                                                                                                                                                                                                                                                                                                                                                                                                                                                                                                                                                                                                                                                                                                                                                                                                                                                                                                                                                                                                 | University of Zambia, School of Veterinary Medicine                      | UNZAVET and PATH                                                                                 | Mulenga Mwenda-Chimfwembe, Ngonda Saasa, Daniel Bridges                                                                                                                                                                                                                                                                                                                                    |
| see above                                                                                                                                                                                                                                                                                                                                                                                                                                                                                                                                                                                                                                                                                                                                                                                                                                                                                                                                                                                                                                                                                                                                                                                                                                                                                                                                                                                                                                                                                                                                                                                                                                                                                                                                                                                                                                                                                                      | University of Zambia, School of Veterinary Medicine                      | UNZAVET and PATH                                                                                 | Mulenga Mwenda-Chimfwembe, Ngonda Saasa, Daniel Bridges                                                                                                                                                                                                                                                                                                                                    |
| EPI_ISL_977499                                                                                                                                                                                                                                                                                                                                                                                                                                                                                                                                                                                                                                                                                                                                                                                                                                                                                                                                                                                                                                                                                                                                                                                                                                                                                                                                                                                                                                                                                                                                                                                                                                                                                                                                                                                                                                                                                                 | Botswana Harvard HIV Reference Laboratory                                | Botswana Harvard HIV Reference Laboratory                                                        | Sikhulile Moyo, Dorcas Maruapula, Wonderful Choga, Botshelo Radibe, Boitumelo Zuze, David Lawrence, Roger Shapiro, Shahin Lockman, Mosepele Mosepele, Joseph Makhema, Simani Gaseitsiwe                                                                                                                                                                                                    |
| EPI_ISL_977540, EPI_ISL_977541, EPI_ISL_977542, EPI_ISL_977543, EPI_ISL_977544, EPI_ISL_977545, EPI_ISL_977546, EPI_ISL_977547, EPI_ISL_977548, EPI_ISL_977549, EPI_ISL_977550, EPI_ISL_977551, EPI_ISL_977552, EPI_ISL_977553, EPI_ISL_977554, EPI_ISL_977555, EPI_ISL_977556, EPI_ISL_977557, EPI_ISL_977558, EPI_ISL_977559, EPI_ISL_977560, EPI_ISL_977561, EPI_ISL_977562, EPI_ISL_977563, EPI_ISL_977564, EPI_ISL_977565                                                                                                                                                                                                                                                                                                                                                                                                                                                                                                                                                                                                                                                                                                                                                                                                                                                                                                                                                                                                                                                                                                                                                                                                                                                                                                                                                                                                                                                                                 | Botswana Harvard HIV Reference Laboratory                                | Botswana Harvard HIV Reference Laboratory                                                        | Sikhulile Moyo, Dorcas Maruapula, Wonderful Choga, Botshelo Radibe, Boitumelo Zuze, David Lawrence, Roger Shapiro, Shahin Lockman, Mosepele Mosepele, Joseph Makhema, Simani Gaseitsiwe                                                                                                                                                                                                    |
| see above                                                                                                                                                                                                                                                                                                                                                                                                                                                                                                                                                                                                                                                                                                                                                                                                                                                                                                                                                                                                                                                                                                                                                                                                                                                                                                                                                                                                                                                                                                                                                                                                                                                                                                                                                                                                                                                                                                      | Nigeria Centre of Disease Control (NCDC)                                 | African Centre of Excellence for Genomics of Infectious Diseases (ACEGID), Redeemer's University | Olawoye I. B. et al                                                                                                                                                                                                                                                                                                                                                                        |
| EPI_ISL_977664                                                                                                                                                                                                                                                                                                                                                                                                                                                                                                                                                                                                                                                                                                                                                                                                                                                                                                                                                                                                                                                                                                                                                                                                                                                                                                                                                                                                                                                                                                                                                                                                                                                                                                                                                                                                                                                                                                 | Hopital                                                                  | National Reference Center for Viruses of Respiratory Infections, Institut Pasteur, Paris         | Marion Barbet, Sylvie Behillil, Méline Bizard, Angela Brisebarre, Camille Capel, Etienne Simon-Lorière, Vincent Enouf, Maud Vanpeene, Sylvie van der Werf, Combe Patrice                                                                                                                                                                                                                   |
| EPI_ISL_981384, EPI_ISL_981386                                                                                                                                                                                                                                                                                                                                                                                                                                                                                                                                                                                                                                                                                                                                                                                                                                                                                                                                                                                                                                                                                                                                                                                                                                                                                                                                                                                                                                                                                                                                                                                                                                                                                                                                                                                                                                                                                 | Botswana Harvard HIV Reference Laboratory                                | Botswana Harvard HIV Reference Laboratory                                                        | Sikhulile Moyo, Dorcas Maruapula, Wonderful Choga, Botshelo Radibe, Boitumelo Zuze, David Lawrence, Roger Shapiro, Shahin Lockman, Mosepele Mosepele, Joseph Makhema, Simani Gaseitsiwe                                                                                                                                                                                                    |
| EPI_ISL_981548, EPI_ISL_982860                                                                                                                                                                                                                                                                                                                                                                                                                                                                                                                                                                                                                                                                                                                                                                                                                                                                                                                                                                                                                                                                                                                                                                                                                                                                                                                                                                                                                                                                                                                                                                                                                                                                                                                                                                                                                                                                                 | Botswana Harvard HIV Reference Laboratory                                | Botswana Harvard HIV Reference Laboratory                                                        | Sikhulile Moyo, Dorcas Maruapula, Wonderful T. Choga, Botshelo Radibe, Boitumelo Zuze, David Lawrence, Roger Shapiro, Shahin Lockman, Mosepele Mosepele, Joseph Makhema, Simani Gaseitsiwe                                                                                                                                                                                                 |
| EPI_ISL_985058, EPI_ISL_985059, EPI_ISL_985060, EPI_ISL_985061, EPI_ISL_985062, EPI_ISL_985063, EPI_ISL_985064, EPI_ISL_985065, EPI_ISL_985066, EPI_ISL_985067, EPI_ISL_985068, EPI_ISL_985069, EPI_ISL_985070, EPI_ISL_985071, EPI_ISL_985072, EPI_ISL_985073, EPI_ISL_985074, EPI_ISL_985075, EPI_ISL_985076, EPI_ISL_985077, EPI_ISL_985078, EPI_ISL_985079, EPI_ISL_985080, EPI_ISL_985081, EPI_ISL_985082, EPI_ISL_985083, EPI_ISL_985084, EPI_ISL_985085, EPI_ISL_985086, EPI_ISL_985087, EPI_ISL_985088, EPI_ISL_985089, EPI_ISL_985090, EPI_ISL_985091, EPI_ISL_985092, EPI_ISL_985093, EPI_ISL_985094, EPI_ISL_985095, EPI_ISL_985096, EPI_ISL_985097, EPI_ISL_985098, EPI_ISL_985099, EPI_ISL_985100, EPI_ISL_985101, EPI_ISL_985102, EPI_ISL_985103, EPI_ISL_985104, EPI_ISL_985105, EPI_ISL_985106, EPI_ISL_985107, EPI_ISL_985108, EPI_ISL_985109, EPI_ISL_985110, EPI_ISL_985111, EPI_ISL_985112, EPI_ISL_985113, EPI_ISL_985114, EPI_ISL_985115, EPI_ISL_985116, EPI_ISL_985117, EPI_ISL_985118, EPI_ISL_985119, EPI_ISL_985120, EPI_ISL_985121, EPI_ISL_985122, EPI_ISL_985123, EPI_ISL_985124, EPI_ISL_985125, EPI_ISL_985126, EPI_ISL_985127, EPI_ISL_985128, EPI_ISL_985129, EPI_ISL_985237, EPI_ISL_985238                                                                                                                                                                                                                                                                                                                                                                                                                                                                                                                                                                                                                                                                                 | Botswana Harvard HIV Reference Laboratory                                | Botswana Harvard HIV Reference Laboratory                                                        | Sikhulile Moyo, Dorcas Maruapula, Wonderful Choga, Botshelo Radibe, Boitumelo Zuze, David Lawrence, Roger Shapiro, Shahin Lockman, Mosepele Mosepele, Joseph Makhema, Simani Gaseitsiwe                                                                                                                                                                                                    |
| see above                                                                                                                                                                                                                                                                                                                                                                                                                                                                                                                                                                                                                                                                                                                                                                                                                                                                                                                                                                                                                                                                                                                                                                                                                                                                                                                                                                                                                                                                                                                                                                                                                                                                                                                                                                                                                                                                                                      | Biorepository and Clinical Virology Laboratory                           | Ozer Lab                                                                                         | Ramon Lorenzo-Redondo, Adeola A. Fowotade, Ewan C. Omoruyi, Johnson A. Adeniji, Lacy M. Simons, Judd F. Hultquist, Babafemi O. Taiwo, Oluabusuyi M. Adewumi, Egon A. Ozer                                                                                                                                                                                                                  |
| EPI_ISL_995331, EPI_ISL_995332, EPI_ISL_995333, EPI_ISL_995334, EPI_ISL_995335, EPI_ISL_995336, EPI_ISL_995337, EPI_ISL_995338, EPI_ISL_995339, EPI_ISL_995340, EPI_ISL_995341, EPI_ISL_995342, EPI_ISL_995343, EPI_ISL_995344, EPI_ISL_995345, EPI_ISL_995346, EPI_ISL_995347, EPI_ISL_995348, EPI_ISL_995349, EPI_ISL_995350, EPI_ISL_995351, EPI_ISL_995352, EPI_ISL_995353, EPI_ISL_995354, EPI_ISL_995355, EPI_ISL_995356, EPI_ISL_995357, EPI_ISL_995358, EPI_ISL_995359, EPI_ISL_995360, EPI_ISL_995361, EPI_ISL_995362, EPI_ISL_995363, EPI_ISL_995364, EPI_ISL_995365, EPI_ISL_995366, EPI_ISL_995367, EPI_ISL_995368, EPI_ISL_995369, EPI_ISL_995370, EPI_ISL_995371, EPI_ISL_995372, EPI_ISL_995373, EPI_ISL_995374, EPI_ISL_995375, EPI_ISL_995376, EPI_ISL_995377, EPI_ISL_995378, EPI_ISL_995379, EPI_ISL_995380, EPI_ISL_995381, EPI_ISL_995382, EPI_ISL_995383, EPI_ISL_995384, EPI_ISL_995385, EPI_ISL_995386, EPI_ISL_995387, EPI_ISL_995388, EPI_ISL_995389, EPI_ISL_995390, EPI_ISL_995391, EPI_ISL_995392, EPI_ISL_995393, EPI_ISL_995394, EPI_ISL_995395, EPI_ISL_995396, EPI_ISL_995397, EPI_ISL_995398, EPI_ISL_995399, EPI_ISL_995400, EPI_ISL_995401, EPI_ISL_995402, EPI_ISL_995403, EPI_ISL_995404, EPI_ISL_995405, EPI_ISL_995406, EPI_ISL_995407, EPI_ISL_995408, EPI_ISL_995409, EPI_ISL_995410, EPI_ISL_995411, EPI_ISL_995412, EPI_ISL_995413, EPI_ISL_995414, EPI_ISL_995415, EPI_ISL_995416, EPI_ISL_995417, EPI_ISL_995418, EPI_ISL_995419, EPI_ISL_995420, EPI_ISL_995421, EPI_ISL_995422, EPI_ISL_995423, EPI_ISL_995424, EPI_ISL_995425, EPI_ISL_995426, EPI_ISL_995427, EPI_ISL_995428, EPI_ISL_995429, EPI_ISL_995430, EPI_ISL_995431, EPI_ISL_995432, EPI_ISL_995433, EPI_ISL_995434, EPI_ISL_995435, EPI_ISL_995436, EPI_ISL_995437, EPI_ISL_995438, EPI_ISL_995439, EPI_ISL_995440, EPI_ISL_995441, EPI_ISL_995442, EPI_ISL_995443, EPI_ISL_995444, EPI_ISL_995445 | Botswana Harvard HIV Reference Laboratory                                | Botswana Harvard HIV Reference Laboratory                                                        | Sikhulile Moyo, Dorcas Maruapula, Wonderful Choga, Botshelo Radibe, Boitumelo Zuze, David Lawrence, Roger Shapiro, Shahin Lockman, Mosepele Mosepele, Joseph Makhema, Simani Gaseitsiwe                                                                                                                                                                                                    |
| see above                                                                                                                                                                                                                                                                                                                                                                                                                                                                                                                                                                                                                                                                                                                                                                                                                                                                                                                                                                                                                                                                                                                                                                                                                                                                                                                                                                                                                                                                                                                                                                                                                                                                                                                                                                                                                                                                                                      | Outre mer                                                                | National Reference Center for Viruses of Respiratory Infections, Institut Pasteur, Paris         | Marion Barbet, Sylvie Behillil, Méline Bizard, Angela Brisebarre, Camille Capel, Etienne Simon-Lorière, Vincent Enouf, Maud Vanpeene, Sylvie van der Werf, Combe Patrice                                                                                                                                                                                                                   |
| EPI_ISL_999030, EPI_ISL_999032                                                                                                                                                                                                                                                                                                                                                                                                                                                                                                                                                                                                                                                                                                                                                                                                                                                                                                                                                                                                                                                                                                                                                                                                                                                                                                                                                                                                                                                                                                                                                                                                                                                                                                                                                                                                                                                                                 | Institut Pasteur de Guinée                                               | Institut Pasteur de Dakar                                                                        | Grayo Solene, Diagne Moussa Moïse, Dia Ndongo, Diallo Amadou, Mbengue Safietou Sankhe, Ndiaye Ndack, Diop Mamadou, Loucoubar Cheikh, Tordo Noel, Faye Ousmane, Sall Amadou Alpha                                                                                                                                                                                                           |
